# Supplementary material
Source: PubMed Central journal article supplement (PMC518757)
Supplement: pnas_101_37_13417__1.pdf [file pnas_101_37_13417__1.pdf]

**Table 2. Trypsin 5 ppm search**

| Peptide no. | IPI number    | Mass  | Sequence               | m/z       | z | MS2-score | MS3-ion | MS3-score | Combined |
|-------------|---------------|-------|------------------------|-----------|---|-----------|---------|-----------|----------|
| 1           | IPI00120451.1 | 14294 | AIGLPEDLIQK            | 598.8489  | 2 | 41        | P y7    | 95.7      | 136.7    |
| 2           | IPI00120451.1 | 14294 | AIGLPEDLIQK            | 598.8475  | 2 | 44        | P y7    | 95.7      | 139.7    |
| 3           | IPI00120451.1 | 14294 | AIGLPEDLIQK            | 598.8488  | 2 | 48        | P y7    | 116.0     | 164.0    |
| 4           | IPI00120451.1 | 14294 | AIGLPEDLIQK            | 598.8474  | 2 | 54        | P y7    | 95.7      | 149.7    |
| 5           | IPI00120451.1 | 14294 | GVSEIVHEGK             | 352.1891  | 3 | 17        | y6      | 15.6      | 32.6     |
| 6           | IPI00120451.1 | 14294 | GVSEIVHEGK             | 527.7807  | 2 | 49        | y8      | 58.1      | 107.1    |
| 7           | IPI00120451.1 | 14294 | GVSEIVHEGK             | 527.7807  | 2 | 54        | y5      | 57.1      | 111.1    |
| 8           | IPI00120451.1 | 14294 | GVSEIVHEGKK            | 394.8877  | 3 | 22        | y4      | 0.9       | 22.9     |
| 9           | IPI00120451.1 | 14294 | GVSEIVHEGKK            | 591.8280  | 2 | 48        | y4      | 28.0      | 76.0     |
| 10          | IPI00120451.1 | 14294 | GVSEIVHEGKK            | 591.8279  | 2 | 59        | y6      | 53.0      | 112.0    |
| 11          | IPI00120451.1 | 14294 | LTITYGPK               | 446.7610  | 2 | 30        | y5      | 69.8      | 99.8     |
| 12          | IPI00120451.1 | 14294 | LTITYGPK               | 446.7610  | 2 | 34        | y6      | 53.0      | 87.0     |
| 13          | IPI00120451.1 | 14294 | MNFSGK                 | 725.3350  | 1 | 23        |         | 0.0       | 23.0     |
| 14          | IPI00120451.1 | 14294 | MNFSGK                 | 725.3316  | 1 | 27        |         | 0.0       | 27.0     |
| 15          | IPI00120451.1 | 14294 | MVTTFK                 | 726.3856  | 1 | 19        |         | 0.0       | 19.0     |
| 16          | IPI00120451.1 | 14294 | MVTTFK                 | 726.3855  | 1 | 21        |         | 0.0       | 21.0     |
| 17          | IPI00120451.1 | 14294 | SVTELNQDTITNTMTLGDIVYK | 796.0665  | 3 | 15        |         | 0.0       | 15.0     |
| 18          | IPI00120451.1 | 14294 | SVTELNQDTITNTMTLGDIVYK | 796.0687  | 3 | 18        | y6      | 69.8      | 87.8     |
| 19          | IPI00120451.1 | 14294 | SVTELNQDTITNTMTLGDIVYK | 796.0687  | 3 | 22        |         | 0.0       | 22.0     |
| 20          | IPI00120451.1 | 14294 | SVTELNQDTITNTMTLGDIVYK | 1193.5906 | 2 | 24        | y6      | 27.2      | 51.2     |
| 21          | IPI00120451.1 | 14294 | SVTELNQDTITNTMTLGDIVYK | 796.3984  | 3 | 27        | y6      | 69.8      | 96.8     |
| 22          | IPI00120451.1 | 14294 | SVTELNQDTITNTMTLGDIVYK | 1193.5966 | 2 | 58        | y6      | 69.8      | 127.8    |
| 23          | IPI00120451.1 | 14294 | SVTELNQDTITNTMTLGDIVYK | 1193.5955 | 2 | 61        | y8      | 46.8      | 107.8    |
| 24          | IPI00120451.1 | 14294 | SVTELNQDTITNTMTLGDIVYK | 1194.0949 | 2 | 62        | y6      | 75.6      | 137.6    |
| 25          | IPI00120451.1 | 14294 | SVTELNQDTITNTMTLGDIVYK | 1194.0951 | 2 | 63        | y8      | 20.1      | 83.1     |
| 26          | IPI00120451.1 | 14294 | SVTELNQDTITNTMTLGDIVYK | 1193.5966 | 2 | 64        | y8      | 44.3      | 108.3    |
| 27          | IPI00120451.1 | 14294 | SVTELNQDTITNTMTLGDIVYK | 1193.5966 | 2 | 66        | y8      | 12.2      | 78.2     |
| 28          | IPI00120451.1 | 14294 | SVTELNQDTITNTMTLGDIVYK | 1194.0965 | 2 | 67        | y8      | 33.8      | 100.8    |
| 29          | IPI00120451.1 | 14294 | SVTELNQDTITNTMTLGDIVYK | 1193.5964 | 2 | 68        | y8      | 32.0      | 100.0    |
| 30          | IPI00120451.1 | 14294 | SVTELNQDTITNTMTLGDIVYK | 1193.5963 | 2 | 68        | y4      | 42.0      | 110.0    |
| 31          | IPI00120451.1 | 14294 | SVTELNQDTITNTMTLGDIVYK | 1194.0954 | 2 | 70        | y8      | 58.1      | 128.1    |
| 32          | IPI00120451.1 | 14294 | SVTELNQDTITNTMTLGDIVYK | 1193.5898 | 2 | 71        | y8      | 73.4      | 144.4    |
| 33          | IPI00120451.1 | 14294 | SVTELNQDTITNTMTLGDIVYK | 1193.5967 | 2 | 71        | y7      | 57.1      | 128.1    |
| 34          | IPI00120451.1 | 14294 | SVTELNQDTITNTMTLGDIVYK | 1193.5961 | 2 | 71        | y6      | 69.8      | 140.8    |
| 35          | IPI00120451.1 | 14294 | SVTELNQDTITNTMTLGDIVYK | 1193.5959 | 2 | 71        | y8      | 32.0      | 103.0    |
| 36          | IPI00120451.1 | 14294 | SVTELNQDTITNTMTLGDIVYK | 1193.5952 | 2 | 71        | y8      | 21.2      | 92.2     |
| 37          | IPI00120451.1 | 14294 | SVTELNQDTITNTMTLGDIVYK | 1193.5969 | 2 | 72        |         | 0.0       | 72.0     |
| 38          | IPI00120451.1 | 14294 | SVTELNQDTITNTMTLGDIVYK | 1193.5964 | 2 | 72        | y8      | 33.8      | 105.8    |

|    |               |       |                        |           |   |    |    |      |       |
|----|---------------|-------|------------------------|-----------|---|----|----|------|-------|
| 39 | IPI00120451.1 | 14294 | SVTELNQDTITNTMTLGDIVYK | 1193.5963 | 2 | 72 | y8 | 33.8 | 105.8 |
| 40 | IPI00120451.1 | 14294 | SVTELNQDTITNTMTLGDIVYK | 1193.5961 | 2 | 72 | y6 | 69.8 | 141.8 |
| 41 | IPI00120451.1 | 14294 | SVTELNQDTITNTMTLGDIVYK | 1193.5963 | 2 | 73 | y8 | 12.9 | 85.9  |
| 42 | IPI00120451.1 | 14294 | SVTELNQDTITNTMTLGDIVYK | 1193.5961 | 2 | 73 | y8 | 44.3 | 117.3 |
| 43 | IPI00120451.1 | 14294 | SVTELNQDTITNTMTLGDIVYK | 1193.5959 | 2 | 73 | y8 | 61.4 | 134.4 |
| 44 | IPI00120451.1 | 14294 | SVTELNQDTITNTMTLGDIVYK | 1194.0951 | 2 | 74 | y8 | 30.4 | 104.4 |
| 45 | IPI00120451.1 | 14294 | SVTELNQDTITNTMTLGDIVYK | 1193.5954 | 2 | 74 | y8 | 58.1 | 132.1 |
| 46 | IPI00120451.1 | 14294 | SVTELNQDTITNTMTLGDIVYK | 1193.5960 | 2 | 75 | y8 | 33.8 | 108.8 |
| 47 | IPI00120451.1 | 14294 | SVTELNQDTITNTMTLGDIVYK | 1193.5953 | 2 | 75 | y8 | 44.3 | 119.3 |
| 48 | IPI00120451.1 | 14294 | SVTELNQDTITNTMTLGDIVYK | 1193.5973 | 2 | 76 | y8 | 33.8 | 109.8 |
| 49 | IPI00120451.1 | 14294 | SVTELNQDTITNTMTLGDIVYK | 1193.5969 | 2 | 76 |    | 0.0  | 76.0  |
| 50 | IPI00120451.1 | 14294 | SVTELNQDTITNTMTLGDIVYK | 1193.5967 | 2 | 77 | y6 | 57.1 | 134.1 |
| 51 | IPI00120451.1 | 14294 | SVTELNQDTITNTMTLGDIVYK | 1193.5951 | 2 | 77 | y8 | 55.3 | 132.3 |
| 52 | IPI00120451.1 | 14294 | SVTELNQDTITNTMTLGDIVYK | 1193.5968 | 2 | 78 | y8 | 55.3 | 133.3 |
| 53 | IPI00120451.1 | 14294 | SVTELNQDTITNTMTLGDIVYK | 1193.5964 | 2 | 78 | y8 | 12.2 | 90.2  |
| 54 | IPI00120451.1 | 14294 | SVTELNQDTITNTMTLGDIVYK | 1193.5964 | 2 | 78 | y6 | 53.0 | 131.0 |
| 55 | IPI00120451.1 | 14294 | SVTELNQDTITNTMTLGDIVYK | 1193.5963 | 2 | 78 | y8 | 32.0 | 110.0 |
| 56 | IPI00120451.1 | 14294 | SVTELNQDTITNTMTLGDIVYK | 1193.5962 | 2 | 78 |    | 0.0  | 78.0  |
| 57 | IPI00120451.1 | 14294 | SVTELNQDTITNTMTLGDIVYK | 1193.5961 | 2 | 78 | y8 | 22.4 | 100.4 |
| 58 | IPI00120451.1 | 14294 | SVTELNQDTITNTMTLGDIVYK | 1193.5965 | 2 | 79 | y8 | 30.4 | 109.4 |
| 59 | IPI00120451.1 | 14294 | SVTELNQDTITNTMTLGDIVYK | 1193.5960 | 2 | 79 | y6 | 89.0 | 168.0 |
| 60 | IPI00120451.1 | 14294 | SVTELNQDTITNTMTLGDIVYK | 1193.5958 | 2 | 79 | y8 | 22.4 | 101.4 |
| 61 | IPI00120451.1 | 14294 | SVTELNQDTITNTMTLGDIVYK | 1193.5966 | 2 | 80 | y8 | 20.1 | 100.1 |
| 62 | IPI00120451.1 | 14294 | SVTELNQDTITNTMTLGDIVYK | 1193.5964 | 2 | 80 | y8 | 55.3 | 135.3 |
| 63 | IPI00120451.1 | 14294 | SVTELNQDTITNTMTLGDIVYK | 1193.5962 | 2 | 80 |    | 0.0  | 80.0  |
| 64 | IPI00120451.1 | 14294 | SVTELNQDTITNTMTLGDIVYK | 1193.5956 | 2 | 80 | y8 | 73.4 | 153.4 |
| 65 | IPI00120451.1 | 14294 | SVTELNQDTITNTMTLGDIVYK | 1193.5952 | 2 | 80 | y8 | 32.0 | 112.0 |
| 66 | IPI00120451.1 | 14294 | SVTELNQDTITNTMTLGDIVYK | 1193.5965 | 2 | 81 | y8 | 32.0 | 113.0 |
| 67 | IPI00120451.1 | 14294 | SVTELNQDTITNTMTLGDIVYK | 1193.5964 | 2 | 81 | y8 | 30.4 | 111.4 |
| 68 | IPI00120451.1 | 14294 | SVTELNQDTITNTMTLGDIVYK | 1193.5964 | 2 | 81 | y6 | 69.8 | 150.8 |
| 69 | IPI00120451.1 | 14294 | SVTELNQDTITNTMTLGDIVYK | 1193.5967 | 2 | 82 | y7 | 46.8 | 128.8 |
| 70 | IPI00120451.1 | 14294 | SVTELNQDTITNTMTLGDIVYK | 1193.5966 | 2 | 83 | y6 | 69.8 | 152.8 |
| 71 | IPI00120451.1 | 14294 | SVTELNQDTITNTMTLGDIVYK | 1193.5963 | 2 | 83 | y8 | 44.3 | 127.3 |
| 72 | IPI00120451.1 | 14294 | SVTELNQDTITNTMTLGDIVYK | 1193.5960 | 2 | 83 | y8 | 32.0 | 115.0 |
| 73 | IPI00120451.1 | 14294 | SVTELNQDTITNTMTLGDIVYK | 1193.5957 | 2 | 83 |    | 0.0  | 83.0  |
| 74 | IPI00120451.1 | 14294 | SVTELNQDTITNTMTLGDIVYK | 1193.5950 | 2 | 83 | y8 | 32.0 | 115.0 |
| 75 | IPI00120451.1 | 14294 | SVTELNQDTITNTMTLGDIVYK | 1193.5943 | 2 | 83 | y8 | 77.6 | 160.6 |
| 76 | IPI00120451.1 | 14294 | SVTELNQDTITNTMTLGDIVYK | 1193.5951 | 2 | 84 | y7 | 35.8 | 119.8 |
| 77 | IPI00120451.1 | 14294 | SVTELNQDTITNTMTLGDIVYK | 1193.5964 | 2 | 85 | y8 | 55.3 | 140.3 |
| 78 | IPI00120451.1 | 14294 | SVTELNQDTITNTMTLGDIVYK | 1193.5964 | 2 | 85 | y8 | 33.8 | 118.8 |
| 79 | IPI00120451.1 | 14294 | SVTELNQDTITNTMTLGDIVYK | 1194.0945 | 2 | 86 | y8 | 42.2 | 128.2 |

|     |               |       |                       |           |   |     |         |      |       |
|-----|---------------|-------|-----------------------|-----------|---|-----|---------|------|-------|
| 80  | IPI00120451.1 | 14294 | SVTELNQDITNTMTLGDIVYK | 1193.5961 | 2 | 86  | y8      | 46.8 | 132.8 |
| 81  | IPI00120451.1 | 14294 | SVTELNQDITNTMTLGDIVYK | 1193.5956 | 2 | 86  | y4      | 18.5 | 104.5 |
| 82  | IPI00120451.1 | 14294 | SVTELNQDITNTMTLGDIVYK | 1193.5954 | 2 | 88  | y6      | 57.1 | 145.1 |
| 83  | IPI00120451.1 | 14294 | SVTELNQDITNTMTLGDIVYK | 1193.5963 | 2 | 89  | y8      | 33.8 | 122.8 |
| 84  | IPI00120451.1 | 14294 | SVTELNQDITNTMTLGDIVYK | 1193.5955 | 2 | 89  | y6      | 69.8 | 158.8 |
| 85  | IPI00120451.1 | 14294 | SVTELNQDITNTMTLGDIVYK | 1193.5955 | 2 | 90  | y8      | 46.8 | 136.8 |
| 86  | IPI00120451.1 | 14294 | SVTELNQDITNTMTLGDIVYK | 1194.0950 | 2 | 91  |         | 0.0  | 91.0  |
| 87  | IPI00120451.1 | 14294 | SVTELNQDITNTMTLGDIVYK | 1193.5952 | 2 | 91  | y8      | 32.0 | 123.0 |
| 88  | IPI00120451.1 | 14294 | SVTELNQDITNTMTLGDIVYK | 1193.5964 | 2 | 94  | y8      | 58.1 | 152.1 |
| 89  | IPI00120451.1 | 14294 | SVTELNQDITNTMTLGDIVYK | 1193.5963 | 2 | 94  | y8      | 42.2 | 136.2 |
| 90  | IPI00120451.1 | 14294 | SVTELNQDITNTMTLGDIVYK | 1193.5962 | 2 | 94  | y8      | 21.2 | 115.2 |
| 91  | IPI00120451.1 | 14294 | SVTELNQDITNTMTLGDIVYK | 1193.5960 | 2 | 94  | y6      | 53.0 | 147.0 |
| 92  | IPI00120451.1 | 14294 | SVTELNQDITNTMTLGDIVYK | 1193.5960 | 2 | 94  | y8      | 44.3 | 138.3 |
| 93  | IPI00120451.1 | 14294 | SVTELNQDITNTMTLGDIVYK | 1193.5958 | 2 | 94  | y8      | 33.8 | 127.8 |
| 94  | IPI00120451.1 | 14294 | SVTELNQDITNTMTLGDIVYK | 1193.5957 | 2 | 94  | y8      | 42.2 | 136.2 |
| 95  | IPI00120451.1 | 14294 | SVTELNQDITNTMTLGDIVYK | 1193.5954 | 2 | 94  | y8      | 33.8 | 127.8 |
| 96  | IPI00120451.1 | 14294 | SVTELNQDITNTMTLGDIVYK | 1193.5957 | 2 | 95  | y8      | 21.2 | 116.2 |
| 97  | IPI00120451.1 | 14294 | SVTELNQDITNTMTLGDIVYK | 1193.5947 | 2 | 95  |         | 0.0  | 95.0  |
| 98  | IPI00120451.1 | 14294 | SVTELNQDITNTMTLGDIVYK | 1193.5966 | 2 | 96  | y8      | 46.8 | 142.8 |
| 99  | IPI00120451.1 | 14294 | SVTELNQDITNTMTLGDIVYK | 1193.5955 | 2 | 97  | y7      | 46.8 | 143.8 |
| 100 | IPI00120451.1 | 14294 | SVTELNQDITNTMTLGDIVYK | 1193.5960 | 2 | 111 | y8      | 32.0 | 143.0 |
| 101 | IPI00120451.1 | 14294 | SVTELNQDITNTMTLGDIVYK | 1193.5958 | 2 | 111 | y8      | 46.8 | 157.8 |
| 102 | IPI00120451.1 | 14294 | SVTELNQDITNTMTLGDIVYK | 1193.5958 | 2 | 111 | y8      | 33.8 | 144.8 |
| 103 | IPI00120451.1 | 14294 | SVTELNQDITNTMTLGDIVYK | 1193.5962 | 2 | 135 |         | 0.0  | 135.0 |
| 104 | IPI00120451.1 | 14294 | YQLSQENFEPFMK         | 894.9162  | 2 | 42  | y5      | 29.5 | 71.5  |
| 105 | IPI00120451.1 | 14294 | YQLSQENFEPFMK         | 895.4200  | 2 | 49  |         | 0.0  | 49.0  |
| 106 | IPI00120451.1 | 14294 | YQLSQENFEPFMK         | 903.4181  | 2 | 52  |         | 0.0  | 52.0  |
| 107 | IPI00120451.1 | 14294 | YQLSQENFEPFMK         | 894.9161  | 2 | 55  | P y4    | 62.3 | 117.3 |
| 108 | IPI00120451.1 | 14294 | YQLSQENFEPFMK         | 895.4165  | 2 | 57  | P y4    | 62.3 | 119.3 |
| 109 | IPI00120451.1 | 14294 | YQLSQENFEPFMK         | 895.4201  | 2 | 62  | P y4    | 62.3 | 124.3 |
| 110 | IPI00120451.1 | 14294 | YQLSQENFEPFMK         | 894.9161  | 2 | 65  | P y4    | 44.5 | 109.5 |
| 111 | IPI00120451.1 | 14294 | YQLSQENFEPFMK         | 895.4199  | 2 | 67  | P y4    | 62.3 | 129.3 |
| 112 | IPI00120451.1 | 14294 | YQLSQENFEPFMK         | 895.4155  | 2 | 69  | P y4    | 44.5 | 113.5 |
| 113 | IPI00120451.1 | 14294 | YQLSQENFEPFMK         | 895.4166  | 2 | 82  |         | 0.0  | 82.0  |
| 114 | IPI00283531.4 | 25653 | AFLSSPEHVNRPINGNGK    | 646.6683  | 3 | 21  |         | 0.0  | 21.0  |
| 115 | IPI00283531.4 | 25653 | AFLSSPEHVNRPINGNGK    | 646.3373  | 3 | 23  |         | 0.0  | 23.0  |
| 116 | IPI00283531.4 | 25653 | AFLSSPEHVNRPINGNGKQ   | 689.3531  | 3 | 16  | y5      | 16.9 | 32.9  |
| 117 | IPI00283531.4 | 25653 | AFLSSPEHVNRPINGNGKQ   | 689.0278  | 3 | 17  | P y++14 | 10.1 | 27.1  |
| 118 | IPI00283531.4 | 25653 | AFLSSPEHVNRPINGNGKQ   | 689.6814  | 3 | 17  |         | 0.0  | 17.0  |
| 119 | IPI00283531.4 | 25653 | AFLSSPEHVNRPINGNGKQ   | 689.3530  | 3 | 18  |         | 0.0  | 18.0  |
| 120 | IPI00283531.4 | 25653 | AFLSSPEHVNRPINGNGKQ   | 689.6874  | 3 | 22  |         | 0.0  | 22.0  |

|     |               |       |                      |           |   |    |         |      |       |
|-----|---------------|-------|----------------------|-----------|---|----|---------|------|-------|
| 121 | IPI00283531.4 | 25653 | AFLSSPEHVNRPINGNGKQ  | 689.3590  | 3 | 22 | y++15   | 5.0  | 27.0  |
| 122 | IPI00283531.4 | 25653 | AFLSSPEHVNRPINGNGKQ  | 689.3557  | 3 | 22 |         | 0.0  | 22.0  |
| 123 | IPI00283531.4 | 25653 | AFLSSPEHVNRPINGNGKQ  | 689.6874  | 3 | 26 | y5      | 18.5 | 44.5  |
| 124 | IPI00283531.4 | 25653 | AFLSSPEHVNRPINGNGKQ  | 689.3591  | 3 | 32 |         | 0.0  | 32.0  |
| 125 | IPI00283531.4 | 25653 | AFLSSPEHVNRPINGNGKQ  | 1034.0237 | 2 | 39 |         | 0.0  | 39.0  |
| 126 | IPI00283531.4 | 25653 | AFLSSPEHVNRPINGNGKQ  | 1033.5317 | 2 | 44 | P y++14 | 4.7  | 48.7  |
| 127 | IPI00283531.4 | 25653 | AFLSSPEHVNRPINGNGKQ  | 1034.0238 | 2 | 47 | y5      | 7.1  | 54.1  |
| 128 | IPI00283531.4 | 25653 | AFLSSPEHVNRPINGNGKQ  | 1034.0237 | 2 | 50 |         | 0.0  | 50.0  |
| 129 | IPI00283531.4 | 25653 | AFLSSPEHVNRPINGNGKQ  | 1034.5158 | 2 | 52 |         | 0.0  | 52.0  |
| 130 | IPI00283531.4 | 25653 | ALPGHLKPFETLLSQNQGGK | 534.5459  | 4 | 15 | y7      | 82.7 | 97.7  |
| 131 | IPI00283531.4 | 25653 | ALPGHLKPFETLLSQNQGGK | 534.5459  | 4 | 16 | y6      | 23.8 | 39.8  |
| 132 | IPI00283531.4 | 25653 | ALPGHLKPFETLLSQNQGGK | 534.7968  | 4 | 17 | y7      | 35.8 | 52.8  |
| 133 | IPI00283531.4 | 25653 | ALPGHLKPFETLLSQNQGGK | 534.5459  | 4 | 17 |         | 0.0  | 17.0  |
| 134 | IPI00283531.4 | 25653 | ALPGHLKPFETLLSQNQGGK | 534.7968  | 4 | 20 | y7      | 53.0 | 73.0  |
| 135 | IPI00283531.4 | 25653 | ALPGHLKPFETLLSQNQGGK | 534.7969  | 4 | 27 | y5      | 53.0 | 80.0  |
| 136 | IPI00283531.4 | 25653 | ALPGHLKPFETLLSQNQGGK | 1068.5847 | 2 | 29 | c b6    | 27.2 | 56.2  |
| 137 | IPI00283531.4 | 25653 | ALPGHLKPFETLLSQNQGGK | 712.7286  | 3 | 33 | y8      | 90.2 | 123.2 |
| 138 | IPI00283531.4 | 25653 | ALPGHLKPFETLLSQNQGGK | 712.7286  | 3 | 35 | y8      | 58.1 | 93.1  |
| 139 | IPI00283531.4 | 25653 | ALPGHLKPFETLLSQNQGGK | 1068.5850 | 2 | 43 | y7      | 1.4  | 44.4  |
| 140 | IPI00283531.4 | 25653 | ALPGHLKPFETLLSQNQGGK | 1068.5851 | 2 | 44 | y7      | 23.8 | 67.8  |
| 141 | IPI00283531.4 | 25653 | ALPGHLKPFETLLSQNQGGK | 1068.5849 | 2 | 45 | c b6    | 14.6 | 59.6  |
| 142 | IPI00283531.4 | 25653 | ALPGHLKPFETLLSQNQGGK | 1068.5850 | 2 | 49 | c b6    | 35.8 | 84.8  |
| 143 | IPI00283531.4 | 25653 | ALPGHLKPFETLLSQNQGGK | 1068.5850 | 2 | 53 |         | 0.0  | 53.0  |
| 144 | IPI00283531.4 | 25653 | EAAQMDMVNDGVEDLR     | 896.8988  | 2 | 97 | y6      | 25.4 | 122.4 |
| 145 | IPI00283531.4 | 25653 | EAAQMDMVNDGVEDLRGK   | 659.9717  | 3 | 37 |         | 0.0  | 37.0  |
| 146 | IPI00283531.4 | 25653 | EAAQMDMVNDGVEDLRGK   | 659.9718  | 3 | 40 |         | 0.0  | 40.0  |
| 147 | IPI00283531.4 | 25653 | EAAQMDMVNDGVEDLRGK   | 659.9717  | 3 | 44 |         | 0.0  | 44.0  |
| 148 | IPI00283531.4 | 25653 | EAAQMDMVNDGVEDLRGK   | 989.9541  | 2 | 51 | y8      | 46.8 | 97.8  |
| 149 | IPI00283531.4 | 25653 | EAAQMDMVNDGVEDLRGK   | 989.9548  | 2 | 52 | y8      | 32.0 | 84.0  |
| 150 | IPI00283531.4 | 25653 | EAAQMDMVNDGVEDLRGK   | 989.9548  | 2 | 68 | y8      | 33.8 | 101.8 |
| 151 | IPI00283531.4 | 25653 | FEDGDLTLYQSNAILR     | 928.4668  | 2 | 25 | y8      | 11.0 | 36.0  |
| 152 | IPI00283531.4 | 25653 | FEDGDLTLYQSNAILR     | 619.3141  | 3 | 40 | c b8    | 11.6 | 51.6  |
| 153 | IPI00283531.4 | 25653 | FEDGDLTLYQSNAILR     | 928.4670  | 2 | 65 | y6      | 23.8 | 88.8  |
| 154 | IPI00283531.4 | 25653 | FEDGDLTLYQSNAILR     | 928.4664  | 2 | 65 | y8      | 19.2 | 84.2  |
| 155 | IPI00283531.4 | 25653 | FEDGDLTLYQSNAILR     | 928.4672  | 2 | 69 | y7      | 12.9 | 81.9  |
| 156 | IPI00283531.4 | 25653 | FEDGDLTLYQSNAILR     | 927.9657  | 2 | 70 | y6      | 27.2 | 97.2  |
| 157 | IPI00283531.4 | 25653 | FEDGDLTLYQSNAILR     | 928.4664  | 2 | 71 | y8      | 19.2 | 90.2  |
| 158 | IPI00283531.4 | 25653 | FEDGDLTLYQSNAILR     | 928.4671  | 2 | 72 | y7      | 46.8 | 118.8 |
| 159 | IPI00283531.4 | 25653 | FEDGDLTLYQSNAILR     | 928.4667  | 2 | 72 | y8      | 19.2 | 91.2  |
| 160 | IPI00283531.4 | 25653 | FEDGDLTLYQSNAILR     | 928.4707  | 2 | 75 | y8      | 29.0 | 104.0 |
| 161 | IPI00283531.4 | 25653 | FEDGDLTLYQSNAILR     | 928.4669  | 2 | 75 | c b8    | 44.3 | 119.3 |

|     |               |       |                                       |           |   |    |         |      |       |
|-----|---------------|-------|---------------------------------------|-----------|---|----|---------|------|-------|
| 162 | IPI00283531.4 | 25653 | FEDGDLTLYQSNAILR                      | 927.9657  | 2 | 78 | y8      | 33.8 | 111.8 |
| 163 | IPI00283531.4 | 25653 | FEDGDLTLYQSNAILR                      | 928.4671  | 2 | 91 | y8      | 30.4 | 121.4 |
| 164 | IPI00283531.4 | 25653 | FEDGDLTLYQSNAILR                      | 927.9658  | 2 | 92 |         | 0.0  | 92.0  |
| 165 | IPI00283531.4 | 25653 | FEDGDLTLYQSNAILR                      | 927.9656  | 2 | 96 | y6      | 35.8 | 131.8 |
| 166 | IPI00283531.4 | 25653 | LSARPK                                | 336.2137  | 2 | 24 | y5      | 16.9 | 40.9  |
| 167 | IPI00283531.4 | 25653 | MLLADQGGQSWK                          | 638.8205  | 2 | 47 | y8      | 55.3 | 102.3 |
| 168 | IPI00283531.4 | 25653 | MLLADQGGQSWKEEVVTIDTWMQGLLK           | 756.1373  | 4 | 32 |         | 0.0  | 32.0  |
| 169 | IPI00283531.4 | 25653 | MLLADQGGQSWKEEVVTIDTWMQGLLK           | 756.1395  | 4 | 35 |         | 0.0  | 35.0  |
| 170 | IPI00283531.4 | 25653 | MLLADQGGQSWKEEVVTIDTWMQGLLK           | 1007.5187 | 3 | 51 | y4      | 16.9 | 67.9  |
| 171 | IPI00283531.4 | 25653 | MLLADQGGQSWKEEVVTIDTWMQGLLK           | 1007.5190 | 3 | 58 | y7      | 23.8 | 81.8  |
| 172 | IPI00283531.4 | 25653 | MLLADQGGQSWKEEVVTIDTWMQGLLKPTCLYGQLPK | 1045.5368 | 4 | 53 | y++16   | 14.9 | 67.9  |
| 173 | IPI00283531.4 | 25653 | NQREAAQMDMVNDGVEDLRGK                 | 793.0375  | 3 | 52 | y4      | 7.7  | 59.7  |
| 174 | IPI00283531.4 | 25653 | NQREAAQMDMVNDGVEDLRGK                 | 793.0398  | 3 | 54 | y8      | 33.8 | 87.8  |
| 175 | IPI00283531.4 | 25653 | PFETLLSQNQQGK                         | 709.8715  | 2 | 82 | y8      | 12.9 | 94.9  |
| 176 | IPI00283531.4 | 25653 | SLGLYGK                               | 369.2132  | 2 | 16 | y5      | 41.0 | 57.0  |
| 177 | IPI00283531.4 | 25653 | SLGLYGK                               | 737.4191  | 1 | 20 |         | 0.0  | 20.0  |
| 178 | IPI00283531.4 | 25653 | SLGLYGK                               | 369.2132  | 2 | 21 | y5      | 41.0 | 62.0  |
| 179 | IPI00283531.4 | 25653 | SLGLYGK                               | 737.4214  | 1 | 27 |         | 0.0  | 27.0  |
| 180 | IPI00283531.4 | 25653 | YVTLIYTNYENGK                         | 789.3951  | 2 | 17 | y8      | 73.4 | 90.4  |
| 181 | IPI00283531.4 | 25653 | YVTLIYTNYENGK                         | 789.8864  | 2 | 21 |         | 0.0  | 21.0  |
| 182 | IPI00283531.4 | 25653 | YVTLIYTNYENGK                         | 789.8862  | 2 | 36 |         | 0.0  | 36.0  |
| 183 | IPI00283531.4 | 25653 | YVTLIYTNYENGKNDYVK                    | 733.3661  | 3 | 23 |         | 0.0  | 23.0  |
| 184 | IPI00283531.4 | 25653 | YVTLIYTNYENGKNDYVK                    | 733.3661  | 3 | 25 | b5      | 27.2 | 52.2  |
| 185 | IPI00283531.4 | 25653 | YVTLIYTNYENGKNDYVK                    | 733.6947  | 3 | 50 |         | 0.0  | 50.0  |
| 186 | IPI00283531.4 | 25653 | YVTLIYTNYENGKNDYVK                    | 1100.0393 | 2 | 59 | y7      | 35.8 | 94.8  |
| 187 | IPI00283531.4 | 25653 | YVTLIYTNYENGKNDYVK                    | 1099.5481 | 2 | 79 | y7      | 25.4 | 104.4 |
| 188 | IPI00323816.2 | 56229 | DGFNPAHVEAGLYGSR                      | 563.9383  | 3 | 45 | y4      | 38.2 | 83.2  |
| 189 | IPI00323816.2 | 56229 | GSFVLLDGETFEVK                        | 770.8984  | 2 | 36 | y8      | 32.0 | 68.0  |
| 190 | IPI00323816.2 | 56229 | GTWEKPGGASPMGYDFWYQPR                 | 811.0382  | 3 | 26 | y4      | 15.6 | 41.6  |
| 191 | IPI00323816.2 | 56229 | GTWEKPGGASPMGYDFWYQPR                 | 811.0382  | 3 | 32 | c b10 P | 18.3 | 50.3  |
| 192 | IPI00323816.2 | 56229 | HEIIQTLQMTDGLIPLEIR                   | 741.0743  | 3 | 34 | b6      | 1.4  | 35.4  |
| 193 | IPI00323816.2 | 56229 | HEIIQTLQMTDGLIPLEIR                   | 1111.1101 | 2 | 59 | y8      | 21.2 | 80.2  |
| 194 | IPI00323816.2 | 56229 | HNVMVSTEWAAAPNVFK                     | 610.6380  | 3 | 20 | y6      | 69.8 | 89.8  |
| 195 | IPI00323816.2 | 56229 | HNVMVSTEWAAAPNVFK                     | 915.9563  | 2 | 63 | c b8    | 5.4  | 68.4  |
| 196 | IPI00323816.2 | 56229 | HNVMVSTEWAAAPNVFK                     | 915.4540  | 2 | 80 | P y5    | 62.3 | 142.3 |
| 197 | IPI00323816.2 | 56229 | HNVMVSTEWAAAPNVFK                     | 915.9530  | 2 | 90 | c b8    | 22.4 | 112.4 |
| 198 | IPI00323816.2 | 56229 | IFVWDWQR                              | 575.2971  | 2 | 33 | y6      | 49.6 | 82.6  |
| 199 | IPI00323816.2 | 56229 | IFVWDWQR                              | 575.2954  | 2 | 37 | y6      | 65.2 | 102.2 |
| 200 | IPI00323816.2 | 56229 | IYVVDVGSEPR                           | 617.3288  | 2 | 64 | y9      | 27.7 | 91.7  |
| 201 | IPI00323816.2 | 56229 | IYVVDVGSEPR                           | 617.3288  | 2 | 66 | y5      | 29.5 | 95.5  |
| 202 | IPI00323816.2 | 56229 | IYVVDVGSEPR                           | 617.3287  | 2 | 71 | y5      | 41.0 | 112.0 |

|     |               |        |                         |          |   |    |      |      |       |
|-----|---------------|--------|-------------------------|----------|---|----|------|------|-------|
| 203 | IPI00323816.2 | 56229  | LILPGLMSSR              | 543.8204 | 2 | 40 | P y7 | 61.4 | 101.4 |
| 204 | IPI00323816.2 | 56229  | LNPNFLVDFGKEPLGPALAEHLR | 850.1289 | 3 | 37 | P y8 | 30.4 | 67.4  |
| 205 | IPI00323816.2 | 56229  | LNPNFLVDFGKEPLGPALAEHLR | 850.1288 | 3 | 43 | P y8 | 33.8 | 76.8  |
| 206 | IPI00323816.2 | 56229  | LNPNFLVDFGKEPLGPALAEHLR | 850.1318 | 3 | 53 |      | 0.0  | 53.0  |
| 207 | IPI00323816.2 | 56229  | LPMPYLK                 | 431.2486 | 2 | 21 | P y6 | 38.2 | 59.2  |
| 208 | IPI00323816.2 | 56229  | LPMPYLK                 | 431.2494 | 2 | 25 | P y6 | 69.8 | 94.8  |
| 209 | IPI00323816.2 | 56229  | NEEGTWSVEK              | 589.7704 | 2 | 35 | y7   | 22.4 | 57.4  |
| 210 | IPI00323816.2 | 56229  | NEEGTWSVEK              | 589.7705 | 2 | 36 | y8   | 58.1 | 94.1  |
| 211 | IPI00323816.2 | 56229  | NTGTEAPDYLATVDVDPK      | 953.9603 | 2 | 59 | y5   | 14.6 | 73.6  |
| 212 | IPI00323816.2 | 56229  | NTGTEAPDYLATVDVDPK      | 953.9604 | 2 | 60 |      | 0.0  | 60.0  |
| 213 | IPI00323816.2 | 56229  | NTGTEAPDYLATVDVDPK      | 953.9602 | 2 | 72 |      | 0.0  | 72.0  |
| 214 | IPI00323816.2 | 56229  | NTGTEAPDYLATVDVDPK      | 953.9602 | 2 | 75 |      | 0.0  | 75.0  |
| 215 | IPI00323816.2 | 56229  | PGGASPMGYDFWYQPR        | 915.4128 | 2 | 55 | y4   | 29.5 | 84.5  |
| 216 | IPI00323816.2 | 56229  | PGGASPMGYDFWYQPR        | 915.4095 | 2 | 56 |      | 0.0  | 56.0  |
| 217 | IPI00323816.2 | 56229  | PGGASPMGYDFWYQPR        | 915.4094 | 2 | 68 | y6   | 33.8 | 101.8 |
| 218 | IPI00323816.2 | 56229  | PGGASPMGYDFWYQPR        | 914.9068 | 2 | 99 | y6   | 46.8 | 145.8 |
| 219 | IPI00323816.2 | 56229  | QFYPLIR                 | 526.2830 | 2 | 27 | P y5 | 65.2 | 92.2  |
| 220 | IPI00323816.2 | 56229  | QYDISNPQK               | 546.7707 | 2 | 34 | y5   | 15.6 | 49.6  |
| 221 | IPI00323816.2 | 56229  | QYDISNPQKPR             | 449.2342 | 3 | 17 |      | 0.0  | 17.0  |
| 222 | IPI00323816.2 | 56229  | QYDISNPQKPR             | 673.3469 | 2 | 41 | P y5 | 38.2 | 79.2  |
| 223 | IPI00323816.2 | 56229  | RIPGGPQMIQLSLDGK        | 570.6546 | 3 | 33 | y7   | 14.6 | 47.6  |
| 224 | IPI00323816.2 | 56229  | RIPGGPQMIQLSLDGK        | 570.6510 | 3 | 50 | y5   | 38.2 | 88.2  |
| 225 | IPI00323816.2 | 56229  | RIPGGPQMIQLSLDGK        | 855.4728 | 2 | 72 | b8   | 19.2 | 91.2  |
| 226 | IPI00323816.2 | 56229  | SPQYSQVIHR              | 405.5477 | 3 | 50 | y4   | 27.2 | 77.2  |
| 227 | IPI00323816.2 | 56229  | SPQYSQVIHR              | 607.8179 | 2 | 61 |      | 0.0  | 61.0  |
| 228 | IPI00323816.2 | 56229  | VIQVPSKK                | 449.7900 | 2 | 20 | P y4 | 49.1 | 69.1  |
| 229 | IPI00153317.2 | 100088 | ADPLGLEAEK              | 521.7748 | 2 | 37 | P y8 | 58.1 | 95.1  |
| 230 | IPI00153317.2 | 100088 | AGLILFGNDDR             | 595.8141 | 2 | 39 | y6   | 38.2 | 77.2  |
| 231 | IPI00153317.2 | 100088 | ALYVSDK                 | 398.2164 | 2 | 22 | y5   | 89.0 | 111.0 |
| 232 | IPI00153317.2 | 100088 | ALYVSDK                 | 795.4279 | 1 | 23 | c b4 | 16.9 | 39.9  |
| 233 | IPI00153317.2 | 100088 | ANATEFGLASGVFTR         | 770.8915 | 2 | 17 | y5   | 15.6 | 32.6  |
| 234 | IPI00153317.2 | 100088 | ANATEFGLASGVFTR         | 514.2641 | 3 | 49 |      | 0.0  | 49.0  |
| 235 | IPI00153317.2 | 100088 | ANATEFGLASGVFTR         | 771.3925 | 2 | 60 | y5   | 27.2 | 87.2  |
| 236 | IPI00153317.2 | 100088 | ARGQALPEVVAK            | 413.5786 | 3 | 16 | P y6 | 95.7 | 111.7 |
| 237 | IPI00153317.2 | 100088 | ARGQALPEVVAK            | 619.8653 | 2 | 42 | c b8 | 21.2 | 63.2  |
| 238 | IPI00153317.2 | 100088 | AVQMGMSVFFNK            | 723.8502 | 2 | 43 | y4   | 44.5 | 87.5  |
| 239 | IPI00153317.2 | 100088 | AVQMGMSVFFNK            | 723.3489 | 2 | 49 |      | 0.0  | 49.0  |
| 240 | IPI00153317.2 | 100088 | DGVPVFK                 | 381.2133 | 2 | 19 |      | 0.0  | 19.0  |
| 241 | IPI00153317.2 | 100088 | DGVPVFK                 | 761.4246 | 1 | 27 |      | 0.0  | 27.0  |
| 242 | IPI00153317.2 | 100088 | DLGEAALNEYLR            | 682.3543 | 2 | 69 | y7   | 23.8 | 92.8  |
| 243 | IPI00153317.2 | 100088 | EAFENLWGK               | 575.7808 | 2 | 25 |      | 0.0  | 25.0  |

|     |               |        |                               |           |   |    |        |      |       |
|-----|---------------|--------|-------------------------------|-----------|---|----|--------|------|-------|
| 244 | IPI00153317.2 | 100088 | EGHEVGVFTIPDK                 | 509.5997  | 3 | 25 | y6     | 61.4 | 86.4  |
| 245 | IPI00153317.2 | 100088 | EGHEVGVFTIPDKDGK              | 609.6493  | 3 | 15 | P y6   | 62.3 | 77.3  |
| 246 | IPI00153317.2 | 100088 | ETAMINWDQPAEAIHNWIR           | 766.0370  | 3 | 15 |        | 0.0  | 15.0  |
| 247 | IPI00153317.2 | 100088 | ETAMINWDQPAEAIHNWIR           | 766.0395  | 3 | 31 |        | 0.0  | 31.0  |
| 248 | IPI00153317.2 | 100088 | ETAMINWDQPAEAIHNWIR           | 1148.5544 | 2 | 47 | y7     | 5.6  | 52.6  |
| 249 | IPI00153317.2 | 100088 | FADGDVDAVLSR                  | 632.8124  | 2 | 68 |        | 0.0  | 68.0  |
| 250 | IPI00153317.2 | 100088 | FAELTLK                       | 411.2424  | 2 | 33 | y6     | 69.8 | 102.8 |
| 251 | IPI00153317.2 | 100088 | FLFPEGIK                      | 475.7714  | 2 | 25 | y6     | 61.4 | 86.4  |
| 252 | IPI00153317.2 | 100088 | GMVQAVR                       | 380.7104  | 2 | 26 | y5     | 49.6 | 75.6  |
| 253 | IPI00153317.2 | 100088 | GQALPEVVAK                    | 506.2953  | 2 | 23 | P y6   | 95.7 | 118.7 |
| 254 | IPI00153317.2 | 100088 | GVVNILPGSGSLVGQR              | 518.2982  | 3 | 48 | y4     | 44.5 | 92.5  |
| 255 | IPI00153317.2 | 100088 | HGSIIYHPSLLPR                 | 497.2806  | 3 | 30 | P y6   | 53.0 | 83.0  |
| 256 | IPI00153317.2 | 100088 | HGSIIYHPSLLPR                 | 497.2807  | 3 | 34 | P y6   | 69.8 | 103.8 |
| 257 | IPI00153317.2 | 100088 | HRGASAINWTLIHGDK              | 888.9696  | 2 | 21 | y4     | 29.5 | 50.5  |
| 258 | IPI00153317.2 | 100088 | HRGASAINWTLIHGDK              | 444.7379  | 4 | 31 |        | 0.0  | 31.0  |
| 259 | IPI00153317.2 | 100088 | HRGASAINWTLIHGDK              | 592.6500  | 3 | 45 | y7     | 65.2 | 110.2 |
| 260 | IPI00153317.2 | 100088 | IGFTGSTEVGK                   | 548.2889  | 2 | 47 | y7     | 46.8 | 93.8  |
| 261 | IPI00153317.2 | 100088 | IGNPLDRDTNHGPNHEAHLRK         | 840.7614  | 3 | 21 | c b8   | 21.2 | 42.2  |
| 262 | IPI00153317.2 | 100088 | ILPNVPEVEDSTDFFK              | 925.4638  | 2 | 41 | c b5 P | 44.5 | 85.5  |
| 263 | IPI00153317.2 | 100088 | IQGATIPINQARPNR               | 550.3131  | 3 | 24 |        | 0.0  | 24.0  |
| 264 | IPI00153317.2 | 100088 | IQGATIPINQARPNR               | 550.6472  | 3 | 26 | P y++9 | 25.4 | 51.4  |
| 265 | IPI00153317.2 | 100088 | KETAMINWDQPAEAIHNWIR          | 808.7374  | 3 | 51 | y++12  | 11.0 | 62.0  |
| 266 | IPI00153317.2 | 100088 | KETAMINWDQPAEAIHNWIR          | 808.7374  | 3 | 66 | y4     | 32.3 | 98.3  |
| 267 | IPI00153317.2 | 100088 | KGGFTIFWADDGLDTGDLQK          | 804.4172  | 3 | 16 |        | 0.0  | 16.0  |
| 268 | IPI00153317.2 | 100088 | KGGFTIFWADDGLDTGDLQK          | 804.4147  | 3 | 19 | y4     | 44.5 | 63.5  |
| 269 | IPI00153317.2 | 100088 | KGGFTIFWADDGLDTGDLQK          | 804.4145  | 3 | 33 | y4     | 44.5 | 77.5  |
| 270 | IPI00153317.2 | 100088 | KLTLQMPYQLFIGGEFVDAEGAK       | 852.7773  | 3 | 31 | y6     | 38.2 | 69.2  |
| 271 | IPI00153317.2 | 100088 | KLTLQMPYQLFIGGEFVDAEGAK       | 852.7776  | 3 | 32 |        | 0.0  | 32.0  |
| 272 | IPI00153317.2 | 100088 | KLTLQMPYQLFIGGEFVDAEGAK       | 852.7776  | 3 | 36 | y6     | 49.6 | 85.6  |
| 273 | IPI00153317.2 | 100088 | KLTLQMPYQLFIGGEFVDAEGAK       | 852.7804  | 3 | 37 | y8     | 33.8 | 70.8  |
| 274 | IPI00153317.2 | 100088 | KLTLQMPYQLFIGGEFVDAEGAK       | 852.7775  | 3 | 38 | y7     | 35.8 | 73.8  |
| 275 | IPI00153317.2 | 100088 | KVSLELGGK                     | 310.8589  | 3 | 16 | c b5   | 6.2  | 22.2  |
| 276 | IPI00153317.2 | 100088 | KVSLELGGK                     | 465.7843  | 2 | 30 | y7     | 49.6 | 79.6  |
| 277 | IPI00153317.2 | 100088 | LADLMEQHQEELATIEALDAGAVYTLALK | 1053.2150 | 3 | 16 | y9     | 5.2  | 21.2  |
| 278 | IPI00153317.2 | 100088 | LADLMEQHQEELATIEALDAGAVYTLALK | 1053.5399 | 3 | 16 | y9     | 5.2  | 21.2  |
| 279 | IPI00153317.2 | 100088 | LADLMEQHQEELATIEALDAGAVYTLALK | 1053.5460 | 3 | 17 | y8     | 12.9 | 29.9  |
| 280 | IPI00153317.2 | 100088 | LADLMEQHQEELATIEALDAGAVYTLALK | 1053.2037 | 3 | 17 | y9     | 20.1 | 37.1  |
| 281 | IPI00153317.2 | 100088 | LADLMEQHQEELATIEALDAGAVYTLALK | 1053.2137 | 3 | 17 | y9     | 12.2 | 29.2  |
| 282 | IPI00153317.2 | 100088 | LADLMEQHQEELATIEALDAGAVYTLALK | 1053.2091 | 3 | 17 |        | 0.0  | 17.0  |
| 283 | IPI00153317.2 | 100088 | LADLMEQHQEELATIEALDAGAVYTLALK | 1053.5453 | 3 | 20 | y9     | 20.1 | 40.1  |
| 284 | IPI00153317.2 | 100088 | LADLMEQHQEELATIEALDAGAVYTLALK | 1053.2137 | 3 | 23 | y9     | 12.9 | 35.9  |

|     |               |        |                                   |           |   |    |        |      |       |
|-----|---------------|--------|-----------------------------------|-----------|---|----|--------|------|-------|
| 285 | IPI00153317.2 | 100088 | LADLMEQHQEELATIEALDAGAVYTLALK     | 1053.2030 | 3 | 28 | y6     | 27.2 | 55.2  |
| 286 | IPI00153317.2 | 100088 | LADLMEQHQEELATIEALDAGAVYTLALK     | 1053.2096 | 3 | 38 | y9     | 30.4 | 68.4  |
| 287 | IPI00153317.2 | 100088 | LADLMEQHQEELATIEALDAGAVYTLALK     | 1053.2143 | 3 | 45 | y9     | 12.9 | 57.9  |
| 288 | IPI00153317.2 | 100088 | LADLMEQHQEELATIEALDAGAVYTLALK     | 1053.2141 | 3 | 46 | y5     | 18.5 | 64.5  |
| 289 | IPI00153317.2 | 100088 | LADLMEQHQEELATIEALDAGAVYTLALK     | 1053.2142 | 3 | 49 |        | 0.0  | 49.0  |
| 290 | IPI00153317.2 | 100088 | LFVEDSIHDQFVQK                    | 568.9578  | 3 | 17 |        | 0.0  | 17.0  |
| 291 | IPI00153317.2 | 100088 | LIAEGTAPR                         | 464.2668  | 2 | 52 | y5     | 25.4 | 77.4  |
| 292 | IPI00153317.2 | 100088 | LQAGTVFVNTYNK                     | 727.8902  | 2 | 58 | y7     | 38.2 | 96.2  |
| 293 | IPI00153317.2 | 100088 | LSDHPDVR                          | 313.4945  | 3 | 19 |        | 0.0  | 19.0  |
| 294 | IPI00153317.2 | 100088 | LSDHPDVR                          | 469.7382  | 2 | 25 | c b6   | 25.4 | 50.4  |
| 295 | IPI00153317.2 | 100088 | LSDHPDVRK                         | 533.7855  | 2 | 25 | c b6   | 38.2 | 63.2  |
| 296 | IPI00153317.2 | 100088 | LSDHPDVRK                         | 356.1928  | 3 | 35 | c b6   | 27.2 | 62.2  |
| 297 | IPI00153317.2 | 100088 | LTFFNSTLNTSGLVAQGEALPIPGAHRPGLVTK | 852.9668  | 4 | 19 |        | 0.0  | 19.0  |
| 298 | IPI00153317.2 | 100088 | LTFFNSTLNTSGLVAQGEALPIPGAHRPGLVTK | 852.7187  | 4 | 22 | y++18  | 27.0 | 49.0  |
| 299 | IPI00153317.2 | 100088 | LTFFNSTLNTSGLVAQGEALPIPGAHRPGLVTK | 852.9673  | 4 | 24 |        | 0.0  | 24.0  |
| 300 | IPI00153317.2 | 100088 | LTFFNSTLNTSGLVAQGEALPIPGAHRPGLVTK | 852.7162  | 4 | 26 |        | 0.0  | 26.0  |
| 301 | IPI00153317.2 | 100088 | LTFFNSTLNTSGLVAQGEALPIPGAHRPGLVTK | 852.7190  | 4 | 34 |        | 0.0  | 34.0  |
| 302 | IPI00153317.2 | 100088 | LVEEVK                            | 358.7132  | 2 | 25 |        | 0.0  | 25.0  |
| 303 | IPI00153317.2 | 100088 | LVEEVK                            | 716.4193  | 1 | 26 | y4     | 41.0 | 67.0  |
| 304 | IPI00153317.2 | 100088 | MMPASQFFK                         | 543.7593  | 2 | 21 |        | 0.0  | 21.0  |
| 305 | IPI00153317.2 | 100088 | NIQLEDGK                          | 458.7405  | 2 | 21 | y5     | 53.0 | 74.0  |
| 306 | IPI00153317.2 | 100088 | NLTLTK                            | 345.2131  | 2 | 18 |        | 0.0  | 18.0  |
| 307 | IPI00153317.2 | 100088 | NLTLTK                            | 689.4196  | 1 | 26 |        | 0.0  | 26.0  |
| 308 | IPI00153317.2 | 100088 | PAQVTPLTALK                       | 569.8454  | 2 | 30 | y8     | 44.3 | 74.3  |
| 309 | IPI00153317.2 | 100088 | PGFFFQPTVFTDVEDHMYIAK             | 830.7338  | 3 | 31 | c b6 P | 27.2 | 58.2  |
| 310 | IPI00153317.2 | 100088 | PGFFFQPTVFTDVEDHMYIAK             | 830.7336  | 3 | 38 | b4     | 9.6  | 47.6  |
| 311 | IPI00153317.2 | 100088 | RPQPEEGATYEGIQK                   | 568.2854  | 3 | 39 | y6     | 46.8 | 85.8  |
| 312 | IPI00153317.2 | 100088 | RPQPEEGATYEGIQK                   | 610.9833  | 3 | 56 | c b8   | 32.0 | 88.0  |
| 313 | IPI00153317.2 | 100088 | TDVAAPFGGFK                       | 555.2854  | 2 | 25 | P y6   | 61.4 | 86.4  |
| 314 | IPI00153317.2 | 100088 | THVGMSIQTFR                       | 426.2207  | 3 | 19 |        | 0.0  | 19.0  |
| 315 | IPI00153317.2 | 100088 | THVGMSIQTFR                       | 638.8274  | 2 | 29 | y8     | 21.2 | 50.2  |
| 316 | IPI00153317.2 | 100088 | VSLELGK                           | 401.7370  | 2 | 31 | y6     | 61.4 | 92.4  |
| 317 | IPI00153317.2 | 100088 | VVEEVGK                           | 380.2165  | 2 | 17 |        | 0.0  | 17.0  |
| 318 | IPI00314298.3 | 56128  | GTWEKPGDAAPMGYDFWYQPR             | 825.0411  | 3 | 20 | y4     | 29.5 | 49.5  |
| 319 | IPI00314298.3 | 56128  | GTWEKPGDAAPMGYDFWYQPR             | 825.0409  | 3 | 33 | y5     | 38.2 | 71.2  |
| 320 | IPI00314298.3 | 56128  | HEIIQTLQMTDGLIPLEIR               | 1111.1098 | 2 | 78 | y8     | 44.3 | 122.3 |
| 321 | IPI00314298.3 | 56128  | LILPGLISSR                        | 534.8424  | 2 | 31 | P y7   | 57.1 | 88.1  |
| 322 | IPI00314298.3 | 56128  | LILPGLISSR                        | 534.8424  | 2 | 34 | P y7   | 33.8 | 67.8  |
| 323 | IPI00314298.3 | 56128  | NAEGTWSVEK                        | 560.7663  | 2 | 37 |        | 0.0  | 37.0  |
| 324 | IPI00314298.3 | 56128  | PGDAAPMGYDFWYQPR                  | 936.4154  | 2 | 50 | y6     | 33.8 | 83.8  |
| 325 | IPI00314298.3 | 56128  | PGDAAPMGYDFWYQPR                  | 936.4156  | 2 | 58 | y6     | 46.8 | 104.8 |



|     |               |       |                              |           |   |    |       |      |       |
|-----|---------------|-------|------------------------------|-----------|---|----|-------|------|-------|
| 326 | IPI00314298.3 | 56128 | RIPGGPQMIQLSLDGK             | 855.4727  | 2 | 62 | c b9  | 12.9 | 74.9  |
| 327 | IPI00110042.1 | 52889 | QYDISNPQKPR                  | 673.3493  | 2 | 42 | P y5  | 75.6 | 117.6 |
| 328 | IPI00110042.1 | 52889 | VIEASEIQAK                   | 1087.5962 | 1 | 34 | y4    | 44.5 | 78.5  |
| 329 | IPI00110042.1 | 52889 | VIEASEIQAK                   | 544.3040  | 2 | 54 | y8    | 58.1 | 112.1 |
| 330 | IPI00110042.1 | 52889 | VIEASEIQAK                   | 544.3041  | 2 | 59 | y8    | 73.4 | 132.4 |
| 331 | IPI00110042.1 | 52889 | VIQVPSK                      | 385.7424  | 2 | 33 | y4    | 57.1 | 90.1  |
| 332 | IPI00133456.1 | 33899 | DGLNAEGLLR                   | 529.2856  | 2 | 53 | y4    | 16.9 | 69.9  |
| 333 | IPI00133456.1 | 33899 | DGLNAEGLLRQPDAGNIFK          | 1015.0300 | 2 | 37 |       | 0.0  | 37.0  |
| 334 | IPI00133456.1 | 33899 | FNDGKVDPAGR                  | 588.2916  | 2 | 42 | P y4  | 62.3 | 104.3 |
| 335 | IPI00133456.1 | 33899 | FNDGKVDPAGR                  | 392.5318  | 3 | 44 |       | 0.0  | 44.0  |
| 336 | IPI00133456.1 | 33899 | HQGSLSLFPDHSVK               | 572.2897  | 3 | 28 | P y6  | 25.4 | 53.4  |
| 337 | IPI00133456.1 | 33899 | HQGSLSLFPDHSVK               | 572.2897  | 3 | 30 | P y6  | 57.1 | 87.1  |
| 338 | IPI00133456.1 | 33899 | HQGSLSLFPDHSVK               | 857.9312  | 2 | 64 | y4    | 16.9 | 80.9  |
| 339 | IPI00133456.1 | 33899 | HQGSLSLFPDHSVKK              | 461.7435  | 4 | 19 | b5    | 16.9 | 35.9  |
| 340 | IPI00133456.1 | 33899 | HQGSLSLFPDHSVKK              | 614.9879  | 3 | 27 | P y7  | 53.0 | 80.0  |
| 341 | IPI00133456.1 | 33899 | HQGSLSLFPDHSVKK              | 461.4930  | 4 | 29 | b5    | 16.9 | 45.9  |
| 342 | IPI00133456.1 | 33899 | IFYIDSLSYTVDAFDYDLQGTGQISNRR | 1122.5356 | 3 | 35 |       | 0.0  | 35.0  |
| 343 | IPI00133456.1 | 33899 | IFYIDSLSYTVDAFDYDLQGTGQISNRR | 1122.5429 | 3 | 38 | y++10 | 0.9  | 38.9  |
| 344 | IPI00133456.1 | 33899 | IFYIDSLSYTVDAFDYDLQGTGQISNRR | 1122.2140 | 3 | 45 |       | 0.0  | 45.0  |
| 345 | IPI00133456.1 | 33899 | IFYIDSLSYTVDAFDYDLQGTGQISNRR | 1122.5439 | 3 | 48 | y++13 | 4.7  | 52.7  |
| 346 | IPI00133456.1 | 33899 | IFYIDSLSYTVDAFDYDLQGTGQISNRR | 1122.5443 | 3 | 49 | y++14 | 11.0 | 60.0  |
| 347 | IPI00133456.1 | 33899 | IFYIDSLSYTVDAFDYDLQGTGQISNRR | 1122.5493 | 3 | 51 |       | 0.0  | 51.0  |
| 348 | IPI00133456.1 | 33899 | IFYIDSLSYTVDAFDYDLQGTGQISNRR | 1122.2162 | 3 | 61 |       | 0.0  | 61.0  |
| 349 | IPI00133456.1 | 33899 | IFYIDSLSYTVDAFDYDLQGTGQISNRR | 1122.2146 | 3 | 64 |       | 0.0  | 64.0  |
| 350 | IPI00133456.1 | 33899 | IFYIDSLSYTVDAFDYDLQGTGQISNRR | 1122.2085 | 3 | 69 | b5    | 16.9 | 85.9  |
| 351 | IPI00133456.1 | 33899 | IFYIDSLSYTVDAFDYDLQGTGQISNRR | 1122.2150 | 3 | 72 | y++17 | 40.5 | 112.5 |
| 352 | IPI00133456.1 | 33899 | IFYIDSLSYTVDAFDYDLQGTGQISNRR | 1122.2197 | 3 | 74 | y++12 | 11.6 | 85.6  |
| 353 | IPI00133456.1 | 33899 | IFYIDSLSYTVDAFDYDLQGTGQISNRR | 1122.2098 | 3 | 82 |       | 0.0  | 82.0  |
| 354 | IPI00133456.1 | 33899 | ITGLGVK                      | 687.4411  | 1 | 33 |       | 0.0  | 33.0  |
| 355 | IPI00133456.1 | 33899 | KYFDQVDISNGLDWSLDHK          | 761.3650  | 3 | 36 | y++9  | 35.8 | 71.8  |
| 356 | IPI00133456.1 | 33899 | KYFDQVDISNGLDWSLDHK          | 761.0358  | 3 | 48 | y7    | 11.6 | 59.6  |
| 357 | IPI00133456.1 | 33899 | KYFDQVDISNGLDWSLDHK          | 761.0357  | 3 | 49 | c b7  | 12.9 | 61.9  |
| 358 | IPI00133456.1 | 33899 | NNRFNDGK                     | 482.7340  | 2 | 30 | c b6  | 15.6 | 45.6  |
| 359 | IPI00133456.1 | 33899 | NNRFNDGKVDPAGR               | 520.5946  | 3 | 17 | P y4  | 29.5 | 46.5  |
| 360 | IPI00133456.1 | 33899 | NNRFNDGKVDPAGR               | 390.6976  | 4 | 19 | P y4  | 15.6 | 34.6  |
| 361 | IPI00133456.1 | 33899 | NNRFNDGKVDPAGR               | 780.3922  | 2 | 25 | P y4  | 49.1 | 74.1  |
| 362 | IPI00133456.1 | 33899 | QLGGYVATIGTK                 | 604.3376  | 2 | 28 |       | 0.0  | 28.0  |
| 363 | IPI00133456.1 | 33899 | RLQTVKLPVDK                  | 432.9384  | 3 | 35 | c b5  | 7.7  | 42.7  |
| 364 | IPI00133456.1 | 33899 | VAVDAPVSSVALR                | 642.3700  | 2 | 54 | P y8  | 20.1 | 74.1  |
| 365 | IPI00133456.1 | 33899 | VAVDAPVSSVALR                | 642.3745  | 2 | 72 | P y8  | 44.3 | 116.3 |
| 366 | IPI00133456.1 | 33899 | VIRLDPETGK                   | 376.5521  | 3 | 35 |       | 0.0  | 35.0  |

|     |               |        |                             |           |   |    |        |      |       |
|-----|---------------|--------|-----------------------------|-----------|---|----|--------|------|-------|
| 367 | IPI00133456.1 | 33899  | VIRLDPETGK                  | 564.3243  | 2 | 49 | c b5 P | 38.2 | 87.2  |
| 368 | IPI00133456.1 | 33899  | WDTVSNQVQR                  | 616.8052  | 2 | 51 | y6     | 57.1 | 108.1 |
| 369 | IPI00133456.1 | 33899  | WDTVSNQVQR                  | 616.8053  | 2 | 56 | y6     | 53.0 | 109.0 |
| 370 | IPI00133456.1 | 33899  | YFAGTMAEETAPAVLER           | 928.4503  | 2 | 91 |        | 0.0  | 91.0  |
| 371 | IPI00285029.1 | 274994 | AGLYGLPK                    | 409.7420  | 2 | 28 |        | 0.0  | 28.0  |
| 372 | IPI00285029.1 | 274994 | ALIAEATK                    | 408.7453  | 2 | 26 | y6     | 82.7 | 108.7 |
| 373 | IPI00285029.1 | 274994 | DGAWGAFR                    | 440.2091  | 2 | 37 | y4     | 20.6 | 57.6  |
| 374 | IPI00285029.1 | 274994 | DNLEFFLTNLGK                | 705.8677  | 2 | 75 | y5     | 53.0 | 128.0 |
| 375 | IPI00285029.1 | 274994 | EDTQVADVTTSR                | 661.3150  | 2 | 66 | y7     | 46.8 | 112.8 |
| 376 | IPI00285029.1 | 274994 | FDASFFGVHPK                 | 626.3165  | 2 | 43 | y6     | 25.4 | 68.4  |
| 377 | IPI00285029.1 | 274994 | FDASFFGVHPK                 | 417.8766  | 3 | 43 | y++10  | 61.4 | 104.4 |
| 378 | IPI00285029.1 | 274994 | FLEIGKFDLSNNHPLGMAIFLK      | 835.7855  | 3 | 37 |        | 0.0  | 37.0  |
| 379 | IPI00285029.1 | 274994 | GGNVGINSFGFGGSNVHVILQPNTNTR | 848.4374  | 3 | 19 |        | 0.0  | 19.0  |
| 380 | IPI00285029.1 | 274994 | GNAGQTNYGANSTMER            | 909.3966  | 2 | 81 | y7     | 12.9 | 93.9  |
| 381 | IPI00285029.1 | 274994 | GYTVLGVETR                  | 525.7834  | 2 | 50 | y6     | 14.6 | 64.6  |
| 382 | IPI00285029.1 | 274994 | HDLVMNVYR                   | 573.7899  | 2 | 30 | y7     | 33.8 | 63.8  |
| 383 | IPI00285029.1 | 274994 | HFQLEQDKPK                  | 423.8914  | 3 | 34 | y5     | 15.6 | 49.6  |
| 384 | IPI00285029.1 | 274994 | HFQLEQDKPK                  | 635.3333  | 2 | 37 | c b7   | 46.8 | 83.8  |
| 385 | IPI00285029.1 | 274994 | IPALLNTQPMLQLEYTATDRHPQALK  | 741.6528  | 4 | 31 |        | 0.0  | 31.0  |
| 386 | IPI00285029.1 | 274994 | IPALLNTQPMLQLEYTATDRHPQALK  | 741.6504  | 4 | 32 | b8 P   | 13.7 | 45.7  |
| 387 | IPI00285029.1 | 274994 | IPALLNTQPMLQLEYTATDRHPQALK  | 988.5324  | 3 | 33 |        | 0.0  | 33.0  |
| 388 | IPI00285029.1 | 274994 | LLLPEDPLISGLLNSQALK         | 1018.0975 | 2 | 30 | y6     | 6.6  | 36.6  |
| 389 | IPI00285029.1 | 274994 | LLLPEDPLISGLLNSQALK         | 679.0674  | 3 | 40 | y6     | 62.3 | 102.3 |
| 390 | IPI00285029.1 | 274994 | LLLPEDPLISGLLNSQALK         | 1018.0972 | 2 | 54 | y6     | 27.2 | 81.2  |
| 391 | IPI00285029.1 | 274994 | LPESENLQEFWANLIGGVDMVTDDDRR | 1041.1648 | 3 | 68 | y++16  | 15.5 | 83.5  |
| 392 | IPI00285029.1 | 274994 | LPESENLQEFWANLIGGVDMVTDDDRR | 1040.8347 | 3 | 83 |        | 0.0  | 83.0  |
| 393 | IPI00285029.1 | 274994 | LQVVDRPLPVR                 | 646.3952  | 2 | 18 | P y5   | 49.6 | 67.6  |
| 394 | IPI00285029.1 | 274994 | QAHTMDPQLR                  | 399.5332  | 3 | 20 |        | 0.0  | 20.0  |
| 395 | IPI00285029.1 | 274994 | QAPAPTAHAALPHLLHASGR        | 504.7778  | 4 | 18 |        | 0.0  | 18.0  |
| 396 | IPI00285029.1 | 274994 | QFLDVEHSK                   | 551.7806  | 2 | 25 |        | 0.0  | 25.0  |
| 397 | IPI00285029.1 | 274994 | RAYLQAR                     | 439.2542  | 2 | 28 | y6     | 35.8 | 63.8  |
| 398 | IPI00285029.1 | 274994 | RVYATILNAGTNTDGSK           | 890.9642  | 2 | 83 | c b7   | 18.5 | 101.5 |
| 399 | IPI00285029.1 | 274994 | SDEAVKPLGVK                 | 571.8251  | 2 | 46 | P y5   | 83.9 | 129.9 |
| 400 | IPI00285029.1 | 274994 | SLGLSLEETPVVFENVSFHQATILPK  | 952.8474  | 3 | 27 | y++10  | 1.3  | 28.3  |
| 401 | IPI00285029.1 | 274994 | SLGLSLEETPVVFENVSFHQATILPK  | 952.8477  | 3 | 37 |        | 0.0  | 37.0  |
| 402 | IPI00285029.1 | 274994 | SLGLSLEETPVVFENVSFHQATILPK  | 952.8441  | 3 | 41 |        | 0.0  | 41.0  |
| 403 | IPI00285029.1 | 274994 | TGTVALEVR                   | 473.2723  | 2 | 59 | y4     | 15.6 | 74.6  |
| 404 | IPI00285029.1 | 274994 | TLLEGSGLESIIIIHSSLAEPR      | 817.4489  | 3 | 31 | y++14  | 4.7  | 35.7  |
| 405 | IPI00285029.1 | 274994 | TLLEGSGLESIIIIHSSLAEPR      | 817.4492  | 3 | 33 | b4     | 20.6 | 53.6  |
| 406 | IPI00285029.1 | 274994 | TLLEGSGLESIIIIHSSLAEPR      | 817.4519  | 3 | 48 |        | 0.0  | 48.0  |
| 407 | IPI00285029.1 | 274994 | VAEVLAGEGHLYSR              | 500.9325  | 3 | 37 | y++12  | 66.6 | 103.6 |

|     |               |        |                                        |           |   |    |         |      |       |
|-----|---------------|--------|----------------------------------------|-----------|---|----|---------|------|-------|
| 408 | IPI00285029.1 | 274994 | VFTTVGSAEK                             | 519.7769  | 2 | 34 | y5      | 57.1 | 91.1  |
| 409 | IPI00285029.1 | 274994 | VHLTGINVNPALFPPVEFPAPR                 | 834.1219  | 3 | 18 |         | 0.0  | 18.0  |
| 410 | IPI00285029.1 | 274994 | VHLTGINVNPALFPPVEFPAPR                 | 834.1219  | 3 | 25 | y5      | 8.5  | 33.5  |
| 411 | IPI00285029.1 | 274994 | VLEALLPLK                              | 498.3286  | 2 | 48 | y4      | 83.9 | 131.9 |
| 412 | IPI00285029.1 | 274994 | VLLSLEHG VWAPNLHFHNPNEIPALLDGR         | 839.9494  | 4 | 18 | P y7    | 49.6 | 67.6  |
| 413 | IPI00285029.1 | 274994 | VLLSLEHG VWAPNLHFHNPNEIPALLDGR         | 839.9489  | 4 | 21 | P y7    | 23.8 | 44.8  |
| 414 | IPI00285029.1 | 274994 | VLVQVREEEPEAVLPGAQPTLISAISK            | 958.8713  | 3 | 22 |         | 0.0  | 22.0  |
| 415 | IPI00285029.1 | 274994 | VQEVQQVSTNK                            | 630.3330  | 2 | 59 | c b7    | 23.8 | 82.8  |
| 416 | IPI00285029.1 | 274994 | VSVHIIEGDHR                            | 631.3360  | 2 | 24 | c b9    | 30.4 | 54.4  |
| 417 | IPI00285029.1 | 274994 | VSVHIIEGDHR                            | 421.2263  | 3 | 44 | y5      | 16.9 | 60.9  |
| 418 | IPI00285029.1 | 274994 | VYLWEDPNSK                             | 625.8087  | 2 | 35 | y7      | 58.1 | 93.1  |
| 419 | IPI00285029.1 | 274994 | WLSTSIPEAQWQSSLAR                      | 981.0004  | 2 | 44 | c b6 P  | 14.6 | 58.6  |
| 420 | IPI00285029.1 | 274994 | YHGNTVLLR                              | 536.7989  | 2 | 24 | y7      | 22.4 | 46.4  |
| 421 | IPI00111908.4 | 166872 | AFAISGPFNVQFLVK                        | 819.4573  | 2 | 46 | c b6 P  | 29.5 | 75.5  |
| 422 | IPI00111908.4 | 166872 | AFAISGPFNVQFLVK                        | 819.4574  | 2 | 55 | y++12   | 33.8 | 88.8  |
| 423 | IPI00111908.4 | 166872 | AMLSTGFK                               | 427.7261  | 2 | 16 | y6      | 49.6 | 65.6  |
| 424 | IPI00111908.4 | 166872 | ELSEPSSTR                              | 503.2464  | 2 | 27 | P y5    | 38.2 | 65.2  |
| 425 | IPI00111908.4 | 166872 | EPLFGISTGNIITGLAAGAK                   | 966.0378  | 2 | 63 | y9      | 40.2 | 103.2 |
| 426 | IPI00111908.4 | 166872 | EVEMDAVGK                              | 489.2343  | 2 | 15 |         | 0.0  | 15.0  |
| 427 | IPI00111908.4 | 166872 | FLGVAEQLHNEGFK                         | 794.9109  | 2 | 64 | y6      | 65.2 | 129.2 |
| 428 | IPI00111908.4 | 166872 | GQILTMANPIIGNGGAPD TTARDELGLNK         | 980.1773  | 3 | 50 |         | 0.0  | 50.0  |
| 429 | IPI00111908.4 | 166872 | GQILTMANPIIGNGGAPD TTARDELGLNK         | 980.1776  | 3 | 60 | P y++13 | 18.3 | 78.3  |
| 430 | IPI00111908.4 | 166872 | GQNQPVLNITNR                           | 677.3671  | 2 | 75 | P y8    | 42.2 | 117.2 |
| 431 | IPI00111908.4 | 166872 | GYSFGHPSSVAGEVVFNTGLGGYPEALTDPAYK      | 1130.2086 | 3 | 40 | y8      | 33.8 | 73.8  |
| 432 | IPI00111908.4 | 166872 | IEFEGQSVDFVDPNK                        | 862.4105  | 2 | 56 | y4      | 44.5 | 100.5 |
| 433 | IPI00111908.4 | 166872 | ILESDRK                                | 430.7455  | 2 | 21 | y4      | 29.5 | 50.5  |
| 434 | IPI00111908.4 | 166872 | ILESDRKEPLFGISTGNIITGLAAGAK            | 693.8886  | 4 | 20 |         | 0.0  | 20.0  |
| 435 | IPI00111908.4 | 166872 | ILESDRKEPLFGISTGNIITGLAAGAK            | 693.8887  | 4 | 23 |         | 0.0  | 23.0  |
| 436 | IPI00111908.4 | 166872 | IMGTSPLQIDRAEDR                        | 567.9576  | 3 | 17 |         | 0.0  | 17.0  |
| 437 | IPI00111908.4 | 166872 | LFAEAVQK                               | 453.2583  | 2 | 61 | y6      | 82.7 | 143.7 |
| 438 | IPI00111908.4 | 166872 | LFATEATSDWLNANNVPATPVAVPSQEQQNPSLSSIRK | 1025.5161 | 4 | 20 |         | 0.0  | 20.0  |
| 439 | IPI00111908.4 | 166872 | LNEINEK                                | 430.2300  | 2 | 28 |         | 0.0  | 28.0  |
| 440 | IPI00111908.4 | 166872 | LRDADPILR                              | 534.8124  | 2 | 36 | c b5 P  | 38.2 | 74.2  |
| 441 | IPI00111908.4 | 166872 | PALVASR                                | 357.2188  | 2 | 41 | y5      | 49.6 | 90.6  |
| 442 | IPI00111908.4 | 166872 | QADAVYFLPITPQFVTEVIK                   | 1140.6241 | 2 | 28 | c b8 P  | 12.2 | 40.2  |
| 443 | IPI00111908.4 | 166872 | QADAVYFLPITPQFVTEVIK                   | 1140.6245 | 2 | 29 | c b8 P  | 5.6  | 34.6  |
| 444 | IPI00111908.4 | 166872 | QADAVYFLPITPQFVTEVIK                   | 1140.6243 | 2 | 30 |         | 0.0  | 30.0  |
| 445 | IPI00111908.4 | 166872 | QNLIAEVSTK                             | 551.8087  | 2 | 54 |         | 0.0  | 54.0  |
| 446 | IPI00111908.4 | 166872 | RFLEEATR                               | 511.2747  | 2 | 48 | y4      | 27.2 | 75.2  |
| 447 | IPI00111908.4 | 166872 | RLPTLEQPIIPSDYVAIK                     | 685.0618  | 3 | 23 | P y8    | 58.1 | 81.1  |
| 448 | IPI00111908.4 | 166872 | RLPTLEQPIIPSDYVAIK                     | 685.3952  | 3 | 28 | b5      | 14.6 | 42.6  |

|     |               |        |                               |           |   |    |         |      |       |
|-----|---------------|--------|-------------------------------|-----------|---|----|---------|------|-------|
| 449 | IPI00111908.4 | 166872 | RTSVNVVR                      | 465.7776  | 2 | 17 | c b7    | 13.7 | 30.7  |
| 450 | IPI00111908.4 | 166872 | SIFSAVLDELK                   | 611.3406  | 2 | 54 | y6      | 38.2 | 92.2  |
| 451 | IPI00111908.4 | 166872 | SLFHYS                        | 411.7164  | 2 | 28 | y4      | 62.3 | 90.3  |
| 452 | IPI00111908.4 | 166872 | SVGEVMAIGR                    | 509.7712  | 2 | 52 | y5      | 82.7 | 134.7 |
| 453 | IPI00111908.4 | 166872 | TAHIVLEDGTK                   | 395.2153  | 3 | 31 | y5      | 27.2 | 58.2  |
| 454 | IPI00111908.4 | 166872 | TAHIVLEDGTK                   | 592.3203  | 2 | 50 | y7      | 49.6 | 99.6  |
| 455 | IPI00111908.4 | 166872 | TFEESFQK                      | 508.2406  | 2 | 18 | y6      | 49.6 | 67.6  |
| 456 | IPI00111908.4 | 166872 | TVLMNPNIASVQTNEVGLK           | 677.0316  | 3 | 32 | y7      | 32.0 | 64.0  |
| 457 | IPI00111908.4 | 166872 | TVLMNPNIASVQTNEVGLK           | 1015.0429 | 2 | 71 | y8      | 1.8  | 72.8  |
| 458 | IPI00111908.4 | 166872 | TVLMNPNIASVQTNEVGLK           | 1015.0428 | 2 | 76 | y8      | 12.2 | 88.2  |
| 459 | IPI00111908.4 | 166872 | VAGLLVLNYSNDYNHWLTK           | 764.7337  | 3 | 20 |         | 0.0  | 20.0  |
| 460 | IPI00111908.4 | 166872 | VAGLLVLNYSNDYNHWLTK           | 764.7336  | 3 | 27 | b6      | 13.7 | 40.7  |
| 461 | IPI00111908.4 | 166872 | VLGTSVESIMATEDR               | 804.4018  | 2 | 86 | y5      | 16.9 | 102.9 |
| 462 | IPI00111908.4 | 166872 | VMIGESIDEK                    | 560.7812  | 2 | 37 | y8      | 69.8 | 106.8 |
| 463 | IPI00111908.4 | 166872 | VPAIYGVDR                     | 545.7983  | 2 | 43 | c b8    | 73.4 | 116.4 |
| 464 | IPI00111908.4 | 166872 | VSQEHPVLT                     | 412.9030  | 3 | 16 | y++9    | 35.8 | 51.8  |
| 465 | IPI00111908.4 | 166872 | VSQEHPVLT                     | 618.8519  | 2 | 47 | P y6    | 82.7 | 129.7 |
| 466 | IPI00380501.2 | 55131  | EAGFPPGVNIVPGYPTAGAAISSHMDVDK | 1018.8393 | 3 | 21 |         | 0.0  | 21.0  |
| 467 | IPI00380501.2 | 55131  | EAGFPPGVNIVPGYPTAGAAISSHMDVDK | 1018.8392 | 3 | 23 |         | 0.0  | 23.0  |
| 468 | IPI00380501.2 | 55131  | EAGFPPGVNIVPGYPTAGAAISSHMDVDK | 1018.8396 | 3 | 26 | P y++19 | 4.3  | 30.3  |
| 469 | IPI00380501.2 | 55131  | EAGFPPGVNIVPGYPTAGAAISSHMDVDK | 1018.8395 | 3 | 31 |         | 0.0  | 31.0  |
| 470 | IPI00380501.2 | 55131  | EAGFPPGVNIVPGYPTAGAAISSHMDVDK | 1018.8394 | 3 | 33 |         | 0.0  | 33.0  |
| 471 | IPI00380501.2 | 55131  | EEIFGPVQQIMK                  | 709.8717  | 2 | 41 | c b8    | 5.4  | 46.4  |
| 472 | IPI00380501.2 | 55131  | EEIFGPVQQIMK                  | 709.8716  | 2 | 52 | c b8    | 5.4  | 57.4  |
| 473 | IPI00380501.2 | 55131  | ELGEHGLYEYTELK                | 840.9085  | 2 | 38 |         | 0.0  | 38.0  |
| 474 | IPI00380501.2 | 55131  | GFFVQPTVFSNVTDEMR             | 987.4732  | 2 | 46 | b4      | 23.4 | 69.4  |
| 475 | IPI00380501.2 | 55131  | GFFVQPTVFSNVTDEMR             | 987.4734  | 2 | 55 | b4      | 9.6  | 64.6  |
| 476 | IPI00380501.2 | 55131  | GFFVQPTVFSNVTDEMR             | 987.9757  | 2 | 57 |         | 0.0  | 57.0  |
| 477 | IPI00380501.2 | 55131  | GFFVQPTVFSNVTDEMR             | 987.9754  | 2 | 57 | y8      | 33.8 | 90.8  |
| 478 | IPI00380501.2 | 55131  | GFFVQPTVFSNVTDEMR             | 987.9757  | 2 | 60 | c b4    | 9.6  | 69.6  |
| 479 | IPI00380501.2 | 55131  | GFFVQPTVFSNVTDEMR             | 987.9761  | 2 | 66 | c b5 P  | 62.3 | 128.3 |
| 480 | IPI00380501.2 | 55131  | GFFVQPTVFSNVTDEMR             | 987.9756  | 2 | 73 | y8      | 32.0 | 105.0 |
| 481 | IPI00380501.2 | 55131  | IFINNEWHNSVSGK                | 548.9423  | 3 | 21 | y++13   | 78.1 | 99.1  |
| 482 | IPI00380501.2 | 55131  | IFVEESVYDEFVK                 | 802.3995  | 2 | 35 | y8      | 32.0 | 67.0  |
| 483 | IPI00380501.2 | 55131  | IFVEESVYDEFVK                 | 802.3997  | 2 | 53 | y5      | 83.9 | 136.9 |
| 484 | IPI00380501.2 | 55131  | IFVEESVYDEFVK                 | 802.3996  | 2 | 57 |         | 0.0  | 57.0  |
| 485 | IPI00380501.2 | 55131  | IFVEESVYDEFVK                 | 802.3998  | 2 | 80 | y5      | 75.6 | 155.6 |
| 486 | IPI00380501.2 | 55131  | IHGQTIPSDGDIFTYTR             | 641.3199  | 3 | 54 | y5      | 25.4 | 79.4  |
| 487 | IPI00380501.2 | 55131  | IHGQTIPSDGDIFTYTR             | 640.9880  | 3 | 56 | y4      | 27.2 | 83.2  |
| 488 | IPI00380501.2 | 55131  | IHGQTIPSDGDIFTYTRR            | 693.0256  | 3 | 15 | y++9    | 7.1  | 22.1  |
| 489 | IPI00380501.2 | 55131  | ILDLESKK                      | 372.5607  | 3 | 30 | y6      | 36.1 | 66.1  |

|     |               |       |                           |           |   |    |        |      |       |
|-----|---------------|-------|---------------------------|-----------|---|----|--------|------|-------|
| 490 | IPI00380501.2 | 55131 | ILDIESGKK                 | 372.5607  | 3 | 30 | y5     | 14.6 | 44.6  |
| 491 | IPI00380501.2 | 55131 | ILDIESGKK                 | 558.3376  | 2 | 40 | y8     | 85.6 | 125.6 |
| 492 | IPI00380501.2 | 55131 | KYVLGNPLTPGINQGPQIDKEQHDK | 930.8273  | 3 | 45 | y6     | 35.8 | 80.8  |
| 493 | IPI00380501.2 | 55131 | LADLMER                   | 424.2207  | 2 | 45 | y5     | 38.2 | 83.2  |
| 494 | IPI00380501.2 | 55131 | LLLATMEALNGGK             | 666.3660  | 2 | 42 | b9     | 12.2 | 54.2  |
| 495 | IPI00380501.2 | 55131 | QAFQIGSPWR                | 595.3095  | 2 | 44 |        | 0.0  | 44.0  |
| 496 | IPI00380501.2 | 55131 | RANNTTYGLAAGLFTK          | 566.6373  | 3 | 24 | y6     | 38.2 | 62.2  |
| 497 | IPI00380501.2 | 55131 | RVTLELGGK                 | 486.7958  | 2 | 29 | c b5   | 14.6 | 43.6  |
| 498 | IPI00380501.2 | 55131 | RVTLELGGK                 | 324.8659  | 3 | 36 | c b4   | 6.6  | 42.6  |
| 499 | IPI00380501.2 | 55131 | RVTLELGGK                 | 486.7958  | 2 | 51 | c b5   | 25.4 | 76.4  |
| 500 | IPI00380501.2 | 55131 | SVDDVIK                   | 388.2137  | 2 | 28 | y5     | 69.8 | 97.8  |
| 501 | IPI00380501.2 | 55131 | SVDDVIK                   | 775.4214  | 1 | 38 | c b5   | 29.5 | 67.5  |
| 502 | IPI00380501.2 | 55131 | VAFTGSTQVGK               | 547.7962  | 2 | 47 | y7     | 22.4 | 69.4  |
| 503 | IPI00380501.2 | 55131 | YVLGNPLTPGINQGPQIDK       | 1013.0473 | 2 | 36 |        | 0.0  | 36.0  |
| 504 | IPI00380501.2 | 55131 | YVLGNPLTPGINQGPQIDK       | 1013.0478 | 2 | 50 |        | 0.0  | 50.0  |
| 505 | IPI00221890.4 | 29633 | DIKHDSLQPWSASYDPGSAK      | 575.5336  | 4 | 18 | P y5   | 27.2 | 45.2  |
| 506 | IPI00221890.4 | 29633 | DIKHDSLQPWSASYDPGSAK      | 767.3720  | 3 | 20 | b5 P   | 62.3 | 82.3  |
| 507 | IPI00221890.4 | 29633 | DIKHDSLQPWSASYDPGSAK      | 767.3720  | 3 | 33 | P y5   | 44.5 | 77.5  |
| 508 | IPI00221890.4 | 29633 | DIKHDSLQPWSASYDPGSAK      | 767.3694  | 3 | 52 | P y5   | 38.2 | 90.2  |
| 509 | IPI00221890.4 | 29633 | EPMTVSSDQMAK              | 662.3013  | 2 | 27 | y7     | 49.6 | 76.6  |
| 510 | IPI00221890.4 | 29633 | EPMTVSSDQMAK              | 662.2994  | 2 | 35 | y7     | 65.2 | 100.2 |
| 511 | IPI00221890.4 | 29633 | EWGYASHNGPDHWHELYPIAK     | 836.7194  | 3 | 21 |        | 0.0  | 21.0  |
| 512 | IPI00221890.4 | 29633 | EWGYASHNGPDHWHELYPIAK     | 836.7224  | 3 | 25 | P y4   | 41.0 | 66.0  |
| 513 | IPI00221890.4 | 29633 | GDNQSPIELHTK              | 669.8377  | 2 | 24 | P y7   | 61.4 | 85.4  |
| 514 | IPI00221890.4 | 29633 | GEFQILLDALDK              | 681.3742  | 2 | 78 | y7     | 90.2 | 168.2 |
| 515 | IPI00221890.4 | 29633 | GEFQILLDALDK              | 681.3688  | 2 | 84 | y5     | 97.9 | 181.9 |
| 516 | IPI00221890.4 | 29633 | GEFQILLDALDK              | 681.3689  | 2 | 84 | c b5   | 27.2 | 111.2 |
| 517 | IPI00221890.4 | 29633 | GGPLSGPYR                 | 452.2376  | 2 | 39 | y4     | 44.5 | 83.5  |
| 518 | IPI00221890.4 | 29633 | HDPSLQPWSASYDPGSAK        | 972.4520  | 2 | 30 |        | 0.0  | 30.0  |
| 519 | IPI00221890.4 | 29633 | HDPSLQPWSASYDPGSAK        | 648.6378  | 3 | 43 | c b6 P | 22.4 | 65.4  |
| 520 | IPI00221890.4 | 29633 | HDPSLQPWSASYDPGSAK        | 972.4517  | 2 | 45 |        | 0.0  | 45.0  |
| 521 | IPI00221890.4 | 29633 | HDPSLQPWSASYDPGSAK        | 971.9486  | 2 | 48 | c b6 P | 29.5 | 77.5  |
| 522 | IPI00221890.4 | 29633 | HDPSLQPWSASYDPGSAK        | 648.3068  | 3 | 48 | c b6 P | 27.2 | 75.2  |
| 523 | IPI00221890.4 | 29633 | HDPSLQPWSASYDPGSAK        | 971.9525  | 2 | 49 | c b6 P | 27.2 | 76.2  |
| 524 | IPI00221890.4 | 29633 | HDPSLQPWSASYDPGSAK        | 648.3021  | 3 | 56 | P y5   | 29.5 | 85.5  |
| 525 | IPI00221890.4 | 29633 | LRQFHLHWGSSDDHGSEHTVDGVK  | 686.8348  | 4 | 27 |        | 0.0  | 27.0  |
| 526 | IPI00221890.4 | 29633 | QPDGIAVVGIFLK             | 678.8973  | 2 | 16 | y8     | 46.8 | 62.8  |
| 527 | IPI00221890.4 | 29633 | QPDGIAVVGIFLK             | 678.8974  | 2 | 16 | y8     | 69.8 | 85.8  |
| 528 | IPI00221890.4 | 29633 | QPDGIAVVGIFLK             | 678.8973  | 2 | 17 | y8     | 58.1 | 75.1  |
| 529 | IPI00221890.4 | 29633 | QPDGIAVVGIFLK             | 678.8973  | 2 | 18 | y8     | 73.4 | 91.4  |
| 530 | IPI00221890.4 | 29633 | QPDGIAVVGIFLK             | 678.8973  | 2 | 21 | y8     | 42.2 | 63.2  |

|     |               |       |                          |           |   |    |        |      |       |
|-----|---------------|-------|--------------------------|-----------|---|----|--------|------|-------|
| 531 | IPI00221890.4 | 29633 | QPDGIAVVGIFLK            | 678.8973  | 2 | 26 | y8     | 44.3 | 70.3  |
| 532 | IPI00221890.4 | 29633 | SLFSSAENEPVPLVGNWRPPQPVK | 916.1506  | 3 | 55 |        | 0.0  | 55.0  |
| 533 | IPI00221890.4 | 29633 | SLFSSAENEPVPLVGNWRPPQPVK | 916.1544  | 3 | 57 | c b9 P | 66.6 | 123.6 |
| 534 | IPI00221890.4 | 29633 | SLFSSAENEPVPLVGNWRPPQPVK | 916.1504  | 3 | 60 | y++17  | 9.7  | 69.7  |
| 535 | IPI00221890.4 | 29633 | SLFSSAENEPVPLVGNWRPPQPVK | 916.1506  | 3 | 62 | b9 P   | 40.2 | 102.2 |
| 536 | IPI00221890.4 | 29633 | VVFDDTYDR                | 565.2616  | 2 | 40 | y7     | 33.8 | 73.8  |
| 537 | IPI00221890.4 | 29633 | VVFDDTYDR                | 565.2616  | 2 | 43 | y7     | 33.8 | 76.8  |
| 538 | IPI00221890.4 | 29633 | YAAELHLVHWNPK            | 395.2113  | 4 | 17 | y++9   | 23.8 | 40.8  |
| 539 | IPI00221890.4 | 29633 | YAAELHLVHWNPK            | 395.2112  | 4 | 26 | y++9   | 89.0 | 115.0 |
| 540 | IPI00221890.4 | 29633 | YAAELHLVHWNPK            | 526.6124  | 3 | 27 |        | 0.0  | 27.0  |
| 541 | IPI00221890.4 | 29633 | YAAELHLVHWNPK            | 526.6124  | 3 | 29 | y5     | 62.3 | 91.3  |
| 542 | IPI00221890.4 | 29633 | YAAELHLVHWNPK            | 526.6124  | 3 | 32 | y++8   | 27.2 | 59.2  |
| 543 | IPI00221890.4 | 29633 | YNTFGEALK                | 521.7636  | 2 | 16 | y7     | 21.2 | 37.2  |
| 544 | IPI00221890.4 | 29633 | YNTFGEALK                | 521.7646  | 2 | 25 | y6     | 53.0 | 78.0  |
| 545 | IPI00221890.4 | 29633 | YNTFGEALKQPDGIAVVGIFLK   | 794.4342  | 3 | 20 | y8     | 32.0 | 52.0  |
| 546 | IPI00221890.4 | 29633 | YNTFGEALKQPDGIAVVGIFLK   | 794.4338  | 3 | 24 | y8     | 21.2 | 45.2  |
| 547 | IPI00221890.4 | 29633 | YNTFGEALKQPDGIAVVGIFLK   | 794.4367  | 3 | 27 | y7     | 35.8 | 62.8  |
| 548 | IPI00221890.4 | 29633 | YNTFGEALKQPDGIAVVGIFLK   | 794.4334  | 3 | 28 | y5     | 49.1 | 77.1  |
| 549 | IPI00221890.4 | 29633 | YNTFGEALKQPDGIAVVGIFLK   | 794.4367  | 3 | 34 | y5     | 20.6 | 54.6  |
| 550 | IPI00221890.4 | 29633 | YNTFGEALKQPDGIAVVGIFLK   | 794.4343  | 3 | 35 | y8     | 42.2 | 77.2  |
| 551 | IPI00230212.3 | 26067 | ADIVENQVMDTR             | 695.8368  | 2 | 72 | y8     | 21.2 | 93.2  |
| 552 | IPI00230212.3 | 26067 | FKLGLDFPNLPYLIDGSHK      | 725.7274  | 3 | 47 | y6     | 14.6 | 61.6  |
| 553 | IPI00230212.3 | 26067 | GLTHPIR                  | 793.4672  | 1 | 19 |        | 0.0  | 19.0  |
| 554 | IPI00230212.3 | 26067 | HHLDGETEER               | 676.2985  | 2 | 47 | y7     | 46.8 | 93.8  |
| 555 | IPI00230212.3 | 26067 | HHLDGETEER               | 451.2006  | 3 | 49 | y4     | 32.3 | 81.3  |
| 556 | IPI00230212.3 | 26067 | HHLDGETEERIR             | 540.9294  | 3 | 26 | b6     | 6.6  | 32.6  |
| 557 | IPI00230212.3 | 26067 | HHLDGETEERIR             | 405.9488  | 4 | 33 | y++10  | 7.1  | 40.1  |
| 558 | IPI00230212.3 | 26067 | IRADIVENQVMDTR           | 553.9562  | 3 | 31 | y4     | 15.6 | 46.6  |
| 559 | IPI00230212.3 | 26067 | ISAYMK                   | 356.6885  | 2 | 18 | y5     | 62.3 | 80.3  |
| 560 | IPI00230212.3 | 26067 | ISAYMK                   | 712.3693  | 1 | 30 | c b4   | 1.3  | 31.3  |
| 561 | IPI00230212.3 | 26067 | ITQSNAILR                | 1015.5908 | 1 | 20 |        | 0.0  | 20.0  |
| 562 | IPI00230212.3 | 26067 | ITQSNAILR                | 508.2987  | 2 | 56 | y6     | 53.0 | 109.0 |
| 563 | IPI00230212.3 | 26067 | ITQSNAILR                | 508.2986  | 2 | 64 | y6     | 53.0 | 117.0 |
| 564 | IPI00230212.3 | 26067 | KHHLDGETEER              | 740.3457  | 2 | 36 | y8     | 46.8 | 82.8  |
| 565 | IPI00230212.3 | 26067 | KHHLDGETEER              | 493.8996  | 3 | 79 | y5     | 18.5 | 97.5  |
| 566 | IPI00230212.3 | 26067 | KHHLDGETEERIR            | 583.6273  | 3 | 30 |        | 0.0  | 30.0  |
| 567 | IPI00230212.3 | 26067 | LGLDFPNLPYLIDGSHK        | 634.0060  | 3 | 27 | b5 P   | 7.1  | 34.1  |
| 568 | IPI00230212.3 | 26067 | LGLDFPNLPYLIDGSHK        | 634.0078  | 3 | 33 | c b5 P | 15.6 | 48.6  |
| 569 | IPI00230212.3 | 26067 | LGLDFPNLPYLIDGSHK        | 633.6770  | 3 | 34 | y++15  | 54.8 | 88.8  |
| 570 | IPI00230212.3 | 26067 | LYSEFLGK                 | 478.7579  | 2 | 31 | y6     | 82.7 | 113.7 |
| 571 | IPI00230212.3 | 26067 | MAHWSNK                  | 437.2055  | 2 | 28 | y4     | 15.6 | 43.6  |

|     |               |       |                      |           |   |    |        |      |       |
|-----|---------------|-------|----------------------|-----------|---|----|--------|------|-------|
| 572 | IPI00230212.3 | 26067 | MLLEYTDSSYDEK        | 797.3535  | 2 | 37 |        | 0.0  | 37.0  |
| 573 | IPI00230212.3 | 26067 | PMILGYWNVN           | 624.8310  | 2 | 54 | y6     | 27.2 | 81.2  |
| 574 | IPI00230212.3 | 26067 | PMILGYWNVN           | 624.8324  | 2 | 59 | y6     | 41.0 | 100.0 |
| 575 | IPI00230212.3 | 26067 | RPWFAGDK             | 488.7536  | 2 | 24 | c b7   | 12.9 | 36.9  |
| 576 | IPI00230212.3 | 26067 | RYTMGDAPDFDR         | 481.8829  | 3 | 35 | c b7 P | 12.2 | 47.2  |
| 577 | IPI00230212.3 | 26067 | RYTMGDAPDFDR         | 722.3258  | 2 | 45 |        | 0.0  | 45.0  |
| 578 | IPI00230212.3 | 26067 | RYTMGDAPDFDRSQWLNEK  | 777.3612  | 3 | 20 | b6     | 14.6 | 34.6  |
| 579 | IPI00230212.3 | 26067 | RYTMGDAPDFDRSQWLNEK  | 777.3612  | 3 | 22 | b6     | 6.2  | 28.2  |
| 580 | IPI00230212.3 | 26067 | SQWLNEK              | 452.7299  | 2 | 21 | y5     | 69.8 | 90.8  |
| 581 | IPI00230212.3 | 26067 | VTYVDFLAYDILDQYR     | 997.9943  | 2 | 21 | y4     | 29.5 | 50.5  |
| 582 | IPI00230212.3 | 26067 | VTYVDFLAYDILDQYR     | 998.0033  | 2 | 22 | y7     | 13.7 | 35.7  |
| 583 | IPI00230212.3 | 26067 | VTYVDFLAYDILDQYR     | 998.0036  | 2 | 25 | y7     | 49.6 | 74.6  |
| 584 | IPI00230212.3 | 26067 | VTYVDFLAYDILDQYR     | 997.9991  | 2 | 26 | y7     | 33.8 | 59.8  |
| 585 | IPI00230212.3 | 26067 | VTYVDFLAYDILDQYR     | 997.9988  | 2 | 35 | y7     | 12.9 | 47.9  |
| 586 | IPI00230212.3 | 26067 | VTYVDFLAYDILDQYR     | 997.9998  | 2 | 36 |        | 0.0  | 36.0  |
| 587 | IPI00230212.3 | 26067 | VTYVDFLAYDILDQYR     | 998.0037  | 2 | 38 | y7     | 46.8 | 84.8  |
| 588 | IPI00230212.3 | 26067 | VTYVDFLAYDILDQYR     | 997.4993  | 2 | 40 | y4     | 62.3 | 102.3 |
| 589 | IPI00230212.3 | 26067 | VTYVDFLAYDILDQYR     | 998.0030  | 2 | 47 | y7     | 22.4 | 69.4  |
| 590 | IPI00230212.3 | 26067 | VTYVDFLAYDILDQYR     | 998.0032  | 2 | 55 | y6     | 14.6 | 69.6  |
| 591 | IPI00230212.3 | 26067 | VTYVDFLAYDILDQYR     | 665.3348  | 3 | 71 | y4     | 62.3 | 133.3 |
| 592 | IPI00230212.3 | 26067 | YIATPIFSK            | 520.2947  | 2 | 17 | y7     | 49.6 | 66.6  |
| 593 | IPI00230212.3 | 26067 | YIATPIFSK            | 1039.5833 | 1 | 26 | P y5   | 69.8 | 95.8  |
| 594 | IPI00230212.3 | 26067 | YIATPIFSK            | 520.2946  | 2 | 33 | P y5   | 75.6 | 108.6 |
| 595 | IPI00319994.4 | 36817 | DLADELALVDVMEDK      | 838.4086  | 2 | 50 | c b9   | 32.0 | 82.0  |
| 596 | IPI00319994.4 | 36817 | DQLIVNLLK            | 528.3266  | 2 | 43 | y5     | 69.8 | 112.8 |
| 597 | IPI00319994.4 | 36817 | FIIPNIVK             | 472.3027  | 2 | 18 | P y5   | 69.8 | 87.8  |
| 598 | IPI00319994.4 | 36817 | FIIPNIVK             | 472.3027  | 2 | 18 | y6     | 69.8 | 87.8  |
| 599 | IPI00319994.4 | 36817 | GEMMDLQHGSFLK        | 803.3920  | 2 | 58 | c b8   | 2.0  | 60.0  |
| 600 | IPI00319994.4 | 36817 | GYTSWAIGLSVADLAESIMK | 1056.5390 | 2 | 86 | y9     | 30.4 | 116.4 |
| 601 | IPI00319994.4 | 36817 | ISGFPK               | 324.6895  | 2 | 24 |        | 0.0  | 24.0  |
| 602 | IPI00319994.4 | 36817 | LKGEMMDLQHGSFLK      | 616.3261  | 3 | 22 | c b7   | 1.8  | 23.8  |
| 603 | IPI00319994.4 | 36817 | LLIVSNPVDILTYVAWK    | 973.0603  | 2 | 21 |        | 0.0  | 21.0  |
| 604 | IPI00319994.4 | 36817 | LLIVSNPVDILTYVAWK    | 649.0462  | 3 | 37 |        | 0.0  | 37.0  |
| 605 | IPI00319994.4 | 36817 | LLIVSNPVDILTYVAWK    | 649.0462  | 3 | 38 |        | 0.0  | 38.0  |
| 606 | IPI00319994.4 | 36817 | LLIVSNPVDILTYVAWK    | 973.0692  | 2 | 71 |        | 0.0  | 71.0  |
| 607 | IPI00319994.4 | 36817 | LLIVSNPVDILTYVAWK    | 973.0694  | 2 | 77 | y4     | 49.1 | 126.1 |
| 608 | IPI00319994.4 | 36817 | LLIVSNPVDILTYVAWK    | 973.0651  | 2 | 80 | y7     | 46.8 | 126.8 |
| 609 | IPI00319994.4 | 36817 | LLIVSNPVDILTYVAWK    | 973.0694  | 2 | 81 | c b6 P | 1.3  | 82.3  |
| 610 | IPI00319994.4 | 36817 | LLIVSNPVDILTYVAWK    | 972.5659  | 2 | 92 | y7     | 33.8 | 125.8 |
| 611 | IPI00319994.4 | 36817 | LNLVQR               | 371.7320  | 2 | 42 | y4     | 41.0 | 83.0  |
| 612 | IPI00319994.4 | 36817 | LVIITAGAR            | 457.2954  | 2 | 46 | y5     | 14.6 | 60.6  |

|     |               |       |                            |           |   |    |        |      |       |
|-----|---------------|-------|----------------------------|-----------|---|----|--------|------|-------|
| 613 | IPI00319994.4 | 36817 | LVIITAGAR                  | 457.2954  | 2 | 54 | y5     | 38.2 | 92.2  |
| 614 | IPI00319994.4 | 36817 | NVNIFK                     | 367.7136  | 2 | 26 |        | 0.0  | 26.0  |
| 615 | IPI00319994.4 | 36817 | NVNIFK                     | 734.4256  | 1 | 27 | c b4   | 62.3 | 89.3  |
| 616 | IPI00319994.4 | 36817 | QVVDSAYEVIK                | 625.8371  | 2 | 37 | y8     | 61.4 | 98.4  |
| 617 | IPI00319994.4 | 36817 | RVHPISTMIK                 | 394.5660  | 3 | 25 | y5     | 49.1 | 74.1  |
| 618 | IPI00319994.4 | 36817 | RVHPISTMIK                 | 591.3449  | 2 | 34 | c b8   | 12.2 | 46.2  |
| 619 | IPI00319994.4 | 36817 | SADTLWGIQK                 | 559.7958  | 2 | 45 | y4     | 57.1 | 102.1 |
| 620 | IPI00319994.4 | 36817 | SLNPELGTADADK              | 630.3091  | 2 | 51 | P y9   | 81.7 | 132.7 |
| 621 | IPI00319994.4 | 36817 | SLNPELGTADADKEQWK          | 610.9676  | 3 | 24 |        | 0.0  | 24.0  |
| 622 | IPI00319994.4 | 36817 | SLNPELGTADADKEQWK          | 915.9472  | 2 | 57 |        | 0.0  | 57.0  |
| 623 | IPI00319994.4 | 36817 | VTLTPEEEAR                 | 572.7959  | 2 | 35 | P y6   | 82.7 | 117.7 |
| 624 | IPI00319994.4 | 36817 | YLMGER                     | 768.3717  | 1 | 19 |        | 0.0  | 19.0  |
| 625 | IPI00319994.4 | 36817 | YLMGER                     | 384.6890  | 2 | 23 | y4     | 27.2 | 50.2  |
| 626 | IPI00314788.3 | 56487 | AEAERDVLFPGYTHLQR          | 668.0163  | 3 | 31 | P y++8 | 62.3 | 93.3  |
| 627 | IPI00314788.3 | 56487 | AEMQQILQGLDK               | 687.3585  | 2 | 59 | y6     | 65.2 | 124.2 |
| 628 | IPI00314788.3 | 56487 | ALLQAEQEP                  | 435.2400  | 2 | 30 | c b6   | 29.5 | 59.5  |
| 629 | IPI00314788.3 | 56487 | EFSFVQLSDAYSTGSSLMPQK      | 1162.0511 | 2 | 74 | y4     | 23.4 | 97.4  |
| 630 | IPI00314788.3 | 56487 | EFSFVQLSDAYSTGSSLMPQK      | 1162.0512 | 2 | 82 | y9     | 20.1 | 102.1 |
| 631 | IPI00314788.3 | 56487 | EFSFVQLSDAYSTGSSLMPQK      | 1162.0511 | 2 | 86 | y9     | 11.0 | 97.0  |
| 632 | IPI00314788.3 | 56487 | EFSFVQLSDAYSTGSSLMPQKK     | 817.7365  | 3 | 15 | y++16  | 49.7 | 64.7  |
| 633 | IPI00314788.3 | 56487 | ELIGEAAAGK                 | 887.4956  | 1 | 43 | y6     | 65.2 | 108.2 |
| 634 | IPI00314788.3 | 56487 | FNSSISYDR                  | 544.7537  | 2 | 49 |        | 0.0  | 49.0  |
| 635 | IPI00314788.3 | 56487 | FVGAVDPIMEK                | 603.3166  | 2 | 39 | y9     | 52.8 | 91.8  |
| 636 | IPI00314788.3 | 56487 | HLWNVDVQGSK                | 641.8308  | 2 | 49 | y8     | 44.3 | 93.3  |
| 637 | IPI00314788.3 | 56487 | KNPDSLELIR                 | 395.5597  | 3 | 33 |        | 0.0  | 33.0  |
| 638 | IPI00314788.3 | 56487 | KNPDSLELIR                 | 592.8356  | 2 | 42 | P y8   | 30.4 | 72.4  |
| 639 | IPI00314788.3 | 56487 | LHPNDEIHTANER              | 415.9474  | 4 | 23 | y++9   | 5.9  | 28.9  |
| 640 | IPI00314788.3 | 56487 | LHPNDEIHTANER              | 554.2604  | 3 | 25 | c b7   | 13.7 | 38.7  |
| 641 | IPI00314788.3 | 56487 | LLEVQK                     | 365.2289  | 2 | 25 | y5     | 69.8 | 94.8  |
| 642 | IPI00314788.3 | 56487 | LLEVQK                     | 729.4510  | 1 | 36 | y4     | 29.5 | 65.5  |
| 643 | IPI00314788.3 | 56487 | LSALLR                     | 336.7239  | 2 | 27 | y4     | 15.6 | 42.6  |
| 644 | IPI00314788.3 | 56487 | QALSPDMLATDLAYYLVR         | 1021.0311 | 2 | 49 | y7     | 12.9 | 61.9  |
| 645 | IPI00314788.3 | 56487 | QALSPDMLATDLAYYLVR         | 680.6883  | 3 | 54 | y5     | 27.2 | 81.2  |
| 646 | IPI00314788.3 | 56487 | QALSPDMLATDLAYYLVR         | 1020.5272 | 2 | 83 | y6     | 16.9 | 99.9  |
| 647 | IPI00314788.3 | 56487 | RINVLPPLGSGAIAGNPLGVDR     | 697.4015  | 3 | 38 | y8     | 30.4 | 68.4  |
| 648 | IPI00314788.3 | 56487 | RINVLPPLGSGAIAGNPLGVDRELLR | 650.8812  | 4 | 23 |        | 0.0  | 23.0  |
| 649 | IPI00314788.3 | 56487 | RINVLPPLGSGAIAGNPLGVDRELLR | 867.8375  | 3 | 32 | b5 P   | 15.6 | 47.6  |
| 650 | IPI00314788.3 | 56487 | RINVLPPLGSGAIAGNPLGVDRELLR | 651.1306  | 4 | 34 |        | 0.0  | 34.0  |
| 651 | IPI00314788.3 | 56487 | RINVLPPLGSGAIAGNPLGVDRELLR | 867.8382  | 3 | 40 | b5 P   | 25.4 | 65.4  |
| 652 | IPI00314788.3 | 56487 | SRNDQVVTDLR                | 434.8970  | 3 | 34 | y4     | 15.6 | 49.6  |
| 653 | IPI00314788.3 | 56487 | SRNDQVVTDLR                | 651.8423  | 2 | 36 | y7     | 12.9 | 48.9  |



|     |               |       |                                  |           |   |    |         |       |       |
|-----|---------------|-------|----------------------------------|-----------|---|----|---------|-------|-------|
| 654 | IPI00314788.3 | 56487 | SSVEWQIR                         | 502.7620  | 2 | 48 | y5      | 38.2  | 86.2  |
| 655 | IPI00314788.3 | 56487 | VAEWAQGTFK                       | 633.3123  | 2 | 57 | y6      | 89.0  | 146.0 |
| 656 | IPI00314788.3 | 56487 | VLIGTMVDRAEAERDVLFPGYTHLQR       | 747.6461  | 4 | 17 | P y++8  | 29.5  | 46.5  |
| 657 | IPI00319525.1 | 97825 | AKPLTDQEK                        | 536.2879  | 2 | 28 | P y7    | 95.7  | 123.7 |
| 658 | IPI00319525.1 | 97825 | APNDFNLQDFNVGDYIQAVLDRNLAENISR   | 1141.5705 | 3 | 72 |         | 0.0   | 72.0  |
| 659 | IPI00319525.1 | 97825 | APNDFNLQDFNVGDYIQAVLDRNLAENISR   | 1141.9024 | 3 | 81 | b7      | 9.6   | 90.6  |
| 660 | IPI00319525.1 | 97825 | DGMGTVFDAFPDQVAIQLNDTHPALAIPELMR | 1161.9108 | 3 | 70 | b9      | 1.6   | 71.6  |
| 661 | IPI00319525.1 | 97825 | DIINMLFYHDR                      | 479.5714  | 3 | 16 |         | 0.0   | 16.0  |
| 662 | IPI00319525.1 | 97825 | DRNVATPR                         | 464.7519  | 2 | 21 | c b6    | 6.2   | 27.2  |
| 663 | IPI00319525.1 | 97825 | FSQFLEK                          | 449.7374  | 2 | 36 |         | 0.0   | 36.0  |
| 664 | IPI00319525.1 | 97825 | HLEIYEINQK                       | 700.3868  | 2 | 41 | y6      | 77.6  | 118.6 |
| 665 | IPI00319525.1 | 97825 | HLHFTLVK                         | 332.1992  | 3 | 26 | c b6    | 1.1   | 27.1  |
| 666 | IPI00319525.1 | 97825 | IFVDIEKLPWAK                     | 486.9498  | 3 | 30 | y++8    | 0.7   | 30.7  |
| 667 | IPI00319525.1 | 97825 | IHSDIVK                          | 406.2374  | 2 | 30 | c b6    | 14.6  | 44.6  |
| 668 | IPI00319525.1 | 97825 | INPSSMFDVHVK                     | 458.5674  | 3 | 23 |         | 0.0   | 23.0  |
| 669 | IPI00319525.1 | 97825 | INPSSMFDVHVK                     | 687.3553  | 2 | 65 | P y++10 | 65.2  | 130.2 |
| 670 | IPI00319525.1 | 97825 | IREGWQVEEADDWLR                  | 634.9769  | 3 | 33 | y5      | 49.1  | 82.1  |
| 671 | IPI00319525.1 | 97825 | IREGWQVEEADDWLR                  | 634.9769  | 3 | 34 | y5      | 32.3  | 66.3  |
| 672 | IPI00319525.1 | 97825 | IVALFPK                          | 394.2578  | 2 | 27 |         | 0.0   | 27.0  |
| 673 | IPI00319525.1 | 97825 | LHSFVSDDIFLR                     | 483.5897  | 3 | 27 |         | 0.0   | 27.0  |
| 674 | IPI00319525.1 | 97825 | LITSVAEUVNNDPMPVGSK              | 625.3303  | 3 | 42 |         | 0.0   | 42.0  |
| 675 | IPI00319525.1 | 97825 | LITSVAEUVNNDPMPVGSK              | 937.4902  | 2 | 59 | P y6    | 23.8  | 82.8  |
| 676 | IPI00319525.1 | 97825 | LVIDQIDNGFFSPNPDLFK              | 1154.5881 | 2 | 47 | P y5    | 44.5  | 91.5  |
| 677 | IPI00319525.1 | 97825 | LVIDQIDNGFFSPNPDLFK              | 1154.5882 | 2 | 50 |         | 0.0   | 50.0  |
| 678 | IPI00319525.1 | 97825 | LVIDQIDNGFFSPNPDLFK              | 1154.5882 | 2 | 64 | P y5    | 57.1  | 121.1 |
| 679 | IPI00319525.1 | 97825 | MSLIEEEGGK                       | 546.7657  | 2 | 55 | y7      | 82.7  | 137.7 |
| 680 | IPI00319525.1 | 97825 | NLAENISR                         | 458.7458  | 2 | 22 | y6      | 38.2  | 60.2  |
| 681 | IPI00319525.1 | 97825 | RIHEYKR                          | 334.5264  | 3 | 26 |         | 0.0   | 26.0  |
| 682 | IPI00319525.1 | 97825 | RMSLIEEEGGK                      | 624.8165  | 2 | 48 | c b8    | 32.0  | 80.0  |
| 683 | IPI00319525.1 | 97825 | TFAYTNHTVLPEALERWPVELVEK         | 948.5002  | 3 | 29 |         | 0.0   | 29.0  |
| 684 | IPI00319525.1 | 97825 | VDDVAALDK                        | 473.2480  | 2 | 40 | y7      | 116.0 | 156.0 |
| 685 | IPI00319525.1 | 97825 | VDDVAALDKK                       | 537.2954  | 2 | 53 | y6      | 53.0  | 106.0 |
| 686 | IPI00319525.1 | 97825 | VIFLENYR                         | 527.2903  | 2 | 28 | y6      | 82.7  | 110.7 |
| 687 | IPI00319525.1 | 97825 | VIPATDLSEQISTAGTEASGTGNMK        | 827.0738  | 3 | 20 | y6      | 16.9  | 36.9  |
| 688 | IPI00319525.1 | 97825 | VIPATDLSEQISTAGTEASGTGNMK        | 827.0738  | 3 | 31 | y6      | 1.4   | 32.4  |
| 689 | IPI00319525.1 | 97825 | VSQLYMNQK                        | 555.7834  | 2 | 48 | y5      | 69.8  | 117.8 |
| 690 | IPI00319525.1 | 97825 | WPVELVEK                         | 500.2797  | 2 | 33 | y6      | 65.2  | 98.2  |
| 691 | IPI00319525.1 | 97825 | WVDTQVVLLALPYDTPVPGYMNNTVNTMR    | 1066.1959 | 3 | 32 | b8      | 6.6   | 38.6  |
| 692 | IPI00319525.1 | 97825 | WVDTQVVLLALPYDTPVPGYMNNTVNTMR    | 1065.8645 | 3 | 41 | b8      | 14.6  | 55.6  |
| 693 | IPI00319525.1 | 97825 | YEYGIFNQK                        | 581.2857  | 2 | 36 | y7      | 61.4  | 97.4  |
| 694 | IPI00110850.1 | 42052 | AGFAGDDAPR                       | 488.7276  | 2 | 61 | y7      | 25.4  | 86.4  |

|     |               |       |                       |           |   |    |         |      |       |
|-----|---------------|-------|-----------------------|-----------|---|----|---------|------|-------|
| 695 | IPI00110850.1 | 42052 | AVFPSIVGRPR           | 599.8570  | 2 | 34 | P y8    | 0.9  | 34.9  |
| 696 | IPI00110850.1 | 42052 | AVFPSIVGRPR           | 599.8570  | 2 | 34 | P y8    | 5.9  | 39.9  |
| 697 | IPI00110850.1 | 42052 | DLTDYLMK              | 998.4878  | 1 | 24 | y7      | 61.4 | 85.4  |
| 698 | IPI00110850.1 | 42052 | DLTDYLMK              | 499.7468  | 2 | 38 | y5      | 83.9 | 121.9 |
| 699 | IPI00110850.1 | 42052 | DLYANTVLSGGTTMYPGIADR | 1108.5428 | 2 | 64 | P y6    | 53.0 | 117.0 |
| 700 | IPI00110850.1 | 42052 | DLYANTVLSGGTTMYPGIADR | 1108.5427 | 2 | 69 | P y6    | 25.4 | 94.4  |
| 701 | IPI00110850.1 | 42052 | DLYANTVLSGGTTMYPGIADR | 1108.5427 | 2 | 74 | P y6    | 53.0 | 127.0 |
| 702 | IPI00110850.1 | 42052 | DLYANTVLSGGTTMYPGIADR | 1108.5427 | 2 | 84 |         | 0.0  | 84.0  |
| 703 | IPI00110850.1 | 42052 | EITALAPSTMK           | 581.3128  | 2 | 31 | y6      | 53.0 | 84.0  |
| 704 | IPI00110850.1 | 42052 | EITALAPSTMK           | 581.3128  | 2 | 31 | P y5    | 41.0 | 72.0  |
| 705 | IPI00110850.1 | 42052 | GYSFTTTAER            | 566.7675  | 2 | 50 | y8      | 2.2  | 52.2  |
| 706 | IPI00110850.1 | 42052 | GYSFTTTAEREIVR        | 543.9458  | 3 | 21 |         | 0.0  | 21.0  |
| 707 | IPI00110850.1 | 42052 | HQGVMVGMGQK           | 391.1951  | 3 | 38 | c b5    | 16.9 | 54.9  |
| 708 | IPI00110850.1 | 42052 | HQGVMVGMGQK           | 586.2891  | 2 | 44 | y9      | 66.6 | 110.6 |
| 709 | IPI00110850.1 | 42052 | IIAPPER               | 398.2398  | 2 | 24 | P y4    | 27.2 | 51.2  |
| 710 | IPI00110850.1 | 42052 | IIAPPERK              | 462.2877  | 2 | 33 | y6      | 38.2 | 71.2  |
| 711 | IPI00110850.1 | 42052 | IWHHTFYNELR           | 505.9213  | 3 | 25 |         | 0.0  | 25.0  |
| 712 | IPI00110850.1 | 42052 | IWHHTFYNELR           | 505.9213  | 3 | 49 | y4      | 41.0 | 90.0  |
| 713 | IPI00110850.1 | 42052 | LDLAGR                | 644.3736  | 1 | 26 | y4      | 32.3 | 58.3  |
| 714 | IPI00110850.1 | 42052 | LDLAGR                | 322.6900  | 2 | 33 | y4      | 29.5 | 62.5  |
| 715 | IPI00110850.1 | 42052 | LDLAGRDLTDYLMK        | 541.9524  | 3 | 23 |         | 0.0  | 23.0  |
| 716 | IPI00110850.1 | 42052 | QEYDESGPSIVHR         | 758.8584  | 2 | 21 |         | 0.0  | 21.0  |
| 717 | IPI00110850.1 | 42052 | QEYDESGPSIVHR         | 506.2393  | 3 | 48 |         | 0.0  | 48.0  |
| 718 | IPI00110850.1 | 42052 | QEYDESGPSIVHRK        | 548.9382  | 3 | 20 | y4      | 16.9 | 36.9  |
| 719 | IPI00110850.1 | 42052 | QEYDESGPSIVHRK        | 411.9548  | 4 | 20 |         | 0.0  | 20.0  |
| 720 | IPI00110850.1 | 42052 | QEYDESGPSIVHRK        | 548.9382  | 3 | 29 |         | 0.0  | 29.0  |
| 721 | IPI00110850.1 | 42052 | SYELPDGQVITIGNER      | 895.9501  | 2 | 25 |         | 0.0  | 25.0  |
| 722 | IPI00110850.1 | 42052 | SYELPDGQVITIGNER      | 896.4515  | 2 | 34 | y4      | 16.9 | 50.9  |
| 723 | IPI00110850.1 | 42052 | SYELPDGQVITIGNER      | 895.9501  | 2 | 47 | y4      | 16.9 | 63.9  |
| 724 | IPI00110850.1 | 42052 | SYELPDGQVITIGNER      | 895.9501  | 2 | 78 | y4      | 29.5 | 107.5 |
| 725 | IPI00110850.1 | 42052 | VAPEEHPVLLTEAPLNPK    | 652.0258  | 3 | 19 | P y5    | 97.9 | 116.9 |
| 726 | IPI00110850.1 | 42052 | VAPEEHPVLLTEAPLNPK    | 978.0397  | 2 | 29 | c b6 P  | 25.4 | 54.4  |
| 727 | IPI00110850.1 | 42052 | VAPEEHPVLLTEAPLNPK    | 978.0397  | 2 | 36 |         | 0.0  | 36.0  |
| 728 | IPI00323357.1 | 71055 | ARFEELNADLFR          | 494.2572  | 3 | 20 |         | 0.0  | 20.0  |
| 729 | IPI00323357.1 | 71055 | EIAEAYLGK             | 497.2668  | 2 | 37 |         | 0.0  | 37.0  |
| 730 | IPI00323357.1 | 71055 | GTLDPVEK              | 429.7327  | 2 | 16 | y6      | 38.2 | 54.2  |
| 731 | IPI00323357.1 | 71055 | HWPFMVVNDAGRPK        | 551.9489  | 3 | 27 | y++13   | 27.7 | 54.7  |
| 732 | IPI00323357.1 | 71055 | HWPFMVVNDAGRPK        | 551.9489  | 3 | 35 | P y++12 | 81.7 | 116.7 |
| 733 | IPI00323357.1 | 71055 | IINEPTAAAIAYGLDK      | 553.9699  | 3 | 36 | y5      | 89.0 | 125.0 |
| 734 | IPI00323357.1 | 71055 | IINEPTAAAIAYGLDK      | 830.4500  | 2 | 74 | y5      | 27.2 | 101.2 |
| 735 | IPI00323357.1 | 71055 | ITITNDK               | 402.7268  | 2 | 18 | y5      | 69.8 | 87.8  |

|     |               |       |                               |           |   |    |       |      |       |
|-----|---------------|-------|-------------------------------|-----------|---|----|-------|------|-------|
| 736 | IPI00323357.1 | 71055 | LLQDFFNKG                     | 541.7798  | 2 | 44 |       | 0.0  | 44.0  |
| 737 | IPI00323357.1 | 71055 | LLQDFFNKG                     | 541.2877  | 2 | 55 | y6    | 57.1 | 112.1 |
| 738 | IPI00323357.1 | 71055 | MVNHFAIEFK                    | 412.5466  | 3 | 23 | y4    | 18.5 | 41.5  |
| 739 | IPI00323357.1 | 71055 | NQTAEKEEFEHQK                 | 582.6077  | 3 | 34 |       | 0.0  | 34.0  |
| 740 | IPI00323357.1 | 71055 | NQTAEKEEFEHQK                 | 873.4166  | 2 | 46 | y4    | 29.5 | 75.5  |
| 741 | IPI00323357.1 | 71055 | QTQTFTTYSNQPGLVQVYEGER        | 925.7805  | 3 | 37 | y7    | 33.8 | 70.8  |
| 742 | IPI00323357.1 | 71055 | QTQTFTTYSNQPGLVQVYEGER        | 925.7839  | 3 | 40 | y5    | 14.6 | 54.6  |
| 743 | IPI00323357.1 | 71055 | RFDDAVVQSDMK                  | 470.8946  | 3 | 41 | c b6  | 35.8 | 76.8  |
| 744 | IPI00323357.1 | 71055 | RFDDAVVQSDMK                  | 705.8405  | 2 | 61 | c b4  | 15.6 | 76.6  |
| 745 | IPI00323357.1 | 71055 | RTLSSTQASIEIDSLYEGIDFYTSITR   | 1052.1968 | 3 | 17 |       | 0.0  | 17.0  |
| 746 | IPI00323357.1 | 71055 | RTLSSTQASIEIDSLYEGIDFYTSITR   | 1052.1954 | 3 | 19 | b4    | 1.3  | 20.3  |
| 747 | IPI00323357.1 | 71055 | SFYPEEVSSMVLTK                | 808.8966  | 2 | 53 | y++13 | 18.3 | 71.3  |
| 748 | IPI00323357.1 | 71055 | SFYPEEVSSMVLTK                | 808.8965  | 2 | 55 | y++13 | 4.7  | 59.7  |
| 749 | IPI00323357.1 | 71055 | SFYPEEVSSMVLTK                | 808.8964  | 2 | 56 | y++13 | 4.8  | 60.8  |
| 750 | IPI00323357.1 | 71055 | SINPDEAVAYGAAVQAAILSGDK       | 1131.0760 | 2 | 74 |       | 0.0  | 74.0  |
| 751 | IPI00323357.1 | 71055 | SQIHDIVLVGGSTR                | 741.4166  | 2 | 74 | y5    | 15.6 | 89.6  |
| 752 | IPI00323357.1 | 71055 | STAGDTHLGGEDFDNR              | 846.3665  | 2 | 60 | c b8  | 11.6 | 71.6  |
| 753 | IPI00323357.1 | 71055 | TVTNAVVTVPAYFNDSQR            | 661.6704  | 3 | 25 | y++12 | 38.5 | 63.5  |
| 754 | IPI00323357.1 | 71055 | TVTNAVVTVPAYFNDSQR            | 992.0062  | 2 | 29 |       | 0.0  | 29.0  |
| 755 | IPI00323357.1 | 71055 | TVTNAVVTVPAYFNDSQR            | 991.5020  | 2 | 39 |       | 0.0  | 39.0  |
| 756 | IPI00323357.1 | 71055 | VQVEYKGETK                    | 590.8137  | 2 | 38 | y8    | 58.1 | 96.1  |
| 757 | IPI00336362.1 | 55530 | EAGFPPGVNIVPGYPTAGGAISSHMDIDK | 1018.8394 | 3 | 18 |       | 0.0  | 18.0  |
| 758 | IPI00336362.1 | 55530 | EAGFPPGVNIVPGYPTAGGAISSHMDIDK | 1018.8394 | 3 | 34 | b9    | 1.3  | 35.3  |
| 759 | IPI00336362.1 | 55530 | EEIFGPVQQIMK                  | 709.8716  | 2 | 45 | c b8  | 2.0  | 47.0  |
| 760 | IPI00336362.1 | 55530 | ILGLIESGKK                    | 353.2254  | 3 | 22 | y6    | 36.1 | 58.1  |
| 761 | IPI00336362.1 | 55530 | KYILGNPLNSGINQGPQIDK          | 724.0600  | 3 | 49 | y6    | 69.8 | 118.8 |
| 762 | IPI00336362.1 | 55530 | LLLATMESMNAGK                 | 689.8575  | 2 | 75 | y6    | 82.7 | 157.7 |
| 763 | IPI00336362.1 | 55530 | RANNTTYGLAAGVFTK              | 561.9665  | 3 | 20 | y5    | 29.5 | 49.5  |
| 764 | IPI00336362.1 | 55530 | TVAMQISQK                     | 503.2740  | 2 | 58 | y7    | 95.7 | 153.7 |
| 765 | IPI00336362.1 | 55530 | VSFTGSTVEGK                   | 556.2850  | 2 | 49 | y7    | 49.6 | 98.6  |
| 766 | IPI00336362.1 | 55530 | YILGNPLNSGINQGPQIDK           | 1021.0429 | 2 | 48 | y8    | 19.2 | 67.2  |
| 767 | IPI00230440.3 | 48156 | AGIPVFAWK                     | 494.7850  | 2 | 46 | P y6  | 75.6 | 121.6 |
| 768 | IPI00230440.3 | 48156 | ALDIAENEMPGLMR                | 780.3818  | 2 | 23 | P y5  | 57.1 | 80.1  |
| 769 | IPI00230440.3 | 48156 | ALDIAENEMPGLMR                | 780.8837  | 2 | 41 | P y5  | 27.2 | 68.2  |
| 770 | IPI00230440.3 | 48156 | DGPLNMILDDGGDLTNIHTK          | 751.7151  | 3 | 28 |       | 0.0  | 28.0  |
| 771 | IPI00230440.3 | 48156 | DGPLNMILDDGGDLTNIHTK          | 1127.0659 | 2 | 66 | y8    | 22.4 | 88.4  |
| 772 | IPI00230440.3 | 48156 | DGPLNMILDDGGDLTNIHTK          | 1127.0720 | 2 | 71 |       | 0.0  | 71.0  |
| 773 | IPI00230440.3 | 48156 | DGPLNMILDDGGDLTNIHTK          | 1127.0716 | 2 | 77 | y5    | 7.7  | 84.7  |
| 774 | IPI00230440.3 | 48156 | EMYSASKPLK                    | 577.2996  | 2 | 26 | y7    | 46.8 | 72.8  |
| 775 | IPI00230440.3 | 48156 | ESLIDGIK                      | 437.7480  | 2 | 36 |       | 0.0  | 36.0  |
| 776 | IPI00230440.3 | 48156 | HFEQMK                        | 410.1948  | 2 | 22 | y4    | 44.5 | 66.5  |

|     |               |       |                          |           |   |    |       |      |       |
|-----|---------------|-------|--------------------------|-----------|---|----|-------|------|-------|
| 777 | IPI00230440.3 | 48156 | IILLAEGR                 | 442.7822  | 2 | 53 | y6    | 77.6 | 130.6 |
| 778 | IPI00230440.3 | 48156 | KLDEAVAEHLGK             | 460.9209  | 3 | 48 | y7    | 65.2 | 113.2 |
| 779 | IPI00230440.3 | 48156 | KLDEAVAEHLGK             | 460.9209  | 3 | 57 | y7    | 49.6 | 106.6 |
| 780 | IPI00230440.3 | 48156 | KLDEAVAEHLGK             | 690.8796  | 2 | 89 | y7    | 65.2 | 154.2 |
| 781 | IPI00230440.3 | 48156 | MREMYSASK                | 368.1722  | 3 | 22 | y5    | 41.0 | 63.0  |
| 782 | IPI00230440.3 | 48156 | MREMYSASK                | 551.7551  | 2 | 37 | b8    | 33.8 | 70.8  |
| 783 | IPI00230440.3 | 48156 | MREMYSASKPLK             | 720.8748  | 2 | 40 | c b7  | 13.7 | 53.7  |
| 784 | IPI00230440.3 | 48156 | MREMYSASKPLK             | 480.9168  | 3 | 50 | c b4  | 29.5 | 79.5  |
| 785 | IPI00230440.3 | 48156 | RATDVMIAAGK              | 531.2924  | 2 | 34 | c b7  | 12.2 | 46.2  |
| 786 | IPI00230440.3 | 48156 | RATDVMIAAGK              | 354.5309  | 3 | 34 | b4    | 27.2 | 61.2  |
| 787 | IPI00230440.3 | 48156 | SDKLPYK                  | 446.7428  | 2 | 35 |       | 0.0  | 35.0  |
| 788 | IPI00230440.3 | 48156 | SDKLPYK                  | 446.7428  | 2 | 39 | y4    | 62.3 | 101.3 |
| 789 | IPI00230440.3 | 48156 | VADIGLAAWGR              | 564.8123  | 2 | 58 | y7    | 12.9 | 70.9  |
| 790 | IPI00230440.3 | 48156 | VADIGLAAWGR              | 564.8123  | 2 | 63 | y7    | 69.8 | 132.8 |
| 791 | IPI00230440.3 | 48156 | VADIGLAAWGRK             | 419.5751  | 3 | 34 |       | 0.0  | 34.0  |
| 792 | IPI00230440.3 | 48156 | VAVVAGYGDVGK             | 567.8122  | 2 | 60 | y7    | 61.4 | 121.4 |
| 793 | IPI00230440.3 | 48156 | VNIKPQVDR                | 356.8772  | 3 | 20 |       | 0.0  | 20.0  |
| 794 | IPI00230440.3 | 48156 | VNIKPQVDRYWLK            | 553.9848  | 3 | 17 | y++12 | 10.5 | 27.5  |
| 795 | IPI00230440.3 | 48156 | WLNENAVEK                | 1102.5532 | 1 | 17 |       | 0.0  | 17.0  |
| 796 | IPI00230440.3 | 48156 | YPQLLSGIR                | 523.8061  | 2 | 41 | y7    | 46.8 | 87.8  |
| 797 | IPI00230440.3 | 48156 | YPQLLSGIR                | 523.8033  | 2 | 51 | y5    | 13.7 | 64.7  |
| 798 | IPI00230440.3 | 48156 | YPVGVHFLPK               | 578.8298  | 2 | 42 | c b8  | 32.0 | 74.0  |
| 799 | IPI00126120.1 | 24431 | DGGQQFTEEFQTLNPMK        | 985.9517  | 2 | 44 | y4    | 49.1 | 93.1  |
| 800 | IPI00126120.1 | 24431 | DGGQQFTEEFQTLNPMK        | 985.4508  | 2 | 58 | y4    | 44.5 | 102.5 |
| 801 | IPI00126120.1 | 24431 | DGGQQFTEEFQTLNPMK        | 985.9513  | 2 | 72 | y4    | 41.0 | 113.0 |
| 802 | IPI00126120.1 | 24431 | DGGQQFTEEFQTLNPMK        | 985.4509  | 2 | 79 | y7    | 1.6  | 80.6  |
| 803 | IPI00126120.1 | 24431 | ELLALEVFQVSHPR           | 546.6388  | 3 | 31 |       | 0.0  | 31.0  |
| 804 | IPI00126120.1 | 24431 | ELLALEVFQVSHPR           | 819.4569  | 2 | 68 | y8    | 32.0 | 100.0 |
| 805 | IPI00126120.1 | 24431 | ELLALEVFQVSHPR           | 819.4570  | 2 | 76 | y7    | 35.8 | 111.8 |
| 806 | IPI00126120.1 | 24431 | FKVDLSPYPTISHINK         | 620.3407  | 3 | 37 | P y8  | 20.1 | 57.1  |
| 807 | IPI00126120.1 | 24431 | IALALK                   | 628.4412  | 1 | 28 |       | 0.0  | 28.0  |
| 808 | IPI00126120.1 | 24431 | IALALK                   | 314.7234  | 2 | 34 | y5    | 97.9 | 131.9 |
| 809 | IPI00126120.1 | 24431 | IDGITIVQSLAIMEYLEETRPIPR | 920.1692  | 3 | 22 | y++16 | 8.1  | 30.1  |
| 810 | IPI00126120.1 | 24431 | IDGITIVQSLAIMEYLEETRPIPR | 920.1692  | 3 | 25 | b6    | 1.1  | 26.1  |
| 811 | IPI00126120.1 | 24431 | IDGITIVQSLAIMEYLEETRPIPR | 920.1658  | 3 | 41 |       | 0.0  | 41.0  |
| 812 | IPI00126120.1 | 24431 | IDGITIVQSLAIMEYLEETRPIPR | 920.1690  | 3 | 44 | y++14 | 26.5 | 70.5  |
| 813 | IPI00126120.1 | 24431 | ILQSTAGK                 | 409.2428  | 2 | 30 | y5    | 35.8 | 65.8  |
| 814 | IPI00126120.1 | 24431 | ILQSTAGK                 | 817.4809  | 1 | 38 | y5    | 25.4 | 63.4  |
| 815 | IPI00126120.1 | 24431 | MISDLIASGIQPLQNLVSK      | 714.4094  | 3 | 43 | b6    | 65.2 | 108.2 |
| 816 | IPI00126120.1 | 24431 | MISDLIASGIQPLQNLVSK      | 714.0763  | 3 | 47 | b9    | 6.6  | 53.6  |
| 817 | IPI00126120.1 | 24431 | MISDLIASGIQPLQNLVSK      | 1079.1058 | 2 | 63 | c b6  | 7.1  | 70.1  |

|     |               |       |                            |           |   |    |        |       |       |
|-----|---------------|-------|----------------------------|-----------|---|----|--------|-------|-------|
| 818 | IPI00126120.1 | 24431 | MISDLIASGIQPLQNLVSVLK      | 1071.1083 | 2 | 84 |        | 0.0   | 84.0  |
| 819 | IPI00126120.1 | 24431 | MISDLIASGIQPLQNLVSVLK      | 1071.1082 | 2 | 95 |        | 0.0   | 95.0  |
| 820 | IPI00126120.1 | 24431 | MQAGKPILYSYFR              | 808.4173  | 2 | 62 | y5     | 1.1   | 63.1  |
| 821 | IPI00126120.1 | 24431 | QVGQENQMOWAQK              | 787.8793  | 2 | 36 | y4     | 36.1  | 72.1  |
| 822 | IPI00126120.1 | 24431 | RQPDTPAELRT                | 642.3380  | 2 | 20 | y7     | 46.8  | 66.8  |
| 823 | IPI00126120.1 | 24431 | RQPDTPAELRT                | 642.3380  | 2 | 22 | c b4   | 29.5  | 51.5  |
| 824 | IPI00126120.1 | 24431 | RQPDTPAELRT                | 428.5622  | 3 | 25 | c b5 P | 25.4  | 50.4  |
| 825 | IPI00126120.1 | 24431 | VITSGFNALEK                | 589.8252  | 2 | 50 | y9     | 20.1  | 70.1  |
| 826 | IPI00169463.1 | 50255 | ALTVPELTQQMFDK             | 846.4363  | 2 | 34 | y5     | 38.2  | 72.2  |
| 827 | IPI00169463.1 | 50255 | ALTVPELTQQMFDK             | 846.4363  | 2 | 49 | y4     | 25.4  | 74.4  |
| 828 | IPI00169463.1 | 50255 | AVLVDLEPGTMDSVR            | 801.4174  | 2 | 27 | P y8   | 30.4  | 57.4  |
| 829 | IPI00169463.1 | 50255 | AVLVDLEPGTMDSVR            | 801.4113  | 2 | 36 | P y8   | 30.4  | 66.4  |
| 830 | IPI00169463.1 | 50255 | AVLVDLEPGTMDSVR            | 801.4143  | 2 | 42 | P y8   | 58.1  | 100.1 |
| 831 | IPI00169463.1 | 50255 | EVDEQMLNVQNK               | 723.8561  | 2 | 33 | y5     | 25.4  | 58.4  |
| 832 | IPI00169463.1 | 50255 | IMNTFSVVPSPK               | 660.3591  | 2 | 60 | y5     | 41.0  | 101.0 |
| 833 | IPI00169463.1 | 50255 | INVYYNEATGGK               | 664.8299  | 2 | 48 | y8     | 66.6  | 114.6 |
| 834 | IPI00169463.1 | 50255 | IREEYPDR                   | 359.8493  | 3 | 22 | c b5 P | 14.6  | 36.6  |
| 835 | IPI00169463.1 | 50255 | IREEYPDR                   | 539.2700  | 2 | 29 | c b7   | 33.8  | 62.8  |
| 836 | IPI00169463.1 | 50255 | LAVNMVPFPR                 | 572.3211  | 2 | 60 | P y4   | 15.6  | 75.6  |
| 837 | IPI00169463.1 | 50255 | LHFFMPGFAPLTSR             | 540.9506  | 3 | 39 | P y5   | 102.5 | 141.5 |
| 838 | IPI00169463.1 | 50255 | NSSYFVEWIPNNVK             | 848.9181  | 2 | 58 | P y5   | 53.0  | 111.0 |
| 839 | IPI00169463.1 | 50255 | RISEQFTAMFR                | 462.5716  | 3 | 26 | y4     | 41.0  | 67.0  |
| 840 | IPI00169463.1 | 50255 | RISEQFTAMFR                | 693.3528  | 2 | 48 | c b4   | 29.5  | 77.5  |
| 841 | IPI00169463.1 | 50255 | SGPFGQIFRPDNFVFGQSGAGNNWAK | 934.1207  | 3 | 39 | y9     | 32.0  | 71.0  |
| 842 | IPI00169463.1 | 50255 | SGPFGQIFRPDNFVFGQSGAGNNWAK | 933.7877  | 3 | 58 | y8     | 6.2   | 64.2  |
| 843 | IPI00169463.1 | 50255 | SGPFGQIFRPDNFVFGQSGAGNNWAK | 933.7876  | 3 | 60 | y6     | 7.1   | 67.1  |
| 844 | IPI00169463.1 | 50255 | SGPFGQIFRPDNFVFGQSGAGNNWAK | 933.7873  | 3 | 72 | y8     | 5.6   | 77.6  |
| 845 | IPI00131695.3 | 70700 | ALVSSVR                    | 731.4420  | 1 | 16 |        | 0.0   | 16.0  |
| 846 | IPI00131695.3 | 70700 | ALVSSVR                    | 366.2241  | 2 | 33 | y5     | 65.2  | 98.2  |
| 847 | IPI00131695.3 | 70700 | APQVSTPTLVEAAR             | 480.6004  | 3 | 35 | y4     | 44.5  | 79.5  |
| 848 | IPI00131695.3 | 70700 | APQVSTPTLVEAAR             | 720.3994  | 2 | 40 | P y8   | 58.1  | 98.1  |
| 849 | IPI00131695.3 | 70700 | AWAVAR                     | 337.1925  | 2 | 28 | y4     | 44.5  | 72.5  |
| 850 | IPI00131695.3 | 70700 | AWAVAR                     | 673.3776  | 1 | 44 |        | 0.0   | 44.0  |
| 851 | IPI00131695.3 | 70700 | DVFLGTFLYEYSR              | 805.4067  | 2 | 40 | y6     | 6.6   | 46.6  |
| 852 | IPI00131695.3 | 70700 | DVFLGTFLYEYSR              | 805.3989  | 2 | 53 |        | 0.0   | 53.0  |
| 853 | IPI00131695.3 | 70700 | ENPTTFMGHYLHEVAR           | 951.9530  | 2 | 51 | y7     | 53.0  | 104.0 |
| 854 | IPI00131695.3 | 70700 | GLVLIAFSQYLQK              | 740.9341  | 2 | 31 |        | 0.0   | 31.0  |
| 855 | IPI00131695.3 | 70700 | GLVLIAFSQYLQK              | 740.9342  | 2 | 39 | y7     | 77.6  | 116.6 |
| 856 | IPI00131695.3 | 70700 | GLVLIAFSQYLQK              | 740.9341  | 2 | 41 |        | 0.0   | 41.0  |
| 857 | IPI00131695.3 | 70700 | GLVLIAFSQYLQK              | 493.9574  | 3 | 49 | c b6   | 0.9   | 49.9  |
| 858 | IPI00131695.3 | 70700 | KQTALAELVK                 | 550.8379  | 2 | 25 | y9     | 30.4  | 55.4  |

|     |               |       |                          |           |   |    |        |       |       |
|-----|---------------|-------|--------------------------|-----------|---|----|--------|-------|-------|
| 859 | IPI00131695.3 | 70700 | KQTALAEVLK               | 367.5606  | 3 | 57 | c b4   | 9.6   | 66.6  |
| 860 | IPI00131695.3 | 70700 | KYEATLEK                 | 491.2668  | 2 | 33 | y7     | 102.9 | 135.9 |
| 861 | IPI00131695.3 | 70700 | LATDLTK                  | 381.2239  | 2 | 31 | y6     | 69.8  | 100.8 |
| 862 | IPI00131695.3 | 70700 | LGEYGFQNAILVR            | 740.3997  | 2 | 60 | y7     | 33.8  | 93.8  |
| 863 | IPI00131695.3 | 70700 | LGEYGFQNAILVR            | 740.3998  | 2 | 66 | y6     | 41.0  | 107.0 |
| 864 | IPI00131695.3 | 70700 | LSQTFPNADFAEITK          | 841.4228  | 2 | 20 | c b5 P | 15.6  | 35.6  |
| 865 | IPI00131695.3 | 70700 | LSQTFPNADFAEITK          | 841.4229  | 2 | 32 | c b5 P | 6.2   | 38.2  |
| 866 | IPI00131695.3 | 70700 | LVQEVTDFAK               | 575.3114  | 2 | 38 | y8     | 44.3  | 82.3  |
| 867 | IPI00131695.3 | 70700 | LVQEVTDFAK               | 575.3113  | 2 | 53 | y8     | 33.8  | 86.8  |
| 868 | IPI00131695.3 | 70700 | QTALAEVLK                | 486.7901  | 2 | 54 | y5     | 69.8  | 123.8 |
| 869 | IPI00131695.3 | 70700 | RHPDYSVSLLLR             | 485.9404  | 3 | 54 | y5     | 57.1  | 111.1 |
| 870 | IPI00131695.3 | 70700 | RHPDYSVSLLLR             | 485.9404  | 3 | 62 | y5     | 69.8  | 131.8 |
| 871 | IPI00131695.3 | 70700 | SEIAHR                   | 356.6906  | 2 | 44 | y4     | 15.6  | 59.6  |
| 872 | IPI00131695.3 | 70700 | SEIAHRYNDLGEQHFK         | 648.6508  | 3 | 34 | y6     | 25.4  | 59.4  |
| 873 | IPI00131695.3 | 70700 | SLHTLFGDK                | 509.2724  | 2 | 25 | y6     | 89.0  | 114.0 |
| 874 | IPI00131695.3 | 70700 | SLHTLFGDK                | 339.8502  | 3 | 27 |        | 0.0   | 27.0  |
| 875 | IPI00131695.3 | 70700 | SLHTLFGDK                | 509.2724  | 2 | 34 | y7     | 61.4  | 95.4  |
| 876 | IPI00131695.3 | 70700 | TPVSEHVTK                | 333.1821  | 3 | 24 | y6     | 29.5  | 53.5  |
| 877 | IPI00131695.3 | 70700 | TPVSEHVTK                | 499.2691  | 2 | 50 | y6     | 49.6  | 99.6  |
| 878 | IPI00131695.3 | 70700 | YNDLGEQHFK               | 417.5319  | 3 | 16 | y++8   | 41.0  | 57.0  |
| 879 | IPI00131695.3 | 70700 | YNDLGEQHFK               | 625.7944  | 2 | 48 | y7     | 33.8  | 81.8  |
| 880 | IPI00131695.3 | 70700 | YNDLGEQHFK               | 625.7944  | 2 | 50 | y6     | 57.1  | 107.1 |
| 881 | IPI00310669.2 | 63475 | AAPTEPPEAPEATAAGGVTSK    | 976.4843  | 2 | 64 | c b9 P | 5.4   | 69.4  |
| 882 | IPI00310669.2 | 63475 | AILEVLQTQGA              | 571.8251  | 2 | 56 | c b6   | 75.6  | 131.6 |
| 883 | IPI00310669.2 | 63475 | AIQGWLK                  | 408.2421  | 2 | 28 | y4     | 62.3  | 90.3  |
| 884 | IPI00310669.2 | 63475 | ASYISSAQLDQPDGAVAAAAAIFR | 807.4158  | 3 | 56 | y5     | 29.5  | 85.5  |
| 885 | IPI00310669.2 | 63475 | ASYISSAQLDQPDGAVAAAAAIFR | 1210.6153 | 2 | 73 | c b9   | 11.0  | 84.0  |
| 886 | IPI00310669.2 | 63475 | ASYISSAQLDQPDGAVAAAAAIFR | 1210.6158 | 2 | 76 | y5     | 29.5  | 105.5 |
| 887 | IPI00310669.2 | 63475 | AVAQAGTVGTLLIVK          | 720.9418  | 2 | 78 | y7     | 46.8  | 124.8 |
| 888 | IPI00310669.2 | 63475 | GRVALLSGGGSGHEPAHAGFIGK  | 544.5413  | 4 | 26 | y++12  | 30.4  | 56.4  |
| 889 | IPI00310669.2 | 63475 | LIDAETAK                 | 481.2636  | 2 | 43 | y7     | 65.2  | 108.2 |
| 890 | IPI00310669.2 | 63475 | LSVLLLR                  | 471.8031  | 2 | 52 | y4     | 27.2  | 79.2  |
| 891 | IPI00310669.2 | 63475 | MGGSSGALYGLFLTAAQPLK     | 1027.5414 | 2 | 39 | y7     | 14.6  | 53.6  |
| 892 | IPI00310669.2 | 63475 | NYTGDRLNFLGLAMEQAK       | 643.3182  | 3 | 18 |        | 0.0   | 18.0  |
| 893 | IPI00310669.2 | 63475 | QMALVLDR                 | 473.2630  | 2 | 33 | y4     | 27.2  | 60.2  |
| 894 | IPI00310669.2 | 63475 | SAEAAAATK                | 474.7355  | 2 | 69 | y8     | 95.7  | 164.7 |
| 895 | IPI00310669.2 | 63475 | SPGASLLPVLTk             | 591.8640  | 2 | 62 | y6     | 111.9 | 173.9 |
| 896 | IPI00310669.2 | 63475 | TDLPTWSAAMDAGLESMQK      | 1026.9814 | 2 | 32 | y9     | 46.8  | 78.8  |
| 897 | IPI00310669.2 | 63475 | TMLDSLWAAAQEFQAWK        | 665.9971  | 3 | 33 |        | 0.0   | 33.0  |
| 898 | IPI00310669.2 | 63475 | TMLDSLWAAAQEFQAWK        | 666.3281  | 3 | 35 | c b8   | 2.0   | 37.0  |
| 899 | IPI00310669.2 | 63475 | TMLDSLWAAAQEFQAWK        | 998.9846  | 2 | 50 |        | 0.0   | 50.0  |

|     |               |       |                       |           |   |     |        |      |       |
|-----|---------------|-------|-----------------------|-----------|---|-----|--------|------|-------|
| 900 | IPI00310669.2 | 63475 | TMLDSLWAAQEFQAWK      | 998.9844  | 2 | 56  | c b8   | 12.2 | 68.2  |
| 901 | IPI00310669.2 | 63475 | VAGALAEEGMGLLEEITK    | 859.4375  | 2 | 90  | y7     | 82.7 | 172.7 |
| 902 | IPI00310669.2 | 63475 | VALLSGGGSGHEPAHAGFIGK | 491.2611  | 4 | 18  | y6     | 6.2  | 24.2  |
| 903 | IPI00310669.2 | 63475 | VALLSGGGSGHEPAHAGFIGK | 654.6787  | 3 | 20  | y++17  | 78.0 | 98.0  |
| 904 | IPI00310669.2 | 63475 | VALRSDLDTLK           | 615.8555  | 2 | 36  | c b8   | 32.0 | 68.0  |
| 905 | IPI00310669.2 | 63475 | VSVTGRK               | 373.7299  | 2 | 29  | y4     | 7.7  | 36.7  |
| 906 | IPI00134950.1 | 33110 | AHMTLDYTVQVPGTGR      | 615.6528  | 3 | 25  | P y5   | 41.0 | 66.0  |
| 907 | IPI00134950.1 | 33110 | AHMTLDYTVQVPGTGR      | 923.4741  | 2 | 53  | P y5   | 15.6 | 68.6  |
| 908 | IPI00134950.1 | 33110 | AHMTLDYTVQVPGTGR      | 922.9694  | 2 | 72  | c b7   | 29.5 | 101.5 |
| 909 | IPI00134950.1 | 33110 | AWLLGLLR              | 471.3006  | 2 | 41  | y6     | 69.8 | 110.8 |
| 910 | IPI00134950.1 | 33110 | AWLLGLLR              | 471.3006  | 2 | 46  | y6     | 53.0 | 99.0  |
| 911 | IPI00134950.1 | 33110 | AWLLGLLR              | 471.3005  | 2 | 54  | y6     | 65.2 | 119.2 |
| 912 | IPI00134950.1 | 33110 | DGSPGFSK              | 794.3681  | 1 | 16  | y7     | 33.8 | 49.8  |
| 913 | IPI00134950.1 | 33110 | DITTSVLTVNNK          | 652.8562  | 2 | 61  | y5     | 57.1 | 118.1 |
| 914 | IPI00134950.1 | 33110 | DITTSVLTVNNK          | 652.8581  | 2 | 61  | y6     | 49.6 | 110.6 |
| 915 | IPI00134950.1 | 33110 | EPSFDNWWIEEANWLTLDK   | 1154.0550 | 2 | 51  |        | 0.0  | 51.0  |
| 916 | IPI00134950.1 | 33110 | NIASMVRPGGLLVIDHR     | 463.0129  | 4 | 17  |        | 0.0  | 17.0  |
| 917 | IPI00134950.1 | 33110 | NIASMVRPGGLLVIDHR     | 462.7624  | 4 | 18  |        | 0.0  | 18.0  |
| 918 | IPI00134950.1 | 33110 | NIASMVRPGGLLVIDHR     | 617.0154  | 3 | 25  | y4     | 15.6 | 40.6  |
| 919 | IPI00134950.1 | 33110 | NIASMVRPGGLLVIDHR     | 616.6809  | 3 | 35  | y5     | 16.9 | 51.9  |
| 920 | IPI00134950.1 | 33110 | RKEPSFDNWWIEEANWLTLDK | 648.5814  | 4 | 24  | y4     | 62.3 | 86.3  |
| 921 | IPI00134950.1 | 33110 | RKEPSFDNWWIEEANWLTLDK | 648.3298  | 4 | 25  | y5     | 62.3 | 87.3  |
| 922 | IPI00134950.1 | 33110 | RKEPSFDNWWIEEANWLTLDK | 648.5797  | 4 | 26  | y4     | 41.0 | 67.0  |
| 923 | IPI00134950.1 | 33110 | RKEPSFDNWWIEEANWLTLDK | 648.5796  | 4 | 30  |        | 0.0  | 30.0  |
| 924 | IPI00134950.1 | 33110 | RKEPSFDNWWIEEANWLTLDK | 648.5797  | 4 | 37  | y4     | 83.9 | 120.9 |
| 925 | IPI00134950.1 | 33110 | RKEPSFDNWWIEEANWLTLDK | 864.4373  | 3 | 44  | y7     | 22.4 | 66.4  |
| 926 | IPI00134950.1 | 33110 | RKEPSFDNWWIEEANWLTLDK | 864.4374  | 3 | 66  |        | 0.0  | 66.0  |
| 927 | IPI00134950.1 | 33110 | RKEPSFDNWWIEEANWLTLDK | 864.4372  | 3 | 68  | y4     | 49.1 | 117.1 |
| 928 | IPI00134950.1 | 33110 | SLGVAAEGLPDQYADGEAAR  | 995.4746  | 2 | 78  | c b9 P | 12.9 | 90.9  |
| 929 | IPI00134950.1 | 33110 | SLGVAAEGLPDQYADGEAAR  | 995.4778  | 2 | 78  | c b9 P | 44.3 | 122.3 |
| 930 | IPI00134950.1 | 33110 | VDSVYR                | 780.3964  | 1 | 16  | y4     | 27.2 | 43.2  |
| 931 | IPI00134950.1 | 33110 | VWQLYIGDTR            | 625.8304  | 2 | 56  | y8     | 5.2  | 61.2  |
| 932 | IPI00134950.1 | 33110 | VWQLYIGDTR            | 625.8304  | 2 | 65  | y6     | 22.4 | 87.4  |
| 933 | IPI00330805.1 | 50010 | MAATFIGNSTAIQELFK     | 929.9778  | 2 | 83  | y5     | 49.1 | 132.1 |
| 934 | IPI00330805.1 | 50010 | MAATFIGNSTAIQELFK     | 929.9779  | 2 | 85  | y7     | 22.4 | 107.4 |
| 935 | IPI00330805.1 | 50010 | MAATFIGNSTAIQELFK     | 929.4757  | 2 | 88  |        | 0.0  | 88.0  |
| 936 | IPI00330805.1 | 50010 | MAATFIGNSTAIQELFK     | 929.9779  | 2 | 103 | y5     | 44.5 | 147.5 |
| 937 | IPI00111950.1 | 37423 | DIVLVAYSALGSHR        | 500.9437  | 3 | 30  | y++9   | 7.1  | 37.1  |
| 938 | IPI00111950.1 | 37423 | ENMQVFEFQLTSEDMDK     | 988.9413  | 2 | 69  | y6     | 53.0 | 122.0 |
| 939 | IPI00111950.1 | 37423 | ENMQVFEFQLTSEDMDK     | 988.4429  | 2 | 72  | y6     | 25.4 | 97.4  |
| 940 | IPI00111950.1 | 37423 | ENMQVFEFQLTSEDMDK     | 988.9412  | 2 | 75  |        | 0.0  | 75.0  |

|     |               |       |                             |           |   |    |       |      |       |
|-----|---------------|-------|-----------------------------|-----------|---|----|-------|------|-------|
| 941 | IPI00111950.1 | 37423 | GVVVLAK                     | 343.2343  | 2 | 23 | y4    | 75.6 | 98.6  |
| 942 | IPI00111950.1 | 37423 | HIDSASMYQNEK                | 474.8828  | 3 | 24 | y5    | 69.8 | 93.8  |
| 943 | IPI00111950.1 | 37423 | HIDSASMYQNEK                | 711.8215  | 2 | 51 | y5    | 38.2 | 89.2  |
| 944 | IPI00111950.1 | 37423 | IADGTVKR                    | 430.2536  | 2 | 38 | y5    | 27.2 | 65.2  |
| 945 | IPI00111950.1 | 37423 | KYNRTPALIALR                | 472.6217  | 3 | 24 |       | 0.0  | 24.0  |
| 946 | IPI00111950.1 | 37423 | QLQLDYVDLYLIHFPMAMKPGENYLPK | 1080.2218 | 3 | 31 |       | 0.0  | 31.0  |
| 947 | IPI00111950.1 | 37423 | QLQLDYVDLYLIHFPMAMKPGENYLPK | 1079.8891 | 3 | 41 | P y8  | 21.2 | 62.2  |
| 948 | IPI00111950.1 | 37423 | QWVDQSSPVLLDNPVLGSMK        | 1143.0894 | 2 | 66 | y6    | 14.6 | 80.6  |
| 949 | IPI00111950.1 | 37423 | QWVDQSSPVLLDNPVLGSMK        | 1143.0896 | 2 | 76 | P y8  | 5.4  | 81.4  |
| 950 | IPI00111950.1 | 37423 | QWVDQSSPVLLDNPVLGSMK        | 1143.0894 | 2 | 80 | P y8  | 33.8 | 113.8 |
| 951 | IPI00111950.1 | 37423 | QWVDQSSPVLLDNPVLGSMK        | 1143.0890 | 2 | 81 | P y8  | 21.2 | 102.2 |
| 952 | IPI00111950.1 | 37423 | REDIFYTSK                   | 579.7935  | 2 | 42 | c b5  | 27.2 | 69.2  |
| 953 | IPI00111950.1 | 37423 | SIGVSNFNRR                  | 497.2595  | 2 | 39 | y5    | 29.5 | 68.5  |
| 954 | IPI00111950.1 | 37423 | SIGVSNFNRR                  | 383.8757  | 3 | 15 | y++8  | 15.6 | 30.6  |
| 955 | IPI00111950.1 | 37423 | SIGVSNFNRR                  | 575.3097  | 2 | 21 |       | 0.0  | 21.0  |
| 956 | IPI00111950.1 | 37423 | SIGVSNFNRR                  | 575.3110  | 2 | 25 |       | 0.0  | 25.0  |
| 957 | IPI00111950.1 | 37423 | TPALIALR                    | 427.7771  | 2 | 58 | y6    | 25.4 | 83.4  |
| 958 | IPI00111950.1 | 37423 | VLDDLK                      | 408.7271  | 2 | 35 | y5    | 53.0 | 88.0  |
| 959 | IPI00111950.1 | 37423 | YISGSSFK                    | 444.7269  | 2 | 24 | y6    | 25.4 | 49.4  |
| 960 | IPI00321617.1 | 63045 | AKPNEVVFLDDFGSNLKPAP        | 555.0467  | 4 | 26 | y++9  | 23.8 | 49.8  |
| 961 | IPI00321617.1 | 63045 | AKPNEVVFLDDFGSNLKPAP        | 740.0608  | 3 | 36 |       | 0.0  | 36.0  |
| 962 | IPI00321617.1 | 63045 | ASDETGFIAVHK                | 637.8227  | 2 | 59 | y++10 | 49.6 | 108.6 |
| 963 | IPI00321617.1 | 63045 | ATEIGGILVNTPEDPNLSK         | 985.0207  | 2 | 53 | c b10 | 27.7 | 80.7  |
| 964 | IPI00321617.1 | 63045 | ATEIGGILVNTPEDPNLSK         | 984.5164  | 2 | 54 | P y5  | 53.0 | 107.0 |
| 965 | IPI00321617.1 | 63045 | AVASLNTPFMPPDPDVSPMK        | 1058.0221 | 2 | 30 |       | 0.0  | 30.0  |
| 966 | IPI00321617.1 | 63045 | AVASLNTPFMPPDPDVSPMK        | 1058.0218 | 2 | 41 |       | 0.0  | 41.0  |
| 967 | IPI00321617.1 | 63045 | AVASLNTPFMPPDPDVSPMK        | 1058.0218 | 2 | 43 |       | 0.0  | 43.0  |
| 968 | IPI00321617.1 | 63045 | AVASLNTPFMPPDPDVSPMK        | 1058.0225 | 2 | 58 |       | 0.0  | 58.0  |
| 969 | IPI00321617.1 | 63045 | DFLLGAYQTEFPEGPTQLMK        | 805.7255  | 3 | 30 |       | 0.0  | 30.0  |
| 970 | IPI00321617.1 | 63045 | DFLLGAYQTEFPEGPTQLMK        | 805.7254  | 3 | 34 | y++15 | 21.9 | 55.9  |
| 971 | IPI00321617.1 | 63045 | DFLLGAYQTEFPEGPTQLMK        | 1208.0812 | 2 | 50 | c b7  | 5.6  | 55.6  |
| 972 | IPI00321617.1 | 63045 | DIVLRPEMSK                  | 594.3274  | 2 | 26 | c b7  | 23.8 | 49.8  |
| 973 | IPI00321617.1 | 63045 | DMGMVTILVHNTASALR           | 915.4749  | 2 | 57 | y8    | 55.3 | 112.3 |
| 974 | IPI00321617.1 | 63045 | EMVTFLDK                    | 491.7498  | 2 | 45 | y4    | 29.5 | 74.5  |
| 975 | IPI00321617.1 | 63045 | ILVPALMVTAEK                | 642.8833  | 2 | 42 | P y9  | 66.6 | 108.6 |
| 976 | IPI00321617.1 | 63045 | ILVPALMVTAEK                | 642.8833  | 2 | 47 | P y9  | 98.0 | 145.0 |
| 977 | IPI00321617.1 | 63045 | ITFSQWVPLMDESYRK            | 1001.0011 | 2 | 18 |       | 0.0  | 18.0  |
| 978 | IPI00321617.1 | 63045 | ITFSQWVPLMDESYRK            | 667.6708  | 3 | 22 |       | 0.0  | 22.0  |
| 979 | IPI00321617.1 | 63045 | ITFSQWVPLMDESYRK            | 667.3362  | 3 | 27 |       | 0.0  | 27.0  |
| 980 | IPI00321617.1 | 63045 | ITFSQWVPLMDESYRK            | 667.6708  | 3 | 28 | y++13 | 61.2 | 89.2  |
| 981 | IPI00321617.1 | 63045 | ITFSQWVPLMDESYRK            | 1001.0012 | 2 | 35 | y5    | 49.1 | 84.1  |



|      |               |       |                         |           |   |    |      |       |       |
|------|---------------|-------|-------------------------|-----------|---|----|------|-------|-------|
| 982  | IPI00321617.1 | 63045 | ITFSQWVPLMDESYRK        | 1001.0055 | 2 | 36 |      | 0.0   | 36.0  |
| 983  | IPI00321617.1 | 63045 | SEEALALPR               | 493.2696  | 2 | 36 | c b6 | 14.6  | 50.6  |
| 984  | IPI00321617.1 | 63045 | TGFRGPLNWYR             | 456.2388  | 3 | 22 | y++9 | 21.2  | 43.2  |
| 985  | IPI00321617.1 | 63045 | VLAIMDK                 | 395.2311  | 2 | 30 | y5   | 57.1  | 87.1  |
| 986  | IPI00321617.1 | 63045 | WLQTEVQNPSVTSKI         | 865.9613  | 2 | 65 | y4   | 27.2  | 92.2  |
| 987  | IPI00321617.1 | 63045 | YQIPALAQAGFR            | 667.8650  | 2 | 38 | P y9 | 110.5 | 148.5 |
| 988  | IPI00321617.1 | 63045 | YQIPALAQAGFR            | 667.8733  | 2 | 43 | P y9 | 38.5  | 81.5  |
| 989  | IPI00228630.3 | 37288 | AGGLATTGDK              | 445.7323  | 2 | 45 | y6   | 53.0  | 98.0  |
| 990  | IPI00228630.3 | 37288 | AGGLATTGDKDILDIVPTEIHQK | 798.4294  | 3 | 16 | P y7 | 46.8  | 62.8  |
| 991  | IPI00228630.3 | 37288 | AGGLATTGDKDILDIVPTEIHQK | 598.8236  | 4 | 18 |      | 0.0   | 18.0  |
| 992  | IPI00228630.3 | 37288 | AISSAVR                 | 703.4103  | 1 | 23 |      | 0.0   | 23.0  |
| 993  | IPI00228630.3 | 37288 | AISSAVR                 | 352.2086  | 2 | 34 | y5   | 53.0  | 87.0  |
| 994  | IPI00228630.3 | 37288 | ANHAPFETDISTLTR         | 857.9264  | 2 | 36 | y6   | 15.6  | 51.6  |
| 995  | IPI00228630.3 | 37288 | ANHAPFETDISTLTR         | 857.9232  | 2 | 59 | y6   | 6.2   | 65.2  |
| 996  | IPI00228630.3 | 37288 | DFDPAINAYLQR            | 740.8554  | 2 | 27 | y6   | 38.2  | 65.2  |
| 997  | IPI00228630.3 | 37288 | DFDPAINAYLQR            | 494.2439  | 3 | 43 | c b6 | 38.2  | 81.2  |
| 998  | IPI00228630.3 | 37288 | DFDPAINAYLQRK           | 804.9043  | 2 | 54 | y7   | 22.4  | 76.4  |
| 999  | IPI00228630.3 | 37288 | DILDIVPTEIHQK           | 507.6156  | 3 | 29 | P y7 | 33.8  | 62.8  |
| 1000 | IPI00228630.3 | 37288 | DILDIVPTEIHQK           | 760.9195  | 2 | 41 | P y7 | 77.6  | 118.6 |
| 1001 | IPI00228630.3 | 37288 | FVMEQGR                 | 433.7132  | 2 | 37 | y5   | 49.6  | 86.6  |
| 1002 | IPI00228630.3 | 37288 | GNIYSLNEGAYK            | 664.8299  | 2 | 50 | y6   | 69.8  | 119.8 |
| 1003 | IPI00228630.3 | 37288 | KFPPDGSAPYGAR           | 454.8985  | 3 | 23 | P y5 | 35.8  | 58.8  |
| 1004 | IPI00228630.3 | 37288 | KGNIYSLNEGAYK           | 728.8801  | 2 | 58 | y8   | 32.0  | 90.0  |
| 1005 | IPI00228630.3 | 37288 | KLDILSNLVLINMLK         | 577.0026  | 3 | 19 | y6   | 89.0  | 108.0 |
| 1006 | IPI00228630.3 | 37288 | KLDILSNLVLINMLK         | 864.9999  | 2 | 67 | y7   | 25.4  | 92.4  |
| 1007 | IPI00228630.3 | 37288 | KLDILSNLVLINMLK         | 864.9996  | 2 | 77 | c b5 | 38.2  | 115.2 |
| 1008 | IPI00228630.3 | 37288 | KLDILSNLVLINMLK         | 864.9998  | 2 | 91 | y5   | 27.2  | 118.2 |
| 1009 | IPI00228630.3 | 37288 | QAGIAQLYGIAGSTNVTGDQVK  | 1096.5700 | 2 | 66 | y6   | 6.2   | 72.2  |
| 1010 | IPI00228630.3 | 37288 | QAGIAQLYGIAGSTNVTGDQVK  | 1096.5702 | 2 | 95 | y6   | 25.4  | 120.4 |
| 1011 | IPI00228630.3 | 37288 | TLVYGGIFLYPANK          | 778.4283  | 2 | 28 | P y4 | 41.0  | 69.0  |
| 1012 | IPI00228630.3 | 37288 | TLVYGGIFLYPANK          | 778.4285  | 2 | 28 | P y4 | 44.5  | 72.5  |
| 1013 | IPI00228630.3 | 37288 | TLVYGGIFLYPANK          | 778.4309  | 2 | 34 | P y4 | 41.0  | 75.0  |
| 1014 | IPI00228630.3 | 37288 | TLVYGGIFLYPANKK         | 561.9876  | 3 | 20 |      | 0.0   | 20.0  |
| 1015 | IPI00228630.3 | 37288 | YVGSMDIHR               | 416.5448  | 3 | 22 |      | 0.0   | 22.0  |
| 1016 | IPI00228630.3 | 37288 | YVGSMDIHR               | 624.3150  | 2 | 46 | y9   | 38.5  | 84.5  |
| 1017 | IPI00228630.3 | 37288 | YVGSMDIHR               | 624.3150  | 2 | 58 | y9   | 10.5  | 68.5  |
| 1018 | IPI00229080.4 | 83571 | ADHGPIGR                | 476.2364  | 2 | 35 | P y4 | 27.2  | 62.2  |
| 1019 | IPI00229080.4 | 83571 | ADLNNLGTIAK             | 621.8572  | 2 | 54 | y9   | 19.2  | 73.2  |
| 1020 | IPI00229080.4 | 83571 | ALLFIPR                 | 415.2683  | 2 | 23 | y4   | 41.0  | 64.0  |
| 1021 | IPI00229080.4 | 83571 | DNSTMGYMMAK             | 624.7589  | 2 | 53 | y6   | 27.2  | 80.2  |
| 1022 | IPI00229080.4 | 83571 | EGLELPEDEEEK            | 708.8287  | 2 | 17 | P y7 | 95.7  | 112.7 |

|      |               |       |                        |           |   |    |        |      |       |
|------|---------------|-------|------------------------|-----------|---|----|--------|------|-------|
| 1023 | IPI00229080.4 | 83571 | ELISNASDALDK           | 638.3239  | 2 | 51 | y8     | 32.0 | 83.0  |
| 1024 | IPI00229080.4 | 83571 | EQVANSAFVER            | 625.3132  | 2 | 57 | y6     | 14.6 | 71.6  |
| 1025 | IPI00229080.4 | 83571 | GVVDESEDLPLNISR        | 757.3965  | 2 | 25 | P y6   | 35.8 | 60.8  |
| 1026 | IPI00229080.4 | 83571 | GVVDESEDLPLNISR        | 757.8977  | 2 | 55 | P y6   | 49.6 | 104.6 |
| 1027 | IPI00229080.4 | 83571 | HLEINPDHPIVETLR        | 594.9878  | 3 | 28 | P y7   | 61.4 | 89.4  |
| 1028 | IPI00229080.4 | 83571 | HLEINPDHPIVETLR        | 892.4777  | 2 | 42 | P y7   | 82.7 | 124.7 |
| 1029 | IPI00229080.4 | 83571 | HSQFIGYPITLYLEK        | 603.6653  | 3 | 17 | c b7 P | 13.7 | 30.7  |
| 1030 | IPI00229080.4 | 83571 | HSQFIGYPITLYLEK        | 603.9887  | 3 | 22 | P y8   | 58.1 | 80.1  |
| 1031 | IPI00229080.4 | 83571 | HSQFIGYPITLYLEK        | 905.4850  | 2 | 42 | P y8   | 32.0 | 74.0  |
| 1032 | IPI00229080.4 | 83571 | HSQFIGYPITLYLEK        | 904.9797  | 2 | 44 | c b7 P | 6.2  | 50.2  |
| 1033 | IPI00229080.4 | 83571 | HSQFIGYPITLYLEK        | 905.4852  | 2 | 48 | P y8   | 58.1 | 106.1 |
| 1034 | IPI00229080.4 | 83571 | IDIIPNPQER             | 597.8320  | 2 | 43 | P y6   | 25.4 | 68.4  |
| 1035 | IPI00229080.4 | 83571 | IRYESLTDPSK            | 654.8429  | 2 | 21 | c b8 P | 32.0 | 53.0  |
| 1036 | IPI00229080.4 | 83571 | IRYESLTDPSK            | 436.8979  | 3 | 29 | y5     | 14.6 | 43.6  |
| 1037 | IPI00229080.4 | 83571 | IRYESLTDPSKLDSGK       | 603.6521  | 3 | 18 | c b8 P | 32.0 | 50.0  |
| 1038 | IPI00229080.4 | 83571 | LGIHEDSTNR             | 381.1914  | 3 | 28 | y5     | 9.6  | 37.6  |
| 1039 | IPI00229080.4 | 83571 | LGIHEDSTNR             | 571.2835  | 2 | 38 | y6     | 22.4 | 60.4  |
| 1040 | IPI00229080.4 | 83571 | SIYYITGESK             | 580.7953  | 2 | 32 | y8     | 81.7 | 113.7 |
| 1041 | IPI00229080.4 | 83571 | SLVSVTK                | 733.4473  | 1 | 27 |        | 0.0  | 27.0  |
| 1042 | IPI00229080.4 | 83571 | SLVSVTK                | 367.2262  | 2 | 28 | y5     | 57.1 | 85.1  |
| 1043 | IPI00229080.4 | 83571 | TKPIWTRNPDDITQEEYGEFYK | 683.5813  | 4 | 21 | y6     | 38.2 | 59.2  |
| 1044 | IPI00229080.4 | 83571 | TKPIWTRNPDDITQEEYGEFYK | 911.1081  | 3 | 41 |        | 0.0  | 41.0  |
| 1045 | IPI00229080.4 | 83571 | VILHLK                 | 361.7500  | 2 | 32 | y4     | 44.5 | 76.5  |
| 1046 | IPI00229080.4 | 83571 | VVVITK                 | 329.7285  | 2 | 26 | y5     | 44.5 | 70.5  |
| 1047 | IPI00229080.4 | 83571 | VVVITK                 | 658.4499  | 1 | 32 | b5     | 44.5 | 76.5  |
| 1048 | IPI00338039.1 | 50274 | AILVDLEPGTMDSVR        | 808.4212  | 2 | 62 | P y8   | 42.2 | 104.2 |
| 1049 | IPI00128370.3 | 24925 | DINAYNGETPTEKLPFPIIDDK | 831.0853  | 3 | 24 | P y8   | 58.1 | 82.1  |
| 1050 | IPI00128370.3 | 24925 | FHDFLGDSWGILFSHPR      | 677.6676  | 3 | 25 | y5     | 15.6 | 40.6  |
| 1051 | IPI00128370.3 | 24925 | FHDFLGDSWGILFSHPR      | 508.5023  | 4 | 31 | b5     | 15.6 | 46.6  |
| 1052 | IPI00128370.3 | 24925 | GRDLAILLGMLDPVEK       | 580.6625  | 3 | 21 | P y4   | 69.9 | 90.9  |
| 1053 | IPI00128370.3 | 24925 | GRDLAILLGMLDPVEK       | 870.4882  | 2 | 66 |        | 0.0  | 66.0  |
| 1054 | IPI00128370.3 | 24925 | GRDLAILLGMLDPVEK       | 870.4879  | 2 | 73 | P y4   | 69.9 | 142.9 |
| 1055 | IPI00128370.3 | 24925 | IRFHDFLGDSWGILFSHPR    | 575.7990  | 4 | 46 | y5     | 25.4 | 71.4  |
| 1056 | IPI00128370.3 | 24925 | KGESVMVPTLSEEEAK       | 611.6489  | 3 | 16 | c b8 P | 32.0 | 48.0  |
| 1057 | IPI00128370.3 | 24925 | LAPEFAK                | 775.4424  | 1 | 26 | P y5   | 69.8 | 95.8  |
| 1058 | IPI00128370.3 | 24925 | LIALSIDSVEDHLAWSK      | 949.0082  | 2 | 33 |        | 0.0  | 33.0  |
| 1059 | IPI00128370.3 | 24925 | LPFPIIDDK              | 529.3040  | 2 | 36 | P y6   | 82.7 | 118.7 |
| 1060 | IPI00128370.3 | 24925 | LSILYPATTGR            | 596.3415  | 2 | 33 | y7     | 33.8 | 66.8  |
| 1061 | IPI00128370.3 | 24925 | NFDEILR                | 453.7379  | 2 | 21 | y5     | 97.9 | 118.9 |
| 1062 | IPI00128370.3 | 24925 | PGGLLLGDEAPNFEANTTIGR  | 1072.0474 | 2 | 55 | c b8   | 38.2 | 93.2  |
| 1063 | IPI00128370.3 | 24925 | PGGLLLGDEAPNFEANTTIGR  | 1072.0475 | 2 | 70 | b8     | 49.6 | 119.6 |

|      |               |       |                       |           |   |    |        |       |       |
|------|---------------|-------|-----------------------|-----------|---|----|--------|-------|-------|
| 1064 | IPI00128370.3 | 24925 | PGGLLLGDAPNFEANTTIGR  | 1072.0472 | 2 | 74 | c b8   | 38.2  | 112.2 |
| 1065 | IPI00128370.3 | 24925 | PGGLLLGDAPNFEANTTIGR  | 1072.0470 | 2 | 74 | y7     | 5.9   | 79.9  |
| 1066 | IPI00128370.3 | 24925 | VVDSLQLTGTKPVATPVDWK  | 1078.0965 | 2 | 78 | P y5   | 32.3  | 110.3 |
| 1067 | IPI00128370.3 | 24925 | VVDSLQLTGTKPVATPVDWKK | 761.7650  | 3 | 23 | P y6   | 41.0  | 64.0  |
| 1068 | IPI00128370.3 | 24925 | VVDSLQLTGTKPVATPVDWKK | 571.3247  | 4 | 23 | P y6   | 29.5  | 52.5  |
| 1069 | IPI00128370.3 | 24925 | VVFIFGPKD             | 1021.5743 | 1 | 38 | y4     | 57.1  | 95.1  |
| 1070 | IPI00128370.3 | 24925 | VVFIFGPKD             | 511.2899  | 2 | 49 | y4     | 49.1  | 98.1  |
| 1071 | IPI00128370.3 | 24925 | VVFIFGPKD             | 383.8936  | 3 | 34 | y6     | 20.6  | 54.6  |
| 1072 | IPI00351280.2 | 42459 | AGGFLMK               | 362.1969  | 2 | 39 | y6     | 75.6  | 114.6 |
| 1073 | IPI00351280.2 | 42459 | AGGFLMK               | 426.2447  | 2 | 34 | y4     | 44.5  | 78.5  |
| 1074 | IPI00351280.2 | 42459 | AHSSMVGVNLPQK         | 456.5748  | 3 | 32 | y5     | 14.6  | 46.6  |
| 1075 | IPI00351280.2 | 42459 | AHSSMVGVNLPQK         | 684.3602  | 2 | 38 |        | 0.0   | 38.0  |
| 1076 | IPI00351280.2 | 42459 | ALESPERPFLAILGGAK     | 590.3363  | 3 | 25 |        | 0.0   | 25.0  |
| 1077 | IPI00351280.2 | 42459 | ALESPERPFLAILGGAK     | 590.3362  | 3 | 36 | y7     | 32.0  | 68.0  |
| 1078 | IPI00351280.2 | 42459 | DVLFLK                | 367.7260  | 2 | 18 |        | 0.0   | 18.0  |
| 1079 | IPI00351280.2 | 42459 | FHVEEEGK              | 325.4906  | 3 | 21 | c b4   | 32.3  | 53.3  |
| 1080 | IPI00351280.2 | 42459 | FHVEEEGK              | 487.7325  | 2 | 25 | y6     | 53.0  | 78.0  |
| 1081 | IPI00351280.2 | 42459 | IQLINMLDK             | 601.3362  | 2 | 50 | y7     | 95.7  | 145.7 |
| 1082 | IPI00351280.2 | 42459 | ITLPVDFVTADK          | 659.8684  | 2 | 47 | P y9   | 135.2 | 182.2 |
| 1083 | IPI00351280.2 | 42459 | ITLPVDFVTADKFDENAK    | 1012.5260 | 2 | 53 |        | 0.0   | 53.0  |
| 1084 | IPI00351280.2 | 42459 | KYAEAVGR              | 447.2455  | 2 | 34 | y6     | 46.8  | 80.8  |
| 1085 | IPI00351280.2 | 42459 | LGDVYVNDAFGTAHR       | 545.9370  | 3 | 53 | y+++9  | 53.0  | 106.0 |
| 1086 | IPI00351280.2 | 42459 | QIVWNGPVGVEWEAFAR     | 1053.5377 | 2 | 51 | y7     | 32.3  | 83.3  |
| 1087 | IPI00351280.2 | 42459 | QIVWNGPVGVEWEAFAR     | 1053.5379 | 2 | 64 | y6     | 22.4  | 86.4  |
| 1088 | IPI00351280.2 | 42459 | QIVWNGPVGVEWEAFAR     | 1053.5382 | 2 | 80 | y5     | 8.5   | 88.5  |
| 1089 | IPI00351280.2 | 42459 | SLMDEVVK              | 920.4771  | 1 | 26 |        | 0.0   | 26.0  |
| 1090 | IPI00351280.2 | 42459 | SLMDEVVK              | 460.7418  | 2 | 40 | y6     | 82.7  | 122.7 |
| 1091 | IPI00351280.2 | 42459 | SVVLMShLGRPDGVMPDK    | 679.0252  | 3 | 25 | b6     | 1.6   | 26.6  |
| 1092 | IPI00351280.2 | 42459 | VDFNVPMK              | 475.2443  | 2 | 25 | c b5 P | 27.2  | 52.2  |
| 1093 | IPI00351280.2 | 42459 | VLNNMEIGTSLYDEEGAK    | 992.4723  | 2 | 48 |        | 0.0   | 48.0  |
| 1094 | IPI00351280.2 | 42459 | VLNNMEIGTSLYDEEGAK    | 991.9718  | 2 | 62 | y7     | 61.4  | 123.4 |
| 1095 | IPI00351280.2 | 42459 | VLPVDALSNNV           | 1083.6041 | 1 | 27 | P y9   | 52.8  | 79.8  |
| 1096 | IPI00351280.2 | 42459 | VLPVDALSNNV           | 542.3065  | 2 | 45 | y6     | 53.0  | 98.0  |
| 1097 | IPI00351280.2 | 42459 | YSLEPVAAELK           | 610.3326  | 2 | 29 | P y7   | 61.4  | 90.4  |
| 1098 | IPI00351280.2 | 42459 | YSLEPVAAELK           | 610.3326  | 2 | 45 | P y7   | 46.8  | 91.8  |
| 1099 | IPI00127206.4 | 39938 | AHRFPALTPEQKK         | 391.9706  | 4 | 41 |        | 0.0   | 41.0  |
| 1100 | IPI00127206.4 | 39938 | AHRFPALTPEQKK         | 522.2915  | 3 | 43 | P y5   | 53.0  | 96.0  |
| 1101 | IPI00127206.4 | 39938 | ALQASALAAWGGK         | 622.3449  | 2 | 88 | y6     | 89.0  | 177.0 |
| 1102 | IPI00127206.4 | 39938 | ATQEAFMK              | 463.2260  | 2 | 33 | y5     | 62.3  | 95.3  |
| 1103 | IPI00127206.4 | 39938 | DGVDFGK               | 737.3521  | 1 | 31 | y6     | 75.6  | 106.6 |
| 1104 | IPI00127206.4 | 39938 | DGVDFGK               | 369.1768  | 2 | 49 | y5     | 41.0  | 90.0  |

|      |               |       |                             |           |   |    |      |       |       |
|------|---------------|-------|-----------------------------|-----------|---|----|------|-------|-------|
| 1105 | IPI00127206.4 | 39938 | DSQGNLFR                    | 468.7308  | 2 | 41 |      | 0.0   | 41.0  |
| 1106 | IPI00127206.4 | 39938 | ELLFSVDNSISQSIGGVILFHETLYQK | 1013.5343 | 3 | 20 |      | 0.0   | 20.0  |
| 1107 | IPI00127206.4 | 39938 | ELLFSVDNSISQSIGGVILFHETLYQK | 1013.5396 | 3 | 21 |      | 0.0   | 21.0  |
| 1108 | IPI00127206.4 | 39938 | ELLFSVDNSISQSIGGVILFHETLYQK | 1013.5389 | 3 | 27 |      | 0.0   | 27.0  |
| 1109 | IPI00127206.4 | 39938 | ELLFSVDNSISQSIGGVILFHETLYQK | 1013.5344 | 3 | 28 |      | 0.0   | 28.0  |
| 1110 | IPI00127206.4 | 39938 | ELSEIAQR                    | 473.2535  | 2 | 37 |      | 0.0   | 37.0  |
| 1111 | IPI00127206.4 | 39938 | ETTIQGLDGLSER               | 709.8688  | 2 | 62 | y8   | 22.4  | 84.4  |
| 1112 | IPI00127206.4 | 39938 | GIVVGIK                     | 685.4605  | 1 | 22 |      | 0.0   | 22.0  |
| 1113 | IPI00127206.4 | 39938 | GIVVGIK                     | 343.2338  | 2 | 40 | y4   | 57.1  | 97.1  |
| 1114 | IPI00127206.4 | 39938 | IKVENTEENRR                 | 694.3678  | 2 | 31 |      | 0.0   | 31.0  |
| 1115 | IPI00127206.4 | 39938 | KYTPEQVAMATVTALHR           | 639.6764  | 3 | 36 | y5   | 15.6  | 51.6  |
| 1116 | IPI00127206.4 | 39938 | KYTPEQVAMATVTALHR           | 639.3415  | 3 | 58 | y5   | 15.6  | 73.6  |
| 1117 | IPI00127206.4 | 39938 | KYTPEQVAMATVTALHR           | 639.3416  | 3 | 62 | y5   | 27.2  | 89.2  |
| 1118 | IPI00127206.4 | 39938 | LDQGGAPLAGTNK               | 621.3283  | 2 | 55 | P y7 | 61.4  | 116.4 |
| 1119 | IPI00127206.4 | 39938 | LDQGGAPLAGTNK               | 621.3284  | 2 | 61 | P y7 | 35.8  | 96.8  |
| 1120 | IPI00127206.4 | 39938 | LSFSYGR                     | 415.2139  | 2 | 23 | y5   | 25.4  | 48.4  |
| 1121 | IPI00127206.4 | 39938 | VLAAYYK                     | 763.4737  | 1 | 35 |      | 0.0   | 35.0  |
| 1122 | IPI00127206.4 | 39938 | VLAAYYK                     | 382.2392  | 2 | 45 | y6   | 57.1  | 102.1 |
| 1123 | IPI00230002.3 | 44907 | AAVPSIK                     | 343.2159  | 2 | 25 | P y4 | 44.5  | 69.5  |
| 1124 | IPI00230002.3 | 44907 | LGDVYVNDAFGTAHR             | 545.6031  | 3 | 41 | y6   | 1.4   | 42.4  |
| 1125 | IPI00230002.3 | 44907 | VSHVSTGGGASLELLEGG          | 580.9769  | 3 | 24 |      | 0.0   | 24.0  |
| 1126 | IPI00135231.1 | 47030 | DAAEAIIK                    | 423.2404  | 2 | 45 | y5   | 57.1  | 102.1 |
| 1127 | IPI00135231.1 | 47030 | DIFQEYDK                    | 585.7935  | 2 | 29 | y7   | 125.8 | 154.8 |
| 1128 | IPI00135231.1 | 47030 | DIFQEYDK                    | 585.7890  | 2 | 29 | y7   | 82.7  | 111.7 |
| 1129 | IPI00135231.1 | 47030 | GLPNVQR                     | 783.4519  | 1 | 18 |      | 0.0   | 18.0  |
| 1130 | IPI00135231.1 | 47030 | GLPNVQR                     | 392.2270  | 2 | 21 | P y5 | 53.0  | 74.0  |
| 1131 | IPI00135231.1 | 47030 | GQETSTNPIASIFAWSR           | 932.9641  | 2 | 63 | y5   | 15.6  | 78.6  |
| 1132 | IPI00135231.1 | 47030 | GQETSTNPIASIFAWSR           | 933.4651  | 2 | 78 | y7   | 1.6   | 79.6  |
| 1133 | IPI00135231.1 | 47030 | GQETSTNPIASIFAWSR           | 932.9644  | 2 | 97 | y7   | 33.8  | 130.8 |
| 1134 | IPI00135231.1 | 47030 | GWPLYLSTK                   | 532.7928  | 2 | 39 | P y7 | 102.5 | 141.5 |
| 1135 | IPI00135231.1 | 47030 | IIWELIK                     | 457.7890  | 2 | 36 | y5   | 69.8  | 105.8 |
| 1136 | IPI00135231.1 | 47030 | LDNNTLSFFAK                 | 699.8492  | 2 | 66 | y5   | 53.0  | 119.0 |
| 1137 | IPI00135231.1 | 47030 | LGENLK                      | 337.1974  | 2 | 35 | y4   | 62.3  | 97.3  |
| 1138 | IPI00135231.1 | 47030 | LVTGWVKPIIIGR               | 484.6419  | 3 | 30 | P y6 | 23.8  | 53.8  |
| 1139 | IPI00135231.1 | 47030 | LVTGWVKPIIIGR               | 726.4588  | 2 | 67 | P y6 | 49.6  | 116.6 |
| 1140 | IPI00135231.1 | 47030 | NILGGTVFR                   | 488.7825  | 2 | 40 | y7   | 23.8  | 63.8  |
| 1141 | IPI00135231.1 | 47030 | SIEDFAHSSFQMALSK            | 899.4305  | 2 | 41 | y9   | 38.5  | 79.5  |
| 1142 | IPI00135231.1 | 47030 | SIEDFAHSSFQMALSK            | 899.4304  | 2 | 50 | y9   | 10.5  | 60.5  |
| 1143 | IPI00135231.1 | 47030 | TVEAEAAHGTVTR               | 447.8970  | 3 | 21 |      | 0.0   | 21.0  |
| 1144 | IPI00135231.1 | 47030 | TVEAEAAHGTVTR               | 671.3421  | 2 | 66 | y5   | 18.5  | 84.5  |
| 1145 | IPI00135231.1 | 47030 | VEITYTPK                    | 475.7633  | 2 | 43 | y6   | 53.0  | 96.0  |

|      |               |        |                             |           |   |    |        |      |       |
|------|---------------|--------|-----------------------------|-----------|---|----|--------|------|-------|
| 1146 | IPI00135231.1 | 47030  | VTYMVHDFEEGGGVAMGMYNQDK     | 860.3736  | 3 | 15 |        | 0.0  | 15.0  |
| 1147 | IPI00135231.1 | 47030  | VTYMVHDFEEGGGVAMGMYNQDK     | 860.3737  | 3 | 19 | y5     | 62.3 | 81.3  |
| 1148 | IPI00113325.1 | 149333 | ASKPGLLASVAVAQAQK           | 527.9848  | 3 | 20 | y7     | 61.4 | 81.4  |
| 1149 | IPI00113325.1 | 149333 | AVDEFNQQR                   | 553.7652  | 2 | 56 | y4     | 29.5 | 85.5  |
| 1150 | IPI00113325.1 | 149333 | EFQPLDPTQELIFPELMR          | 1151.0863 | 2 | 26 |        | 0.0  | 26.0  |
| 1151 | IPI00113325.1 | 149333 | EFQPLDPTQELIFPELMR          | 1151.0917 | 2 | 27 | P y6   | 89.0 | 116.0 |
| 1152 | IPI00113325.1 | 149333 | EFQPLDPTQELIFPELMR          | 1151.0858 | 2 | 29 | P y6   | 69.8 | 98.8  |
| 1153 | IPI00113325.1 | 149333 | FSVGFPK                     | 391.2162  | 2 | 27 | y4     | 27.2 | 54.2  |
| 1154 | IPI00113325.1 | 149333 | GLSPIWAINSPATAEVIR          | 948.5233  | 2 | 56 | c b7   | 57.1 | 113.1 |
| 1155 | IPI00113325.1 | 149333 | GLSPIWAINSPATAEVIR          | 948.5235  | 2 | 67 | P y8   | 69.8 | 136.8 |
| 1156 | IPI00113325.1 | 149333 | GYQADMDWEK                  | 621.7607  | 2 | 35 | y7     | 61.4 | 96.4  |
| 1157 | IPI00113325.1 | 149333 | HPSAPLVIGNTYLGLHMK          | 650.3533  | 3 | 19 |        | 0.0  | 19.0  |
| 1158 | IPI00113325.1 | 149333 | IASVTDIPEEFHVSLLTPTPNPK     | 836.1121  | 3 | 18 | P y6   | 8.5  | 26.5  |
| 1159 | IPI00113325.1 | 149333 | IASVTDIPEEFHVSLLTPTPNPK     | 836.1124  | 3 | 27 | P y6   | 25.4 | 52.4  |
| 1160 | IPI00113325.1 | 149333 | IGFMNNGK                    | 440.7206  | 2 | 49 | y6     | 69.8 | 118.8 |
| 1161 | IPI00113325.1 | 149333 | IVYQDIEPMIVTVQDALQYESFIGPER | 1052.5315 | 3 | 21 | y5     | 16.9 | 37.9  |
| 1162 | IPI00113325.1 | 149333 | IVYQDIEPMIVTVQDALQYESFIGPER | 1052.2014 | 3 | 42 | y6     | 5.9  | 47.9  |
| 1163 | IPI00113325.1 | 149333 | MAEESQNTVLTRFRGER           | 623.3081  | 3 | 23 |        | 0.0  | 23.0  |
| 1164 | IPI00113325.1 | 149333 | MIQVASR                     | 402.7238  | 2 | 39 | y4     | 7.1  | 46.1  |
| 1165 | IPI00113325.1 | 149333 | NADPEVNLFFYLRLK             | 846.4613  | 2 | 38 | y4     | 16.9 | 54.9  |
| 1166 | IPI00113325.1 | 149333 | NVASLGGHIISR                | 612.3460  | 2 | 61 | y7     | 77.6 | 138.6 |
| 1167 | IPI00113325.1 | 149333 | NVLSDVVSR                   | 494.7749  | 2 | 34 | y7     | 46.8 | 80.8  |
| 1168 | IPI00113325.1 | 149333 | PWSIPVA                     | 769.4250  | 1 | 41 | c b4 P | 29.5 | 70.5  |
| 1169 | IPI00113325.1 | 149333 | QQNAFATVNAGMK               | 690.3452  | 2 | 44 | y8     | 30.4 | 74.4  |
| 1170 | IPI00113325.1 | 149333 | RDDMLITGGRHPLLK             | 445.4976  | 4 | 25 | b5     | 25.4 | 50.4  |
| 1171 | IPI00113325.1 | 149333 | RDDMLITGGRHPLLK             | 593.6610  | 3 | 29 | c b6   | 1.1  | 30.1  |
| 1172 | IPI00113325.1 | 149333 | RLEPIIK                     | 434.7846  | 2 | 24 | c b5   | 38.2 | 62.2  |
| 1173 | IPI00113325.1 | 149333 | RVGGAFGGK                   | 424.7404  | 2 | 25 | c b8   | 29.0 | 54.0  |
| 1174 | IPI00113325.1 | 149333 | TGRPIR                      | 350.2169  | 2 | 17 | c b5   | 29.5 | 46.5  |
| 1175 | IPI00113325.1 | 149333 | TLAQQQIR                    | 443.7593  | 2 | 25 | y5     | 41.0 | 66.0  |
| 1176 | IPI00113325.1 | 149333 | TNLPSNTAFR                  | 560.7909  | 2 | 40 | P y7   | 22.4 | 62.4  |
| 1177 | IPI00113325.1 | 149333 | TRIHVQER                    | 568.3207  | 2 | 27 | P y5   | 27.2 | 54.2  |
| 1178 | IPI00113325.1 | 149333 | TTWIAPGTLNDLLELK            | 892.9935  | 2 | 34 | c b5 P | 8.5  | 42.5  |
| 1179 | IPI00113325.1 | 149333 | TTWIAPGTLNDLLELK            | 893.4924  | 2 | 43 | y++14  | 23.6 | 66.6  |
| 1180 | IPI00113325.1 | 149333 | TTWIAPGTLNDLLELK            | 892.9935  | 2 | 51 |        | 0.0  | 51.0  |
| 1181 | IPI00113325.1 | 149333 | VRELNMYR                    | 360.8588  | 3 | 22 | c b5   | 41.0 | 63.0  |
| 1182 | IPI00113325.1 | 149333 | VRELNMYR                    | 540.7844  | 2 | 34 | y6     | 25.4 | 59.4  |
| 1183 | IPI00113325.1 | 149333 | WEFVSAFR                    | 521.2609  | 2 | 39 | y6     | 14.6 | 53.6  |
| 1184 | IPI00113325.1 | 149333 | YSPEGVLYTR                  | 592.8014  | 2 | 51 | P y8   | 20.1 | 71.1  |
| 1185 | IPI00117348.1 | 50818  | AVFVDLEPTVIDEVR             | 851.4570  | 2 | 46 | y5     | 41.0 | 87.0  |
| 1186 | IPI00117348.1 | 50818  | AVFVDLEPTVIDEVR             | 851.4570  | 2 | 69 | P y8   | 55.3 | 124.3 |

|      |               |       |                               |           |   |    |        |      |       |
|------|---------------|-------|-------------------------------|-----------|---|----|--------|------|-------|
| 1187 | IPI00117348.1 | 50818 | DVNAAIATIK                    | 508.2926  | 2 | 57 | y8     | 55.3 | 112.3 |
| 1188 | IPI00117348.1 | 50818 | EIIDLVLDLDR                   | 543.3137  | 2 | 67 |        | 0.0  | 67.0  |
| 1189 | IPI00117348.1 | 50818 | FDLMYAK                       | 444.2204  | 2 | 41 | y5     | 89.0 | 130.0 |
| 1190 | IPI00117348.1 | 50818 | IHFPLATYAPVISA EK             | 878.9880  | 2 | 32 | y8     | 61.4 | 93.4  |
| 1191 | IPI00117348.1 | 50818 | LDHKFDL MYAK                  | 460.9042  | 3 | 28 |        | 0.0  | 28.0  |
| 1192 | IPI00117348.1 | 50818 | LDHKFDL MYAK                  | 690.8563  | 2 | 36 | y++9   | 53.0 | 89.0  |
| 1193 | IPI00117348.1 | 50818 | LISQIVSSITASLR                | 744.4433  | 2 | 55 | y9     | 19.2 | 74.2  |
| 1194 | IPI00117348.1 | 50818 | LISQIVSSITASLR                | 744.4433  | 2 | 65 | y8     | 11.6 | 76.6  |
| 1195 | IPI00117348.1 | 50818 | LSVDY GKK                     | 455.2560  | 2 | 22 |        | 0.0  | 22.0  |
| 1196 | IPI00117348.1 | 50818 | NLDIERPTYTNLNR                | 859.9437  | 2 | 29 | P y8   | 32.0 | 61.0  |
| 1197 | IPI00117348.1 | 50818 | QLFHPEQLITGKEDAANNYAR         | 806.0753  | 3 | 53 | y7     | 25.4 | 78.4  |
| 1198 | IPI00117348.1 | 50818 | TIGGGDDSFNTFFSETGAGK          | 1004.9546 | 2 | 55 | y7     | 30.4 | 85.4  |
| 1199 | IPI00117348.1 | 50818 | TIGGGDDSFNTFFSETGAGK          | 1004.9508 | 2 | 73 | y7     | 32.0 | 105.0 |
| 1200 | IPI00117348.1 | 50818 | VGINYQPPTVVPGGDLAK            | 913.4984  | 2 | 49 | P y7   | 22.4 | 71.4  |
| 1201 | IPI00117348.1 | 50818 | VGINYQPPTVVPGGDLAK            | 912.9975  | 2 | 52 | P y7   | 35.8 | 87.8  |
| 1202 | IPI00355888.2 | 36809 | DATNVGDEGGFAPNILENK           | 654.6476  | 3 | 38 | P y7   | 61.4 | 99.4  |
| 1203 | IPI00355888.2 | 36809 | DATNVGDEGGFAPNILENK           | 981.4667  | 2 | 57 | P y7   | 22.4 | 79.4  |
| 1204 | IPI00355888.2 | 36809 | DATNVGDEGGFAPNILENK           | 980.9690  | 2 | 58 | c b5   | 8.5  | 66.5  |
| 1205 | IPI00355888.2 | 36809 | HIADLAGNPEVILPVPFNVINGGSHAGNK | 756.8999  | 4 | 30 | b8 P   | 1.8  | 31.8  |
| 1206 | IPI00355888.2 | 36809 | IGAEVYHNLK                    | 381.8767  | 3 | 36 |        | 0.0  | 36.0  |
| 1207 | IPI00355888.2 | 36809 | IGAEVYHNLK                    | 572.3113  | 2 | 45 | y6     | 46.8 | 91.8  |
| 1208 | IPI00355888.2 | 36809 | KVNVVEQEK                     | 358.2048  | 3 | 26 | c b4   | 57.1 | 83.1  |
| 1209 | IPI00355888.2 | 36809 | KVNVVEQEK                     | 536.8040  | 2 | 37 | y7     | 95.7 | 132.7 |
| 1210 | IPI00355888.2 | 36809 | LAMQEFMILPVGASSFR             | 632.9987  | 3 | 30 | P y8   | 20.1 | 50.1  |
| 1211 | IPI00355888.2 | 36809 | LAMQEFMILPVGASSFR             | 949.4931  | 2 | 60 | P y8   | 22.4 | 82.4  |
| 1212 | IPI00355888.2 | 36809 | LAMQEFMILPVGASSFR             | 949.4929  | 2 | 62 | P y8   | 32.0 | 94.0  |
| 1213 | IPI00355888.2 | 36809 | LAQSNWGWVMVSHR                | 514.5930  | 3 | 31 |        | 0.0  | 31.0  |
| 1214 | IPI00355888.2 | 36809 | LAQSNWGWVMVSHR                | 771.3952  | 2 | 82 | y5     | 6.6  | 88.6  |
| 1215 | IPI00355888.2 | 36809 | LMIEMDGTENK                   | 640.7968  | 2 | 44 | y8     | 61.4 | 105.4 |
| 1216 | IPI00355888.2 | 36809 | LMIEMDGTENK                   | 640.7988  | 2 | 44 | y8     | 73.4 | 117.4 |
| 1217 | IPI00355888.2 | 36809 | SFRNPLAK                      | 311.5153  | 3 | 18 |        | 0.0  | 18.0  |
| 1218 | IPI00355888.2 | 36809 | SFVQNYPVVSIEDPFDQDDWGA WQK    | 991.1218  | 3 | 45 |        | 0.0  | 45.0  |
| 1219 | IPI00355888.2 | 36809 | SFVQNYPVVSIEDPFDQDDWGA WQK    | 991.1253  | 3 | 49 |        | 0.0  | 49.0  |
| 1220 | IPI00355888.2 | 36809 | SPDDPSRYITPDQLADLYK           | 732.3609  | 3 | 24 |        | 0.0  | 24.0  |
| 1221 | IPI00355888.2 | 36809 | SPDDPSRYITPDQLADLYK           | 732.3610  | 3 | 28 | b4 P   | 44.5 | 72.5  |
| 1222 | IPI00355888.2 | 36809 | VNVVEQEK                      | 472.7559  | 2 | 29 | y5     | 15.6 | 44.6  |
| 1223 | IPI00355888.2 | 36809 | YITPDQLADLYK                  | 720.3744  | 2 | 27 |        | 0.0  | 27.0  |
| 1224 | IPI00355888.2 | 36809 | YITPDQLADLYK                  | 720.8752  | 2 | 39 | P y++9 | 38.2 | 77.2  |
| 1225 | IPI00355888.2 | 36809 | YNQILR                        | 403.7297  | 2 | 20 |        | 0.0  | 20.0  |
| 1226 | IPI00381603.1 | 47437 | EIFDSR                        | 766.3739  | 1 | 24 | y5     | 14.6 | 38.6  |
| 1227 | IPI00381603.1 | 47437 | GNPTVEVDLYTAK                 | 703.8658  | 2 | 40 | y8     | 58.1 | 98.1  |

|      |               |       |                                |           |   |    |        |      |       |
|------|---------------|-------|--------------------------------|-----------|---|----|--------|------|-------|
| 1228 | IPI00381603.1 | 47437 | GVSQAVEHINK                    | 591.3173  | 2 | 55 | y7     | 49.6 | 104.6 |
| 1229 | IPI00381603.1 | 47437 | HIADLAGNPEVILPVPAFNVINGGSHAGNK | 1008.1987 | 3 | 67 | b8 P   | 21.2 | 88.2  |
| 1230 | IPI00381603.1 | 47437 | SGKYDLDFK                      | 536.7693  | 2 | 37 | c b7   | 49.6 | 86.6  |
| 1231 | IPI00221400.3 | 40601 | AAVLWELHK                      | 356.2065  | 3 | 32 |        | 0.0  | 32.0  |
| 1232 | IPI00221400.3 | 40601 | AAVLWELHK                      | 533.8061  | 2 | 41 | y5     | 15.6 | 56.6  |
| 1233 | IPI00221400.3 | 40601 | AAVLWELHKPFTIEDIEVAPPK         | 626.5974  | 4 | 21 | y5     | 38.2 | 59.2  |
| 1234 | IPI00221400.3 | 40601 | GAIFGGFK                       | 398.7216  | 2 | 37 | y6     | 75.6 | 112.6 |
| 1235 | IPI00221400.3 | 40601 | GAIFGGFK                       | 398.7216  | 2 | 39 | y6     | 69.8 | 108.8 |
| 1236 | IPI00221400.3 | 40601 | GTLREGTSR                      | 488.7622  | 2 | 23 |        | 0.0  | 23.0  |
| 1237 | IPI00221400.3 | 40601 | IDGASPLDK                      | 458.2427  | 2 | 27 | y5     | 57.1 | 84.1  |
| 1238 | IPI00221400.3 | 40601 | IIAVDINK                       | 443.2736  | 2 | 49 | y6     | 69.8 | 118.8 |
| 1239 | IPI00221400.3 | 40601 | INEAFDLLR                      | 1090.5906 | 1 | 36 |        | 0.0  | 36.0  |
| 1240 | IPI00221400.3 | 40601 | INEAFDLLR                      | 545.7983  | 2 | 57 | y7     | 61.4 | 118.4 |
| 1241 | IPI00221400.3 | 40601 | INEAFDLLR                      | 545.7983  | 2 | 58 | y5     | 38.2 | 96.2  |
| 1242 | IPI00221400.3 | 40601 | KFPLDPLITHVLPFEK               | 632.0339  | 3 | 23 | c b5 P | 14.6 | 37.6  |
| 1243 | IPI00221400.3 | 40601 | KFPLDPLITHVLPFEK               | 474.2770  | 4 | 25 | y++8   | 16.9 | 41.9  |
| 1244 | IPI00221400.3 | 40601 | KFPLDPLITHVLPFEK               | 632.0368  | 3 | 27 | c b7   | 14.6 | 41.6  |
| 1245 | IPI00221400.3 | 40601 | KFPLDPLITHVLPFEK               | 474.2770  | 4 | 27 | b5 P   | 27.2 | 54.2  |
| 1246 | IPI00221400.3 | 40601 | KFPLDPLITHVLPFEK               | 632.0368  | 3 | 28 | P y4   | 44.5 | 72.5  |
| 1247 | IPI00221400.3 | 40601 | LVADFMAK                       | 447.7415  | 2 | 38 | y6     | 69.8 | 107.8 |
| 1248 | IPI00221400.3 | 40601 | PFTIEDIEVAPPK                  | 728.3892  | 2 | 60 | y8     | 33.8 | 93.8  |
| 1249 | IPI00221400.3 | 40601 | PFTIEDIEVAPPK                  | 728.3891  | 2 | 62 | y8     | 46.8 | 108.8 |
| 1250 | IPI00221400.3 | 40601 | PFTIEDIEVAPPK                  | 728.3892  | 2 | 64 | y9     | 29.0 | 93.0  |
| 1251 | IPI00221400.3 | 40601 | PFTIEDIEVAPPK                  | 728.3891  | 2 | 80 |        | 0.0  | 80.0  |
| 1252 | IPI00221400.3 | 40601 | QIHNFI STS TFSQYTVVDDIAVAK     | 895.7906  | 3 | 16 |        | 0.0  | 16.0  |
| 1253 | IPI00221400.3 | 40601 | QIHNFI STS TFSQYTVVDDIAVAK     | 895.7906  | 3 | 20 |        | 0.0  | 20.0  |
| 1254 | IPI00221400.3 | 40601 | QIHNFI STS TFSQYTVVDDIAVAK     | 895.7909  | 3 | 21 |        | 0.0  | 21.0  |
| 1255 | IPI00221400.3 | 40601 | QIHNFI STS TFSQYTVVDDIAVAK     | 895.7906  | 3 | 27 | y7     | 46.8 | 73.8  |
| 1256 | IPI00221400.3 | 40601 | QIHNFI STS TFSQYTVVDDIAVAK     | 895.7906  | 3 | 29 | y8     | 58.1 | 87.1  |
| 1257 | IPI00221400.3 | 40601 | QIHNFI STS TFSQYTVVDDIAVAK     | 895.7905  | 3 | 30 | y8     | 61.4 | 91.4  |
| 1258 | IPI00221400.3 | 40601 | QIHNFI STS TFSQYTVVDDIAVAK     | 895.7906  | 3 | 36 | y7     | 25.4 | 61.4  |
| 1259 | IPI00221400.3 | 40601 | QIHNFI STS TFSQYTVVDDIAVAK     | 895.7905  | 3 | 39 | y7     | 97.9 | 136.9 |
| 1260 | IPI00221400.3 | 40601 | SDLLMPR                        | 416.2233  | 2 | 52 | y4     | 27.2 | 79.2  |
| 1261 | IPI00125439.3 | 36525 | GAAQNIIPASTGAAK                | 685.3775  | 2 | 20 | P y8   | 44.3 | 64.3  |
| 1262 | IPI00125439.3 | 36525 | LISWYDNEYGYSNR                 | 890.9060  | 2 | 45 | y6     | 6.2  | 51.2  |
| 1263 | IPI00125439.3 | 36525 | LISWYDNEYGYSNR                 | 890.9058  | 2 | 59 | y5     | 25.4 | 84.4  |
| 1264 | IPI00125439.3 | 36525 | LISWYDNEYGYSNR                 | 890.4021  | 2 | 61 | y5     | 13.7 | 74.7  |
| 1265 | IPI00125439.3 | 36525 | LISWYDNEYGYSNR                 | 890.4024  | 2 | 64 | y5     | 14.6 | 78.6  |
| 1266 | IPI00125439.3 | 36525 | LTGMAFR                        | 795.4243  | 1 | 20 |        | 0.0  | 20.0  |
| 1267 | IPI00125439.3 | 36525 | PAKYDDIK                       | 475.2536  | 2 | 29 | c b6   | 57.1 | 86.1  |
| 1268 | IPI00125439.3 | 36525 | PAKYDDIKK                      | 539.3002  | 2 | 52 | c b6   | 44.5 | 96.5  |

|      |               |       |                                |           |   |    |        |      |       |
|------|---------------|-------|--------------------------------|-----------|---|----|--------|------|-------|
| 1269 | IPI00125439.3 | 36525 | QASEGPLK                       | 829.4434  | 1 | 18 |        | 0.0  | 18.0  |
| 1270 | IPI00125439.3 | 36525 | RVIISAPSADAPMFVMGVNHEK         | 593.0589  | 4 | 18 | b5     | 1.4  | 19.4  |
| 1271 | IPI00125439.3 | 36525 | RVIISAPSADAPMFVMGVNHEK         | 593.0590  | 4 | 18 |        | 0.0  | 18.0  |
| 1272 | IPI00125439.3 | 36525 | RVIISAPSADAPMFVMGVNHEK         | 593.3088  | 4 | 23 | b6 P   | 38.2 | 61.2  |
| 1273 | IPI00125439.3 | 36525 | RVIISAPSADAPMFVMGVNHEK         | 790.7418  | 3 | 43 | y6     | 27.2 | 70.2  |
| 1274 | IPI00125439.3 | 36525 | TVDGPSGK                       | 380.6955  | 2 | 19 |        | 0.0  | 19.0  |
| 1275 | IPI00125439.3 | 36525 | VGVNGFGR                       | 805.4383  | 1 | 16 |        | 0.0  | 16.0  |
| 1276 | IPI00125439.3 | 36525 | VGVNGFGR                       | 403.7117  | 2 | 41 | y4     | 7.1  | 48.1  |
| 1277 | IPI00125439.3 | 36525 | VGVNGFGR                       | 403.2197  | 2 | 49 | y5     | 25.4 | 74.4  |
| 1278 | IPI00125439.3 | 36525 | VIHDNFGIVEGLMTTVHAIATQK        | 649.8463  | 4 | 29 | y5     | 18.5 | 47.5  |
| 1279 | IPI00125439.3 | 36525 | VIHDNFGIVEGLMTTVHAIATQK        | 649.8460  | 4 | 34 |        | 0.0  | 34.0  |
| 1280 | IPI00125439.3 | 36525 | VIHDNFGIVEGLMTTVHAIATQK        | 649.8463  | 4 | 41 |        | 0.0  | 41.0  |
| 1281 | IPI00125439.3 | 36525 | VIHDNFGIVEGLMTTVHAIATQK        | 866.1250  | 3 | 42 |        | 0.0  | 42.0  |
| 1282 | IPI00125439.3 | 36525 | VIHDNFGIVEGLMTTVHAIATQK        | 649.8479  | 4 | 43 | b8     | 46.8 | 89.8  |
| 1283 | IPI00125439.3 | 36525 | VIHDNFGIVEGLMTTVHAIATQK        | 649.8480  | 4 | 46 | b8     | 49.6 | 95.6  |
| 1284 | IPI00125439.3 | 36525 | VIHDNFGIVEGLMTTVHAIATQK        | 649.8463  | 4 | 59 | b8     | 58.1 | 117.1 |
| 1285 | IPI00125439.3 | 36525 | VVDLMAYMASK                    | 614.3101  | 2 | 73 | y6     | 75.6 | 148.6 |
| 1286 | IPI00125439.3 | 36525 | VVDLMAYMASKE                   | 678.8319  | 2 | 27 |        | 0.0  | 27.0  |
| 1287 | IPI00125439.3 | 36525 | VVDLMAYMASKE                   | 678.8302  | 2 | 41 | c b7   | 6.6  | 47.6  |
| 1288 | IPI00125439.3 | 36525 | YDDIKK                         | 781.4090  | 1 | 29 | c b4   | 49.1 | 78.1  |
| 1289 | IPI00129011.1 | 59529 | AGEYEALPEK                     | 553.7713  | 2 | 49 | y4     | 62.3 | 111.3 |
| 1290 | IPI00129011.1 | 59529 | DMTDDVFK                       | 485.7131  | 2 | 28 | y6     | 69.8 | 97.8  |
| 1291 | IPI00129011.1 | 59529 | EAQELNLPVVGSQLVGLVPLK          | 1102.6415 | 2 | 47 | c b7 P | 5.9  | 52.9  |
| 1292 | IPI00129011.1 | 59529 | EAQELNLPVVGSQLVGLVPLK          | 1102.6404 | 2 | 48 |        | 0.0  | 48.0  |
| 1293 | IPI00129011.1 | 59529 | ERIEYLVPSGPEQSLLDTSLR          | 877.4612  | 3 | 35 | y++16  | 78.0 | 113.0 |
| 1294 | IPI00129011.1 | 59529 | ERIEYLVPSGPEQSLLDTSLR          | 877.7929  | 3 | 44 | y++16  | 30.7 | 74.7  |
| 1295 | IPI00129011.1 | 59529 | ERIEYLVPSGPEQSLLDTSLR          | 877.7933  | 3 | 45 | y5     | 13.7 | 58.7  |
| 1296 | IPI00129011.1 | 59529 | ERIEYLVPSGPEQSLLDTSLR          | 877.7936  | 3 | 48 | c b7   | 21.2 | 69.2  |
| 1297 | IPI00129011.1 | 59529 | IALNLR                         | 350.2291  | 2 | 29 | y4     | 41.0 | 70.0  |
| 1298 | IPI00129011.1 | 59529 | ISSLLQEAK                      | 494.7881  | 2 | 40 | y5     | 57.1 | 97.1  |
| 1299 | IPI00129011.1 | 59529 | LGLDSLAPFDPK                   | 636.8478  | 2 | 63 | y6     | 38.2 | 101.2 |
| 1300 | IPI00129011.1 | 59529 | LIPPFHAASAQLTSLVDADAR          | 732.0615  | 3 | 18 | y6     | 23.8 | 41.8  |
| 1301 | IPI00129011.1 | 59529 | NLAQVSTNLLDFEVTALHTVFEEARR     | 992.1826  | 3 | 48 |        | 0.0  | 48.0  |
| 1302 | IPI00129011.1 | 59529 | QAVAVPLK                       | 413.2635  | 2 | 22 | y4     | 69.9 | 91.9  |
| 1303 | IPI00129011.1 | 59529 | SAAPGGGSVAAAVALGAALASVMGQMTYGR | 922.1345  | 3 | 43 |        | 0.0  | 43.0  |
| 1304 | IPI00129011.1 | 59529 | SAAPGGGSVAAAVALGAALASVMGQMTYGR | 922.1342  | 3 | 57 | y6     | 1.3  | 58.3  |
| 1305 | IPI00129011.1 | 59529 | SAAPGGGSVAAAVALGAALASVMGQMTYGR | 974.1724  | 3 | 31 |        | 0.0  | 31.0  |
| 1306 | IPI00129011.1 | 59529 | SAAPGGGSVAAAVALGAALASVMGQMTYGR | 974.1726  | 3 | 32 |        | 0.0  | 32.0  |
| 1307 | IPI00129011.1 | 59529 | TASQLIDMSK                     | 547.2821  | 2 | 53 | y8     | 73.4 | 126.4 |
| 1308 | IPI00344499.2 | 98705 | ANYLASPPLVIAYAIAGTVR           | 1031.0829 | 2 | 30 | c b6 P | 0.7  | 30.7  |
| 1309 | IPI00344499.2 | 98705 | ANYLASPPLVIAYAIAGTVR           | 1031.0830 | 2 | 39 | c b6 P | 6.6  | 45.6  |



|      |               |       |                                      |           |   |    |        |       |       |
|------|---------------|-------|--------------------------------------|-----------|---|----|--------|-------|-------|
| 1310 | IPI00344499.2 | 98705 | AVLAESYER                            | 519.2667  | 2 | 42 | y7     | 33.8  | 75.8  |
| 1311 | IPI00344499.2 | 98705 | EPLGVNAQGR                           | 520.7784  | 2 | 28 | y5     | 38.2  | 66.2  |
| 1312 | IPI00344499.2 | 98705 | FVEFFGPGVAQLSIADR                    | 927.4822  | 2 | 56 | y5     | 15.6  | 71.6  |
| 1313 | IPI00344499.2 | 98705 | FVEFFGPGVAQLSIADR                    | 927.4855  | 2 | 65 | c b9   | 30.4  | 95.4  |
| 1314 | IPI00344499.2 | 98705 | GFQVAPDRHNRK                         | 513.9311  | 3 | 16 |        | 0.0   | 16.0  |
| 1315 | IPI00344499.2 | 98705 | GPFLGK                               | 422.7687  | 2 | 46 |        | 0.0   | 46.0  |
| 1316 | IPI00344499.2 | 98705 | GTFANIR                              | 389.7143  | 2 | 33 | y5     | 53.0  | 86.0  |
| 1317 | IPI00344499.2 | 98705 | KLGGNPEK                             | 421.7405  | 2 | 35 | y7     | 46.8  | 81.8  |
| 1318 | IPI00344499.2 | 98705 | LYAWNPK                              | 446.2403  | 2 | 22 | y5     | 53.0  | 75.0  |
| 1319 | IPI00344499.2 | 98705 | NQDLEFER                             | 525.7468  | 2 | 35 | y6     | 53.0  | 88.0  |
| 1320 | IPI00344499.2 | 98705 | QAPQTVHLPSGETLDVFDAAERYQQAGLPLIVLAGK | 959.7629  | 4 | 17 | P y8   | 90.2  | 107.2 |
| 1321 | IPI00344499.2 | 98705 | RFFNLNK                              | 469.7647  | 2 | 20 |        | 0.0   | 20.0  |
| 1322 | IPI00344499.2 | 98705 | RGNDAIMAR                            | 502.2588  | 2 | 28 | y5     | 41.0  | 69.0  |
| 1323 | IPI00344499.2 | 98705 | SNLVGMGVIPLEYPGETADSLGLTGR           | 920.8162  | 3 | 26 | y5     | 6.2   | 32.2  |
| 1324 | IPI00344499.2 | 98705 | SNLVGMGVIPLEYPGETADSLGLTGR           | 920.8163  | 3 | 32 | y8     | 7.1   | 39.1  |
| 1325 | IPI00344499.2 | 98705 | SNLVGMGVIPLEYPGETADSLGLTGR           | 920.8164  | 3 | 35 | y5     | 6.2   | 41.2  |
| 1326 | IPI00344499.2 | 98705 | SPPFFESLTLDLQPPK                     | 908.9805  | 2 | 34 |        | 0.0   | 34.0  |
| 1327 | IPI00344499.2 | 98705 | SWNALAAPSEK                          | 587.2987  | 2 | 41 | P y4   | 49.1  | 90.1  |
| 1328 | IPI00344499.2 | 98705 | TFQAVMR                              | 426.7235  | 2 | 34 | y4     | 16.9  | 50.9  |
| 1329 | IPI00344499.2 | 98705 | VAVSEMKK                             | 446.2526  | 2 | 30 | y6     | 53.0  | 83.0  |
| 1330 | IPI00344499.2 | 98705 | VILQDFTGVPVAVVDFAMR                  | 1025.5481 | 2 | 68 | c b9 P | 2.2   | 70.2  |
| 1331 | IPI00344499.2 | 98705 | VLLEAAVR                             | 435.7742  | 2 | 56 | y6     | 46.8  | 102.8 |
| 1332 | IPI00344499.2 | 98705 | YQQAGLPLIVLAGK                       | 736.4386  | 2 | 27 |        | 0.0   | 27.0  |
| 1333 | IPI00110827.1 | 42366 | EITALAPSTMK                          | 1161.6229 | 1 | 57 | P y5   | 44.5  | 101.5 |
| 1334 | IPI00110827.1 | 42366 | IIAPPERK                             | 308.5272  | 3 | 24 | c b6   | 1.3   | 25.3  |
| 1335 | IPI00110827.1 | 42366 | SYELPDGQVITIGNER                     | 895.9503  | 2 | 76 | y4     | 32.3  | 108.3 |
| 1336 | IPI00110827.1 | 42366 | YPIEHGIITNWDDMEK                     | 654.3151  | 3 | 18 | y6     | 33.8  | 51.8  |
| 1337 | IPI00110827.1 | 42366 | YPIEHGIITNWDDMEK                     | 980.9587  | 2 | 28 |        | 0.0   | 28.0  |
| 1338 | IPI00110827.1 | 42366 | YPIEHGIITNWDDMEK                     | 980.9586  | 2 | 38 | c b8   | 44.3  | 82.3  |
| 1339 | IPI00380348.1 | 63700 | ADNFEYSDPVDGSISK                     | 872.3913  | 2 | 62 | P y8   | 90.2  | 152.2 |
| 1340 | IPI00380348.1 | 63700 | AIGGIILTASHNPGGPNDFGIK               | 736.3950  | 3 | 44 | P y8   | 46.8  | 90.8  |
| 1341 | IPI00380348.1 | 63700 | DLEALMLDR                            | 538.2764  | 2 | 38 | y7     | 12.9  | 50.9  |
| 1342 | IPI00380348.1 | 63700 | FNISNGGPAPEAITDK                     | 816.3983  | 2 | 82 | P y7   | 108.8 | 190.8 |
| 1343 | IPI00380348.1 | 63700 | HGFFVNPSDSVAVIAANIFSIPYFQQTGVR       | 1095.2306 | 3 | 19 | y6     | 1.4   | 20.4  |
| 1344 | IPI00380348.1 | 63700 | HGFFVNPSDSVAVIAANIFSIPYFQQTGVR       | 1095.2306 | 3 | 31 |        | 0.0   | 31.0  |
| 1345 | IPI00380348.1 | 63700 | HGFFVNPSDSVAVIAANIFSIPYFQQTGVR       | 1094.8963 | 3 | 37 | y6     | 23.4  | 60.4  |
| 1346 | IPI00380348.1 | 63700 | IFQISK                               | 368.2238  | 2 | 28 | y5     | 57.1  | 85.1  |
| 1347 | IPI00380348.1 | 63700 | INQDPQVMLAPLISIALK                   | 655.7140  | 3 | 40 | P y8   | 44.3  | 84.3  |
| 1348 | IPI00380348.1 | 63700 | INQDPQVMLAPLISIALK                   | 983.0677  | 2 | 45 | P y8   | 69.8  | 114.8 |
| 1349 | IPI00380348.1 | 63700 | INQDPQVMLAPLISIALK                   | 655.7140  | 3 | 46 | y++9   | 27.2  | 73.2  |
| 1350 | IPI00380348.1 | 63700 | INQDPQVMLAPLISIALK                   | 983.0674  | 2 | 62 | c b8   | 5.4   | 67.4  |

|      |               |       |                                       |           |   |    |        |       |       |
|------|---------------|-------|---------------------------------------|-----------|---|----|--------|-------|-------|
| 1351 | IPI00380348.1 | 63700 | LSGTGSAGATIR                          | 545.7966  | 2 | 49 | y5     | 15.6  | 64.6  |
| 1352 | IPI00380348.1 | 63700 | NIFDFNALK                             | 541.2878  | 2 | 38 | y7     | 46.8  | 84.8  |
| 1353 | IPI00380348.1 | 63700 | QQFDLENK                              | 511.2508  | 2 | 26 | y6     | 33.8  | 59.8  |
| 1354 | IPI00380348.1 | 63700 | QSVEDILK                              | 466.2589  | 2 | 23 |        | 0.0   | 23.0  |
| 1355 | IPI00380348.1 | 63700 | SGEHDFGAAFDGDGDRNMILGK                | 770.6819  | 3 | 33 |        | 0.0   | 33.0  |
| 1356 | IPI00380348.1 | 63700 | SMPTSGALDR                            | 517.7504  | 2 | 39 | P y8   | 69.8  | 108.8 |
| 1357 | IPI00380348.1 | 63700 | TQAYPDQKPGTSGLR                       | 540.2780  | 3 | 27 | c b4 P | 6.6   | 33.6  |
| 1358 | IPI00380348.1 | 63700 | TQAYPDQKPGTSGLRK                      | 582.9759  | 3 | 23 | b4 P   | 27.2  | 50.2  |
| 1359 | IPI00380348.1 | 63700 | VDLGVLGK                              | 400.7477  | 2 | 39 | y5     | 29.5  | 68.5  |
| 1360 | IPI00380348.1 | 63700 | VFQSNANYAENFIQSIVSTVEPALRQEATLVVGGDGR | 996.2638  | 4 | 20 | y5     | 16.9  | 36.9  |
| 1361 | IPI00380348.1 | 63700 | VSQLQER                               | 430.2356  | 2 | 29 | y4     | 27.2  | 56.2  |
| 1362 | IPI00380348.1 | 63700 | YDYEEVEAEGANK                         | 758.8341  | 2 | 58 | y7     | 46.8  | 104.8 |
| 1363 | IPI00127417.1 | 17466 | ASEEHLK                               | 407.2087  | 2 | 37 | y5     | 53.0  | 90.0  |
| 1364 | IPI00127417.1 | 17466 | DRPFFPGLVK                            | 588.3327  | 2 | 22 | c b8   | 22.4  | 44.4  |
| 1365 | IPI00127417.1 | 17466 | DRPFFPGLVK                            | 392.5571  | 3 | 30 | c b5 P | 38.2  | 68.2  |
| 1366 | IPI00127417.1 | 17466 | GLVGEIHK                              | 414.7632  | 2 | 25 | y5     | 62.3  | 87.3  |
| 1367 | IPI00127417.1 | 17466 | NIIHGSDSVESAEK                        | 495.9108  | 3 | 30 | y5     | 62.3  | 92.3  |
| 1368 | IPI00127417.1 | 17466 | NIIHGSDSVESAEK                        | 743.3692  | 2 | 40 | y++12  | 29.0  | 69.0  |
| 1369 | IPI00127417.1 | 17466 | TFIAIKPDGVQR                          | 672.8881  | 2 | 23 | y4     | 44.5  | 67.5  |
| 1370 | IPI00127417.1 | 17466 | VMLGETNPADSKPGTIR                     | 595.9762  | 3 | 36 |        | 0.0   | 36.0  |
| 1371 | IPI00127417.1 | 17466 | VMLGETNPADSKPGTIR                     | 893.4624  | 2 | 70 | P y5   | 53.0  | 123.0 |
| 1372 | IPI00127417.1 | 17466 | YMNSGPVVAMVWEGLNVVK                   | 698.3569  | 3 | 42 | y6     | 41.0  | 83.0  |
| 1373 | IPI00127417.1 | 17466 | YMNSGPVVAMVWEGLNVVK                   | 698.6912  | 3 | 44 |        | 0.0   | 44.0  |
| 1374 | IPI00127417.1 | 17466 | YMNSGPVVAMVWEGLNVVK                   | 698.3569  | 3 | 50 | y6     | 27.2  | 77.2  |
| 1375 | IPI00127417.1 | 17466 | YMNSGPVVAMVWEGLNVVK                   | 1047.5341 | 2 | 61 | y8     | 30.4  | 91.4  |
| 1376 | IPI00127417.1 | 17466 | YMNSGPVVAMVWEGLNVVK                   | 1047.5342 | 2 | 79 | y8     | 29.0  | 108.0 |
| 1377 | IPI00127417.1 | 17466 | YMNSGPVVAMVWEGLNVVK                   | 1047.5343 | 2 | 80 | y8     | 29.0  | 109.0 |
| 1378 | IPI00127417.1 | 17466 | YMNSGPVVAMVWEGLNVVK                   | 1047.0305 | 2 | 88 | y8     | 12.2  | 100.2 |
| 1379 | IPI00126208.1 | 15795 | AAVSGLWVGK                            | 444.7508  | 2 | 28 | y6     | 97.9  | 125.9 |
| 1380 | IPI00126208.1 | 15795 | DFTPAAQAAFQK                          | 647.8333  | 2 | 47 | P y9   | 102.9 | 149.9 |
| 1381 | IPI00126208.1 | 15795 | KVITAFNDGLNHLDSLK                     | 629.0164  | 3 | 38 | y7     | 75.6  | 113.6 |
| 1382 | IPI00126208.1 | 15795 | KVITAFNDGLNHLDSLK                     | 629.3469  | 3 | 39 | y++14  | 48.5  | 87.5  |
| 1383 | IPI00126208.1 | 15795 | LHVDPENFR                             | 376.1931  | 3 | 18 | c b4 P | 49.1  | 67.1  |
| 1384 | IPI00126208.1 | 15795 | LHVDPENFR                             | 563.7861  | 2 | 29 | P y5   | 16.9  | 45.9  |
| 1385 | IPI00126208.1 | 15795 | LLGNMIVIVLGHHLGK                      | 572.0152  | 3 | 29 |        | 0.0   | 29.0  |
| 1386 | IPI00126208.1 | 15795 | LLGNMIVIVLGHHLGK                      | 429.2603  | 4 | 31 | b6     | 1.1   | 32.1  |
| 1387 | IPI00126208.1 | 15795 | VHLTDAEK                              | 456.7427  | 2 | 22 | y6     | 65.2  | 87.2  |
| 1388 | IPI00126208.1 | 15795 | VITAFNDGLNHLDSLK                      | 586.6473  | 3 | 19 |        | 0.0   | 19.0  |
| 1389 | IPI00126208.1 | 15795 | VITAFNDGLNHLDSLK                      | 879.4669  | 2 | 64 | y7     | 53.0  | 117.0 |
| 1390 | IPI00126208.1 | 15795 | VNADEVGGEALGR                         | 643.8209  | 2 | 91 | y7     | 22.4  | 113.4 |
| 1391 | IPI00126208.1 | 15795 | VVAGVAAAALAHK                         | 369.5611  | 3 | 38 |        | 0.0   | 38.0  |

|      |               |       |                                  |           |   |    |        |      |       |
|------|---------------|-------|----------------------------------|-----------|---|----|--------|------|-------|
| 1392 | IPI00126208.1 | 15795 | VVAGVAAALAHK                     | 553.8378  | 2 | 71 | y7     | 49.6 | 120.6 |
| 1393 | IPI00126208.1 | 15795 | YFDSFGDLSSASAIMGNAK              | 991.4583  | 2 | 69 | c b8   | 12.2 | 81.2  |
| 1394 | IPI00126208.1 | 15795 | YFDSFGDLSSASAIMGNAK              | 991.4579  | 2 | 82 | y10    | 27.7 | 109.7 |
| 1395 | IPI00135284.1 | 36092 | VEIVAINDPFIDLNYMVFYQYDSTHGK      | 1108.8645 | 3 | 31 | b6     | 16.9 | 47.9  |
| 1396 | IPI00330804.1 | 89964 | ALLFVPR                          | 408.2603  | 2 | 27 | y4     | 27.2 | 54.2  |
| 1397 | IPI00330804.1 | 89964 | DNSTMGYMAAK                      | 594.7558  | 2 | 51 | y6     | 35.8 | 86.8  |
| 1398 | IPI00330804.1 | 89964 | DQVANSAFVER                      | 618.3049  | 2 | 50 | y8     | 12.2 | 62.2  |
| 1399 | IPI00330804.1 | 89964 | EDQTEYLEER                       | 656.2916  | 2 | 42 | y5     | 25.4 | 67.4  |
| 1400 | IPI00330804.1 | 89964 | FYEQFSK                          | 474.7272  | 2 | 37 | y5     | 53.0 | 90.0  |
| 1401 | IPI00330804.1 | 89964 | HIYFITGETK                       | 604.8200  | 2 | 27 | y8     | 85.6 | 112.6 |
| 1402 | IPI00330804.1 | 89964 | HLEINPDHSIETLR                   | 596.3203  | 3 | 48 | y7     | 5.6  | 53.6  |
| 1403 | IPI00330804.1 | 89964 | LGIHEDSQNR                       | 390.1952  | 3 | 40 | y4     | 6.6  | 46.6  |
| 1404 | IPI00330804.1 | 89964 | LGIHEDSQNRK                      | 432.8932  | 3 | 22 | c b6   | 41.0 | 63.0  |
| 1405 | IPI00330804.1 | 89964 | TLTIVDTGIGMTK                    | 675.3717  | 2 | 41 | y9     | 29.0 | 70.0  |
| 1406 | IPI00330804.1 | 89964 | TLTIVDTGIGMTK                    | 675.3717  | 2 | 60 | y8     | 58.1 | 118.1 |
| 1407 | IPI00330804.1 | 89964 | TLTIVDTGIGMTK                    | 675.3715  | 2 | 66 | y8     | 61.4 | 127.4 |
| 1408 | IPI00134475.2 | 40636 | AMGAAQVVVTDLSASR                 | 525.9443  | 3 | 60 | y4     | 27.2 | 87.2  |
| 1409 | IPI00134475.2 | 40636 | AMGAAQVVVTDLSASR                 | 788.4111  | 2 | 80 | y9     | 52.8 | 132.8 |
| 1410 | IPI00134475.2 | 40636 | AVEAFETAK                        | 483.2503  | 2 | 28 | y7     | 65.2 | 93.2  |
| 1411 | IPI00134475.2 | 40636 | AVEAFETAKK                       | 547.2983  | 2 | 38 | y8     | 58.1 | 96.1  |
| 1412 | IPI00134475.2 | 40636 | ETPQEIASK                        | 501.7594  | 2 | 25 |        | 0.0  | 25.0  |
| 1413 | IPI00134475.2 | 40636 | GENLSLVVHGPGDIR                  | 781.9193  | 2 | 39 | c b9   | 5.0  | 44.0  |
| 1414 | IPI00134475.2 | 40636 | GENLSLVVHGPGDIRLENYPIPELGPNDVLLK | 1156.9592 | 3 | 41 | b9     | 5.0  | 46.0  |
| 1415 | IPI00134475.2 | 40636 | GENLSLVVHGPGDIRLENYPIPELGPNDVLLK | 1156.9586 | 3 | 45 | y8     | 12.9 | 57.9  |
| 1416 | IPI00134475.2 | 40636 | GENLSLVVHGPGDIRLENYPIPELGPNDVLLK | 1156.9585 | 3 | 48 |        | 0.0  | 48.0  |
| 1417 | IPI00134475.2 | 40636 | GSVSLGNK                         | 381.2115  | 2 | 41 | y5     | 38.2 | 79.2  |
| 1418 | IPI00134475.2 | 40636 | HLKPGDR                          | 822.4588  | 1 | 21 |        | 0.0  | 21.0  |
| 1419 | IPI00134475.2 | 40636 | HLKPGDR                          | 411.7328  | 2 | 28 | y5     | 49.6 | 77.6  |
| 1420 | IPI00134475.2 | 40636 | IGDFVVK                          | 389.2291  | 2 | 54 | y5     | 89.0 | 143.0 |
| 1421 | IPI00134475.2 | 40636 | KPMVLGHEAAGTVTK                  | 513.6176  | 3 | 25 |        | 0.0  | 25.0  |
| 1422 | IPI00134475.2 | 40636 | KPMVLGHEAAGTVTK                  | 769.9273  | 2 | 82 | y10    | 72.2 | 154.2 |
| 1423 | IPI00134475.2 | 40636 | LENYPIPELGPNDVLLK                | 963.0271  | 2 | 24 | y8     | 33.8 | 57.8  |
| 1424 | IPI00134475.2 | 40636 | LENYPIPELGPNDVLLK                | 963.0272  | 2 | 30 | c b4 P | 18.5 | 48.5  |
| 1425 | IPI00134475.2 | 40636 | LENYPIPELGPNDVLLK                | 963.0270  | 2 | 37 | y8     | 44.3 | 81.3  |
| 1426 | IPI00134475.2 | 40636 | PLVTHRFPLEK                      | 668.8908  | 2 | 29 | c b7 P | 14.6 | 43.6  |
| 1427 | IPI00134475.2 | 40636 | RGSVSLGNK                        | 459.2615  | 2 | 26 | c b7   | 1.8  | 27.8  |
| 1428 | IPI00134475.2 | 40636 | TLNVKPLVTHR                      | 426.5943  | 3 | 28 |        | 0.0  | 28.0  |
| 1429 | IPI00134475.2 | 40636 | TLNVKPLVTHRFPLEK                 | 631.7100  | 3 | 15 |        | 0.0  | 15.0  |
| 1430 | IPI00134475.2 | 40636 | TLNVKPLVTHRFPLEK                 | 631.3768  | 3 | 17 |        | 0.0  | 17.0  |
| 1431 | IPI00134475.2 | 40636 | VAIEPGVPR                        | 469.2773  | 2 | 51 | P y5   | 69.8 | 120.8 |
| 1432 | IPI00134475.2 | 40636 | VGELVK                           | 322.7026  | 2 | 52 | y5     | 62.3 | 114.3 |

|      |               |       |                                   |           |   |     |         |      |       |
|------|---------------|-------|-----------------------------------|-----------|---|-----|---------|------|-------|
| 1433 | IPI00310035.3 | 46416 | ASLQNLLSASQAR                     | 679.8730  | 2 | 63  | y6      | 14.6 | 77.6  |
| 1434 | IPI00310035.3 | 46416 | ASSIVVSGTPIR                      | 593.8442  | 2 | 51  | y5      | 38.2 | 89.2  |
| 1435 | IPI00310035.3 | 46416 | DIQQWEYVPLGPFLGK                  | 945.9953  | 2 | 34  | P y8    | 44.3 | 78.3  |
| 1436 | IPI00310035.3 | 46416 | DIQQWEYVPLGPFLGK                  | 945.9952  | 2 | 44  | P y8    | 32.0 | 76.0  |
| 1437 | IPI00310035.3 | 46416 | DIQQWEYVPLGPFLGK                  | 945.9955  | 2 | 45  | P y8    | 44.3 | 89.3  |
| 1438 | IPI00310035.3 | 46416 | ENALLPNWLHLPVGYHGR                | 696.3716  | 3 | 15  |         | 0.0  | 15.0  |
| 1439 | IPI00310035.3 | 46416 | ENALLPNWLHLPVGYHGR                | 522.5312  | 4 | 16  |         | 0.0  | 16.0  |
| 1440 | IPI00310035.3 | 46416 | FGEPIPIISK                        | 494.2787  | 2 | 30  | P y4    | 44.5 | 74.5  |
| 1441 | IPI00310035.3 | 46416 | HLFTGPALSK                        | 535.8037  | 2 | 40  | y8      | 11.6 | 51.6  |
| 1442 | IPI00310035.3 | 46416 | HQHVFDETTLNNFMGLGQAAWK            | 637.0576  | 4 | 20  | y6      | 62.3 | 82.3  |
| 1443 | IPI00310035.3 | 46416 | HQHVFDETTLNNFMGLGQAAWK            | 849.0749  | 3 | 56  |         | 0.0  | 56.0  |
| 1444 | IPI00310035.3 | 46416 | HQHVFDETTLNNFMGLGQAAWK            | 849.0749  | 3 | 62  | y6      | 25.4 | 87.4  |
| 1445 | IPI00310035.3 | 46416 | SFGTTISPWWPMDALMPFVVPNPK          | 911.1390  | 3 | 28  | P y8    | 90.2 | 118.2 |
| 1446 | IPI00310035.3 | 46416 | SFIPVAEDSDFPIQNLPGYGVFSTQSNPK     | 1047.5192 | 3 | 28  | P y++12 | 35.5 | 63.5  |
| 1447 | IPI00310035.3 | 46416 | SFIPVAEDSDFPIQNLPGYGVFSTQSNPKPR   | 1132.2366 | 3 | 70  |         | 0.0  | 70.0  |
| 1448 | IPI00267407.1 | 54371 | DSYDFFTEIK                        | 632.7905  | 2 | 18  | y7      | 49.6 | 67.6  |
| 1449 | IPI00267407.1 | 54371 | DSYDFFTEIK                        | 632.7905  | 2 | 35  | y7      | 35.8 | 70.8  |
| 1450 | IPI00267407.1 | 54371 | ELLMLENFIGGK                      | 682.3707  | 2 | 64  | y7      | 46.8 | 110.8 |
| 1451 | IPI00267407.1 | 54371 | ELNLPFGGMK                        | 553.2886  | 2 | 33  | P y6    | 95.7 | 128.7 |
| 1452 | IPI00267407.1 | 54371 | IAPAIAAGNTVIAK                    | 655.3984  | 2 | 59  | y7      | 35.8 | 94.8  |
| 1453 | IPI00267407.1 | 54371 | LADVLEQSLEELAQAESK                | 658.3399  | 3 | 43  | y6      | 23.8 | 66.8  |
| 1454 | IPI00267407.1 | 54371 | LADVLEQSLEELAQAESK                | 987.0069  | 2 | 63  | y6      | 65.2 | 128.2 |
| 1455 | IPI00267407.1 | 54371 | LADVLEQSLEELAQAESK                | 987.0067  | 2 | 101 | y4      | 15.6 | 116.6 |
| 1456 | IPI00267407.1 | 54371 | SLVLNR                            | 351.2187  | 2 | 20  | y4      | 16.9 | 36.9  |
| 1457 | IPI00267407.1 | 54371 | VGEALVSHPEVPLISFTGSQPTAER         | 874.7914  | 3 | 24  | y8      | 5.2  | 29.2  |
| 1458 | IPI00267407.1 | 54371 | VGEALVSHPEVPLISFTGSQPTAER         | 874.7918  | 3 | 27  | P y5    | 38.2 | 65.2  |
| 1459 | IPI00267407.1 | 54371 | VGVPSPSANMGALISK                  | 821.9268  | 2 | 35  | y6      | 29.5 | 64.5  |
| 1460 | IPI00267407.1 | 54371 | VGVPSPSANMGALISK                  | 821.9268  | 2 | 60  | c b6 P  | 27.2 | 87.2  |
| 1461 | IPI00267407.1 | 54371 | VPNSGKEIEAAVEAAR                  | 590.6399  | 3 | 38  | y4      | 15.6 | 53.6  |
| 1462 | IPI00267407.1 | 54371 | YGLAATVWSK                        | 548.2951  | 2 | 54  | y7      | 46.8 | 100.8 |
| 1463 | IPI00230084.3 | 56066 | AWNIAWADIPAPK                     | 691.3745  | 2 | 72  | P y4    | 41.0 | 113.0 |
| 1464 | IPI00230084.3 | 56066 | DYEETIGK                          | 477.7242  | 2 | 21  | y6      | 49.6 | 70.6  |
| 1465 | IPI00230084.3 | 56066 | EVALMVQER                         | 537.7851  | 2 | 48  | y5      | 25.4 | 73.4  |
| 1466 | IPI00230084.3 | 56066 | FQDEEEVFEWNNNEVK                  | 971.9347  | 2 | 79  | y6      | 12.9 | 91.9  |
| 1467 | IPI00230084.3 | 56066 | GAPTTSLVSVAVTK                    | 665.8874  | 2 | 60  | y6      | 49.6 | 109.6 |
| 1468 | IPI00230084.3 | 56066 | LVSLEMVK                          | 438.7466  | 2 | 27  | y6      | 65.2 | 92.2  |
| 1469 | IPI00230084.3 | 56066 | QAVSMFVR                          | 469.2504  | 2 | 34  |         | 0.0  | 34.0  |
| 1470 | IPI00230084.3 | 56066 | QGLSSSIFTK                        | 534.2900  | 2 | 33  | y5      | 44.5 | 77.5  |
| 1471 | IPI00230084.3 | 56066 | STLLIHHPQYAWLQDLGLREDNEGVYNGSWGGR | 957.2240  | 4 | 60  | y++18   | 8.4  | 68.4  |
| 1472 | IPI00230084.3 | 56066 | STLLIHHPQYAWLQDLGLREDNEGVYNGSWGGR | 957.2197  | 4 | 72  | y8      | 11.6 | 83.6  |
| 1473 | IPI00230084.3 | 56066 | VGNPWDPNLYGPLHTK                  | 641.3391  | 3 | 18  |         | 0.0  | 18.0  |

|      |               |       |                              |           |   |    |         |      |       |
|------|---------------|-------|------------------------------|-----------|---|----|---------|------|-------|
| 1474 | IPI00230084.3 | 56066 | VGNPWDPNILYGPLHTK            | 641.0035  | 3 | 22 | P y++11 | 58.1 | 80.1  |
| 1475 | IPI00230084.3 | 56066 | VGNPWDPNILYGPLHTK            | 641.3374  | 3 | 33 | y7      | 23.8 | 56.8  |
| 1476 | IPI00230084.3 | 56066 | VNLLSFTGSTQVGK               | 725.8972  | 2 | 46 | y8      | 5.6  | 51.6  |
| 1477 | IPI00230084.3 | 56066 | VRQASLK                      | 401.2507  | 2 | 24 | b5      | 27.2 | 51.2  |
| 1478 | IPI00319652.1 | 22553 | AHPLFTFLR                    | 367.8784  | 3 | 20 |         | 0.0  | 20.0  |
| 1479 | IPI00319652.1 | 22553 | AHPLFTFLR                    | 551.3145  | 2 | 44 | P y7    | 61.4 | 105.4 |
| 1480 | IPI00319652.1 | 22553 | FLVGPDPVPRR                  | 656.3812  | 2 | 27 | y6      | 25.4 | 52.4  |
| 1481 | IPI00319652.1 | 22553 | FRTIDIEPDIETLLSQQSGNS        | 1182.5902 | 2 | 54 | c b7 P  | 22.4 | 76.4  |
| 1482 | IPI00319652.1 | 22553 | LSAAAQSTVYAFSARPLTGGEVSLGSLR | 969.8515  | 3 | 50 | y++19   | 7.7  | 57.7  |
| 1483 | IPI00319652.1 | 22553 | LSAAAQSTVYAFSARPLTGGEVSLGSLR | 969.8519  | 3 | 69 | P y8    | 11.6 | 80.6  |
| 1484 | IPI00319652.1 | 22553 | NDIAWNFEK                    | 568.7731  | 2 | 48 | y6      | 82.7 | 130.7 |
| 1485 | IPI00319652.1 | 22553 | TIDIEPDIETLLSQQSGNS          | 1031.0064 | 2 | 38 | c b5 P  | 44.5 | 82.5  |
| 1486 | IPI00319652.1 | 22553 | TIDIEPDIETLLSQQSGNS          | 687.6735  | 3 | 40 |         | 0.0  | 40.0  |
| 1487 | IPI00319652.1 | 22553 | TIDIEPDIETLLSQQSGNS          | 687.6735  | 3 | 50 |         | 0.0  | 50.0  |
| 1488 | IPI00319652.1 | 22553 | TIDIEPDIETLLSQQSGNS          | 1030.5043 | 2 | 54 | y7      | 58.1 | 112.1 |
| 1489 | IPI00319652.1 | 22553 | YVRPGGGFEPNFTLFEK            | 653.3363  | 3 | 25 |         | 0.0  | 25.0  |
| 1490 | IPI00319652.1 | 22553 | YVRPGGGFEPNFTLFEK            | 653.3316  | 3 | 28 | c b9 P  | 55.3 | 83.3  |
| 1491 | IPI00319652.1 | 22553 | YVRPGGGFEPNFTLFEK            | 979.9967  | 2 | 52 | c b9 P  | 19.2 | 71.2  |
| 1492 | IPI00121267.1 | 75227 | APVVLSR                      | 371.2349  | 2 | 48 | y4      | 15.6 | 63.6  |
| 1493 | IPI00121267.1 | 75227 | EVLSLGYHGNVVDLWER            | 662.6725  | 3 | 21 | y5      | 29.5 | 50.5  |
| 1494 | IPI00121267.1 | 75227 | EVLSLGYHGNVVDLWER            | 663.0075  | 3 | 26 | y5      | 27.2 | 53.2  |
| 1495 | IPI00121267.1 | 75227 | HLVQESLRR                    | 379.8877  | 3 | 23 | c b5    | 7.1  | 30.1  |
| 1496 | IPI00121267.1 | 75227 | HLVQESLRR                    | 569.3283  | 2 | 24 | c b8    | 21.2 | 45.2  |
| 1497 | IPI00121267.1 | 75227 | HQLVVG SQAR                  | 365.5408  | 3 | 22 |         | 0.0  | 22.0  |
| 1498 | IPI00121267.1 | 75227 | HQLVVG SQAR                  | 547.8071  | 2 | 38 | y8      | 30.4 | 68.4  |
| 1499 | IPI00121267.1 | 75227 | HVAAINR                      | 390.7274  | 2 | 16 | y5      | 41.0 | 57.0  |
| 1500 | IPI00121267.1 | 75227 | ILYSDQK                      | 433.7348  | 2 | 25 | y5      | 53.0 | 78.0  |
| 1501 | IPI00121267.1 | 75227 | LLALEFAQELR                  | 651.8740  | 2 | 60 | y6      | 53.0 | 113.0 |
| 1502 | IPI00121267.1 | 75227 | LQYMDNIR                     | 526.7636  | 2 | 26 | y6      | 35.8 | 61.8  |
| 1503 | IPI00121267.1 | 75227 | LTMSYLSK                     | 471.7520  | 2 | 16 | y5      | 75.6 | 91.6  |
| 1504 | IPI00121267.1 | 75227 | LVITNGMVIPNYSSR              | 832.9472  | 2 | 50 | P y6    | 38.2 | 88.2  |
| 1505 | IPI00121267.1 | 75227 | MTEEQLVMYSGHPLGLFPSSPR       | 860.0904  | 3 | 54 | P y5    | 6.6  | 60.6  |
| 1506 | IPI00121267.1 | 75227 | MTEEQLVMYSGHPLGLFPSSPR       | 860.0903  | 3 | 64 | P y5    | 27.2 | 91.2  |
| 1507 | IPI00121267.1 | 75227 | QFGHIYMYR                    | 405.5308  | 3 | 17 |         | 0.0  | 17.0  |
| 1508 | IPI00121267.1 | 75227 | TPNLSPEEEQLALR               | 799.4160  | 2 | 37 | c b5 P  | 18.5 | 55.5  |
| 1509 | IPI00121267.1 | 75227 | VFVTSGLGMSG AQAK             | 755.8916  | 2 | 58 | y6      | 38.2 | 96.2  |
| 1510 | IPI00121267.1 | 75227 | WAGVP HAPVR                  | 363.8699  | 3 | 16 | y4      | 16.9 | 32.9  |
| 1511 | IPI00121267.1 | 75227 | YLG IENLAGK                  | 539.3002  | 2 | 35 | y6      | 33.8 | 68.8  |
| 1512 | IPI00121267.1 | 75227 | YPSYVQHIMGDIFSQQGF PFR       | 816.3938  | 3 | 42 | y6      | 6.2  | 48.2  |
| 1513 | IPI00230204.5 | 46488 | APPSVFAQVPQAPPVLVFK          | 665.0508  | 3 | 16 | c b9 P  | 11.6 | 27.6  |
| 1514 | IPI00230204.5 | 46488 | APPSVFAQVPQAPPVLVFK          | 997.0749  | 2 | 39 |         | 0.0  | 39.0  |

|      |               |       |                                  |           |   |    |        |      |       |
|------|---------------|-------|----------------------------------|-----------|---|----|--------|------|-------|
| 1515 | IPI00230204.5 | 46488 | APPSVFAQVPQAPPVLVFK              | 997.0710  | 2 | 40 | c b9 P | 19.2 | 59.2  |
| 1516 | IPI00230204.5 | 46488 | ARLEALK                          | 400.7535  | 2 | 17 | c b4   | 16.9 | 33.9  |
| 1517 | IPI00230204.5 | 46488 | FLFPFFDSAYQGFAFGDLEK             | 1144.0415 | 2 | 60 | y6     | 29.5 | 89.5  |
| 1518 | IPI00230204.5 | 46488 | FLFPFFDSAYQGFAFGDLEK             | 1144.0414 | 2 | 89 | y7     | 23.8 | 112.8 |
| 1519 | IPI00230204.5 | 46488 | HIYLLPSGR                        | 528.3032  | 2 | 36 | y7     | 32.0 | 68.0  |
| 1520 | IPI00230204.5 | 46488 | IANDNSLNHEYLPIGLAEFR             | 800.7501  | 3 | 25 | y6     | 6.2  | 31.2  |
| 1521 | IPI00230204.5 | 46488 | IANDNSLNHEYLPIGLAEFR             | 800.7501  | 3 | 31 | y6     | 6.2  | 37.2  |
| 1522 | IPI00230204.5 | 46488 | IANDNSLNHEYLPIGLAEFR             | 800.7503  | 3 | 37 | y4     | 16.9 | 53.9  |
| 1523 | IPI00230204.5 | 46488 | IGADFLGR                         | 424.7354  | 2 | 53 | y7     | 46.8 | 99.8  |
| 1524 | IPI00230204.5 | 46488 | LTADFRDDPDPRK                    | 515.9266  | 3 | 22 | y++11  | 21.2 | 43.2  |
| 1525 | IPI00230204.5 | 46488 | NFGLYNER                         | 506.7460  | 2 | 23 | y4     | 44.5 | 67.5  |
| 1526 | IPI00230204.5 | 46488 | NTPIYVSSPTWENHNAVSAAGFK          | 880.0956  | 3 | 17 |        | 0.0  | 17.0  |
| 1527 | IPI00230204.5 | 46488 | QVEYLVNEK                        | 561.2959  | 2 | 28 | y5     | 53.0 | 81.0  |
| 1528 | IPI00230204.5 | 46488 | VGGVQSLGGTGALR                   | 636.3588  | 2 | 30 | y9     | 4.8  | 34.8  |
| 1529 | IPI00230204.5 | 46488 | VGNLTVVGK                        | 443.7715  | 2 | 70 | y7     | 13.7 | 83.7  |
| 1530 | IPI00230204.5 | 46488 | VNLGVGAYRTDESQPWWLPVVR           | 819.4418  | 3 | 28 | P y8   | 85.6 | 113.6 |
| 1531 | IPI00133549.1 | 52410 | AAVLENGVLSR                      | 635.3607  | 2 | 56 |        | 0.0  | 56.0  |
| 1532 | IPI00133549.1 | 52410 | AAVLENGVLSR                      | 635.3607  | 2 | 57 |        | 0.0  | 57.0  |
| 1533 | IPI00133549.1 | 52410 | DFLGGLAFR                        | 498.2696  | 2 | 49 | y6     | 23.8 | 72.8  |
| 1534 | IPI00133549.1 | 52410 | FANQILSYGAELDADHPGFKDPVYR        | 706.8502  | 4 | 41 | y++15  | 10.1 | 51.1  |
| 1535 | IPI00133549.1 | 52410 | HGQPIPR                          | 402.7277  | 2 | 37 | y6     | 25.4 | 62.4  |
| 1536 | IPI00133549.1 | 52410 | LNKDEYEFFTYLDK                   | 609.2963  | 3 | 30 | y5     | 53.0 | 83.0  |
| 1537 | IPI00133549.1 | 52410 | LRPVAGLLSSR                      | 390.2433  | 3 | 24 | y4     | 16.9 | 40.9  |
| 1538 | IPI00133549.1 | 52410 | LRPVAGLLSSR                      | 584.8619  | 2 | 34 | P y9   | 52.8 | 86.8  |
| 1539 | IPI00133549.1 | 52410 | NDIGATVHELRSR                    | 656.3388  | 2 | 54 | y9     | 52.8 | 106.8 |
| 1540 | IPI00133549.1 | 52410 | QFADIAYNYR                       | 630.8071  | 2 | 49 | y4     | 44.5 | 93.5  |
| 1541 | IPI00133549.1 | 52410 | RSKPVLGSIK                       | 599.3870  | 2 | 39 | c b9   | 2.2  | 41.2  |
| 1542 | IPI00133549.1 | 52410 | SLRNDIGATVHELRSR                 | 556.6321  | 3 | 64 | y4     | 27.2 | 91.2  |
| 1543 | IPI00133549.1 | 52410 | TFAATIPRPFVSR                    | 488.2776  | 3 | 19 | y++12  | 5.0  | 24.0  |
| 1544 | IPI00133549.1 | 52410 | TIQELDRFANQILSYGAELDADHPGFKDPVYR | 920.9612  | 4 | 20 | y++14  | 16.1 | 36.1  |
| 1545 | IPI00133549.1 | 52410 | TIQELDRFANQILSYGAELDADHPGFKDPVYR | 920.9613  | 4 | 33 | P y4   | 18.5 | 51.5  |
| 1546 | IPI00133549.1 | 52410 | TWGTVFR                          | 433.7301  | 2 | 23 | y5     | 29.5 | 52.5  |
| 1547 | IPI00133549.1 | 52410 | VEVLDNTQQLK                      | 643.8512  | 2 | 51 | y7     | 33.8 | 84.8  |
| 1548 | IPI00133549.1 | 52410 | VEYTEERK                         | 394.8596  | 3 | 20 |        | 0.0  | 20.0  |
| 1549 | IPI00331241.5 | 25270 | ADIALVELLYHVEELDPGVVDNFPLLK      | 1008.2103 | 3 | 19 |        | 0.0  | 19.0  |
| 1550 | IPI00331241.5 | 25270 | ADIALVELLYHVEELDPGVVDNFPLLK      | 1008.2153 | 3 | 23 |        | 0.0  | 23.0  |
| 1551 | IPI00331241.5 | 25270 | ADIALVELLYHVEELDPGVVDNFPLLK      | 1008.2151 | 3 | 26 |        | 0.0  | 26.0  |
| 1552 | IPI00331241.5 | 25270 | ADIALVELLYHVEELDPGVVDNFPLLK      | 1008.2141 | 3 | 28 | y6     | 29.5 | 57.5  |
| 1553 | IPI00331241.5 | 25270 | ADIALVELLYHVEELDPGVVDNFPLLK      | 1008.2106 | 3 | 33 | y8     | 21.2 | 54.2  |
| 1554 | IPI00331241.5 | 25270 | ADIALVELLYHVEELDPGVVDNFPLLK      | 1008.2104 | 3 | 35 | P y4   | 49.1 | 84.1  |
| 1555 | IPI00331241.5 | 25270 | ADIALVELLYHVEELDPGVVDNFPLLK      | 1008.2102 | 3 | 41 | y8     | 33.8 | 74.8  |

|      |               |       |                         |           |   |    |      |      |       |
|------|---------------|-------|-------------------------|-----------|---|----|------|------|-------|
| 1556 | IPI00331241.5 | 25270 | AGKPVLYHYFDGR           | 467.9139  | 3 | 28 | y5   | 38.2 | 66.2  |
| 1557 | IPI00331241.5 | 25270 | AGKPVLYHYFDGR           | 467.9139  | 3 | 41 | y4   | 15.6 | 56.6  |
| 1558 | IPI00331241.5 | 25270 | AGKPVLYHYFDGR           | 701.3747  | 2 | 43 | y6   | 49.6 | 92.6  |
| 1559 | IPI00331241.5 | 25270 | AILNYIASK               | 496.7926  | 2 | 20 | y7   | 49.6 | 69.6  |
| 1560 | IPI00331241.5 | 25270 | AILNYIASK               | 992.5791  | 1 | 25 |      | 0.0  | 25.0  |
| 1561 | IPI00331241.5 | 25270 | AILNYIASK               | 496.7926  | 2 | 43 | y7   | 65.2 | 108.2 |
| 1562 | IPI00331241.5 | 25270 | FLQPGSQR                | 466.7510  | 2 | 35 | P y5 | 15.6 | 50.6  |
| 1563 | IPI00331241.5 | 25270 | KPFDDAK                 | 410.7136  | 2 | 29 | c b5 | 41.0 | 70.0  |
| 1564 | IPI00331241.5 | 25270 | LRSDGSLMFQQVPMVEIDGMK   | 794.7252  | 3 | 26 | b8   | 1.4  | 27.4  |
| 1565 | IPI00331241.5 | 25270 | LRSDGSLMFQQVPMVEIDGMK   | 794.7276  | 3 | 27 |      | 0.0  | 27.0  |
| 1566 | IPI00331241.5 | 25270 | LRSDGSLMFQQVPMVEIDGMK   | 1191.5940 | 2 | 41 | c b8 | 6.2  | 47.2  |
| 1567 | IPI00331241.5 | 25270 | LRSDGSLMFQQVPMVEIDGMK   | 1191.5881 | 2 | 42 | y5   | 23.4 | 65.4  |
| 1568 | IPI00331241.5 | 25270 | NRYFPAFEK               | 391.2014  | 3 | 18 | P y5 | 62.3 | 80.3  |
| 1569 | IPI00331241.5 | 25270 | SDGSLMFQQVPMVEIDGMK     | 1056.9937 | 2 | 52 | c b9 | 21.2 | 73.2  |
| 1570 | IPI00331241.5 | 25270 | SDGSLMFQQVPMVEIDGMK     | 1056.9938 | 2 | 54 | y7   | 15.6 | 69.6  |
| 1571 | IPI00331241.5 | 25270 | SHGQDYLVGNR             | 623.3019  | 2 | 48 | y6   | 22.4 | 70.4  |
| 1572 | IPI00331241.5 | 25270 | VSNLPTVK                | 429.2581  | 2 | 35 | P y4 | 18.5 | 53.5  |
| 1573 | IPI00331241.5 | 25270 | VSNLPTVKK               | 493.3063  | 2 | 41 | y7   | 38.2 | 79.2  |
| 1574 | IPI00331241.5 | 25270 | VSNLPTVKK               | 493.3063  | 2 | 46 |      | 0.0  | 46.0  |
| 1575 | IPI00331241.5 | 25270 | WLLAAAGVEFE EK          | 731.8914  | 2 | 18 |      | 0.0  | 18.0  |
| 1576 | IPI00331241.5 | 25270 | WLLAAAGVEFE EK          | 731.8830  | 2 | 63 | y7   | 46.8 | 109.8 |
| 1577 | IPI00331241.5 | 25270 | YFPAFEK                 | 451.2263  | 2 | 19 | P y5 | 57.1 | 76.1  |
| 1578 | IPI00331241.5 | 25270 | YFPAFEK                 | 901.4455  | 1 | 30 | P y5 | 57.1 | 87.1  |
| 1579 | IPI00331241.5 | 25270 | YNLYGK                  | 757.3915  | 1 | 18 |      | 0.0  | 18.0  |
| 1580 | IPI00331241.5 | 25270 | YNLYGK                  | 379.1975  | 2 | 30 | y5   | 38.2 | 68.2  |
| 1581 | IPI00122342.6 | 90868 | ASGADSKGDDLSTAILK       | 845.9282  | 2 | 71 | y7   | 33.8 | 104.8 |
| 1582 | IPI00122342.6 | 90868 | ELQELVQYPVEHPDK         | 912.4628  | 2 | 62 | y8   | 58.1 | 120.1 |
| 1583 | IPI00122342.6 | 90868 | GILLYGPPGTGK            | 586.8374  | 2 | 36 | y7   | 33.8 | 69.8  |
| 1584 | IPI00122342.6 | 90868 | IVSQLLTLMDGLK           | 716.4195  | 2 | 69 | y7   | 33.8 | 102.8 |
| 1585 | IPI00122342.6 | 90868 | KGDIFLVR                | 474.2879  | 2 | 33 | y5   | 44.5 | 77.5  |
| 1586 | IPI00122342.6 | 90868 | KYEMFAQTLQQSR           | 543.9403  | 3 | 29 | y4   | 15.6 | 44.6  |
| 1587 | IPI00122342.6 | 90868 | LAGESESNLRK             | 602.3199  | 2 | 50 | y7   | 23.8 | 73.8  |
| 1588 | IPI00122342.6 | 90868 | LDQLIYIPLPEK            | 778.9314  | 2 | 44 | P y6 | 53.0 | 97.0  |
| 1589 | IPI00122342.6 | 90868 | LIVDEAINEDNSVLSQPK      | 1086.0644 | 2 | 82 | y4   | 27.2 | 109.2 |
| 1590 | IPI00122342.6 | 90868 | MDELQLFRGDTVLLK         | 593.6566  | 3 | 22 |      | 0.0  | 22.0  |
| 1591 | IPI00122342.6 | 90868 | MDELQLFRGDTVLLK         | 889.9806  | 2 | 33 | y5   | 53.0 | 86.0  |
| 1592 | IPI00122342.6 | 90868 | NVFIIGATNRPDIIDPAILRPGR | 840.4801  | 3 | 21 | P y8 | 1.8  | 22.8  |
| 1593 | IPI00122342.6 | 90868 | PYFLEAYRPIR             | 475.5946  | 3 | 19 |      | 0.0  | 19.0  |
| 1594 | IPI00122342.6 | 90868 | VINQILTEMDGMSTK         | 840.9244  | 2 | 55 | y9   | 30.4 | 85.4  |
| 1595 | IPI00122342.6 | 90868 | WALSQSNPSALR            | 665.3559  | 2 | 57 | y9   | 20.1 | 77.1  |
| 1596 | IPI00139788.2 | 78841 | ASDTSITWNNLK            | 675.3467  | 2 | 52 | y6   | 77.6 | 129.6 |

|      |               |       |                          |           |   |     |       |      |       |
|------|---------------|-------|--------------------------|-----------|---|-----|-------|------|-------|
| 1597 | IPI00139788.2 | 78841 | DGGGDVAFVK               | 482.7401  | 2 | 74  |       | 0.0  | 74.0  |
| 1598 | IPI00139788.2 | 78841 | DLLFRDDTK                | 561.7928  | 2 | 42  | c b7  | 35.8 | 77.8  |
| 1599 | IPI00139788.2 | 78841 | HQTVLDNTEGK              | 621.3099  | 2 | 57  | y9    | 40.2 | 97.2  |
| 1600 | IPI00139788.2 | 78841 | HQTVLDNTEGKNPAEWAK       | 680.0070  | 3 | 29  | y7    | 35.8 | 64.8  |
| 1601 | IPI00139788.2 | 78841 | HTTIFEVLPEK              | 657.3641  | 2 | 22  |       | 0.0  | 22.0  |
| 1602 | IPI00139788.2 | 78841 | IPSHAVVAR                | 475.2826  | 2 | 40  | y7    | 61.4 | 101.4 |
| 1603 | IPI00139788.2 | 78841 | KGTFQLNQLEGKK            | 535.9587  | 3 | 24  |       | 0.0  | 24.0  |
| 1604 | IPI00139788.2 | 78841 | LPEGTTPEK                | 486.2555  | 2 | 32  |       | 0.0  | 32.0  |
| 1605 | IPI00139788.2 | 78841 | NNGKEDIWEILK             | 786.4270  | 2 | 44  | y5    | 38.2 | 82.2  |
| 1606 | IPI00139788.2 | 78841 | TAGWNIPMGMLYNR           | 812.3918  | 2 | 50  | P y8  | 42.2 | 92.2  |
| 1607 | IPI00139788.2 | 78841 | VAQEHFGK                 | 458.2376  | 2 | 35  |       | 0.0  | 35.0  |
| 1608 | IPI00139788.2 | 78841 | YLGAEYMQSVGNMR           | 809.8722  | 2 | 88  | y4    | 29.5 | 117.5 |
| 1609 | IPI00117350.1 | 50634 | AVFVDLEPTVIDEIR          | 858.4636  | 2 | 65  | P y8  | 69.8 | 134.8 |
| 1610 | IPI00117350.1 | 50634 | AVFVDLEPTVIDEIRNGPYR     | 768.7404  | 3 | 16  | b6    | 27.2 | 43.2  |
| 1611 | IPI00117350.1 | 50634 | AVFVDLEPTVIDEIRNGPYR     | 768.7405  | 3 | 18  |       | 0.0  | 18.0  |
| 1612 | IPI00117350.1 | 50634 | DVNAAIAAIK               | 493.2874  | 2 | 63  | y6    | 69.8 | 132.8 |
| 1613 | IPI00117350.1 | 50634 | EIIDPVLDLDR              | 535.2983  | 2 | 23  |       | 0.0  | 23.0  |
| 1614 | IPI00122565.1 | 51018 | KFDLGGQDVIDFTGHSLALYR    | 766.0675  | 3 | 55  | y6    | 14.6 | 69.6  |
| 1615 | IPI00122565.1 | 51018 | KFDLGGQDVIDFTGHSLALYR    | 766.0648  | 3 | 57  | y++17 | 36.9 | 93.9  |
| 1616 | IPI00122565.1 | 51018 | LPGQPPASMR               | 555.7902  | 2 | 37  | P y7  | 57.1 | 94.1  |
| 1617 | IPI00122565.1 | 51018 | LSAIYGGTYMLNKPIEEIVQNGK  | 884.8081  | 3 | 41  |       | 0.0  | 41.0  |
| 1618 | IPI00122565.1 | 51018 | LSAIYGGTYMLNKPIEEIVQNGK  | 884.8120  | 3 | 48  | y6    | 15.6 | 63.6  |
| 1619 | IPI00122565.1 | 51018 | LYSESLAR                 | 469.7514  | 2 | 27  | y6    | 35.8 | 62.8  |
| 1620 | IPI00122565.1 | 51018 | SPYLYPLYGLGELPQGFAR      | 1071.5600 | 2 | 69  | P y6  | 13.7 | 82.7  |
| 1621 | IPI00122565.1 | 51018 | VLHMDQNPYYGGESASITPLEDLK | 947.7877  | 3 | 26  | P y7  | 61.4 | 87.4  |
| 1622 | IPI00122565.1 | 51018 | VPSTEAEALASSLMGLFEK      | 660.6715  | 3 | 45  |       | 0.0  | 45.0  |
| 1623 | IPI00122565.1 | 51018 | VPSTEAEALASSLMGLFEK      | 990.5018  | 2 | 105 | y8    | 32.0 | 137.0 |
| 1624 | IPI00272431.2 | 29159 | LTGMAFR                  | 398.2128  | 2 | 27  | y5    | 69.8 | 96.8  |
| 1625 | IPI00272431.2 | 29159 | VIHDNFGIVEGLMAMVHAITATQK | 866.1255  | 3 | 41  | y7    | 23.8 | 64.8  |
| 1626 | IPI00118625.1 | 72897 | DIITTELNSATDNPVMFASR     | 1098.5391 | 2 | 50  | P y7  | 33.8 | 83.8  |
| 1627 | IPI00118625.1 | 72897 | DIITTELNSATDNPVMFASR     | 1098.5386 | 2 | 60  | P y7  | 33.8 | 93.8  |
| 1628 | IPI00118625.1 | 72897 | DRFMADIEAAHR             | 510.2488  | 3 | 47  | c b7  | 46.8 | 93.8  |
| 1629 | IPI00118625.1 | 72897 | GQIEVAFR                 | 460.2537  | 2 | 38  | y6    | 35.8 | 73.8  |
| 1630 | IPI00118625.1 | 72897 | LLLDQK                   | 365.2289  | 2 | 32  | y4    | 44.5 | 76.5  |
| 1631 | IPI00118625.1 | 72897 | LQELQVNLVR               | 606.3596  | 2 | 49  | y8    | 21.2 | 70.2  |
| 1632 | IPI00118625.1 | 72897 | LTVGWLGR                 | 451.2668  | 2 | 37  | y6    | 44.5 | 81.5  |
| 1633 | IPI00118625.1 | 72897 | SHSSGVGKPLSPER           | 479.9200  | 3 | 29  | P y6  | 5.9  | 34.9  |
| 1634 | IPI00118625.1 | 72897 | SHSSGVGKPLSPER           | 719.3760  | 2 | 63  | P y6  | 25.4 | 88.4  |
| 1635 | IPI00118625.1 | 72897 | SLLDSHHPSEIAESHR         | 483.2317  | 4 | 16  |       | 0.0  | 16.0  |
| 1636 | IPI00118625.1 | 72897 | SLLDSHHPSEIAESHR         | 643.9721  | 3 | 36  | y++14 | 9.3  | 45.3  |
| 1637 | IPI00118625.1 | 72897 | YIALDGDSLSTEDLVNLGK      | 1012.5148 | 2 | 61  | c b9  | 11.6 | 72.6  |



|      |               |       |                                 |           |   |    |      |      |       |
|------|---------------|-------|---------------------------------|-----------|---|----|------|------|-------|
| 1638 | IPI00118625.1 | 72897 | YIALDGDSLSTEDLVNLGK             | 1012.5148 | 2 | 79 | y9   | 42.2 | 121.2 |
| 1639 | gij1346343    | 66149 | DVDGAYMTK                       | 500.2267  | 2 | 20 | y7   | 65.2 | 85.2  |
| 1640 | gij1346343    | 66149 | FLEQQNQVLQTK                    | 738.4012  | 2 | 40 |      | 0.0  | 40.0  |
| 1641 | gij1346343    | 66149 | IEISELNR                        | 487.2689  | 2 | 40 | y6   | 25.4 | 65.4  |
| 1642 | gij1346343    | 66149 | LLRDYQELMNTK                    | 508.6010  | 3 | 16 | y4   | 41.0 | 57.0  |
| 1643 | gij1346343    | 66149 | LNDLEDALQQAK                    | 679.3571  | 2 | 76 | y7   | 49.6 | 125.6 |
| 1644 | gij1346343    | 66149 | LRSEIDNVK                       | 537.3020  | 2 | 34 | c b6 | 53.0 | 87.0  |
| 1645 | gij1346343    | 66149 | NMQDMVEDYRNKYEDEINK             | 812.3599  | 3 | 21 | y4   | 18.5 | 39.5  |
| 1646 | gij1346343    | 66149 | QISNLQQSISDAEQRGENALK           | 777.3978  | 3 | 15 |      | 0.0  | 15.0  |
| 1647 | gij1346343    | 66149 | QISNLQQSISDAEQRGENALK           | 777.3975  | 3 | 34 |      | 0.0  | 34.0  |
| 1648 | gij1346343    | 66149 | SKAEAESLYQSK                    | 670.8397  | 2 | 52 | y6   | 38.2 | 90.2  |
| 1649 | gij1346343    | 66149 | SLDLDSIIAEVK                    | 651.8608  | 2 | 87 | y8   | 58.1 | 145.1 |
| 1650 | gij1346343    | 66149 | SLNNQFASFIDK                    | 692.3491  | 2 | 58 | y5   | 53.0 | 111.0 |
| 1651 | gij1346343    | 66149 | THNLEPYFESFINNLR                | 665.3297  | 3 | 39 | y4   | 41.0 | 80.0  |
| 1652 | gij1346343    | 66149 | TLLEGEESR                       | 517.2619  | 2 | 38 | y5   | 38.2 | 76.2  |
| 1653 | gij1346343    | 66149 | TNAENEFVTIKK                    | 697.3714  | 2 | 36 | y8   | 44.3 | 80.3  |
| 1654 | gij1346343    | 66149 | WELLQQVDTSTR                    | 738.3787  | 2 | 49 | y8   | 23.8 | 72.8  |
| 1655 | gij1346343    | 66149 | YEELQITAGR                      | 590.3041  | 2 | 70 | y8   | 44.3 | 114.3 |
| 1656 | IPI00131828.1 | 46145 | DQSPASHEIATNLGDFAISLYR          | 802.7315  | 3 | 35 |      | 0.0  | 35.0  |
| 1657 | IPI00131828.1 | 46145 | DQSPASHEIATNLGDFAISLYR          | 802.7314  | 3 | 38 | y4   | 15.6 | 53.6  |
| 1658 | IPI00131828.1 | 46145 | FLEEAK                          | 736.3887  | 1 | 23 | c b4 | 62.3 | 85.3  |
| 1659 | IPI00131828.1 | 46145 | FLEEAK                          | 368.6976  | 2 | 28 | y5   | 53.0 | 81.0  |
| 1660 | IPI00131828.1 | 46145 | IFNNGADLSGITEENAPLK             | 1002.5085 | 2 | 84 | y8   | 58.1 | 142.1 |
| 1661 | IPI00131828.1 | 46145 | KLDQDTV FALANYILFK              | 667.3687  | 3 | 21 |      | 0.0  | 21.0  |
| 1662 | IPI00131828.1 | 46145 | KLDQDTV FALANYILFK              | 667.0343  | 3 | 23 | y7   | 12.9 | 35.9  |
| 1663 | IPI00131828.1 | 46145 | KLDQDTV FALANYILFK              | 1000.5517 | 2 | 63 | y8   | 32.0 | 95.0  |
| 1664 | IPI00131828.1 | 46145 | KLDQDTV FALANYILFK              | 1000.5480 | 2 | 82 | c b7 | 16.9 | 98.9  |
| 1665 | IPI00131828.1 | 46145 | KVINDFVEK                       | 546.3091  | 2 | 42 | y7   | 22.4 | 64.4  |
| 1666 | IPI00131828.1 | 46145 | LSQAVHK                         | 391.7297  | 2 | 20 | y5   | 44.5 | 64.5  |
| 1667 | IPI00131828.1 | 46145 | MQHLEQTLISK                     | 607.8136  | 2 | 50 | y7   | 65.2 | 115.2 |
| 1668 | IPI00131828.1 | 46145 | RLAQIHFPFR                      | 379.8929  | 3 | 42 | c b5 | 9.6  | 51.6  |
| 1669 | IPI00131828.1 | 46145 | SFQHLLQTLNRPDSELQLSTGNGLFVNNDLK | 875.7061  | 4 | 15 | y5   | 53.0 | 68.0  |
| 1670 | IPI00131828.1 | 46145 | SFQHLLQTLNRPDSELQLSTGNGLFVNNDLK | 875.9571  | 4 | 17 | y7   | 35.8 | 52.8  |
| 1671 | IPI00131828.1 | 46145 | TLMSPLGITR                      | 544.8109  | 2 | 44 | y7   | 49.6 | 93.6  |
| 1672 | IPI00131828.1 | 46145 | VINDFVEK                        | 482.2605  | 2 | 25 | y6   | 89.0 | 114.0 |
| 1673 | IPI00131828.1 | 46145 | VVDPTHK                         | 398.2222  | 2 | 23 | y5   | 25.4 | 48.4  |
| 1674 | IPI00126940.1 | 40466 | AGHYAASVIIR                     | 386.5522  | 3 | 42 | c b5 | 1.1  | 43.1  |
| 1675 | IPI00126940.1 | 40466 | AGHYAASVIIR                     | 579.3255  | 2 | 67 | y7   | 5.9  | 72.9  |
| 1676 | IPI00126940.1 | 40466 | ELFDELVK                        | 496.7687  | 2 | 24 | y5   | 53.0 | 77.0  |
| 1677 | IPI00126940.1 | 40466 | FGEILK                          | 706.4177  | 1 | 31 | c b4 | 41.0 | 72.0  |
| 1678 | IPI00126940.1 | 40466 | FGEILK                          | 353.7105  | 2 | 48 | y4   | 44.5 | 92.5  |

|      |               |       |                               |           |   |    |         |      |       |
|------|---------------|-------|-------------------------------|-----------|---|----|---------|------|-------|
| 1679 | IPI00126940.1 | 40466 | KAQALPK                       | 378.2424  | 2 | 33 | c b5    | 25.4 | 58.4  |
| 1680 | IPI00126940.1 | 40466 | LKVEAPQALSENVLFMGNPLLDISAVVDK | 1056.9103 | 3 | 54 | y6      | 41.0 | 95.0  |
| 1681 | IPI00126940.1 | 40466 | VAQWLIQEPHK                   | 450.2513  | 3 | 25 |         | 0.0  | 25.0  |
| 1682 | IPI00126940.1 | 40466 | VAQWLIQEPHK                   | 674.8774  | 2 | 52 | y6      | 49.6 | 101.6 |
| 1683 | IPI00126940.1 | 40466 | VEAPQALSENVLFMGNPLLDISAVVDK   | 976.5131  | 3 | 37 |         | 0.0  | 37.0  |
| 1684 | IPI00126940.1 | 40466 | VEAPQALSENVLFMGNPLLDISAVVDK   | 976.5134  | 3 | 42 | b7      | 5.6  | 47.6  |
| 1685 | IPI00126940.1 | 40466 | VEYHAGGSTQNSMK                | 503.5655  | 3 | 27 | y5      | 25.4 | 52.4  |
| 1686 | IPI00126940.1 | 40466 | VEYHAGGSTQNSMK                | 754.8436  | 2 | 42 | y9      | 29.0 | 71.0  |
| 1687 | IPI00126940.1 | 40466 | VFTLNLSAPPFISQFFK             | 620.3410  | 3 | 35 | y5      | 62.3 | 97.3  |
| 1688 | IPI00126940.1 | 40466 | VFTLNLSAPPFISQFFK             | 930.5124  | 2 | 39 | y5      | 57.1 | 96.1  |
| 1689 | IPI00126940.1 | 40466 | VFTLNLSAPPFISQFFK             | 930.5127  | 2 | 67 |         | 0.0  | 67.0  |
| 1690 | IPI00126940.1 | 40466 | YSLKPNDQILAEDK                | 545.2862  | 3 | 47 | y5      | 83.9 | 130.9 |
| 1691 | IPI00134746.2 | 52016 | APNSPDVLEIEFFK                | 529.6198  | 3 | 32 | P y++10 | 61.4 | 93.4  |
| 1692 | IPI00134746.2 | 52016 | EFVEEFIWPAVQSSALYEDR          | 806.0560  | 3 | 19 | b7      | 35.8 | 54.8  |
| 1693 | IPI00134746.2 | 52016 | EQGYDVIAYLANIGQK              | 891.9565  | 2 | 37 | y9      | 50.5 | 87.5  |
| 1694 | IPI00134746.2 | 52016 | EQGYDVIAYLANIGQK              | 594.6405  | 3 | 45 | y6      | 65.2 | 110.2 |
| 1695 | IPI00134746.2 | 52016 | EQGYDVIAYLANIGQK              | 891.9573  | 2 | 67 | y8      | 44.3 | 111.3 |
| 1696 | IPI00134746.2 | 52016 | GQVYILGR                      | 453.2643  | 2 | 26 | y6      | 46.8 | 72.8  |
| 1697 | IPI00134746.2 | 52016 | GRNDLMEYAK                    | 598.7907  | 2 | 35 | c b7    | 35.8 | 70.8  |
| 1698 | IPI00134746.2 | 52016 | GRNDLMEYAK                    | 399.5294  | 3 | 35 | y5      | 69.8 | 104.8 |
| 1699 | IPI00134746.2 | 52016 | IDIVENR                       | 429.7381  | 2 | 44 | y4      | 29.5 | 73.5  |
| 1700 | IPI00134746.2 | 52016 | KVFIEDVSK                     | 532.8033  | 2 | 27 | y7      | 61.4 | 88.4  |
| 1701 | IPI00134746.2 | 52016 | KVFIEDVSK                     | 355.5376  | 3 | 29 | c b4    | 16.9 | 45.9  |
| 1702 | IPI00134746.2 | 52016 | MPEFYNR                       | 478.7188  | 2 | 34 | P y6    | 53.0 | 87.0  |
| 1703 | IPI00134746.2 | 52016 | NQAPPLYTK                     | 544.7910  | 2 | 37 | P y7    | 69.8 | 106.8 |
| 1704 | IPI00134746.2 | 52016 | QGLGLK                        | 308.1948  | 2 | 28 |         | 0.0  | 28.0  |
| 1705 | IPI00134746.2 | 52016 | RQVEIAQR                      | 500.2889  | 2 | 59 | b4      | 29.5 | 88.5  |
| 1706 | IPI00134746.2 | 52016 | SPWSMDENLMHISYEAGILENPK       | 888.0831  | 3 | 25 | y7      | 46.8 | 71.8  |
| 1707 | IPI00134746.2 | 52016 | SPWSMDENLMHISYEAGILENPK       | 888.0837  | 3 | 36 | y7      | 61.4 | 97.4  |
| 1708 | IPI00134746.2 | 52016 | VFIEDVSK                      | 468.7562  | 2 | 27 | y6      | 95.7 | 122.7 |
| 1709 | IPI00134746.2 | 52016 | VIAPWR                        | 371.2242  | 2 | 24 |         | 0.0  | 24.0  |
| 1710 | IPI00134746.2 | 52016 | VQVSVFK                       | 403.7424  | 2 | 22 | y5      | 75.6 | 97.6  |
| 1711 | IPI00134746.2 | 52016 | VQVSVFK                       | 806.4850  | 1 | 26 | y4      | 57.1 | 83.1  |
| 1712 | IPI00123924.1 | 46140 | ELISQFLLNR                    | 616.8539  | 2 | 60 | y7      | 35.8 | 95.8  |
| 1713 | IPI00123924.1 | 46140 | IVEAVK                        | 329.7107  | 2 | 20 | y5      | 69.8 | 89.8  |
| 1714 | IPI00123924.1 | 46140 | MQHLEQTLNK                    | 414.5486  | 3 | 20 |         | 0.0  | 20.0  |
| 1715 | IPI00123924.1 | 46140 | MQHLEQTLNK                    | 621.3193  | 2 | 46 | y8      | 58.1 | 104.1 |
| 1716 | IPI00353727.3 | 36288 | GLGTDNTLIR                    | 587.8084  | 2 | 59 | y7      | 22.4 | 81.4  |
| 1717 | IPI00353727.3 | 36288 | SELSSNFEQVILGLMTPTVLYDVQELRR  | 1080.5668 | 3 | 76 | b7      | 0.6  | 76.6  |
| 1718 | IPI00353727.3 | 36288 | SELSSNFEQVILGLMTPTVLYDVQELRR  | 1080.2344 | 3 | 85 |         | 0.0  | 85.0  |
| 1719 | IPI00353727.3 | 36288 | SELSSNFEQVILGLMTPTVLYDVQELRR  | 1080.5679 | 3 | 89 | y6      | 8.5  | 97.5  |

|      |               |        |                          |           |   |    |       |       |       |
|------|---------------|--------|--------------------------|-----------|---|----|-------|-------|-------|
| 1720 | IPI00130589.2 | 16104  | DGVANVSIEDR              | 587.7882  | 2 | 50 | y5    | 14.6  | 64.6  |
| 1721 | IPI00130589.2 | 16104  | DGVANVSIEDR              | 587.7882  | 2 | 58 | y5    | 27.2  | 85.2  |
| 1722 | IPI00130589.2 | 16104  | DGVANVSIEDRVISLSGEHSIIGR | 842.1067  | 3 | 36 | y8    | 25.4  | 61.4  |
| 1723 | IPI00130589.2 | 16104  | DGVANVSIEDRVISLSGEHSIIGR | 842.1128  | 3 | 42 | y9    | 42.2  | 84.2  |
| 1724 | IPI00130589.2 | 16104  | GDGPVQGTIHFEQK           | 504.9198  | 3 | 21 |       | 0.0   | 21.0  |
| 1725 | IPI00130589.2 | 16104  | GDGPVQGTIHFEQK           | 756.8855  | 2 | 48 | y8    | 58.1  | 106.1 |
| 1726 | IPI00130589.2 | 16104  | GDGPVQGTIHFEQK           | 756.8855  | 2 | 52 | y5    | 53.0  | 105.0 |
| 1727 | IPI00130589.2 | 16104  | HGGPADEERHVGDLGNVTAGK    | 530.0099  | 4 | 21 |       | 0.0   | 21.0  |
| 1728 | IPI00130589.2 | 16104  | HGGPADEERHVGDLGNVTAGK    | 706.3479  | 3 | 25 | y++15 | 29.5  | 54.5  |
| 1729 | IPI00130589.2 | 16104  | HGGPADEERHVGDLGNVTAGK    | 706.0187  | 3 | 26 | y10   | 29.0  | 55.0  |
| 1730 | IPI00130589.2 | 16104  | HGGPADEERHVGDLGNVTAGK    | 529.7595  | 4 | 32 |       | 0.0   | 32.0  |
| 1731 | IPI00130589.2 | 16104  | HVGDLGNVTAGK             | 584.3092  | 2 | 38 | y10   | 36.9  | 74.9  |
| 1732 | IPI00130589.2 | 16104  | HVGDLGNVTAGK             | 389.8755  | 3 | 47 | c b7  | 33.8  | 80.8  |
| 1733 | IPI00130589.2 | 16104  | KHGGPADEER               | 365.8441  | 3 | 55 | y4    | 27.2  | 82.2  |
| 1734 | IPI00130589.2 | 16104  | KHGGPADEERHVGDLGNVTAGK   | 748.7110  | 3 | 15 | y8    | 32.0  | 47.0  |
| 1735 | IPI00130589.2 | 16104  | TMVVHEK                  | 843.4511  | 1 | 21 | b6    | 49.6  | 70.6  |
| 1736 | IPI00130589.2 | 16104  | TMVVHEK                  | 422.2237  | 2 | 37 | y4    | 29.5  | 66.5  |
| 1737 | IPI00130589.2 | 16104  | VISLSGEHSIIGR            | 456.5933  | 3 | 21 | y++11 | 102.9 | 123.9 |
| 1738 | IPI00130589.2 | 16104  | VISLSGEHSIIGR            | 684.3884  | 2 | 56 | y9    | 44.3  | 100.3 |
| 1739 | IPI00126248.1 | 120564 | AFDSGIIPEFVNK            | 784.3948  | 2 | 66 | P y7  | 95.7  | 161.7 |
| 1740 | IPI00126248.1 | 120564 | AFDSGIIPEFVNK            | 784.3949  | 2 | 70 | P y7  | 95.7  | 165.7 |
| 1741 | IPI00126248.1 | 120564 | EILIPVFK                 | 479.8027  | 2 | 19 |       | 0.0   | 19.0  |
| 1742 | IPI00126248.1 | 120564 | IGNTGGMLDNILASK          | 752.8954  | 2 | 50 |       | 0.0   | 50.0  |
| 1743 | IPI00126248.1 | 120564 | LGLVGVNLSLDGVK           | 692.4134  | 2 | 57 | y8    | 21.2  | 78.2  |
| 1744 | IPI00126248.1 | 120564 | SFDELGEIISVYEDLVAK       | 1078.5423 | 2 | 76 | c b8  | 5.4   | 81.4  |
| 1745 | IPI00126248.1 | 120564 | SFDELGEIISVYEDLVAK       | 1078.5425 | 2 | 78 |       | 0.0   | 78.0  |
| 1746 | IPI00230034.3 | 13183  | FFPLEAWQIGK              | 668.3627  | 2 | 28 | y5    | 57.1  | 85.1  |
| 1747 | IPI00230034.3 | 13183  | FFPLEAWQIGK              | 668.3627  | 2 | 45 | y7    | 23.8  | 68.8  |
| 1748 | IPI00230034.3 | 13183  | FFPLEAWQIGK              | 668.3578  | 2 | 53 | y5    | 38.2  | 91.2  |
| 1749 | IPI00230034.3 | 13183  | FLTEELSLDQDR             | 733.3602  | 2 | 44 |       | 0.0   | 44.0  |
| 1750 | IPI00230034.3 | 13183  | FLTEELSLDQDR             | 733.3601  | 2 | 46 | y4    | 41.0  | 87.0  |
| 1751 | IPI00230034.3 | 13183  | FLTEELSLDQDRIVIR         | 974.5310  | 2 | 19 | y7    | 25.4  | 44.4  |
| 1752 | IPI00230034.3 | 13183  | FLTEELSLDQDRIVIR         | 974.5306  | 2 | 20 | y7    | 44.5  | 64.5  |
| 1753 | IPI00230034.3 | 13183  | FLTEELSLDQDRIVIR         | 649.6900  | 3 | 22 | y++13 | 27.7  | 49.7  |
| 1754 | IPI00230034.3 | 13183  | FLTEELSLDQDRIVIR         | 649.6948  | 3 | 53 |       | 0.0   | 53.0  |
| 1755 | IPI00230034.3 | 13183  | GTVMTFL                  | 768.3967  | 1 | 23 | b6    | 15.6  | 38.6  |
| 1756 | IPI00230034.3 | 13183  | IPAGLENR                 | 435.2457  | 2 | 50 | y5    | 16.9  | 66.9  |
| 1757 | IPI00230034.3 | 13183  | IPAGLENR                 | 435.2457  | 2 | 51 | y6    | 25.4  | 76.4  |
| 1758 | IPI00230034.3 | 13183  | KGTVMFTL                 | 448.7493  | 2 | 39 | b6    | 15.6  | 54.6  |
| 1759 | IPI00230034.3 | 13183  | VSVTIRPGMTLLMNK          | 554.3157  | 3 | 16 |       | 0.0   | 16.0  |
| 1760 | IPI00230034.3 | 13183  | VSVTIRPGMTLLMNK          | 553.9810  | 3 | 20 |       | 0.0   | 20.0  |

|      |               |        |                                 |           |   |    |       |      |       |
|------|---------------|--------|---------------------------------|-----------|---|----|-------|------|-------|
| 1761 | IPI00122862.2 | 101820 | ASQAPSSFQLLYDLK                 | 834.9364  | 2 | 43 |       | 0.0  | 43.0  |
| 1762 | IPI00122862.2 | 101820 | ASQAPSSFQLLYDLK                 | 834.9363  | 2 | 45 | y4    | 32.3 | 77.3  |
| 1763 | IPI00122862.2 | 101820 | ERASFITPVPGGVGPMTVAMLMQSTVESAQ  | 1083.5470 | 3 | 44 | y4    | 8.5  | 52.5  |
| 1764 | IPI00122862.2 | 101820 | ERASFITPVPGGVGPMTVAMLMQSTVESAQ  | 1083.5477 | 3 | 51 | y4    | 29.5 | 80.5  |
| 1765 | IPI00122862.2 | 101820 | FSDIQIR                         | 439.7401  | 2 | 19 | y5    | 75.6 | 94.6  |
| 1766 | IPI00122862.2 | 101820 | IFHELTQTDK                      | 411.2157  | 3 | 17 | y++9  | 23.8 | 40.8  |
| 1767 | IPI00122862.2 | 101820 | IFHELTQTDK                      | 616.3196  | 2 | 31 | y7    | 23.8 | 54.8  |
| 1768 | IPI00122862.2 | 101820 | IYGADDIELLPEAQNK                | 894.9544  | 2 | 67 | P y6  | 77.6 | 144.6 |
| 1769 | IPI00122862.2 | 101820 | LIGNLAR                         | 378.7398  | 2 | 25 | y5    | 38.2 | 63.2  |
| 1770 | IPI00122862.2 | 101820 | MFGVPPVVAVNVFK                  | 753.9332  | 2 | 43 |       | 0.0  | 43.0  |
| 1771 | IPI00122862.2 | 101820 | THLSLSHNPEQK                    | 464.2408  | 3 | 23 | P y4  | 20.6 | 43.6  |
| 1772 | IPI00122862.2 | 101820 | TPVPSDIAISR                     | 578.3227  | 2 | 55 | P y8  | 69.8 | 124.8 |
| 1773 | IPI00122862.2 | 101820 | VVGDVAYDEAK                     | 583.2908  | 2 | 50 | y9    | 81.7 | 131.7 |
| 1774 | IPI00122862.2 | 101820 | YVVVTGITPTPLGEGK                | 815.9573  | 2 | 71 | P y8  | 21.2 | 92.2  |
| 1775 | IPI00230707.4 | 28456  | AYSEAHEISK                      | 567.7754  | 2 | 59 | y8    | 58.1 | 117.1 |
| 1776 | IPI00230707.4 | 28456  | DSTLIMQLLR                      | 595.3350  | 2 | 47 | y5    | 25.4 | 72.4  |
| 1777 | IPI00230707.4 | 28456  | DSTLIMQLLR                      | 595.3350  | 2 | 48 | y5    | 41.0 | 89.0  |
| 1778 | IPI00230707.4 | 28456  | LAEQAERYDDMAAMK                 | 604.9482  | 3 | 40 | y5    | 38.2 | 78.2  |
| 1779 | IPI00230707.4 | 28456  | NLLSVAYK                        | 454.2662  | 2 | 22 | y5    | 75.6 | 97.6  |
| 1780 | IPI00230707.4 | 28456  | TAFDDAIAELDTLNEDSYK             | 1066.4920 | 2 | 67 | y6    | 82.7 | 149.7 |
| 1781 | IPI00230707.4 | 28456  | TAFDDAIAELDTLNEDSYK             | 1066.4918 | 2 | 75 | y6    | 53.0 | 128.0 |
| 1782 | IPI00230707.4 | 28456  | TAFDDAIAELDTLNEDSYKDSTLIMQLLR   | 1101.8817 | 3 | 62 | y6    | 13.7 | 75.7  |
| 1783 | IPI00230707.4 | 28456  | VDREQLVQK                       | 578.8198  | 2 | 28 |       | 0.0  | 28.0  |
| 1784 | IPI00230707.4 | 28456  | VISSIEQK                        | 452.2611  | 2 | 30 | y6    | 53.0 | 83.0  |
| 1785 | IPI00230707.4 | 28456  | YLAEVATGEK                      | 540.7825  | 2 | 49 | y7    | 46.8 | 95.8  |
| 1786 | IPI00122344.1 | 44166  | AVAALDGAK                       | 408.2349  | 2 | 30 | y7    | 33.8 | 63.8  |
| 1787 | IPI00122344.1 | 44166  | AVVLPISLATTFFKQDFPGQSSGFEYSR    | 983.1737  | 3 | 42 | y7    | 12.9 | 54.9  |
| 1788 | IPI00122344.1 | 44166  | AVVLPISLATTFFKQDFPGQSSGFEYSR    | 982.8394  | 3 | 45 | y++12 | 19.2 | 64.2  |
| 1789 | IPI00122344.1 | 44166  | DASLSGFLPSFQHFATQAIHVGQEPEQWNSR | 1162.8999 | 3 | 32 | P y7  | 38.2 | 70.2  |
| 1790 | IPI00122344.1 | 44166  | DASLSGFLPSFQHFATQAIHVGQEPEQWNSR | 1162.9001 | 3 | 34 |       | 0.0  | 34.0  |
| 1791 | IPI00122344.1 | 44166  | DRATLGINDTLIR                   | 486.6078  | 3 | 35 | c b7  | 7.7  | 42.7  |
| 1792 | IPI00122344.1 | 44166  | FLETNPR                         | 438.7324  | 2 | 43 | y5    | 38.2 | 81.2  |
| 1793 | IPI00122344.1 | 44166  | GALQHAK                         | 362.7088  | 2 | 24 | y5    | 38.2 | 62.2  |
| 1794 | IPI00122344.1 | 44166  | LLEAAITPQTK                     | 592.8483  | 2 | 57 | P y4  | 62.3 | 119.3 |
| 1795 | IPI00122344.1 | 44166  | LSVGLEDEQDLLEDLDR               | 979.9807  | 2 | 44 | y6    | 27.2 | 71.2  |
| 1796 | IPI00122344.1 | 44166  | LSVGLEDEQDLLEDLDR               | 980.4813  | 2 | 46 | y5    | 25.4 | 71.4  |
| 1797 | IPI00122344.1 | 44166  | LSVGLEDEQDLLEDLDR               | 980.4812  | 2 | 52 | y5    | 25.4 | 77.4  |
| 1798 | IPI00122344.1 | 44166  | LVWIETPTNPTLK                   | 756.4278  | 2 | 27 | P y7  | 33.8 | 60.8  |
| 1799 | IPI00122344.1 | 44166  | QDFPGQSSGFEYSR                  | 803.3535  | 2 | 61 | y7    | 33.8 | 94.8  |
| 1800 | IPI00122344.1 | 44166  | RVASEFGLK                       | 503.7875  | 2 | 31 | b5    | 25.4 | 56.4  |
| 1801 | IPI00122344.1 | 44166  | VASEFGLK                        | 425.7371  | 2 | 20 | y6    | 49.6 | 69.6  |

|      |               |       |                             |           |   |    |         |      |       |
|------|---------------|-------|-----------------------------|-----------|---|----|---------|------|-------|
| 1802 | IPI00331436.1 | 56549 | ANKPGDVVR                   | 478.2695  | 2 | 26 | P y6    | 69.8 | 95.8  |
| 1803 | IPI00331436.1 | 56549 | ANKPGDVVR                   | 319.1824  | 3 | 30 | P y6    | 14.6 | 44.6  |
| 1804 | IPI00331436.1 | 56549 | ASANMDLMR                   | 504.7344  | 2 | 46 | y7      | 22.4 | 68.4  |
| 1805 | IPI00331436.1 | 56549 | EFVTHTK                     | 431.2271  | 2 | 22 | y5      | 32.3 | 54.3  |
| 1806 | IPI00331436.1 | 56549 | GITFDSSGGISIK               | 597.8218  | 2 | 55 | y8      | 42.2 | 97.2  |
| 1807 | IPI00331436.1 | 56549 | GMSGRPTR                    | 431.2216  | 2 | 16 |         | 0.0  | 16.0  |
| 1808 | IPI00331436.1 | 56549 | GSEPPVFLEIHMGSPNATEAPLVFVGK | 1039.5240 | 3 | 23 | P y7    | 49.6 | 72.6  |
| 1809 | IPI00331436.1 | 56549 | GSEPPVFLEIHMGSPNATEAPLVFVGK | 1039.5191 | 3 | 32 |         | 0.0  | 32.0  |
| 1810 | IPI00331436.1 | 56549 | GSEPPVFLEIHMGSPNATEAPLVFVGK | 1039.5242 | 3 | 36 | P y++13 | 27.7 | 63.7  |
| 1811 | IPI00331436.1 | 56549 | GVLFGSQNLAR                 | 616.8405  | 2 | 65 | y7      | 22.4 | 87.4  |
| 1812 | IPI00331436.1 | 56549 | HLMESPANEMTPTR              | 538.5855  | 3 | 23 | y4      | 41.0 | 64.0  |
| 1813 | IPI00331436.1 | 56549 | LREMLNISGPPLK               | 489.9503  | 3 | 20 | y6      | 38.2 | 58.2  |
| 1814 | IPI00331436.1 | 56549 | MPLFEHYTR                   | 597.2917  | 2 | 33 | y6      | 38.2 | 71.2  |
| 1815 | IPI00331436.1 | 56549 | SWIEEQEMGSFLSVAK            | 921.4438  | 2 | 52 | y8      | 5.4  | 57.4  |
| 1816 | IPI00331436.1 | 56549 | SWIEEQEMGSFLSVAK            | 921.4440  | 2 | 80 | y4      | 57.1 | 137.1 |
| 1817 | IPI00331436.1 | 56549 | TIQVDNTDAEGR                | 659.8157  | 2 | 60 | y9      | 29.0 | 89.0  |
| 1818 | IPI00331436.1 | 56549 | TLIEFLLR                    | 502.8138  | 2 | 31 | y6      | 82.7 | 113.7 |
| 1819 | IPI00400148.1 | 26734 | GISEETTTGVHNLK              | 550.2779  | 3 | 18 | y++10   | 23.8 | 41.8  |
| 1820 | IPI00400148.1 | 26734 | VNIKPQVDR                   | 534.8125  | 2 | 27 | P y5    | 69.8 | 96.8  |
| 1821 | IPI00400148.1 | 26734 | VPAINVNDSVTK                | 628.8463  | 2 | 52 | y6      | 65.2 | 117.2 |
| 1822 | IPI00400148.1 | 26734 | VPAINVNDSVTK                | 629.3380  | 2 | 63 |         | 0.0  | 63.0  |
| 1823 | IPI00400148.1 | 26734 | VPAINVNDSVTK                | 628.8463  | 2 | 64 | y8      | 58.1 | 122.1 |
| 1824 | IPI00338855.1 | 25913 | FNLGLDFPNLPYLIDGSHK         | 721.0447  | 3 | 27 |         | 0.0  | 27.0  |
| 1825 | IPI00338855.1 | 25913 | GLTHSIR                     | 392.2270  | 2 | 23 | y5      | 25.4 | 48.4  |
| 1826 | IPI00338855.1 | 25913 | PMTLGYWNR                   | 619.8030  | 2 | 44 | y6      | 1.4  | 45.4  |
| 1827 | IPI00338855.1 | 25913 | RPWFAGDK                    | 488.7536  | 2 | 40 | c b7    | 6.6  | 46.6  |
| 1828 | IPI00338855.1 | 25913 | VTQSNAILR                   | 501.2905  | 2 | 52 | y7      | 13.7 | 65.7  |
| 1829 | IPI00338855.1 | 25913 | VTYVDFLAYDILDQYR            | 998.0035  | 2 | 28 | y4      | 44.5 | 72.5  |
| 1830 | IPI00128434.1 | 45254 | AFEEEEQALR                  | 546.7694  | 2 | 50 | y6      | 13.7 | 63.7  |
| 1831 | IPI00128434.1 | 45254 | EMGDHLVK                    | 464.7320  | 2 | 16 |         | 0.0  | 16.0  |
| 1832 | IPI00128434.1 | 45254 | EVVSHVIK                    | 455.7715  | 2 | 17 |         | 0.0  | 17.0  |
| 1833 | IPI00128434.1 | 45254 | FAVLQTYGDTTHTLVEK           | 641.6680  | 3 | 24 | y++10   | 6.6  | 30.6  |
| 1834 | IPI00128434.1 | 45254 | HNHQGFAGNFNSLKF             | 592.2850  | 3 | 52 |         | 0.0  | 52.0  |
| 1835 | IPI00128434.1 | 45254 | HNHQGFAGNFNSLKF             | 888.4270  | 2 | 59 | c b4    | 8.5  | 67.5  |
| 1836 | IPI00128434.1 | 45254 | IVREPWVEQDK                 | 466.9174  | 3 | 16 | y5      | 25.4 | 41.4  |
| 1837 | IPI00128434.1 | 45254 | IVREPWVEQDK                 | 699.8783  | 2 | 34 |         | 0.0  | 34.0  |
| 1838 | IPI00128434.1 | 45254 | MGFEPLAYR                   | 542.2728  | 2 | 49 | P y5    | 82.7 | 131.7 |
| 1839 | IPI00128434.1 | 45254 | MPINEPAPGR                  | 541.2771  | 2 | 56 | P y5    | 14.6 | 70.6  |
| 1840 | IPI00128434.1 | 45254 | NLQFHR                      | 407.7196  | 2 | 23 |         | 0.0  | 23.0  |
| 1841 | IPI00128434.1 | 45254 | PMQDRPTLFLEVIQR             | 615.0015  | 3 | 49 | y5      | 16.9 | 65.9  |
| 1842 | IPI00128434.1 | 45254 | SIVVTNYEESIK                | 691.3659  | 2 | 69 | y7      | 95.7 | 164.7 |

|      |               |       |                                |           |   |    |        |       |       |
|------|---------------|-------|--------------------------------|-----------|---|----|--------|-------|-------|
| 1843 | IPI00128434.1 | 45254 | SQIQEYVDYNGGAGVQHIALK          | 764.3872  | 3 | 28 |        | 0.0   | 28.0  |
| 1844 | IPI00128434.1 | 45254 | TEDIITAIR                      | 516.2909  | 2 | 55 | y7     | 77.6  | 132.6 |
| 1845 | IPI00227822.4 | 36661 | ALEVLVAK                       | 421.7709  | 2 | 39 | y6     | 116.0 | 155.0 |
| 1846 | IPI00227822.4 | 36661 | ALGLSNFNSR                     | 539.7865  | 2 | 30 | y6     | 27.2  | 57.2  |
| 1847 | IPI00227822.4 | 36661 | AVPREELFVTSK                   | 688.3874  | 2 | 28 | c b8   | 46.8  | 74.8  |
| 1848 | IPI00227822.4 | 36661 | AWRHPDEPVLLEEPVVLALAEK         | 628.5953  | 4 | 37 | P y++9 | 75.6  | 112.6 |
| 1849 | IPI00227822.4 | 36661 | HALSAGYR                       | 437.7306  | 2 | 28 | y6     | 23.8  | 51.8  |
| 1850 | IPI00227822.4 | 36661 | HHPEDVEPALRK                   | 476.5847  | 3 | 20 | P y5   | 16.9  | 36.9  |
| 1851 | IPI00227822.4 | 36661 | ILQNIQVDFDFTFSPEEMK            | 1094.0525 | 2 | 18 |        | 0.0   | 18.0  |
| 1852 | IPI00227822.4 | 36661 | ILQNIQVDFDFTFSPEEMK            | 1094.0471 | 2 | 59 | y6     | 69.8  | 128.8 |
| 1853 | IPI00227822.4 | 36661 | ILQNIQVDFDFTFSPEEMK            | 1094.0468 | 2 | 70 | P y5   | 69.8  | 139.8 |
| 1854 | IPI00227822.4 | 36661 | MPLIGLGTWK                     | 558.3174  | 2 | 34 | y6     | 57.1  | 91.1  |
| 1855 | IPI00227822.4 | 36661 | QLDALNK                        | 401.2271  | 2 | 26 |        | 0.0   | 26.0  |
| 1856 | IPI00227822.4 | 36661 | SPAQILLR                       | 449.2796  | 2 | 60 |        | 0.0   | 60.0  |
| 1857 | IPI00227822.4 | 36661 | TASSVLLHTGQK                   | 642.3523  | 2 | 57 | y5     | 53.0  | 110.0 |
| 1858 | IPI00227822.4 | 36661 | TLADLQLEYLDLYLMHWPYAFER        | 967.8203  | 3 | 24 | P y6   | 14.6  | 38.6  |
| 1859 | IPI00227822.4 | 36661 | TLADLQLEYLDLYLMHWPYAFER        | 967.8204  | 3 | 30 |        | 0.0   | 30.0  |
| 1860 | IPI00330760.4 | 26907 | DLGATWVVLGHSER                 | 513.9358  | 3 | 20 | y++10  | 77.6  | 97.6  |
| 1861 | IPI00330760.4 | 26907 | DLGATWVVLGHSERR                | 565.9691  | 3 | 18 |        | 0.0   | 18.0  |
| 1862 | IPI00330760.4 | 26907 | ELASQPDVDGFLVGGASLKPEFVDIINAK  | 1010.8656 | 3 | 18 |        | 0.0   | 18.0  |
| 1863 | IPI00330760.4 | 26907 | ELASQPDVDGFLVGGASLKPEFVDIINAK  | 1010.8698 | 3 | 29 |        | 0.0   | 29.0  |
| 1864 | IPI00330760.4 | 26907 | ELASQPDVDGFLVGGASLKPEFVDIINAK  | 1011.1994 | 3 | 31 | b5 P   | 18.5  | 49.5  |
| 1865 | IPI00330760.4 | 26907 | ELASQPDVDGFLVGGASLKPEFVDIINAK  | 1011.1997 | 3 | 41 | b5 P   | 6.2   | 47.2  |
| 1866 | IPI00330760.4 | 26907 | ELASQPDVDGFLVGGASLKPEFVDIINAKQ | 1053.5531 | 3 | 31 |        | 0.0   | 31.0  |
| 1867 | IPI00330760.4 | 26907 | ELASQPDVDGFLVGGASLKPEFVDIINAKQ | 1053.5526 | 3 | 34 | b5 P   | 18.5  | 52.5  |
| 1868 | IPI00330760.4 | 26907 | FFVGGNWK                       | 477.7460  | 2 | 27 | y5     | 44.5  | 71.5  |
| 1869 | IPI00330760.4 | 26907 | HVFGESDELIGQK                  | 486.9123  | 3 | 39 | y4     | 15.6  | 54.6  |
| 1870 | IPI00330760.4 | 26907 | LDEREAGITEK                    | 630.8246  | 2 | 22 |        | 0.0   | 22.0  |
| 1871 | IPI00330760.4 | 26907 | LDEREAGITEK                    | 420.8864  | 3 | 26 | y5     | 32.3  | 58.3  |
| 1872 | IPI00330760.4 | 26907 | RHVFGESDELIGQK                 | 538.9461  | 3 | 63 | y4     | 49.1  | 112.1 |
| 1873 | IPI00330760.4 | 26907 | SNVNDGVAQSTR                   | 624.3032  | 2 | 61 | y5     | 35.8  | 96.8  |
| 1874 | IPI00330760.4 | 26907 | TATPQQAQEVHEK                  | 489.5796  | 3 | 16 |        | 0.0   | 16.0  |
| 1875 | IPI00330760.4 | 26907 | TATPQQAQEVHEK                  | 733.8650  | 2 | 35 | y++11  | 32.0  | 67.0  |
| 1876 | IPI00330760.4 | 26907 | VIADNVK                        | 758.4430  | 1 | 34 | y5     | 27.2  | 61.2  |
| 1877 | IPI00330760.4 | 26907 | VTNGAFTGEISPGMIK               | 811.4145  | 2 | 57 | P y5   | 49.1  | 106.1 |
| 1878 | IPI00330760.4 | 26907 | VVFEQTK                        | 425.7371  | 2 | 26 | y5     | 69.8  | 95.8  |
| 1879 | IPI00330760.4 | 26907 | VVLAYEPVWAIGTGK                | 534.9720  | 3 | 46 |        | 0.0   | 46.0  |
| 1880 | IPI00130640.1 | 18576 | AAYQVAALPR                     | 530.3008  | 2 | 31 | c b8   | 5.6   | 36.6  |
| 1881 | IPI00130640.1 | 18576 | AAYQVAALPR                     | 530.3008  | 2 | 51 | c b7   | 1.4   | 52.4  |
| 1882 | IPI00130640.1 | 18576 | GSRVEIEIAVQGPFIKA              | 629.3572  | 3 | 22 |        | 0.0   | 22.0  |
| 1883 | IPI00130640.1 | 18576 | TTVLLADMNDFGTVNEIYK            | 1073.0376 | 2 | 18 |        | 0.0   | 18.0  |

|      |               |       |                               |           |   |    |      |      |       |
|------|---------------|-------|-------------------------------|-----------|---|----|------|------|-------|
| 1884 | IPI00130640.1 | 18576 | TTVLLADMNDFGTVNEIYK           | 1073.0314 | 2 | 61 | y5   | 75.6 | 136.6 |
| 1885 | IPI00130640.1 | 18576 | TTVLLADMNDFGTVNEIYK           | 1073.0362 | 2 | 65 | y5   | 53.0 | 118.0 |
| 1886 | IPI00130640.1 | 18576 | TTVLLADMNDFGTVNEIYK           | 1073.0359 | 2 | 66 | y5   | 75.6 | 141.6 |
| 1887 | IPI00130640.1 | 18576 | TYFQGS LPAR                   | 570.2962  | 2 | 43 | y8   | 30.4 | 73.4  |
| 1888 | IPI00130640.1 | 18576 | VEIEAIAVQGPFIKA               | 792.9527  | 2 | 19 | y6   | 25.4 | 44.4  |
| 1889 | IPI00130640.1 | 18576 | VEIEAIAVQGPFIKA               | 793.4551  | 2 | 31 | P y5 | 97.9 | 128.9 |
| 1890 | IPI00321734.5 | 20997 | ATLELTHNWGTEDDETQSYHNGNSDPR   | 1030.1178 | 3 | 22 |      | 0.0  | 22.0  |
| 1891 | IPI00321734.5 | 20997 | DFLLQQTMLR                    | 632.8410  | 2 | 54 | y7   | 23.8 | 77.8  |
| 1892 | IPI00321734.5 | 20997 | GLAFIQDPDGYWIEILNPNK          | 1152.5891 | 2 | 63 | y7   | 35.8 | 98.8  |
| 1893 | IPI00321734.5 | 20997 | GLAFIQDPDGYWIEILNPNK          | 1152.5889 | 2 | 66 |      | 0.0  | 66.0  |
| 1894 | IPI00321734.5 | 20997 | GLAFIQDPDGYWIEILNPNK          | 1152.5894 | 2 | 67 |      | 0.0  | 67.0  |
| 1895 | IPI00321734.5 | 20997 | LDFPAMK                       | 411.2149  | 2 | 30 | y6   | 49.6 | 79.6  |
| 1896 | IPI00321734.5 | 20997 | RFEELGVK                      | 489.2748  | 2 | 45 | c b4 | 44.5 | 89.5  |
| 1897 | IPI00321734.5 | 20997 | SLDFYTR                       | 451.2248  | 2 | 19 | y5   | 69.8 | 88.8  |
| 1898 | IPI00321734.5 | 20997 | VLGLTLLQK                     | 492.8263  | 2 | 66 | y5   | 97.9 | 163.9 |
| 1899 | IPI00131438.1 | 70051 | AINPENGGFGVAPGTSVK            | 902.9646  | 2 | 32 | y7   | 23.8 | 55.8  |
| 1900 | IPI00131438.1 | 70051 | AINPENGGFGVAPGTSVK            | 903.4642  | 2 | 52 | P y6 | 14.6 | 66.6  |
| 1901 | IPI00131438.1 | 70051 | EIISFGSGYGGNSLLGK             | 849.9398  | 2 | 60 |      | 0.0  | 60.0  |
| 1902 | IPI00131438.1 | 70051 | EIISFGSGYGGNSLLGK             | 849.9397  | 2 | 76 | y8   | 12.9 | 88.9  |
| 1903 | IPI00131438.1 | 70051 | EVEEIDRYLEDQVNTDLPYEIER       | 956.7921  | 3 | 50 | P y6 | 49.6 | 99.6  |
| 1904 | IPI00131438.1 | 70051 | FLWPGFGENSR                   | 655.3204  | 2 | 26 | P y8 | 55.3 | 81.3  |
| 1905 | IPI00131438.1 | 70051 | GLGGVNVEELFGISK               | 760.4120  | 2 | 36 | y5   | 6.2  | 42.2  |
| 1906 | IPI00131438.1 | 70051 | TMYVIPFSMGPLGSPLAK            | 955.0032  | 2 | 39 |      | 0.0  | 39.0  |
| 1907 | IPI00131438.1 | 70051 | TNLAMMNPSLPGWK                | 780.3869  | 2 | 21 | P y4 | 20.6 | 41.6  |
| 1908 | IPI00131438.1 | 70051 | TVIITQEQR                     | 544.3096  | 2 | 40 | y7   | 12.9 | 52.9  |
| 1909 | IPI00131438.1 | 70051 | VLEWMFGR                      | 519.2664  | 2 | 37 | y6   | 49.6 | 86.6  |
| 1910 | IPI00121126.2 | 30697 | AQGSVALSVTQDPAR               | 750.3989  | 2 | 50 | y8   | 12.2 | 62.2  |
| 1911 | IPI00121126.2 | 30697 | AWLDGHSR                      | 471.2334  | 2 | 21 | y5   | 44.5 | 65.5  |
| 1912 | IPI00121126.2 | 30697 | AWLDGHSR                      | 471.2333  | 2 | 29 | y6   | 22.4 | 51.4  |
| 1913 | IPI00121126.2 | 30697 | AWLDGHSR                      | 314.4913  | 3 | 30 |      | 0.0  | 30.0  |
| 1914 | IPI00121126.2 | 30697 | DLGTQLAPIIQEFFHSEQYR          | 1197.1074 | 2 | 46 | y6   | 14.6 | 60.6  |
| 1915 | IPI00121126.2 | 30697 | QDVDVWLWQQEGSSK               | 903.4293  | 2 | 79 | y8   | 40.2 | 119.2 |
| 1916 | IPI00121126.2 | 30697 | QDVDVWLWQQEGSSK               | 902.9294  | 2 | 81 | y8   | 55.3 | 136.3 |
| 1917 | IPI00121126.2 | 30697 | QGEIFLLPAR                    | 572.3349  | 2 | 32 |      | 0.0  | 32.0  |
| 1918 | IPI00121126.2 | 30697 | TGKPNPDQLLK                   | 605.8434  | 2 | 16 | P y8 | 58.1 | 74.1  |
| 1919 | IPI00121126.2 | 30697 | TGKPNPDQLLK                   | 404.2316  | 3 | 29 | y4   | 20.6 | 49.6  |
| 1920 | IPI00121126.2 | 30697 | VLEQQQHR                      | 483.7597  | 2 | 43 | y6   | 22.4 | 65.4  |
| 1921 | IPI00121126.2 | 30697 | YYVGDTEVDLFEK                 | 789.3723  | 2 | 27 |      | 0.0  | 27.0  |
| 1922 | IPI00118384.1 | 29326 | AAFDDAIAELDTLSEESYKDSTLIMQLLR | 1087.2085 | 3 | 63 | y5   | 38.2 | 101.2 |
| 1923 | IPI00118384.1 | 29326 | DNLTLWTSMDMQGDGEEQNK          | 1091.4776 | 2 | 62 | y8   | 21.2 | 83.2  |
| 1924 | IPI00118384.1 | 29326 | EAAENSLVAYK                   | 597.8040  | 2 | 45 | y7   | 61.4 | 106.4 |

|      |               |        |                                  |           |   |    |         |      |       |
|------|---------------|--------|----------------------------------|-----------|---|----|---------|------|-------|
| 1925 | IPI00118384.1 | 29326  | HLIPAANTGESK                     | 619.3306  | 2 | 32 | P y9    | 85.6 | 117.6 |
| 1926 | IPI00118384.1 | 29326  | MDDREDLVYQAK                     | 762.8537  | 2 | 44 | y6      | 38.2 | 82.2  |
| 1927 | IPI00118384.1 | 29326  | MKGDYHR                          | 453.7167  | 2 | 38 | y5      | 16.9 | 54.9  |
| 1928 | IPI00118384.1 | 29326  | QMVETELK                         | 489.2521  | 2 | 47 |         | 0.0  | 47.0  |
| 1929 | IPI00118384.1 | 29326  | YLAEFATGNDRK                     | 692.8483  | 2 | 37 | y7      | 23.8 | 60.8  |
| 1930 | IPI00123313.1 | 118931 | AAVASLLQSVQVPEFTPK               | 943.5246  | 2 | 21 | P y6    | 82.7 | 103.7 |
| 1931 | IPI00123313.1 | 118931 | AAVASLLQSVQVPEFTPK               | 943.5281  | 2 | 34 | c b7    | 0.9  | 34.9  |
| 1932 | IPI00123313.1 | 118931 | LAYVAAGDLAPINAFIGGLAAQEVMK       | 868.8014  | 3 | 21 | b10 P   | 19.2 | 40.2  |
| 1933 | IPI00123313.1 | 118931 | NGFLNLALPFFGFSEPLAAPR            | 1140.6011 | 2 | 41 |         | 0.0  | 41.0  |
| 1934 | IPI00123313.1 | 118931 | VGPDTERIYDDDFQNLGDGVANALDNIDAR   | 1123.8650 | 3 | 62 | y7      | 46.8 | 108.8 |
| 1935 | IPI00230185.3 | 38176  | ANTIGISLIK                       | 515.3191  | 2 | 39 | y4      | 57.1 | 96.1  |
| 1936 | IPI00230185.3 | 38176  | DLMQTPNFR                        | 561.2746  | 2 | 27 | P y4    | 41.0 | 68.0  |
| 1937 | IPI00230185.3 | 38176  | DPAQGQLLK                        | 485.2718  | 2 | 23 | y5      | 57.1 | 80.1  |
| 1938 | IPI00230185.3 | 38176  | ELHSILQHK                        | 552.8120  | 2 | 36 |         | 0.0  | 36.0  |
| 1939 | IPI00230185.3 | 38176  | GLVDFKPLFTAVYK                   | 533.3045  | 3 | 24 |         | 0.0  | 24.0  |
| 1940 | IPI00230185.3 | 38176  | IVGSNAGR                         | 387.2168  | 2 | 42 | y6      | 25.4 | 67.4  |
| 1941 | IPI00230185.3 | 38176  | KLTEINTQHENVK                    | 556.3080  | 3 | 31 | y5      | 44.5 | 75.5  |
| 1942 | IPI00230185.3 | 38176  | LGIPMSVLMGANIASEVAEEK            | 1080.5596 | 2 | 50 | c b9    | 11.0 | 61.0  |
| 1943 | IPI00230185.3 | 38176  | LGLMEMIAFAK                      | 612.3301  | 2 | 73 | y7      | 65.2 | 138.2 |
| 1944 | IPI00230185.3 | 38176  | LISEVIGER                        | 508.2926  | 2 | 42 | y7      | 46.8 | 88.8  |
| 1945 | IPI00230185.3 | 38176  | LPPNVVAIPDVVQAATGADILVFVVPHQFIGK | 1109.2958 | 3 | 31 | P y7    | 65.2 | 96.2  |
| 1946 | IPI00230185.3 | 38176  | LTEIINTQHENVK                    | 513.6112  | 3 | 19 |         | 0.0  | 19.0  |
| 1947 | IPI00230185.3 | 38176  | LTEIINTQHENVK                    | 769.9201  | 2 | 73 | y8      | 58.1 | 131.1 |
| 1948 | IPI00408407.1 | 28797  | ALPFWNEEIVPQIK                   | 842.4608  | 2 | 30 | y5      | 49.1 | 79.1  |
| 1949 | IPI00408407.1 | 28797  | ALPFWNEEIVPQIK                   | 842.9605  | 2 | 53 | P y4    | 75.6 | 128.6 |
| 1950 | IPI00408407.1 | 28797  | AMEAVAAQ GK                      | 488.2502  | 2 | 65 | y5      | 75.6 | 140.6 |
| 1951 | IPI00408407.1 | 28797  | FSGWYDADLSPAGHEEAK               | 660.6370  | 3 | 32 |         | 0.0  | 32.0  |
| 1952 | IPI00408407.1 | 28797  | HGESAWNLENR                      | 656.8047  | 2 | 70 | y6      | 53.0 | 123.0 |
| 1953 | IPI00408407.1 | 28797  | HYGGLTGLNK                       | 530.2834  | 2 | 38 | y8      | 69.8 | 107.8 |
| 1954 | IPI00408407.1 | 28797  | NLKPIKPMQFLGDEETVRK              | 748.7432  | 3 | 28 |         | 0.0  | 28.0  |
| 1955 | IPI00408407.1 | 28797  | RGGQALR                          | 379.2252  | 2 | 28 | b5      | 13.7 | 41.7  |
| 1956 | IPI00408407.1 | 28797  | RVLIAAHGNSLR                     | 436.2615  | 3 | 56 | y5      | 38.2 | 94.2  |
| 1957 | IPI00408407.1 | 28797  | TLWTVLDAIDQMWLPVVR               | 1079.0839 | 2 | 18 | y5      | 35.8 | 53.8  |
| 1958 | IPI00408407.1 | 28797  | TLWTVLDAIDQMWLPVVR               | 1079.0841 | 2 | 31 | y5      | 49.6 | 80.6  |
| 1959 | IPI00112719.1 | 36456  | AGADIITYFAPQLLK                  | 867.4953  | 2 | 63 | y6      | 38.2 | 101.2 |
| 1960 | IPI00112719.1 | 36456  | DAAQSSPAFGDRR                    | 689.3281  | 2 | 38 |         | 0.0  | 38.0  |
| 1961 | IPI00112719.1 | 36456  | DEQGSAADESDSPTIEAVR              | 988.9393  | 2 | 74 | P y7    | 46.8 | 120.8 |
| 1962 | IPI00112719.1 | 36456  | DIQEGADMLMVKPLPYLDMVR            | 831.4196  | 3 | 16 | P y++10 | 57.1 | 73.1  |
| 1963 | IPI00112719.1 | 36456  | LAEVALAYAK                       | 524.8057  | 2 | 43 | y8      | 44.3 | 87.3  |
| 1964 | IPI00112719.1 | 36456  | MHHQSVLHSGYFHPLLR                | 421.0167  | 5 | 21 |         | 0.0  | 21.0  |
| 1965 | IPI00112719.1 | 36456  | VSVMSYSAK                        | 486.2468  | 2 | 31 | y6      | 62.3 | 93.3  |



|      |               |       |                                          |           |   |    |        |      |       |
|------|---------------|-------|------------------------------------------|-----------|---|----|--------|------|-------|
| 1966 | IPI00112719.1 | 36456 | YGVNQLEEMLRPLVEAGLR                      | 729.7226  | 3 | 22 |        | 0.0  | 22.0  |
| 1967 | IPI00112719.1 | 36456 | YGVNQLEEMLRPLVEAGLR                      | 730.0580  | 3 | 46 |        | 0.0  | 46.0  |
| 1968 | IPI00112719.1 | 36456 | YGVNQLEEMLRPLVEAGLR                      | 730.0605  | 3 | 47 | P y8   | 30.4 | 77.4  |
| 1969 | IPI00400050.1 | 68093 | QGWLM EVTDSLDR                           | 775.3700  | 2 | 45 | y6     | 5.9  | 50.9  |
| 1970 | IPI00336324.4 | 40541 | AIADHIR                                  | 398.2273  | 2 | 36 | y5     | 44.5 | 80.5  |
| 1971 | IPI00336324.4 | 40541 | DLDVAVLVGSMR                             | 686.3671  | 2 | 23 | y5     | 16.9 | 39.9  |
| 1972 | IPI00336324.4 | 40541 | DLDVAVLVGSMR                             | 686.3691  | 2 | 61 | y5     | 29.5 | 90.5  |
| 1973 | IPI00336324.4 | 40541 | ETAFEFLSSA                               | 1101.5093 | 1 | 30 |        | 0.0  | 30.0  |
| 1974 | IPI00336324.4 | 40541 | ETAFEFLSSA                               | 1101.5141 | 1 | 31 |        | 0.0  | 31.0  |
| 1975 | IPI00336324.4 | 40541 | EVGVYEALK                                | 1007.5436 | 1 | 35 |        | 0.0  | 35.0  |
| 1976 | IPI00336324.4 | 40541 | EVGVYEALK                                | 504.2739  | 2 | 49 | y5     | 69.8 | 118.8 |
| 1977 | IPI00336324.4 | 40541 | EVGVYEALKDDSWLK                          | 876.4460  | 2 | 54 | y4     | 62.3 | 116.3 |
| 1978 | IPI00336324.4 | 40541 | FVEGLPINDFSR                             | 697.3683  | 2 | 36 | P y7   | 61.4 | 97.4  |
| 1979 | IPI00336324.4 | 40541 | FVEGLPINDFSR                             | 697.3683  | 2 | 50 | P y7   | 77.6 | 127.6 |
| 1980 | IPI00336324.4 | 40541 | GAAVIK                                   | 558.3606  | 1 | 22 |        | 0.0  | 22.0  |
| 1981 | IPI00336324.4 | 40541 | GEFITTQQQR                               | 589.8125  | 2 | 55 | y6     | 27.2 | 82.2  |
| 1982 | IPI00336324.4 | 40541 | LGVTADDVK                                | 459.2509  | 2 | 28 | y6     | 69.8 | 97.8  |
| 1983 | IPI00336324.4 | 40541 | LSSAMSAK                                 | 433.2260  | 2 | 22 | y7     | 49.6 | 71.6  |
| 1984 | IPI00336324.4 | 40541 | REGMER                                   | 389.1876  | 2 | 20 | c b5   | 25.4 | 45.4  |
| 1985 | IPI00336324.4 | 40541 | SQIALK                                   | 330.2081  | 2 | 31 | c b5   | 25.4 | 56.4  |
| 1986 | IPI00336324.4 | 40541 | SQIALK                                   | 659.4078  | 1 | 38 | c b4   | 29.5 | 67.5  |
| 1987 | IPI00137409.2 | 69165 | DAIVQAVK                                 | 422.2508  | 2 | 23 |        | 0.0  | 23.0  |
| 1988 | IPI00137409.2 | 69165 | GHAAPILYAVWAEAGFLPEAELNLRK               | 738.4083  | 4 | 25 |        | 0.0  | 25.0  |
| 1989 | IPI00137409.2 | 69165 | HQPTAIIAK                                | 489.7904  | 2 | 19 | P y7   | 49.6 | 68.6  |
| 1990 | IPI00137409.2 | 69165 | IIALDGDTK                                | 473.2668  | 2 | 27 | y7     | 61.4 | 88.4  |
| 1991 | IPI00137409.2 | 69165 | LAVSQVPR                                 | 435.2640  | 2 | 50 | y6     | 53.0 | 103.0 |
| 1992 | IPI00137409.2 | 69165 | LDNLVAIFDINR                             | 701.8881  | 2 | 56 | y7     | 22.4 | 78.4  |
| 1993 | IPI00137409.2 | 69165 | NMAEQIIQEIYSQVQSK                        | 670.6717  | 3 | 39 | y7     | 49.6 | 88.6  |
| 1994 | IPI00137409.2 | 69165 | NMAEQIIQEIYSQVQSK                        | 670.3388  | 3 | 50 | y7     | 49.6 | 99.6  |
| 1995 | IPI00137409.2 | 69165 | NMAEQIIQEIYSQVQSK                        | 1005.0048 | 2 | 52 | y6     | 49.6 | 101.6 |
| 1996 | IPI00137409.2 | 69165 | NMAEQIIQEIYSQVQSK                        | 1005.5067 | 2 | 55 | y6     | 53.0 | 108.0 |
| 1997 | IPI00137409.2 | 69165 | NMAEQIIQEIYSQVQSK                        | 1005.5064 | 2 | 61 | y7     | 49.6 | 110.6 |
| 1998 | IPI00111218.1 | 57015 | TFVQENVYDEFVER                           | 888.4220  | 2 | 73 | c b7   | 29.5 | 102.5 |
| 1999 | IPI00111218.1 | 57015 | VAEQTPLTALYVANLIK                        | 923.0312  | 2 | 58 | y7     | 33.8 | 91.8  |
| 2000 | IPI00111218.1 | 57015 | VAEQTPLTALYVANLIK                        | 922.5341  | 2 | 67 |        | 0.0  | 67.0  |
| 2001 | IPI00126172.1 | 35430 | IAEVGGVPYLLPLV NK                        | 841.9979  | 2 | 37 |        | 0.0  | 37.0  |
| 2002 | IPI00126172.1 | 35430 | IAEVGGVPYLLPLV NK                        | 841.9980  | 2 | 53 | c b7 P | 13.7 | 66.7  |
| 2003 | IPI00126172.1 | 35430 | LPGAFILGAGAGPFQTLGFNSEFMPIVQTASEHNQPVNGS | 950.6705  | 5 | 19 | b9     | 13.7 | 32.7  |
| 2004 | IPI00126172.1 | 35430 | LPGAFILGAGAGPFQTLGFNSEFMPIVQTASEHNQPVNGS | 1187.8476 | 4 | 45 | b7     | 20.6 | 65.6  |
| 2005 | IPI00126172.1 | 35430 | LPGAFILGAGAGPFQTLGFNSEFMPIVQTASEHNQPVNGS | 1188.3295 | 4 | 49 | y++13  | 2.7  | 51.7  |
| 2006 | IPI00126172.1 | 35430 | LPGAFILGAGAGPFQTLGFNSEFMPIVQTASEHNQPVNGS | 1188.0950 | 4 | 66 | y++13  | 2.2  | 68.2  |

|      |               |        |                                           |           |   |     |       |       |       |
|------|---------------|--------|-------------------------------------------|-----------|---|-----|-------|-------|-------|
| 2007 | IPI00126172.1 | 35430  | LPGAFILGAGAGPFQTLGFNFSEFMPIVQTASEHNQPVNGS | 1188.5918 | 4 | 73  | y7    | 12.9  | 85.9  |
| 2008 | IPI00126172.1 | 35430  | QTLEEHYGDKPVGMMGGTFIVQK                   | 812.4079  | 3 | 15  | y8    | 33.8  | 48.8  |
| 2009 | IPI00126172.1 | 35430  | QTLEEHYGDKPVGMMGGTFIVQK                   | 812.4079  | 3 | 28  |       | 0.0   | 28.0  |
| 2010 | IPI00126172.1 | 35430  | VIEVQAK                                   | 393.7397  | 2 | 25  | y4    | 57.1  | 82.1  |
| 2011 | IPI00126172.1 | 35430  | VYDLNEIAK                                 | 532.7846  | 2 | 30  | y7    | 102.5 | 132.5 |
| 2012 | IPI00123927.1 | 46091  | IFNSGADLSGITEENAPLK                       | 989.0045  | 2 | 88  | y8    | 58.1  | 146.1 |
| 2013 | IPI00123927.1 | 46091  | IFNSGADLSGITEENAPLK                       | 989.0044  | 2 | 104 | y++16 | 15.5  | 119.5 |
| 2014 | IPI00123927.1 | 46091  | LAQIHIPR                                  | 316.5310  | 3 | 31  | c b5  | 20.6  | 51.6  |
| 2015 | IPI00128857.1 | 64585  | AIVVTDGER                                 | 480.2620  | 2 | 30  | y6    | 25.4  | 55.4  |
| 2016 | IPI00128857.1 | 64585  | EVFAHEHEEMK                               | 693.3117  | 2 | 38  | y7    | 82.7  | 120.7 |
| 2017 | IPI00128857.1 | 64585  | GHIASVLNAWPEDVVK                          | 867.9586  | 2 | 57  | P y6  | 82.7  | 139.7 |
| 2018 | IPI00128857.1 | 64585  | GHIASVLNAWPEDVVK                          | 867.9612  | 2 | 62  | P y6  | 125.8 | 187.8 |
| 2019 | IPI00128857.1 | 64585  | LSDQTVLFQGAGEAALGIAHLVVMAMEK              | 967.5046  | 3 | 30  | b6    | 13.7  | 43.7  |
| 2020 | IPI00128857.1 | 64585  | LSDQTVLFQGAGEAALGIAHLVVMAMEK              | 967.5090  | 3 | 48  |       | 0.0   | 48.0  |
| 2021 | IPI00128857.1 | 64585  | NLEAIVQK                                  | 457.7687  | 2 | 40  | y6    | 53.0  | 93.0  |
| 2022 | IPI00118899.1 | 105368 | DDPVTNLNNAFEVAEK                          | 888.4237  | 2 | 56  | c b8  | 5.4   | 61.4  |
| 2023 | IPI00118899.1 | 105368 | RDHALLEEQSK                               | 442.5652  | 3 | 28  | y6    | 69.8  | 97.8  |
| 2024 | IPI00118899.1 | 105368 | VGWEQLLTTIAR                              | 693.8915  | 2 | 68  | y5    | 35.8  | 103.8 |
| 2025 | IPI00118899.1 | 105368 | VGWEQLLTTIAR                              | 693.8915  | 2 | 72  | y4    | 41.0  | 113.0 |
| 2026 | IPI00118899.1 | 105368 | VGWEQLLTTIAR                              | 693.8915  | 2 | 77  | y6    | 7.1   | 84.1  |
| 2027 | IPI00118059.1 | 53065  | ADRDLWASHEK                               | 514.5833  | 3 | 41  | y5    | 44.5  | 85.5  |
| 2028 | IPI00118059.1 | 53065  | AGMIFYR                                   | 429.2209  | 2 | 40  | y4    | 83.9  | 123.9 |
| 2029 | IPI00118059.1 | 53065  | ALSDALTELGYS                              | 640.8461  | 2 | 85  | y6    | 38.2  | 123.2 |
| 2030 | IPI00118059.1 | 53065  | GLLEEDFQK                                 | 539.7745  | 2 | 23  | y5    | 27.2  | 50.2  |
| 2031 | IPI00118059.1 | 53065  | IQSAVATLREEVENFASNFSPLGPLPDF              | 984.8328  | 3 | 20  | y7    | 53.0  | 73.0  |
| 2032 | IPI00118059.1 | 53065  | IQSAVATLREEVENFASNFSPLGPLPDF              | 984.8329  | 3 | 28  | P y6  | 69.8  | 97.8  |
| 2033 | IPI00118059.1 | 53065  | IQSAVATLREEVENFASNFSPLGPLPDF              | 984.8328  | 3 | 33  |       | 0.0   | 33.0  |
| 2034 | IPI00118059.1 | 53065  | LGTPALTSR                                 | 458.2667  | 2 | 40  |       | 0.0   | 40.0  |
| 2035 | IPI00118059.1 | 53065  | QAMTTEFK                                  | 478.2318  | 2 | 25  |       | 0.0   | 25.0  |
| 2036 | IPI00118059.1 | 53065  | SALRPSGLR                                 | 319.5261  | 3 | 21  |       | 0.0   | 21.0  |
| 2037 | IPI00118059.1 | 53065  | SALRPSGLR                                 | 478.7856  | 2 | 23  | P y5  | 49.6  | 72.6  |
| 2038 | IPI00118059.1 | 53065  | VAHFIHR                                   | 440.2513  | 2 | 53  |       | 0.0   | 53.0  |
| 2039 | IPI00118059.1 | 53065  | VYPETGYINYDQLEENASLFHPK                   | 910.1038  | 3 | 20  |       | 0.0   | 20.0  |
| 2040 | IPI00118059.1 | 53065  | VYPETGYINYDQLEENASLFHPK                   | 910.1037  | 3 | 32  |       | 0.0   | 32.0  |
| 2041 | IPI00228633.3 | 62956  | EFGIDPQNMFEFWDVWVGR                       | 1166.0231 | 2 | 65  | y6    | 14.6  | 79.6  |
| 2042 | IPI00228633.3 | 62956  | EVMQMLVELAK                               | 645.8439  | 2 | 62  | y4    | 57.1  | 119.1 |
| 2043 | IPI00228633.3 | 62956  | GKLPEEARK                                 | 343.2015  | 3 | 33  | c b5  | 7.7   | 40.7  |
| 2044 | IPI00228633.3 | 62956  | HFVALSTNTAK                               | 594.8225  | 2 | 39  | y9    | 40.2  | 79.2  |
| 2045 | IPI00228633.3 | 62956  | ILLANFLAQTEALMK                           | 559.6538  | 3 | 26  |       | 0.0   | 26.0  |
| 2046 | IPI00228633.3 | 62956  | ILLANFLAQTEALMK                           | 838.4768  | 2 | 65  | y8    | 30.4  | 95.4  |
| 2047 | IPI00228633.3 | 62956  | LTPFILGALIAMYEHK                          | 606.3397  | 3 | 22  | y++13 | 18.3  | 40.3  |

|      |               |       |                                |           |   |    |        |       |       |
|------|---------------|-------|--------------------------------|-----------|---|----|--------|-------|-------|
| 2048 | IPI00228633.3 | 62956 | TLASLSPETSLFIIASK              | 889.5005  | 2 | 58 |        | 0.0   | 58.0  |
| 2049 | IPI00228633.3 | 62956 | VFEGNRPTNSIVFTK                | 570.3061  | 3 | 15 | y++12  | 29.0  | 44.0  |
| 2050 | IPI00121280.2 | 25864 | GLAHAIR                        | 369.2247  | 2 | 32 | y4     | 57.1  | 89.1  |
| 2051 | IPI00121280.2 | 25864 | LGLDFPNLPYLIDGSHK              | 634.0061  | 3 | 32 | c b5 P | 18.5  | 50.5  |
| 2052 | IPI00121280.2 | 25864 | LGLDFPNLPYLIDGSHK              | 950.5054  | 2 | 39 | c b5 P | 7.7   | 46.7  |
| 2053 | IPI00121280.2 | 25864 | LGLDFPNLPYLIDGSHK              | 950.0068  | 2 | 51 | y7     | 23.8  | 74.8  |
| 2054 | IPI00311818.1 | 40320 | ANQVIR                         | 742.4265  | 1 | 23 |        | 0.0   | 23.0  |
| 2055 | IPI00311818.1 | 40320 | IIGIDINK                       | 885.5399  | 1 | 35 | y6     | 75.6  | 110.6 |
| 2056 | IPI00311818.1 | 40320 | IIGIDINK                       | 443.2736  | 2 | 48 | y6     | 69.8  | 117.8 |
| 2057 | IPI00311818.1 | 40320 | IKVDEFVTGNLSFDQINQAFDLMHSGDSIR | 850.1683  | 4 | 51 |        | 0.0   | 51.0  |
| 2058 | IPI00311818.1 | 40320 | SALEAAHK                       | 413.7246  | 2 | 42 | y5     | 41.0  | 83.0  |
| 2059 | IPI00311818.1 | 40320 | SVESVPK                        | 745.4083  | 1 | 15 |        | 0.0   | 15.0  |
| 2060 | IPI00311818.1 | 40320 | SVESVPK                        | 373.2085  | 2 | 25 | y4     | 16.9  | 41.9  |
| 2061 | IPI00311818.1 | 40320 | VDEFVTGNLSFDQINQAFDLMHSGDSIR   | 1053.1635 | 3 | 46 |        | 0.0   | 46.0  |
| 2062 | IPI00311818.1 | 40320 | VDEFVTGNLSFDQINQAFDLMHSGDSIR   | 1052.8325 | 3 | 57 | b4     | 49.1  | 106.1 |
| 2063 | IPI00311818.1 | 40320 | VDEFVTGNLSFDQINQAFDLMHSGDSIR   | 1052.8278 | 3 | 58 | y++16  | 9.3   | 67.3  |
| 2064 | IPI00341613.2 | 36271 | RVIISAPSANAPMFVMGVNHXK         | 593.3089  | 4 | 16 | b6 P   | 23.8  | 39.8  |
| 2065 | IPI00341613.2 | 36271 | RVIISAPSANAPMFVMGVNHXK         | 593.0634  | 4 | 27 |        | 0.0   | 27.0  |
| 2066 | IPI00341613.2 | 36271 | RVIISAPSANAPMFVMGVNHXK         | 790.7565  | 3 | 33 | b6 P   | 15.6  | 48.6  |
| 2067 | IPI00320208.1 | 24849 | TPAGLQVLNDYLDLADK              | 809.4278  | 2 | 77 | y8     | 32.0  | 109.0 |
| 2068 | IPI00320208.1 | 24849 | TPAGLQVLNDYLDLADK              | 809.4276  | 2 | 90 | y8     | 58.1  | 148.1 |
| 2069 | IPI00270906.2 | 17002 | EGMNIVEAMER                    | 639.7936  | 2 | 43 | y6     | 25.4  | 68.4  |
| 2070 | IPI00270906.2 | 17002 | FEDENFILK                      | 577.7903  | 2 | 47 | y7     | 82.7  | 129.7 |
| 2071 | IPI00270906.2 | 17002 | GSSFHR                         | 345.6697  | 2 | 18 | y4     | 15.6  | 33.6  |
| 2072 | IPI00270906.2 | 17002 | SIYGKFEFEDENFILK               | 916.4602  | 2 | 49 | y5     | 57.1  | 106.1 |
| 2073 | IPI00270906.2 | 17002 | TAENFR                         | 369.1826  | 2 | 19 | y4     | 41.0  | 60.0  |
| 2074 | IPI00270906.2 | 17002 | TEWLDGK                        | 424.7115  | 2 | 25 | y5     | 102.5 | 127.5 |
| 2075 | IPI00270906.2 | 17002 | VNPTVFFDITADDEPLGR             | 1025.0018 | 2 | 35 | P y4   | 41.0  | 76.0  |
| 2076 | IPI00270906.2 | 17002 | VNPTVFFDITADDEPLGR             | 1004.0012 | 2 | 63 | y7     | 23.8  | 86.8  |
| 2077 | IPI00270906.2 | 17002 | VSFELFADK                      | 528.2742  | 2 | 46 | y4     | 89.0  | 135.0 |
| 2078 | IPI00270906.2 | 17002 | VSFELFADKVPK                   | 460.5904  | 3 | 36 |        | 0.0   | 36.0  |
| 2079 | IPI00114818.1 | 46727 | AGEMTEVLPNQR                   | 672.8382  | 2 | 58 | P y4   | 41.0  | 99.0  |
| 2080 | IPI00114818.1 | 46727 | FDNTYSFIHAK                    | 448.2194  | 3 | 18 |        | 0.0   | 18.0  |
| 2081 | IPI00114818.1 | 46727 | FDNTYSFIHAK                    | 671.8276  | 2 | 54 | y6     | 35.8  | 89.8  |
| 2082 | IPI00114818.1 | 46727 | FRENVQDVLPTLPNPDYFLLR          | 888.1272  | 3 | 19 |        | 0.0   | 19.0  |
| 2083 | IPI00114818.1 | 46727 | IISWQPPEVIQYLSGGR              | 691.3716  | 3 | 30 | y5     | 13.7  | 43.7  |
| 2084 | IPI00114818.1 | 46727 | IISWQPPEVIQYLSGGR              | 1036.5540 | 2 | 43 | c b5 P | 62.3  | 105.3 |
| 2085 | IPI00114818.1 | 46727 | IISWQPPEVIQYLSGGR              | 1036.5546 | 2 | 47 |        | 0.0   | 47.0  |
| 2086 | IPI00114818.1 | 46727 | IISWQPPEVIQYLSGGR              | 1036.5542 | 2 | 50 | y8     | 0.4   | 50.4  |
| 2087 | IPI00114818.1 | 46727 | IMVLGANWK                      | 516.2893  | 2 | 38 | y7     | 46.8  | 84.8  |
| 2088 | IPI00114818.1 | 46727 | INYGGDIPK                      | 488.7590  | 2 | 36 | y7     | 95.7  | 131.7 |

|      |               |       |                           |           |   |    |       |      |       |
|------|---------------|-------|---------------------------|-----------|---|----|-------|------|-------|
| 2089 | IPI00114818.1 | 46727 | LFPVAYNLIK                | 589.3554  | 2 | 22 | P y8  | 44.3 | 66.3  |
| 2090 | IPI00114818.1 | 46727 | PFLSEDTR                  | 482.7401  | 2 | 25 | y6    | 14.6 | 39.6  |
| 2091 | IPI00114818.1 | 46727 | QQYEHTVQVSR               | 687.8424  | 2 | 22 | y4    | 7.1  | 29.1  |
| 2092 | IPI00114818.1 | 46727 | RLFVVK                    | 381.2555  | 2 | 26 | b4    | 16.9 | 42.9  |
| 2093 | IPI00114818.1 | 46727 | SEAMLRK                   | 417.7286  | 2 | 21 | y4    | 16.9 | 37.9  |
| 2094 | IPI00114818.1 | 46727 | VGDLSPKQEEALAK            | 495.6037  | 3 | 22 |       | 0.0  | 22.0  |
| 2095 | IPI00228820.3 | 25871 | KKPEYLEGLPEK              | 715.9035  | 2 | 21 |       | 0.0  | 21.0  |
| 2096 | IPI00228820.3 | 25871 | KKPEYLEGLPEK              | 477.6012  | 3 | 24 | y5    | 29.5 | 53.5  |
| 2097 | IPI00136134.1 | 41105 | AELQEVQITEEKPLLPGQTPETAK  | 898.1404  | 3 | 39 |       | 0.0  | 39.0  |
| 2098 | IPI00136134.1 | 41105 | AELQEVQITEEKPLLPGQTPETAK  | 898.1439  | 3 | 41 | P y9  | 42.2 | 83.2  |
| 2099 | IPI00136134.1 | 41105 | FGDMQEIIQNFVR             | 798.8942  | 2 | 60 | y5    | 6.6  | 66.6  |
| 2100 | IPI00136134.1 | 41105 | GIIQHAPNLENIELYWNSYNNRR   | 704.6083  | 4 | 57 | y++13 | 16.8 | 73.8  |
| 2101 | IPI00136134.1 | 41105 | LDPTQTSFLK                | 575.3114  | 2 | 34 | P y8  | 58.1 | 92.1  |
| 2102 | IPI00136134.1 | 41105 | PLLPGQTPETAK              | 626.3547  | 2 | 27 | P y9  | 66.6 | 93.6  |
| 2103 | IPI00136134.1 | 41105 | YALNHPDVEGLVLINIDPNAK     | 803.0953  | 3 | 27 | P y4  | 41.0 | 68.0  |
| 2104 | IPI00136134.1 | 41105 | YRGIIQHAPNLENIELYWNSYNNRR | 784.4012  | 4 | 22 |       | 0.0  | 22.0  |
| 2105 | IPI00396707.1 | 46039 | ELDQDTV FALANYILFK        | 1001.0250 | 2 | 46 | y8    | 5.6  | 51.6  |
| 2106 | IPI00396707.1 | 46039 | IFNNGADLSGITEENAPLK       | 668.6747  | 3 | 39 | y8    | 21.2 | 60.2  |
| 2107 | IPI00121209.1 | 30569 | ARPALEDLR                 | 347.5331  | 3 | 37 |       | 0.0  | 37.0  |
| 2108 | IPI00121209.1 | 30569 | DFANVYVDAVK               | 620.8142  | 2 | 46 | y6    | 89.0 | 135.0 |
| 2109 | IPI00121209.1 | 30569 | DFWDNLEK                  | 533.7457  | 2 | 15 | y6    | 46.8 | 61.8  |
| 2110 | IPI00121209.1 | 30569 | KWKEDVELYR                | 455.9100  | 3 | 30 | y4    | 15.6 | 45.6  |
| 2111 | IPI00121209.1 | 30569 | LGPLTR                    | 328.7081  | 2 | 35 | y5    | 41.0 | 76.0  |
| 2112 | IPI00121209.1 | 30569 | LQELQGR                   | 422.2379  | 2 | 28 | y4    | 27.2 | 55.2  |
| 2113 | IPI00121209.1 | 30569 | LSPVAEEFRDR               | 659.8419  | 2 | 18 |       | 0.0  | 18.0  |
| 2114 | IPI00121209.1 | 30569 | SNPTLNEYHTR               | 666.3224  | 2 | 46 | y6    | 25.4 | 71.4  |
| 2115 | IPI00121209.1 | 30569 | THVDSL R                  | 414.2220  | 2 | 28 | y4    | 41.0 | 69.0  |
| 2116 | IPI00121209.1 | 30569 | TQLAPHSEQMR               | 649.3197  | 2 | 23 | P y7  | 61.4 | 84.4  |
| 2117 | IPI00121209.1 | 30569 | VAPLGAELQESAR             | 670.8620  | 2 | 64 | y5    | 15.6 | 79.6  |
| 2118 | IPI00121209.1 | 30569 | VQPYLDEFQK                | 633.8252  | 2 | 15 | y5    | 44.5 | 59.5  |
| 2119 | IPI00118676.3 | 46353 | ATQALVLAPTR               | 570.8407  | 2 | 42 | y4    | 16.9 | 58.9  |
| 2120 | IPI00118676.3 | 46353 | ELAQQIQK                  | 479.2721  | 2 | 29 | y4    | 20.6 | 49.6  |
| 2121 | IPI00118676.3 | 46353 | GIYAYGFEK                 | 524.2608  | 2 | 23 | y7    | 46.8 | 69.8  |
| 2122 | IPI00118676.3 | 46353 | GYDVIAQAQSGTGK            | 697.8578  | 2 | 87 | y9    | 66.6 | 153.6 |
| 2123 | IPI00118676.3 | 46353 | LNSNTQVVLLSATMPSDVLEVTKK  | 863.4742  | 3 | 41 |       | 0.0  | 41.0  |
| 2124 | IPI00118676.3 | 46353 | MFVLDEADEMLSR             | 778.3611  | 2 | 49 | y6    | 65.2 | 114.2 |
| 2125 | IPI00118676.3 | 46353 | PSAIQQR                   | 400.2250  | 2 | 40 | y5    | 15.6 | 55.6  |
| 2126 | IPI00118676.3 | 46353 | TLRDIETFYNTSIEEMPLNVADLI  | 933.4709  | 3 | 42 | c b8  | 12.2 | 54.2  |
| 2127 | IPI00110684.1 | 33102 | DFAVDIIK                  | 460.7585  | 2 | 24 | y6    | 69.8 | 93.8  |
| 2128 | IPI00110684.1 | 33102 | DVFHVVVEVPR               | 443.2327  | 3 | 50 | y4    | 29.5 | 79.5  |
| 2129 | IPI00110684.1 | 33102 | STHDYWK                   | 468.7139  | 2 | 27 | y5    | 44.5 | 71.5  |

|      |               |       |                           |           |   |    |        |      |       |
|------|---------------|-------|---------------------------|-----------|---|----|--------|------|-------|
| 2130 | IPI00110684.1 | 33102 | VIAINVDDPDAANYK           | 809.4085  | 2 | 70 | P y7   | 33.8 | 103.8 |
| 2131 | IPI00110684.1 | 33102 | VLGILAMIDEGETDWK          | 895.4588  | 2 | 90 | y8     | 61.4 | 151.4 |
| 2132 | IPI00110684.1 | 33102 | YVANLFPYK                 | 557.8034  | 2 | 24 | y7     | 46.8 | 70.8  |
| 2133 | IPI00131803.1 | 20958 | FKVETFR                   | 463.7583  | 2 | 29 | y4     | 29.5 | 58.5  |
| 2134 | IPI00131803.1 | 20958 | FREWHHFLVVNMK             | 436.7300  | 4 | 23 | y4     | 62.3 | 85.3  |
| 2135 | IPI00131803.1 | 20958 | FREWHHFLVVNMK             | 581.6365  | 3 | 24 | c b5   | 25.4 | 49.4  |
| 2136 | IPI00131803.1 | 20958 | FREWHHFLVVNMK             | 436.4794  | 4 | 25 | y4     | 62.3 | 87.3  |
| 2137 | IPI00131803.1 | 20958 | FREWHHFLVVNMK             | 871.9503  | 2 | 46 | c b5   | 14.6 | 60.6  |
| 2138 | IPI00131803.1 | 20958 | GNDISSGTVLSDYVGSPPSGTGLHR | 844.4102  | 3 | 39 |        | 0.0  | 39.0  |
| 2139 | IPI00131803.1 | 20958 | GNDISSGTVLSDYVGSPPSGTGLHR | 844.4100  | 3 | 47 | y10    | 26.5 | 73.5  |
| 2140 | IPI00131803.1 | 20958 | LYEQLSGK                  | 469.2533  | 2 | 46 | y6     | 49.6 | 95.6  |
| 2141 | IPI00131803.1 | 20958 | VDYAGVTVDELGK             | 683.3489  | 2 | 59 | y7     | 49.6 | 108.6 |
| 2142 | IPI00131803.1 | 20958 | VDYAGVTVDELGK             | 683.3489  | 2 | 66 | y7     | 82.7 | 148.7 |
| 2143 | IPI00131803.1 | 20958 | VLTPQTQVMNRPSSISWDGLDPGK  | 833.7634  | 3 | 16 | c b9   | 13.7 | 29.7  |
| 2144 | IPI00131803.1 | 20958 | VLTPQTQVMNRPSSISWDGLDPGK  | 833.7601  | 3 | 19 |        | 0.0  | 19.0  |
| 2145 | IPI00131803.1 | 20958 | VLTPQTQVMNRPSSISWDGLDPGK  | 833.7631  | 3 | 20 | y9     | 38.2 | 58.2  |
| 2146 | IPI00131803.1 | 20958 | VLTPQTQVMNRPSSISWDGLDPGK  | 833.7632  | 3 | 22 |        | 0.0  | 22.0  |
| 2147 | IPI00221636.1 | 33502 | AADFPQELFSWE              | 720.3276  | 2 | 45 | c b8   | 46.8 | 91.8  |
| 2148 | IPI00221636.1 | 33502 | EQVPWK                    | 393.7108  | 2 | 15 | y4     | 44.5 | 59.5  |
| 2149 | IPI00221636.1 | 33502 | GITGDWK                   | 388.7004  | 2 | 25 | y4     | 7.7  | 32.7  |
| 2150 | IPI00221636.1 | 33502 | IYFENFLQGK                | 629.8278  | 2 | 67 | y8     | 90.2 | 157.2 |
| 2151 | IPI00221636.1 | 33502 | LMASLLPIQLFPK             | 736.4421  | 2 | 34 | P y7   | 35.8 | 69.8  |
| 2152 | IPI00221636.1 | 33502 | NHFTVAQAEAFDK             | 493.2413  | 3 | 44 | y6     | 49.6 | 93.6  |
| 2153 | IPI00221636.1 | 33502 | NHFTVAQAEAFDK             | 739.3643  | 2 | 49 | y8     | 73.4 | 122.4 |
| 2154 | IPI00221636.1 | 33502 | NISFQIMK                  | 490.7659  | 2 | 24 | y6     | 65.2 | 89.2  |
| 2155 | IPI00221636.1 | 33502 | SFFSSK                    | 702.3536  | 1 | 28 | y4     | 57.1 | 85.1  |
| 2156 | IPI00221636.1 | 33502 | SFFSSK                    | 351.6766  | 2 | 28 | y4     | 25.4 | 53.4  |
| 2157 | IPI00221636.1 | 33502 | TPWIEFENNYR               | 734.8457  | 2 | 41 | y7     | 22.4 | 63.4  |
| 2158 | IPI00221636.1 | 33502 | VIYLIR                    | 388.7552  | 2 | 30 | y4     | 57.1 | 87.1  |
| 2159 | IPI00224740.3 | 15119 | DRSSFFVNGLTLGGQK          | 575.9696  | 3 | 19 | y6     | 46.8 | 65.8  |
| 2160 | IPI00224740.3 | 15119 | DRSSFFVNGLTLGGQK          | 576.3034  | 3 | 31 | y6     | 46.8 | 77.8  |
| 2161 | IPI00224740.3 | 15119 | DRSSFFVNGLTLGGQK          | 863.4480  | 2 | 73 | y9     | 12.2 | 85.2  |
| 2162 | IPI00224740.3 | 15119 | DSPSVWAAVPGK              | 607.3163  | 2 | 34 | c b9 P | 12.2 | 46.2  |
| 2163 | IPI00224740.3 | 15119 | EGVHGGLINKK               | 576.3301  | 2 | 29 |        | 0.0  | 29.0  |
| 2164 | IPI00224740.3 | 15119 | SSFFVNGLTLGGQK            | 728.3861  | 2 | 32 | y6     | 25.4 | 57.4  |
| 2165 | IPI00224740.3 | 15119 | SSFFVNGLTLGGQK            | 728.3862  | 2 | 42 |        | 0.0  | 42.0  |
| 2166 | IPI00224740.3 | 15119 | TFVSITPAEVBVLVVK          | 808.9673  | 2 | 35 | c b6 P | 13.7 | 48.7  |
| 2167 | IPI00224740.3 | 15119 | TFVSITPAEVBVLVVK          | 808.9673  | 2 | 43 | P y10  | 93.7 | 136.7 |
| 2168 | IPI00224740.3 | 15119 | TFVSITPAEVBVLVVK          | 808.9673  | 2 | 44 | P y10  | 61.2 | 105.2 |
| 2169 | IPI00224740.3 | 15119 | TLVLLMGK                  | 437.7749  | 2 | 35 | y6     | 82.7 | 117.7 |
| 2170 | IPI00115212.1 | 20920 | AGEYSVTYDGFNTFTIPK        | 1005.9834 | 2 | 43 | c b6   | 16.9 | 59.9  |

|      |               |       |                             |           |   |    |        |      |       |
|------|---------------|-------|-----------------------------|-----------|---|----|--------|------|-------|
| 2171 | IPI00115212.1 | 20920 | AGEYSVTYDGFNTFTIPK          | 1005.9834 | 2 | 46 |        | 0.0  | 46.0  |
| 2172 | IPI00115212.1 | 20920 | DGETFQLMGLYGREPDLSSDIK      | 824.7314  | 3 | 37 | y++15  | 16.8 | 53.8  |
| 2173 | IPI00115212.1 | 20920 | DGETFQLMGLYGREPDLSSDIK      | 824.7313  | 3 | 44 | y++16  | 31.7 | 75.7  |
| 2174 | IPI00115212.1 | 20920 | ENIIDLSNANR                 | 629.8231  | 2 | 56 | y5     | 25.4 | 81.4  |
| 2175 | IPI00115212.1 | 20920 | IEDNGNFR                    | 482.7284  | 2 | 34 | y6     | 41.0 | 75.0  |
| 2176 | IPI00115212.1 | 20920 | LFLEQIHVLENSLVLK            | 632.7057  | 3 | 23 |        | 0.0  | 23.0  |
| 2177 | IPI00115212.1 | 20920 | TDYDNFLMAHLINEK             | 912.9369  | 2 | 42 | y6     | 89.0 | 131.0 |
| 2178 | IPI00115212.1 | 20920 | TDYDNFLMAHLINEK             | 912.4339  | 2 | 60 | y8     | 90.2 | 150.2 |
| 2179 | IPI00128556.1 | 31852 | AAEAGADLVMLDNFKPEELHPTAATLK | 951.8214  | 3 | 59 | P y7   | 33.8 | 92.8  |
| 2180 | IPI00128556.1 | 31852 | DNHVVAAGSMER                | 429.2033  | 3 | 27 | y5     | 7.1  | 34.1  |
| 2181 | IPI00128556.1 | 31852 | DNHVVAAGSMER                | 643.3015  | 2 | 40 | y7     | 14.6 | 54.6  |
| 2182 | IPI00128556.1 | 31852 | GPAHLLLLGER                 | 400.5600  | 3 | 37 | y4     | 15.6 | 52.6  |
| 2183 | IPI00128556.1 | 31852 | GPAHLLLLGER                 | 600.3368  | 2 | 50 | y7     | 90.2 | 140.2 |
| 2184 | IPI00128556.1 | 31852 | LFAEGDTPVPHAR               | 470.5777  | 3 | 21 | P y4   | 41.0 | 62.0  |
| 2185 | IPI00128556.1 | 31852 | QAAGFSLK                    | 411.2293  | 2 | 26 |        | 0.0  | 26.0  |
| 2186 | IPI00128556.1 | 31852 | VALNTLAR                    | 429.2643  | 2 | 63 | y5     | 38.2 | 101.2 |
| 2187 | IPI00226430.1 | 42260 | AANEAGYFNEEMAPIEVK          | 992.4610  | 2 | 55 | y6     | 69.8 | 124.8 |
| 2188 | IPI00226430.1 | 42260 | AANEAGYFNEEMAPIEVK          | 992.4618  | 2 | 57 | y6     | 53.0 | 110.0 |
| 2189 | IPI00226430.1 | 42260 | DMDLIDVNEAFAPQFLSVQK        | 1141.0666 | 2 | 70 | P y8   | 58.1 | 128.1 |
| 2190 | IPI00129517.1 | 22226 | ATDLLLDDSLVSLFGNR           | 925.4901  | 2 | 41 | y5     | 7.1  | 48.1  |
| 2191 | IPI00129517.1 | 22226 | ATDLLLDDSLVSLFGNR           | 924.9870  | 2 | 47 | y4     | 15.6 | 62.6  |
| 2192 | IPI00129517.1 | 22226 | ATDLLLDDSLVSLFGNRR          | 1003.0392 | 2 | 25 |        | 0.0  | 25.0  |
| 2193 | IPI00129517.1 | 22226 | ATDLLLDDSLVSLFGNRR          | 669.0344  | 3 | 32 | b6     | 29.5 | 61.5  |
| 2194 | IPI00129517.1 | 22226 | ATDLLLDDSLVSLFGNRR          | 669.3632  | 3 | 43 | b6     | 25.4 | 68.4  |
| 2195 | IPI00129517.1 | 22226 | LLADPTGAFGK                 | 545.3006  | 2 | 35 | P y7   | 82.7 | 117.7 |
| 2196 | IPI00129517.1 | 22226 | RFSMVIDNGIVK                | 460.2551  | 3 | 34 | c b5   | 15.6 | 49.6  |
| 2197 | IPI00129517.1 | 22226 | THLPGFVEQAGALK              | 734.4061  | 2 | 39 |        | 0.0  | 39.0  |
| 2198 | IPI00129517.1 | 22226 | THLPGFVEQAGALK              | 489.9371  | 3 | 44 | y7     | 42.2 | 86.2  |
| 2199 | IPI00129517.1 | 22226 | VNLAELFK                    | 467.2740  | 2 | 43 | y6     | 97.9 | 140.9 |
| 2200 | IPI00169670.1 | 38003 | VLWTPQVLTNGVQFFR            | 953.5249  | 2 | 58 | c b4 P | 16.9 | 74.9  |
| 2201 | IPI00169670.1 | 38003 | VLWTPQVLTNGVQFFR            | 954.0160  | 2 | 70 |        | 0.0  | 70.0  |
| 2202 | IPI00169670.1 | 38003 | VLWTPQVLTNGVQFFR            | 953.5247  | 2 | 73 | y8     | 12.2 | 85.2  |
| 2203 | IPI00169670.1 | 38003 | VSPDGEQYGPSELK              | 738.8545  | 2 | 40 | P y5   | 57.1 | 97.1  |
| 2204 | IPI00230682.4 | 28183 | AVTEQGHELSNEER              | 799.8802  | 2 | 71 | y6     | 38.2 | 109.2 |
| 2205 | IPI00230682.4 | 28183 | EMQPThPIR                   | 554.7819  | 2 | 24 | y4     | 44.5 | 68.5  |
| 2206 | IPI00230682.4 | 28183 | TAFDEAIAELDTLNEESYK         | 1080.5090 | 2 | 58 | c b9   | 2.0  | 60.0  |
| 2207 | IPI00230682.4 | 28183 | YLSEVASGENK                 | 598.7947  | 2 | 45 | y9     | 52.8 | 97.8  |
| 2208 | IPI00132076.1 | 29705 | AVYQGGSSPVK                 | 595.3141  | 2 | 36 | y8     | 55.3 | 91.3  |
| 2209 | IPI00132076.1 | 29705 | AVYQGGSSPVKS                | 638.8302  | 2 | 56 | y9     | 42.2 | 98.2  |
| 2210 | IPI00132076.1 | 29705 | EWAMNVDGAK                  | 560.7582  | 2 | 33 | y6     | 95.7 | 128.7 |
| 2211 | IPI00132076.1 | 29705 | GQIMDAVIR                   | 501.7744  | 2 | 42 | y7     | 33.8 | 75.8  |

|      |               |       |                            |           |   |     |         |      |       |
|------|---------------|-------|----------------------------|-----------|---|-----|---------|------|-------|
| 2212 | IPI00132076.1 | 29705 | GTVLLADNVIVPGTPDFLAYVR     | 1166.1400 | 2 | 49  | P y8    | 12.9 | 61.9  |
| 2213 | IPI00132076.1 | 29705 | GTVLLADNVIVPGTPDFLAYVR     | 1166.1401 | 2 | 50  | P y8    | 5.4  | 55.4  |
| 2214 | IPI00132076.1 | 29705 | LLTMEINPDYAAITQQMLDFAGLQDK | 980.8240  | 3 | 41  | y6      | 25.4 | 66.4  |
| 2215 | IPI00381856.1 | 58285 | FNGTVK                     | 333.1844  | 2 | 23  | y5      | 44.5 | 67.5  |
| 2216 | IPI00381856.1 | 58285 | RVIISAPSADAPMFVMGVNHKK     | 790.4308  | 3 | 48  |         | 0.0  | 48.0  |
| 2217 | IPI00381856.1 | 58285 | TNSGSREGLEAK               | 625.3111  | 2 | 17  |         | 0.0  | 17.0  |
| 2218 | IPI00317902.1 | 28684 | LLANMVYQYK                 | 621.8362  | 2 | 72  | y5      | 75.6 | 147.6 |
| 2219 | IPI00317902.1 | 28684 | RGPGLYVDSEGNR              | 528.2588  | 3 | 19  | y6      | 16.9 | 35.9  |
| 2220 | IPI00317902.1 | 28684 | VSSDNVADLHDK               | 650.3123  | 2 | 80  | y4      | 44.5 | 124.5 |
| 2221 | IPI00120457.1 | 40898 | ELGHPEIGDAIAR              | 459.9089  | 3 | 16  |         | 0.0  | 16.0  |
| 2222 | IPI00120457.1 | 40898 | ELGHPEIGDAIAR              | 689.3594  | 2 | 25  | P y9    | 52.8 | 77.8  |
| 2223 | IPI00120457.1 | 40898 | EVLEYNALGGK                | 596.8143  | 2 | 49  | y7      | 77.6 | 126.6 |
| 2224 | IPI00120457.1 | 40898 | GLTVVQAFQELVEPK            | 829.9644  | 2 | 35  | y4      | 15.6 | 50.6  |
| 2225 | IPI00120457.1 | 40898 | GLTVVQAFQELVEPK            | 829.4610  | 2 | 50  | y4      | 15.6 | 65.6  |
| 2226 | IPI00120457.1 | 40898 | LDAYNQEK                   | 490.7382  | 2 | 31  | y6      | 53.0 | 84.0  |
| 2227 | IPI00120457.1 | 40898 | PGIGLDAINDALLLEASIYR       | 1058.0777 | 2 | 102 | c b9    | 11.6 | 113.6 |
| 2228 | IPI00120457.1 | 40898 | QILEENYGQK                 | 611.3095  | 2 | 29  | y6      | 65.2 | 94.2  |
| 2229 | IPI00120457.1 | 40898 | QILEENYGQKDPEK             | 564.2815  | 3 | 21  |         | 0.0  | 21.0  |
| 2230 | IPI00124223.1 | 28826 | IVVLLQR                    | 420.7869  | 2 | 26  | y5      | 27.2 | 53.2  |
| 2231 | IPI00124223.1 | 28826 | LEGFHTQISK                 | 580.3093  | 2 | 30  | y8      | 32.0 | 62.0  |
| 2232 | IPI00124223.1 | 28826 | NAYAVLYDIILK               | 698.4070  | 2 | 75  | y6      | 82.7 | 157.7 |
| 2233 | IPI00222430.3 | 9994  | AKWDSWNK                   | 345.5064  | 3 | 21  | y++7    | 18.5 | 39.5  |
| 2234 | IPI00222430.3 | 9994  | AKWDSWNK                   | 517.7566  | 2 | 25  | y6      | 65.2 | 90.2  |
| 2235 | IPI00222430.3 | 9994  | QATVGDVNTDRPGLLDLK         | 638.3455  | 3 | 17  | y++11   | 21.2 | 38.2  |
| 2236 | IPI00222430.3 | 9994  | QATVGDVNTDRPGLLDLK         | 638.3433  | 3 | 20  |         | 0.0  | 20.0  |
| 2237 | IPI00222430.3 | 9994  | QATVGDVNTDRPGLLDLK         | 638.0125  | 3 | 27  |         | 0.0  | 27.0  |
| 2238 | IPI00222430.3 | 9994  | QATVGDVNTDRPGLLDLK         | 638.0081  | 3 | 32  |         | 0.0  | 32.0  |
| 2239 | IPI00222430.3 | 9994  | QATVGDVNTDRPGLLDLK         | 957.0133  | 2 | 37  | y++14   | 4.7  | 41.7  |
| 2240 | IPI00222430.3 | 9994  | TQPTDEEMLIYSHFK            | 993.9675  | 2 | 37  |         | 0.0  | 37.0  |
| 2241 | IPI00222430.3 | 9994  | TQPTDEEMLIYSHFK            | 993.9678  | 2 | 58  | y7      | 46.8 | 104.8 |
| 2242 | IPI00222430.3 | 9994  | TQPTDEEMLIYSHFK            | 993.4746  | 2 | 83  | y5      | 38.2 | 121.2 |
| 2243 | IPI00222430.3 | 9994  | VDELKK                     | 366.2189  | 2 | 27  | y4      | 57.1 | 84.1  |
| 2244 | IPI00129164.1 | 28310 | ALAPQLAR                   | 420.2587  | 2 | 17  | P y5    | 82.7 | 99.7  |
| 2245 | IPI00129164.1 | 28310 | DMLYQVLAAEEPSVR            | 861.4332  | 2 | 37  | P y4    | 44.5 | 81.5  |
| 2246 | IPI00129164.1 | 28310 | DMLYQVLAAEEPSVR            | 574.2907  | 3 | 42  | P y4    | 57.1 | 99.1  |
| 2247 | IPI00129164.1 | 28310 | DMLYQVLAAEEPSVR            | 860.9339  | 2 | 42  | P y4    | 29.5 | 71.5  |
| 2248 | IPI00129164.1 | 28310 | LLSPGSVMLVSAR              | 665.3826  | 2 | 72  | c b10   | 23.8 | 95.8  |
| 2249 | IPI00129164.1 | 28310 | VLSYAPGPLDNDMQQQLAR        | 994.9981  | 2 | 40  | y8      | 22.4 | 62.4  |
| 2250 | IPI00129164.1 | 28310 | VLSYAPGPLDNDMQQQLAR        | 994.9981  | 2 | 51  | c b5 P  | 41.0 | 92.0  |
| 2251 | IPI00315452.4 | 33772 | EAQIFDYNEIPNFPQSTVQGHAGR   | 907.1028  | 3 | 51  | P y++11 | 5.6  | 56.6  |
| 2252 | IPI00315452.4 | 33772 | EAQIFDYNEIPNFPQSTVQGHAGR   | 907.1028  | 3 | 60  | y++15   | 58.9 | 118.9 |

|      |               |       |                                          |           |   |    |       |      |       |
|------|---------------|-------|------------------------------------------|-----------|---|----|-------|------|-------|
| 2253 | IPI00315452.4 | 33772 | LVFGLLNGR                                | 494.8011  | 2 | 55 | y7    | 49.6 | 104.6 |
| 2254 | IPI00315452.4 | 33772 | VFGFSLITNK                               | 563.3188  | 2 | 67 | y8    | 73.4 | 140.4 |
| 2255 | IPI00330685.4 | 41895 | APHLTHLR                                 | 315.5192  | 3 | 17 | y4    | 9.6  | 26.6  |
| 2256 | IPI00330685.4 | 41895 | APHLTHLR                                 | 472.7750  | 2 | 27 |       | 0.0  | 27.0  |
| 2257 | IPI00330685.4 | 41895 | EIVPVLVSSR                               | 549.8293  | 2 | 22 | P y7  | 33.8 | 55.8  |
| 2258 | IPI00330685.4 | 41895 | HGSNLEAMGK                               | 522.2504  | 2 | 45 | y8    | 32.0 | 77.0  |
| 2259 | IPI00330685.4 | 41895 | ILVTLLHTLER                              | 436.6064  | 3 | 27 |       | 0.0  | 27.0  |
| 2260 | IPI00330685.4 | 41895 | IVSWSQAGVEPSVMGVGPIPAIK                  | 1162.1324 | 2 | 47 | P y4  | 41.0 | 88.0  |
| 2261 | IPI00330685.4 | 41895 | KWQVSR                                   | 402.2301  | 2 | 26 | y5    | 38.2 | 64.2  |
| 2262 | IPI00330685.4 | 41895 | LKPYPFLDGTGTVTANATGMNDGAAAVVLMK          | 1077.2174 | 3 | 57 | y9    | 32.0 | 89.0  |
| 2263 | IPI00330685.4 | 41895 | TAIGSFNGALSTVPVHEMGTTVIK                 | 811.0977  | 3 | 20 | y7    | 6.2  | 26.2  |
| 2264 | IPI00330685.4 | 41895 | VAVLSQNR                                 | 443.7593  | 2 | 41 | y4    | 15.6 | 56.6  |
| 2265 | IPI00330685.4 | 41895 | VAVLSQNRAEHAQK                           | 517.6186  | 3 | 17 | y++11 | 22.4 | 39.4  |
| 2266 | IPI00124372.1 | 54449 | ERKDEIATVETINNGK                         | 606.3178  | 3 | 45 | y7    | 23.8 | 68.8  |
| 2267 | IPI00124372.1 | 54449 | EVNLAVENAK                               | 543.7933  | 2 | 44 | y6    | 14.6 | 58.6  |
| 2268 | IPI00124372.1 | 54449 | GGARVEPVDASGTEK                          | 491.5832  | 3 | 33 | y7    | 35.8 | 68.8  |
| 2269 | IPI00124372.1 | 54449 | GVKPITLLEGGK                             | 404.5836  | 3 | 44 |       | 0.0  | 44.0  |
| 2270 | IPI00124372.1 | 54449 | IMEMSAK                                  | 405.1985  | 2 | 25 | y5    | 53.0 | 78.0  |
| 2271 | IPI00124372.1 | 54449 | ISFTGSVPTGVK                             | 596.8332  | 2 | 33 |       | 0.0  | 33.0  |
| 2272 | IPI00124372.1 | 54449 | LGDPLEEDTR                               | 564.7990  | 2 | 80 | P y7  | 22.4 | 102.4 |
| 2273 | IPI00124372.1 | 54449 | MGPLINAPHLER                             | 449.9116  | 3 | 31 | c b5  | 8.5  | 39.5  |
| 2274 | IPI00124372.1 | 54449 | STGTFVVSQPLNYR                           | 806.4143  | 2 | 30 | y++11 | 11.6 | 41.6  |
| 2275 | IPI00128378.1 | 62246 | AGNLKPGDTIIPTSGNTGIGLALAAAVK             | 917.5098  | 3 | 43 | y11   | 26.5 | 69.5  |
| 2276 | IPI00128378.1 | 62246 | AGNLKPGDTIIPTSGNTGIGLALAAAVK             | 917.5096  | 3 | 46 | y9    | 32.0 | 78.0  |
| 2277 | IPI00128378.1 | 62246 | AGNLKPGDTIIPTSGNTGIGLALAAAVK             | 917.5100  | 3 | 47 | y11   | 25.5 | 72.5  |
| 2278 | IPI00128378.1 | 62246 | GFDQAPVVNESGAILGMVTLGNMLSSLLAGK          | 1030.8719 | 3 | 34 | b8    | 6.6  | 40.6  |
| 2279 | IPI00128378.1 | 62246 | GFDQAPVVNESGAILGMVTLGNMLSSLLAGK          | 1030.8715 | 3 | 34 | b5 P  | 25.4 | 59.4  |
| 2280 | IPI00128378.1 | 62246 | GFDQAPVVNESGAILGMVTLGNMLSSLLAGK          | 1030.8715 | 3 | 38 | b5 P  | 7.7  | 45.7  |
| 2281 | IPI00128378.1 | 62246 | IIGVDPEGSILAPEELNQTEQTAYEVEGIGYDFIPTVLDR | 1131.5493 | 4 | 17 | P y6  | 41.0 | 58.0  |
| 2282 | IPI00128378.1 | 62246 | SNDEDSFAFAR                              | 629.7702  | 2 | 61 | y4    | 15.6 | 76.6  |
| 2283 | IPI00111315.1 | 11369 | SAGTSLVNFSSLMNLEEK                       | 1038.0097 | 2 | 69 | y5    | 62.3 | 131.3 |
| 2284 | IPI00111315.1 | 11369 | SAGTSLVNFSSLMNLEEK                       | 1038.0103 | 2 | 74 | y6    | 13.7 | 87.7  |
| 2285 | IPI00111315.1 | 11369 | THEQLTPLVR                               | 597.3364  | 2 | 36 | y8    | 21.2 | 57.2  |
| 2286 | IPI00111315.1 | 11369 | TSEIQSQVK                                | 510.2722  | 2 | 43 | y7    | 35.8 | 78.8  |
| 2287 | IPI00125658.3 | 73323 | EGVFPGLIPILNSYLENMEVDVDTR                | 941.1451  | 3 | 24 | b8 P  | 5.4  | 29.4  |
| 2288 | IPI00125658.3 | 73323 | EGVFPGLIPILNSYLENMEVDVDTR                | 941.1450  | 3 | 37 | b8 P  | 12.2 | 49.2  |
| 2289 | IPI00125658.3 | 73323 | EGVFPGLIPILNSYLENMEVDVDTR                | 941.1453  | 3 | 40 | b8 P  | 5.4  | 45.4  |
| 2290 | IPI00125658.3 | 73323 | GLLSQGSPLSWEETQR                         | 894.9502  | 2 | 39 | y5    | 25.4 | 64.4  |
| 2291 | IPI00125658.3 | 73323 | LDFLIPLSK                                | 523.3183  | 2 | 44 | y5    | 69.8 | 113.8 |
| 2292 | IPI00125658.3 | 73323 | VQLLLNGGDVLETLQEK                        | 935.0202  | 2 | 70 | y5    | 44.5 | 114.5 |
| 2293 | IPI00125658.3 | 73323 | VVINVPFK                                 | 514.8289  | 2 | 25 | y6    | 38.2 | 63.2  |



|      |               |       |                                |           |   |    |       |      |       |
|------|---------------|-------|--------------------------------|-----------|---|----|-------|------|-------|
| 2294 | IPI00228253.1 | 41728 | AGHFDK                         | 337.6665  | 2 | 39 | c b5  | 49.1 | 88.1  |
| 2295 | IPI00228253.1 | 41728 | IDEFPR                         | 388.7004  | 2 | 29 | y5    | 29.5 | 58.5  |
| 2296 | IPI00228253.1 | 41728 | MNAGSDPVVIVSAAR                | 764.8932  | 2 | 47 |       | 0.0  | 47.0  |
| 2297 | IPI00125515.1 | 33330 | ESVQVPDDQDFR                   | 717.8338  | 2 | 19 | P y7  | 46.8 | 65.8  |
| 2298 | IPI00125515.1 | 33330 | NRDVITLR                       | 493.7906  | 2 | 47 | y6    | 14.6 | 61.6  |
| 2299 | IPI00125515.1 | 33330 | PAASTEPQGSRPALGR               | 532.2811  | 3 | 36 | y++13 | 42.2 | 78.2  |
| 2300 | IPI00125515.1 | 33330 | SSQFLAPK                       | 439.2427  | 2 | 34 | c b6  | 1.1  | 35.1  |
| 2301 | IPI00125515.1 | 33330 | SWLPMGADYIIMNYSVK              | 663.6603  | 3 | 46 | y7    | 49.6 | 95.6  |
| 2302 | IPI00125515.1 | 33330 | SWLPMGADYIIMNYSVK              | 994.4877  | 2 | 55 | y6    | 46.8 | 101.8 |
| 2303 | IPI00125515.1 | 33330 | SWLPMGADYIIMNYSVK              | 994.9858  | 2 | 56 | y6    | 49.6 | 105.6 |
| 2304 | IPI00331556.3 | 94820 | SNLAYDIVQLPTGLTGIK             | 952.5303  | 2 | 61 |       | 0.0  | 61.0  |
| 2305 | IPI00331556.3 | 94820 | SNLAYDIVQLPTGLTGIK             | 952.5300  | 2 | 62 | P y8  | 69.8 | 131.8 |
| 2306 | IPI00331556.3 | 94820 | TRFQESEERP                     | 469.5725  | 3 | 35 | c b5  | 53.0 | 88.0  |
| 2307 | IPI00331556.3 | 94820 | TSTVDLPIESQLLWQLDREMLGLYTENEGK | 1160.5932 | 3 | 25 | b6 P  | 0.7  | 25.7  |
| 2308 | IPI00331556.3 | 94820 | TSTVDLPIESQLLWQLDREMLGLYTENEGK | 1160.5936 | 3 | 27 | y6    | 7.1  | 34.1  |
| 2309 | IPI00331556.3 | 94820 | TSTVDLPIESQLLWQLDREMLGLYTENEGK | 1160.5937 | 3 | 56 |       | 0.0  | 56.0  |
| 2310 | IPI00226993.3 | 12010 | EAFQEALAAAGDK                  | 660.8297  | 2 | 84 | y5    | 57.1 | 141.1 |
| 2311 | IPI00226993.3 | 12010 | EAFQEALAAAGDK                  | 660.8296  | 2 | 89 | y6    | 53.0 | 142.0 |
| 2312 | IPI00318577.1 | 57202 | ALGKDDFTK                      | 497.7646  | 2 | 32 | y7    | 61.4 | 93.4  |
| 2313 | IPI00318577.1 | 57202 | FVAVTSTNAAK                    | 554.8038  | 2 | 38 | y9    | 66.6 | 104.6 |
| 2314 | IPI00318577.1 | 57202 | GSSLIEAFETWR                   | 698.3509  | 2 | 51 |       | 0.0  | 51.0  |
| 2315 | IPI00318577.1 | 57202 | IFNLYPK                        | 447.7583  | 2 | 41 | y6    | 69.8 | 110.8 |
| 2316 | IPI00318577.1 | 57202 | IPNGVNGVEDR                    | 585.2993  | 2 | 65 | y6    | 25.4 | 90.4  |
| 2317 | IPI00318577.1 | 57202 | MDENRFVAVTSTNAAK               | 585.6235  | 3 | 20 | y7    | 38.2 | 58.2  |
| 2318 | IPI00318577.1 | 57202 | RAGNVVYGEPIAAGLGTDGR           | 658.3472  | 3 | 45 | y5    | 14.6 | 59.6  |
| 2319 | IPI00318577.1 | 57202 | RAPYKGEVTTLK                   | 454.9298  | 3 | 33 | c b4  | 25.4 | 58.4  |
| 2320 | IPI00310240.1 | 76294 | DAYERDLESIDIIGDTSGHFQK         | 799.7063  | 3 | 26 |       | 0.0  | 26.0  |
| 2321 | IPI00310240.1 | 76294 | DAYERDLESIDIIGDTSGHFQK         | 799.7060  | 3 | 37 | y9    | 52.8 | 89.8  |
| 2322 | IPI00310240.1 | 76294 | ESILELITSR                     | 580.8300  | 2 | 44 | y4    | 6.6  | 50.6  |
| 2323 | IPI00310240.1 | 76294 | GSVHDFPEFDANQDAEALYTAMK        | 852.7157  | 3 | 38 | y7    | 46.8 | 84.8  |
| 2324 | IPI00310240.1 | 76294 | GSVHDFPEFDANQDAEALYTAMK        | 853.0505  | 3 | 49 |       | 0.0  | 49.0  |
| 2325 | IPI00310240.1 | 76294 | TLIEILATR                      | 515.3236  | 2 | 27 | y7    | 46.8 | 73.8  |
| 2326 | IPI00310240.1 | 76294 | WGTDEAQFIYILGNR                | 891.9465  | 2 | 55 | y6    | 5.9  | 60.9  |
| 2327 | IPI00111876.2 | 22551 | FSSETWQNLGTLQR                 | 833.9145  | 2 | 68 | y5    | 18.5 | 86.5  |
| 2328 | IPI00111876.2 | 22551 | GLLDFLQGLA                     | 1046.5906 | 1 | 43 | b9    | 11.0 | 54.0  |
| 2329 | IPI00111876.2 | 22551 | TPALIVYGDQDPMGSSSFQHLK         | 798.0622  | 3 | 42 | b5    | 7.1  | 49.1  |
| 2330 | IPI00131204.1 | 57115 | AMSQDGASQFQEVILQELELSVKK       | 893.7965  | 3 | 27 | b5    | 29.5 | 56.5  |
| 2331 | IPI00131204.1 | 57115 | GGTLTQYEGK                     | 527.2649  | 2 | 45 | y6    | 53.0 | 98.0  |
| 2332 | IPI00131204.1 | 57115 | IFNTNNLWISLGAVK                | 845.9714  | 2 | 99 | y6    | 49.6 | 148.6 |
| 2333 | IPI00131204.1 | 57115 | ILTAAASHEFEHTKK                | 571.6374  | 3 | 18 |       | 0.0  | 18.0  |
| 2334 | IPI00131204.1 | 57115 | IQRPPEDSIQPYEK                 | 567.2934  | 3 | 43 |       | 0.0  | 43.0  |

|      |               |        |                              |           |   |    |        |      |       |
|------|---------------|--------|------------------------------|-----------|---|----|--------|------|-------|
| 2335 | IPI00131204.1 | 57115  | IYTFNQSR                     | 514.7616  | 2 | 31 | y5     | 36.1 | 67.1  |
| 2336 | IPI00131204.1 | 57115  | NENTFLDLTVQQIEHLNK           | 719.7084  | 3 | 19 |        | 0.0  | 19.0  |
| 2337 | IPI00120864.1 | 32225  | AAIGDTLVQDIR                 | 636.3546  | 2 | 41 | y++10  | 49.6 | 90.6  |
| 2338 | IPI00120864.1 | 32225  | AEDGIVLDFPVYPTFPQDFHEVEDLIK  | 1045.5149 | 3 | 35 | b7     | 6.6  | 41.6  |
| 2339 | IPI00120864.1 | 32225  | AEDGIVLDFPVYPTFPQDFHEVEDLIK  | 1045.5178 | 3 | 35 | b8     | 32.0 | 67.0  |
| 2340 | IPI00120864.1 | 32225  | GLILTVK                      | 372.2550  | 2 | 23 | y5     | 69.8 | 92.8  |
| 2341 | IPI00120864.1 | 32225  | RAEDGIVLDFPVYPTFPQDFHEVEDLIK | 1097.5589 | 3 | 42 | b9     | 30.4 | 72.4  |
| 2342 | IPI00120864.1 | 32225  | TLEEDAHQQIAR                 | 470.9041  | 3 | 29 |        | 0.0  | 29.0  |
| 2343 | IPI00120864.1 | 32225  | TLEEDAHQQIAR                 | 705.8526  | 2 | 80 | y6     | 53.0 | 133.0 |
| 2344 | IPI00120864.1 | 32225  | VNTEPLPAIEK                  | 605.8371  | 2 | 24 | c b4 P | 16.9 | 40.9  |
| 2345 | IPI00134131.2 | 59715  | HSVNNNTYSQFQDEYSLEEV MK      | 850.3822  | 3 | 39 | y7     | 33.8 | 72.8  |
| 2346 | IPI00134131.2 | 59715  | HSVNNNTYSQFQDEYSLEEV MK      | 850.3823  | 3 | 47 | y7     | 33.8 | 80.8  |
| 2347 | IPI00134131.2 | 59715  | KLEEEGEQFVK                  | 668.3417  | 2 | 49 | y6     | 53.0 | 102.0 |
| 2348 | IPI00134131.2 | 59715  | LQNLQLQPGK                   | 569.8334  | 2 | 47 | c b7 P | 49.6 | 96.6  |
| 2349 | IPI00134131.2 | 59715  | MNPQSAFFQ GK                 | 627.8058  | 2 | 24 | y7     | 35.8 | 59.8  |
| 2350 | IPI00134131.2 | 59715  | RQVPGAK                      | 378.2301  | 2 | 30 | c b6   | 25.4 | 55.4  |
| 2351 | IPI00134131.2 | 59715  | WVINPSGGLISK                 | 635.8617  | 2 | 25 | y10    | 61.2 | 86.2  |
| 2352 | IPI00134131.2 | 59715  | YGLSAHPITPQMFGYAGK           | 646.6601  | 3 | 23 | c b9 P | 5.0  | 28.0  |
| 2353 | IPI00126194.1 | 167091 | AINYLISGYQR                  | 649.3544  | 2 | 58 | y4     | 57.1 | 115.1 |
| 2354 | IPI00126194.1 | 167091 | APFALQVNTLPLNFDK             | 894.9888  | 2 | 52 | P y6   | 69.8 | 121.8 |
| 2355 | IPI00126194.1 | 167091 | LLTDQAVDK                    | 501.7765  | 2 | 45 | y7     | 82.7 | 127.7 |
| 2356 | IPI00126194.1 | 167091 | QQNSDGGLLLTQDTVVALQALSK      | 802.0691  | 3 | 23 | y8     | 73.4 | 96.4  |
| 2357 | IPI00126194.1 | 167091 | SVIVEPEGIEK                  | 600.3302  | 2 | 30 | P y6   | 61.4 | 91.4  |
| 2358 | IPI00126194.1 | 167091 | TFHVNSG NR                   | 516.2553  | 2 | 18 | y6     | 25.4 | 43.4  |
| 2359 | IPI00126194.1 | 167091 | TVQGAFFGVPVYK                | 707.3837  | 2 | 42 | P y4   | 75.6 | 117.6 |
| 2360 | IPI00126194.1 | 167091 | VNTNYRPLPFGSQVLLVDEK         | 783.0879  | 3 | 26 |        | 0.0  | 26.0  |
| 2361 | IPI00126194.1 | 167091 | VNTNYRPLPFGSQVLLVDEK         | 783.0882  | 3 | 28 |        | 0.0  | 28.0  |
| 2362 | IPI00319992.1 | 72492  | RALSSQH QAR                  | 385.2113  | 3 | 48 | y4     | 15.6 | 63.6  |
| 2363 | IPI00319992.1 | 72492  | VEIANDQGNR                   | 614.8182  | 2 | 58 | y7     | 35.8 | 93.8  |
| 2364 | IPI00132655.1 | 25782  | EGLLTLGAK                    | 515.3012  | 2 | 54 | y6     | 46.8 | 100.8 |
| 2365 | IPI00132655.1 | 25782  | MTDSFTEQADQVTADV GK          | 972.4400  | 2 | 67 | y6     | 53.0 | 120.0 |
| 2366 | IPI00132655.1 | 25782  | QSMWTSTISSHLATK              | 559.9477  | 3 | 16 | y7     | 33.8 | 49.8  |
| 2367 | IPI00132655.1 | 25782  | RPNSGSLIQVTTD GKTELTPAYF     | 865.7883  | 3 | 22 | P y4   | 29.5 | 51.5  |
| 2368 | IPI00132655.1 | 25782  | RVLVYGGR                     | 460.2771  | 2 | 50 | y6     | 13.7 | 63.7  |
| 2369 | IPI00132655.1 | 25782  | VLVYGGR                      | 382.2267  | 2 | 33 | y4     | 41.0 | 74.0  |
| 2370 | IPI00331490.5 | 41028  | ALQTTYGTNAPR                 | 646.8335  | 2 | 58 | y6     | 38.2 | 96.2  |
| 2371 | IPI00331490.5 | 41028  | FYAYNPLAGLLTGK               | 793.4254  | 2 | 47 | P y10  | 48.5 | 95.5  |
| 2372 | IPI00331490.5 | 41028  | RMDASASAASVR                 | 611.3045  | 2 | 57 | y9     | 29.0 | 86.0  |
| 2373 | IPI00331490.5 | 41028  | VDLFY LHAPDHSTPVEETLR        | 585.5525  | 4 | 21 |        | 0.0  | 21.0  |
| 2374 | IPI00331490.5 | 41028  | WMYHHSQ LQGTR                | 772.3738  | 2 | 43 | y8     | 44.3 | 87.3  |
| 2375 | IPI00271562.2 | 40842  | SLK PDSIR                    | 458.2667  | 2 | 18 | P y5   | 38.2 | 56.2  |

|      |               |       |                        |           |   |    |        |       |       |
|------|---------------|-------|------------------------|-----------|---|----|--------|-------|-------|
| 2376 | IPI00314467.3 | 23235 | PYTLMSMVANLLYEK        | 886.9523  | 2 | 87 | y4     | 83.9  | 170.9 |
| 2377 | IPI00407543.1 | 21532 | EILVGDVGTVDPPYTTFFVK   | 1099.0588 | 2 | 95 | P y7   | 65.2  | 160.2 |
| 2378 | IPI00407543.1 | 21532 | ESKKEDLVFIFWAPENAPLK   | 788.0876  | 3 | 30 | P y7   | 77.6  | 107.6 |
| 2379 | IPI00407543.1 | 21532 | MIYASSK                | 400.2047  | 2 | 18 | y5     | 53.0  | 71.0  |
| 2380 | IPI00407543.1 | 21532 | YALYDATYETK            | 669.3250  | 2 | 46 | y8     | 73.4  | 119.4 |
| 2381 | IPI00127942.1 | 18852 | HEYQANGPEDLNR          | 514.9028  | 3 | 49 |        | 0.0   | 49.0  |
| 2382 | IPI00127942.1 | 18852 | HEYQANGPEDLNR          | 771.8532  | 2 | 61 | c b7 P | 1.4   | 62.4  |
| 2383 | IPI00127942.1 | 18852 | HFVGMLEPK              | 529.2787  | 2 | 27 | y8     | 44.3  | 71.3  |
| 2384 | IPI00127942.1 | 18852 | YALYDASFETK            | 654.3172  | 2 | 53 | y7     | 49.6  | 102.6 |
| 2385 | gij547749     | 59711 | ELTTEIDNNIEQISSYK      | 998.9934  | 2 | 63 | y7     | 44.3  | 107.3 |
| 2386 | gij547749     | 59711 | SLLEGE GSSGGGGR        | 631.8023  | 2 | 67 | y10    | 27.7  | 94.7  |
| 2387 | gij547749     | 59711 | VTMQNLNDR              | 545.7694  | 2 | 48 | y7     | 23.8  | 71.8  |
| 2388 | IPI00222515.1 | 47749 | EQSILELGSLLAK          | 700.9069  | 2 | 46 | y6     | 41.0  | 87.0  |
| 2389 | IPI00222515.1 | 47749 | IMLNTPEDVQALVSGK       | 857.9546  | 2 | 88 | c b5 P | 41.0  | 129.0 |
| 2390 | IPI00222515.1 | 47749 | LYDNLLEQNLIR           | 752.4115  | 2 | 48 | y7     | 33.8  | 81.8  |
| 2391 | IPI00331146.3 | 26125 | IVPVEITISLLK           | 662.9268  | 2 | 37 |        | 0.0   | 37.0  |
| 2392 | IPI00331146.3 | 26125 | IVPVEITISLLK           | 662.9249  | 2 | 43 | y4     | 41.0  | 84.0  |
| 2393 | IPI00331146.3 | 26125 | NPDSQY GELIEK          | 696.8443  | 2 | 68 | y6     | 53.0  | 121.0 |
| 2394 | IPI00331146.3 | 26125 | RIQTYLESTKPIIDL YEEMGK | 843.4431  | 3 | 26 | b6     | 20.6  | 46.6  |
| 2395 | IPI00331146.3 | 26125 | RIQTYLESTKPIIDL YEEMGK | 843.1074  | 3 | 34 | b6     | 6.6   | 40.6  |
| 2396 | IPI00344912.1 | 46871 | KLSVSQVVHK             | 375.5648  | 3 | 33 | y4     | 16.9  | 49.9  |
| 2397 | IPI00344912.1 | 46871 | KLSVSQVVHK             | 562.8426  | 2 | 42 | y8     | 30.4  | 72.4  |
| 2398 | IPI00344912.1 | 46871 | MQQVEASLQPETLRK        | 586.6455  | 3 | 28 | P y6   | 5.9   | 33.9  |
| 2399 | IPI00344912.1 | 46871 | MQQVEASLQPETLRK        | 879.9645  | 2 | 53 | P y6   | 38.2  | 91.2  |
| 2400 | IPI00344912.1 | 46871 | NIVFSPLSISAALALVSLGAK  | 691.4100  | 3 | 21 | y5     | 53.0  | 74.0  |
| 2401 | IPI00344912.1 | 46871 | NIVFSPLSISAALALVSLGAK  | 691.4099  | 3 | 22 | y5     | 89.0  | 111.0 |
| 2402 | IPI00344912.1 | 46871 | TLFSSQIEELNLPK         | 809.9367  | 2 | 40 | y7     | 23.8  | 63.8  |
| 2403 | IPI00344912.1 | 46871 | TLFSSQIEELNLPK         | 809.9367  | 2 | 62 | y7     | 32.0  | 94.0  |
| 2404 | IPI00408961.1 | 33053 | DLGTQLAPIIQEFFHSEQYR   | 798.4030  | 3 | 19 | b6     | 7.1   | 26.1  |
| 2405 | IPI00408961.1 | 33053 | IMFVGGPNTRK            | 407.2256  | 3 | 17 | y7     | 0.2   | 17.2  |
| 2406 | IPI00408961.1 | 33053 | IMFVGGPNTRK            | 610.3350  | 2 | 25 | y9     | 11.6  | 36.6  |
| 2407 | IPI00408961.1 | 33053 | LMHQEQLK               | 342.8516  | 3 | 18 |        | 0.0   | 18.0  |
| 2408 | IPI00114628.1 | 30068 | DYLTTYYSFHS GPVAEQEIVK | 816.3975  | 3 | 40 | y6     | 13.7  | 53.7  |
| 2409 | IPI00114628.1 | 30068 | DYLTTYYSFHS GPVAEQEIVK | 816.7326  | 3 | 47 | y6     | 35.8  | 82.8  |
| 2410 | IPI00114628.1 | 30068 | EIIVTDYTPQNLQELQK      | 1017.0364 | 2 | 43 | y++14  | 10.1  | 53.1  |
| 2411 | IPI00114628.1 | 30068 | EIIVTDYTPQNLQELQK      | 1017.0364 | 2 | 45 | c b8 P | 5.6   | 50.6  |
| 2412 | IPI00114628.1 | 30068 | FQH YMVGP K            | 553.7765  | 2 | 28 | y7     | 108.8 | 136.8 |
| 2413 | IPI00114628.1 | 30068 | FSGVYLEK               | 471.7505  | 2 | 28 | y6     | 57.1  | 85.1  |
| 2414 | IPI00114628.1 | 30068 | KFSGVYLEK              | 535.7985  | 2 | 33 | y7     | 33.8  | 66.8  |
| 2415 | IPI00114628.1 | 30068 | LAGLLKPGGHLVTLVTLR     | 465.2968  | 4 | 18 |        | 0.0   | 18.0  |
| 2416 | IPI00114628.1 | 30068 | VYIGGEDY EK            | 586.7768  | 2 | 29 | y7     | 65.2  | 94.2  |

|      |               |       |                                |           |   |    |       |      |       |
|------|---------------|-------|--------------------------------|-----------|---|----|-------|------|-------|
| 2417 | IPI00116498.1 | 27925 | FLIPNASQPESK                   | 665.8574  | 2 | 42 | P y9  | 81.7 | 123.7 |
| 2418 | IPI00116498.1 | 27925 | GIVDQSQQAYQEAFEISKK            | 724.0311  | 3 | 21 |       | 0.0  | 21.0  |
| 2419 | IPI00116498.1 | 27925 | SVTEQGAELSNEER                 | 774.8674  | 2 | 59 | y5    | 15.6 | 74.6  |
| 2420 | IPI00116498.1 | 27925 | VVSSIEQK                       | 445.2534  | 2 | 22 | y6    | 53.0 | 75.0  |
| 2421 | IPI00116498.1 | 27925 | YLAEVAAGDDKK                   | 640.3297  | 2 | 48 | y8    | 73.4 | 121.4 |
| 2422 | IPI00126184.4 | 56740 | FSSSTFEQVNLVK                  | 807.4123  | 2 | 68 | y7    | 5.9  | 73.9  |
| 2423 | IPI00126184.4 | 56740 | FSSSTFEQVNLVK                  | 807.4120  | 2 | 87 | y8    | 21.2 | 108.2 |
| 2424 | IPI00116279.1 | 60042 | AFADALEVIPMALSENSGMNPIQTMTEVR  | 1046.5118 | 3 | 24 | b9 P  | 19.2 | 43.2  |
| 2425 | IPI00116279.1 | 60042 | MMVDKDGDTVITNDGATILSMMDVDHQIAK | 817.1374  | 4 | 21 |       | 0.0  | 21.0  |
| 2426 | IPI00116279.1 | 60042 | SQDDEIGDGTGTVVLAGALLEEAQQLDR   | 1038.8571 | 3 | 39 | y6    | 1.3  | 40.3  |
| 2427 | IPI00116279.1 | 60042 | VLVDINNPEPLIQTAK               | 882.4999  | 2 | 76 | P y9  | 52.8 | 128.8 |
| 2428 | IPI00350785.3 | 36132 | VIHNNFGIVEGLMTTVHAITATQK       | 871.4569  | 3 | 22 | c b8  | 1.8  | 23.8  |
| 2429 | IPI00350785.3 | 36132 | VIHNNFGIVEGLMTTVHAITATQK       | 649.6027  | 4 | 33 |       | 0.0  | 33.0  |
| 2430 | IPI00350785.3 | 36132 | VIHNNFGIVEGLMTTVHAITATQK       | 866.1255  | 3 | 38 | y9    | 44.3 | 82.3  |
| 2431 | IPI00350785.3 | 36132 | VIHNNFGIVEGLMTTVHAITATQK       | 649.5972  | 4 | 38 | y++11 | 61.4 | 99.4  |
| 2432 | IPI00350785.3 | 36132 | YDNSLK                         | 739.3638  | 1 | 20 | y4    | 62.3 | 82.3  |
| 2433 | IPI00313296.1 | 51495 | DISSAVQANPALTELSLR             | 943.5071  | 2 | 54 | P y9  | 29.0 | 83.0  |
| 2434 | IPI00313296.1 | 51495 | DISSAVQANPALTELSLR             | 943.5071  | 2 | 56 | P y9  | 61.2 | 117.2 |
| 2435 | IPI00313296.1 | 51495 | DISSAVQANPALTELSLR             | 943.0060  | 2 | 78 | P y9  | 29.0 | 107.0 |
| 2436 | IPI00118892.4 | 70732 | FSLVGIAGQDLNEG NR              | 845.4306  | 2 | 75 | y5    | 27.2 | 102.2 |
| 2437 | IPI00118892.4 | 70732 | MINLSVPTIDER                   | 752.3803  | 2 | 30 | P y7  | 61.4 | 91.4  |
| 2438 | IPI00118892.4 | 70732 | VNDDIIVNWVNTTLK                | 872.9683  | 2 | 60 | y5    | 53.0 | 113.0 |
| 2439 | IPI00331644.3 | 28700 | AVENSSTAIGIR                   | 609.3281  | 2 | 71 | c b9  | 5.2  | 76.2  |
| 2440 | IPI00331644.3 | 28700 | DGVVFGVEK                      | 475.2536  | 2 | 27 | y6    | 82.7 | 109.7 |
| 2441 | IPI00331644.3 | 28700 | GRHEIVPK                       | 312.5191  | 3 | 36 | c b5  | 23.4 | 59.4  |
| 2442 | IPI00331644.3 | 28700 | IYIVHDEVK                      | 410.2359  | 3 | 23 |       | 0.0  | 23.0  |
| 2443 | IPI00331644.3 | 28700 | RLFNVDR                        | 460.2590  | 2 | 27 | c b6  | 23.8 | 50.8  |
| 2444 | IPI00331644.3 | 28700 | SLADIAREEASNFR                 | 790.3971  | 2 | 27 | y5    | 27.2 | 54.2  |
| 2445 | IPI00331644.3 | 28700 | SLADIAREEASNFR                 | 526.9348  | 3 | 31 | y++9  | 25.4 | 56.4  |
| 2446 | IPI00331644.3 | 28700 | SLADIAREEASNFR                 | 789.8973  | 2 | 45 | y7    | 23.8 | 68.8  |
| 2447 | IPI00331644.3 | 28700 | SNFGYNIPLK                     | 576.8069  | 2 | 46 | y7    | 69.8 | 115.8 |
| 2448 | IPI00130530.1 | 35706 | LLDAAGANLR                     | 507.2909  | 2 | 74 | y5    | 27.2 | 101.2 |
| 2449 | IPI00130530.1 | 35706 | LSDRVNKK                       | 480.7771  | 2 | 34 | c b6  | 41.0 | 75.0  |
| 2450 | IPI00130530.1 | 35706 | TRNTMSLLAANNLLAGLRGEAMPSELKL   | 747.4064  | 4 | 19 | y++13 | 6.2  | 25.2  |
| 2451 | IPI00130530.1 | 35706 | VFVTGPLPAEGR                   | 621.8459  | 2 | 37 | P y7  | 13.7 | 50.7  |
| 2452 | IPI00109142.1 | 35569 | AFSGYLGPDSEK                   | 635.8010  | 2 | 55 | y7    | 22.4 | 77.4  |
| 2453 | IPI00109142.1 | 35569 | KIPVVFR                        | 429.7820  | 2 | 24 | P y5  | 97.9 | 121.9 |
| 2454 | IPI00109142.1 | 35569 | LQEGYDHSYYFIATFIADHIR          | 854.0829  | 3 | 29 | y6    | 25.4 | 54.4  |
| 2455 | IPI00109142.1 | 35569 | LQEGYDHSYYFIATFIADHIR          | 854.0828  | 3 | 32 | y8    | 33.8 | 65.8  |
| 2456 | IPI00109142.1 | 35569 | MYSYVTEELPQLINANFPVDPQR        | 909.1169  | 3 | 19 | P y6  | 14.6 | 33.6  |
| 2457 | IPI00109142.1 | 35569 | MYSYVTEELPQLINANFPVDPQR        | 909.1169  | 3 | 30 | y4    | 20.6 | 50.6  |

|      |               |        |                                        |           |   |    |       |      |       |
|------|---------------|--------|----------------------------------------|-----------|---|----|-------|------|-------|
| 2458 | IPI00109142.1 | 35569  | MYSYVTEELPQLINANFPVDPQR                | 909.1166  | 3 | 40 |       | 0.0  | 40.0  |
| 2459 | IPI00109142.1 | 35569  | SGYQQAASEHGLVVIAPDTSPR                 | 762.0508  | 3 | 16 | P y6  | 23.8 | 39.8  |
| 2460 | IPI00109142.1 | 35569  | VFEHSSVELK                             | 587.8090  | 2 | 38 | c b8  | 22.4 | 60.4  |
| 2461 | IPI00128518.1 | 44051  | ELLEVVNK                               | 472.2771  | 2 | 39 |       | 0.0  | 39.0  |
| 2462 | IPI00128518.1 | 44051  | FVIGGPQGDAVGTGRK                       | 520.2831  | 3 | 31 | y++12 | 22.4 | 53.4  |
| 2463 | IPI00128518.1 | 44051  | HIGYDDSAK                              | 503.2358  | 2 | 33 | y7    | 49.6 | 82.6  |
| 2464 | IPI00128518.1 | 44051  | IADLRR                                 | 372.2298  | 2 | 26 |       | 0.0  | 26.0  |
| 2465 | IPI00128518.1 | 44051  | IIVDTYGGWGAHGGGAFSGK                   | 650.6629  | 3 | 32 | y++17 | 75.5 | 107.5 |
| 2466 | IPI00128518.1 | 44051  | KPIYQK                                 | 388.7369  | 2 | 28 | P y5  | 27.2 | 55.2  |
| 2467 | IPI00128518.1 | 44051  | NFDLRPGVIVR                            | 643.3762  | 2 | 20 |       | 0.0  | 20.0  |
| 2468 | IPI00128518.1 | 44051  | SEFPWEVPK                              | 559.7843  | 2 | 31 | P y6  | 89.0 | 120.0 |
| 2469 | IPI00128518.1 | 44051  | SGVLPWLRPDSK                           | 677.8767  | 2 | 31 | y5    | 25.4 | 56.4  |
| 2470 | IPI00128518.1 | 44051  | TERELLEVVNK                            | 665.3774  | 2 | 30 | c b7  | 5.9  | 35.9  |
| 2471 | IPI00128518.1 | 44051  | TQVTVQYMQDNGAVIPVR                     | 1010.5232 | 2 | 52 | y5    | 13.7 | 65.7  |
| 2472 | IPI00128518.1 | 44051  | YLDEDTVYHLQPSGR                        | 598.2890  | 3 | 34 | y++11 | 58.1 | 92.1  |
| 2473 | IPI00128518.1 | 44051  | YLDEDTVYHLQPSGR                        | 598.6233  | 3 | 35 | P y4  | 16.9 | 51.9  |
| 2474 | IPI00129096.1 | 30437  | ELDSNPFASLVFYWEPLNR                    | 1149.5692 | 2 | 46 | y5    | 8.5  | 54.5  |
| 2475 | IPI00129096.1 | 30437  | ELDSNPFASLVFYWEPLNR                    | 1149.5697 | 2 | 49 |       | 0.0  | 49.0  |
| 2476 | IPI00129096.1 | 30437  | KNEELGQLYQDQEVPKPEYWGGYILYPQVMEFWQGQTN | 1191.5784 | 4 | 26 | y5    | 6.2  | 32.2  |
| 2477 | IPI00129096.1 | 30437  | SSQIGAVVSR                             | 502.2803  | 2 | 63 | y6    | 89.0 | 152.0 |
| 2478 | IPI00123223.1 | 166460 | AVDQSVLLKPESELSPSWIYNLPGMQQNK          | 1129.2562 | 3 | 43 | P y7  | 46.8 | 89.8  |
| 2479 | IPI00123223.1 | 166460 | DGSYSFAGDQNGEREGNTWLTAFLK              | 955.1192  | 3 | 45 | y7    | 22.4 | 67.4  |
| 2480 | IPI00123223.1 | 166460 | MLRPLNELLPLAYIEDPKK                    | 564.3239  | 4 | 23 | b7    | 5.9  | 28.9  |
| 2481 | IPI00123223.1 | 166460 | NLFDELVLDK                             | 603.3254  | 2 | 46 | y8    | 90.2 | 136.2 |
| 2482 | IPI00123223.1 | 166460 | SSGSLFNAMK                             | 578.2766  | 2 | 44 | y6    | 22.4 | 66.4  |
| 2483 | IPI00123223.1 | 166460 | YMLVPSQLYTETPEK                        | 949.9861  | 2 | 36 | c b4  | 20.6 | 56.6  |
| 2484 | IPI00109122.1 | 28020  | ALLEVVQSGGK                            | 550.8196  | 2 | 65 | y8    | 46.8 | 111.8 |
| 2485 | IPI00109122.1 | 28020  | LTVEDPVTVEYITR                         | 817.9353  | 2 | 76 | y5    | 25.4 | 101.4 |
| 2486 | IPI00307837.3 | 51065  | EVSTYIK                                | 420.2290  | 2 | 23 | y5    | 44.5 | 67.5  |
| 2487 | IPI00307837.3 | 51065  | EVSTYIKK                               | 484.2766  | 2 | 23 |       | 0.0  | 23.0  |
| 2488 | IPI00307837.3 | 51065  | IGGIGTVPVGR                            | 513.3093  | 2 | 53 | P y4  | 57.1 | 110.1 |
| 2489 | IPI00307837.3 | 51065  | KLEDGPK                                | 393.7218  | 2 | 16 | y6    | 29.5 | 45.5  |
| 2490 | IPI00307837.3 | 51065  | MDSTEPPYSQK                            | 641.7854  | 2 | 33 | P y6  | 69.8 | 102.8 |
| 2491 | IPI00307837.3 | 51065  | QTVAVGVK                               | 457.7875  | 2 | 23 |       | 0.0  | 23.0  |
| 2492 | IPI00307837.3 | 51065  | RYEEIVK                                | 468.7615  | 2 | 26 | b5    | 38.2 | 64.2  |
| 2493 | IPI00307837.3 | 51065  | STTTGHLYK                              | 560.8038  | 2 | 42 | y6    | 57.1 | 99.1  |
| 2494 | IPI00307837.3 | 51065  | VETGVLKPGMVVTFAPVNVTEVK                | 839.4698  | 3 | 17 | b7 P  | 23.8 | 40.8  |
| 2495 | IPI00307837.3 | 51065  | YYVTIIDAPGHR                           | 702.8708  | 2 | 57 | y7    | 46.8 | 103.8 |
| 2496 | IPI00408378.1 | 29720  | TAFDEAIAELDTLNEDSYK                    | 1073.4983 | 2 | 72 | y6    | 69.8 | 141.8 |
| 2497 | IPI00408378.1 | 29720  | TAFDEAIAELDTLNEDSYKDSTLIMQLLR          | 1106.2123 | 3 | 29 | y++16 | 31.7 | 60.7  |
| 2498 | IPI00115850.1 | 26615  | AELGIPLEEVDLNEMDYLTR                   | 1161.0765 | 2 | 45 | y7    | 15.6 | 60.6  |

|      |               |       |                              |           |   |    |        |      |       |
|------|---------------|-------|------------------------------|-----------|---|----|--------|------|-------|
| 2499 | IPI00115850.1 | 26615 | AFSVFLFNTENK                 | 708.8627  | 2 | 66 | y6     | 49.6 | 115.6 |
| 2500 | IPI00115850.1 | 26615 | NVTLNPDNEIK                  | 677.3560  | 2 | 54 | P y7   | 61.4 | 115.4 |
| 2501 | IPI00118344.1 | 55482 | IFDANTKPNLNLQVLSNPEFLAEGTAIK | 1020.2124 | 3 | 57 |        | 0.0  | 57.0  |
| 2502 | IPI00118344.1 | 55482 | VLIGGETPEGQK                 | 671.8475  | 2 | 44 | P y5   | 53.0 | 97.0  |
| 2503 | IPI00118344.1 | 55482 | VTVVDVNEAR                   | 551.2984  | 2 | 62 | y6     | 25.4 | 87.4  |
| 2504 | IPI00314225.2 | 68619 | QEAFLNPAIGPEGLSGSSR          | 1015.5273 | 2 | 72 | y10    | 27.7 | 99.7  |
| 2505 | IPI00314225.2 | 68619 | VIPTALLSLLLR                 | 654.9353  | 2 | 61 |        | 0.0  | 61.0  |
| 2506 | IPI00340989.2 | 33744 | ENIQVFELPSEDMK               | 977.9597  | 2 | 46 | P y6   | 41.0 | 87.0  |
| 2507 | IPI00340989.2 | 33744 | ENIQVFELPSEDMK               | 978.4589  | 2 | 50 | P y6   | 53.0 | 103.0 |
| 2508 | IPI00340989.2 | 33744 | HIDTAYVYQTENHVQAIR           | 739.3683  | 3 | 50 | y++16  | 32.9 | 82.9  |
| 2509 | IPI00340989.2 | 33744 | ILNKPGLK                     | 441.7925  | 2 | 30 | P y4   | 83.9 | 113.9 |
| 2510 | IPI00340989.2 | 33744 | RSPAQIALR                    | 506.3064  | 2 | 20 | c b8   | 12.2 | 32.2  |
| 2511 | IPI00340989.2 | 33744 | SIGVSNFNRSR                  | 540.7753  | 2 | 40 | y6     | 53.0 | 93.0  |
| 2512 | IPI00133066.1 | 53261 | LQEVITLLSLEK                 | 757.9459  | 2 | 68 | y5     | 32.3 | 100.3 |
| 2513 | IPI00133066.1 | 53261 | SRVVEHNIR                    | 370.5442  | 3 | 30 | c b5   | 25.4 | 55.4  |
| 2514 | IPI00116055.1 | 25588 | DGNLMFDQVPMVEIDGMK           | 1020.4691 | 2 | 32 | y6     | 49.6 | 81.6  |
| 2515 | IPI00121514.2 | 66313 | AMADPEVQQIMSDPAMR            | 945.9347  | 2 | 55 | P y4   | 44.5 | 99.5  |
| 2516 | IPI00121514.2 | 66313 | DPQALSEHLK                   | 569.2990  | 2 | 34 | y7     | 33.8 | 67.8  |
| 2517 | IPI00121514.2 | 66313 | FMNPFNLPNLYQK                | 813.4119  | 2 | 40 | P y6   | 53.0 | 93.0  |
| 2518 | IPI00121514.2 | 66313 | HEANNLQK                     | 533.7855  | 2 | 39 | y7     | 33.8 | 72.8  |
| 2519 | IPI00121514.2 | 66313 | LAYINPDLALEEK                | 744.9001  | 2 | 30 | P y8   | 42.2 | 72.2  |
| 2520 | IPI00121514.2 | 66313 | RTYEEGLK                     | 498.2621  | 2 | 28 | b5     | 27.2 | 55.2  |
| 2521 | IPI00121514.2 | 66313 | SLAEHR                       | 356.6907  | 2 | 22 | y4     | 27.2 | 49.2  |
| 2522 | IPI00131459.1 | 17311 | DRPFFTGLVK                   | 590.3296  | 2 | 21 |        | 0.0  | 21.0  |
| 2523 | IPI00131459.1 | 17311 | EISLWFQPEELVEYK              | 955.9833  | 2 | 25 | c b7 P | 38.2 | 63.2  |
| 2524 | IPI00131459.1 | 17311 | EISLWFQPEELVEYK              | 955.9836  | 2 | 33 |        | 0.0  | 33.0  |
| 2525 | IPI00131459.1 | 17311 | FLQASEDLLK                   | 582.3195  | 2 | 41 | y7     | 77.6 | 118.6 |
| 2526 | IPI00131459.1 | 17311 | YMHSGPVVAMVWEGLNVVK          | 706.3634  | 3 | 19 | y8     | 40.2 | 59.2  |
| 2527 | IPI00131459.1 | 17311 | YMHSGPVVAMVWEGLNVVK          | 706.3634  | 3 | 25 | y6     | 53.0 | 78.0  |
| 2528 | IPI00133206.1 | 49690 | AMEVDERPTEQYSDIGGLDK         | 752.0169  | 3 | 26 |        | 0.0  | 26.0  |
| 2529 | IPI00133206.1 | 49690 | LAGPQLVQMFIDGAK              | 822.9426  | 2 | 41 | y5     | 38.2 | 79.2  |
| 2530 | IPI00133206.1 | 49690 | MATVWDEAEQDGIGEEVLK          | 1061.0003 | 2 | 47 | y++17  | 14.9 | 61.9  |
| 2531 | IPI00133206.1 | 49690 | QTYFLPVIGLVDAEK              | 846.9654  | 2 | 37 | y7     | 22.4 | 59.4  |
| 2532 | IPI00133206.1 | 49690 | QTYFLPVIGLVDAEK              | 846.9653  | 2 | 49 |        | 0.0  | 49.0  |
| 2533 | IPI00129528.1 | 36860 | ENPSANYTTMMK                 | 693.8069  | 2 | 44 | y7     | 73.4 | 117.4 |
| 2534 | IPI00129528.1 | 36860 | RVPFMELIIPGITNGVEMLNNMPSPR   | 976.5128  | 3 | 26 | y5     | 49.6 | 75.6  |
| 2535 | IPI00129528.1 | 36860 | RVPFMELIIPGITNGVEMLNNMPSPR   | 976.5125  | 3 | 34 | y5     | 18.5 | 52.5  |
| 2536 | IPI00129528.1 | 36860 | RVPFMELIIPGITNGVEMLNNMPSPR   | 976.1781  | 3 | 38 | y5     | 25.4 | 63.4  |
| 2537 | IPI00129528.1 | 36860 | SGTTWVSEILDLIYNGDAEK         | 1163.5722 | 2 | 63 | y8     | 66.6 | 129.6 |
| 2538 | IPI00122657.1 | 37608 | ENFQIFDFSLTEEMKDIDALNK       | 926.4398  | 3 | 17 |        | 0.0  | 17.0  |
| 2539 | IPI00122657.1 | 37608 | ENFQIFDFSLTEEMKDIDALNK       | 926.7734  | 3 | 18 |        | 0.0  | 18.0  |

|      |               |       |                                      |           |   |    |        |      |       |
|------|---------------|-------|--------------------------------------|-----------|---|----|--------|------|-------|
| 2540 | IPI00122657.1 | 37608 | LDYIDLIIELPMAFKPGK                   | 747.0746  | 3 | 20 |        | 0.0  | 20.0  |
| 2541 | IPI00122657.1 | 37608 | LWNTEHVSPMVLPALER                    | 664.6837  | 3 | 29 | P y5   | 69.8 | 98.8  |
| 2542 | IPI00122657.1 | 37608 | MNLSAAHHQISLSDGNNIPLIGLGTYS DPRPVPVK | 928.9791  | 4 | 36 | P y7   | 23.8 | 59.8  |
| 2543 | IPI00122657.1 | 37608 | MNLSAAHHQISLSDGNNIPLIGLGTYS DPRPVPVK | 929.2300  | 4 | 38 |        | 0.0  | 38.0  |
| 2544 | IPI00122657.1 | 37608 | QLELILNKPGK                          | 683.4336  | 2 | 30 | y7     | 33.8 | 63.8  |
| 2545 | IPI00122657.1 | 37608 | TQAQIVLR                             | 464.7822  | 2 | 42 | y6     | 38.2 | 80.2  |
| 2546 | IPI00126048.1 | 43124 | ETIEDVEEMLNNLPGVTSVHSR               | 824.0722  | 3 | 77 | P y9   | 20.1 | 97.1  |
| 2547 | IPI00126048.1 | 43124 | QMTDPNVALTFLEK                       | 803.9092  | 2 | 42 | y7     | 22.4 | 64.4  |
| 2548 | IPI00126048.1 | 43124 | VLDLQKIK                             | 478.7925  | 2 | 38 | y6     | 65.2 | 103.2 |
| 2549 | IPI00126048.1 | 43124 | VNPLSLVEIILHVVR                      | 567.6857  | 3 | 24 |        | 0.0  | 24.0  |
| 2550 | IPI00137331.4 | 51875 | GAVPYVQAFDSSLANPVAEYLK               | 1183.6311 | 2 | 82 | c b9   | 5.2  | 87.2  |
| 2551 | IPI00137331.4 | 51875 | HAEMVHTGLK                           | 561.7904  | 2 | 43 | y8     | 73.4 | 116.4 |
| 2552 | IPI00137331.4 | 51875 | SSEMNVLIPTEGGDFNEFPVPEQFK            | 938.1129  | 3 | 18 |        | 0.0  | 18.0  |
| 2553 | IPI00137331.4 | 51875 | SSEMNVLIPTEGGDFNEFPVPEQFK            | 938.4444  | 3 | 24 | b8 P   | 12.2 | 36.2  |
| 2554 | IPI00379621.1 | 24004 | HTGPGILSMANAGPNTNGSQLFICTAK          | 920.7748  | 3 | 20 |        | 0.0  | 20.0  |
| 2555 | IPI00379621.1 | 24004 | HVVFGK                               | 343.7027  | 2 | 31 | y5     | 44.5 | 75.5  |
| 2556 | IPI00379621.1 | 24004 | SIYGKFEFENFILK                       | 916.9601  | 2 | 45 | y7     | 89.0 | 134.0 |
| 2557 | IPI00318970.5 | 26109 | AANGVVLATEK                          | 536.8040  | 2 | 44 | y6     | 89.0 | 133.0 |
| 2558 | IPI00318970.5 | 26109 | RYNEDLELEDIAHTAILTLK                 | 590.3148  | 4 | 22 | b5     | 15.6 | 37.6  |
| 2559 | IPI00318970.5 | 26109 | RYNEDLELEDIAHTAILTLK                 | 786.7501  | 3 | 41 | c b7   | 41.0 | 82.0  |
| 2560 | IPI00318970.5 | 26109 | RYNEDLELEDIAHTAILTLK                 | 786.7501  | 3 | 45 | y8     | 46.8 | 91.8  |
| 2561 | IPI00318970.5 | 26109 | SILYDER                              | 448.2302  | 2 | 20 | y5     | 38.2 | 58.2  |
| 2562 | IPI00314191.3 | 30907 | ALRDFLLK                             | 488.3036  | 2 | 22 | b6     | 25.4 | 47.4  |
| 2563 | IPI00314191.3 | 30907 | GVHAEEGWPNSAYGVTK                    | 601.2900  | 3 | 17 | c b8 P | 44.3 | 61.3  |
| 2564 | IPI00314191.3 | 30907 | LQAEGLSPR                            | 485.7689  | 2 | 36 | y7     | 22.4 | 58.4  |
| 2565 | IPI00314191.3 | 30907 | SPEEGAETPVYLLALLPPDAEGPHGQFVQDK      | 1064.8558 | 3 | 56 |        | 0.0  | 56.0  |
| 2566 | IPI00314191.3 | 30907 | SSSRPVALVTGANK                       | 714.8989  | 2 | 50 |        | 0.0  | 50.0  |
| 2567 | IPI00322312.1 | 23450 | AEEYEFLTPMEEAPK                      | 892.4091  | 2 | 45 | P y7   | 82.7 | 127.7 |
| 2568 | IPI00322312.1 | 23450 | VAVSADPNVNVIVTR                      | 825.9616  | 2 | 68 | P y7   | 22.4 | 90.4  |
| 2569 | IPI00117264.1 | 20236 | APLVLKD                              | 378.2371  | 2 | 27 | y4     | 32.3 | 59.3  |
| 2570 | IPI00117264.1 | 20236 | DGLILTSR                             | 437.7530  | 2 | 24 | y4     | 27.2 | 51.2  |
| 2571 | IPI00117264.1 | 20236 | GAEEMETVIPVDVMR                      | 838.4049  | 2 | 47 | P y6   | 53.0 | 100.0 |
| 2572 | IPI00117264.1 | 20236 | MMNGSHYSYSESER                       | 516.8783  | 3 | 28 | y++10  | 49.6 | 77.6  |
| 2573 | IPI00117264.1 | 20236 | RALVILAK                             | 442.3078  | 2 | 29 | c b7   | 13.7 | 42.7  |
| 2574 | IPI00117264.1 | 20236 | TQGPYDVVVLPGGNLGAQNLSESPMVK          | 924.4735  | 3 | 24 | b9     | 21.2 | 45.2  |
| 2575 | IPI00117264.1 | 20236 | TQGPYDVVVLPGGNLGAQNLSESPMVK          | 924.4776  | 3 | 42 | b9     | 32.0 | 74.0  |
| 2576 | IPI00117264.1 | 20236 | VTTHPLAK                             | 433.7586  | 2 | 37 |        | 0.0  | 37.0  |
| 2577 | IPI00331442.1 | 26200 | GVYSTQVGFAGGHTR                      | 512.9235  | 3 | 16 | y++12  | 12.2 | 28.2  |
| 2578 | IPI00331442.1 | 26200 | QGNDFGTQYR                           | 593.2682  | 2 | 45 | y5     | 29.5 | 74.5  |
| 2579 | IPI00331442.1 | 26200 | SAVYPTSAVQMEALR                      | 847.4347  | 2 | 68 | y8     | 11.6 | 79.6  |
| 2580 | IPI00331442.1 | 26200 | TGHAEVVR                             | 434.7355  | 2 | 37 | y4     | 27.2 | 64.2  |

|      |               |       |                                   |           |   |    |        |       |       |
|------|---------------|-------|-----------------------------------|-----------|---|----|--------|-------|-------|
| 2581 | IPI00395139.1 | 37539 | ENEMRENLQVFEFQLSPEDMK             | 872.0698  | 3 | 24 | P y5   | 75.6  | 99.6  |
| 2582 | IPI00395139.1 | 37539 | GIVPLAQSFK                        | 530.3141  | 2 | 21 | P y7   | 111.9 | 132.9 |
| 2583 | IPI00395139.1 | 37539 | RSPALIALR                         | 498.8194  | 2 | 43 | c b8   | 32.0  | 75.0  |
| 2584 | IPI00395139.1 | 37539 | SIGVSNFNHR                        | 565.7885  | 2 | 51 | y6     | 14.6  | 65.6  |
| 2585 | IPI00395139.1 | 37539 | TLDGLNK                           | 380.7138  | 2 | 17 | y5     | 6.6   | 23.6  |
| 2586 | IPI00320217.3 | 57783 | FWQDLMNIAGTTLSSK                  | 906.4545  | 2 | 57 | y7     | 49.6  | 106.6 |
| 2587 | IPI00320217.3 | 57783 | ILIANTGMDTDK                      | 646.3368  | 2 | 58 | y8     | 58.1  | 116.1 |
| 2588 | IPI00346501.2 | 33846 | WGEAGAEYVVESTGVFTTMEK             | 1146.0278 | 2 | 75 | y6     | 14.6  | 89.6  |
| 2589 | IPI00224784.1 | 18804 | RVAEDEDDEDDVDTKK                  | 583.9308  | 3 | 93 | c b6   | 33.8  | 126.8 |
| 2590 | IPI00129512.3 | 29211 | FQIATVTEK                         | 518.7881  | 2 | 24 | c b7   | 5.4   | 29.4  |
| 2591 | IPI00129512.3 | 29211 | QPVLSQTEAR                        | 564.8046  | 2 | 32 | y6     | 35.8  | 67.8  |
| 2592 | IPI00129512.3 | 29211 | QVLGQMVIDEELLGDGHSYSPR            | 815.4021  | 3 | 32 | y9     | 29.0  | 61.0  |
| 2593 | IPI00129512.3 | 29211 | VNDSTMLGASGDYADFQYLK              | 1098.5028 | 2 | 71 | y7     | 35.8  | 106.8 |
| 2594 | IPI00269031.1 | 55318 | IEQIEAGTPGR                       | 585.8101  | 2 | 60 | y5     | 25.4  | 85.4  |
| 2595 | IPI00269031.1 | 55318 | VLVLDVFTPTPLGTR                   | 814.4757  | 2 | 56 | P y7   | 22.4  | 78.4  |
| 2596 | IPI00345821.2 | 87426 | VKAMLWTMNNAEIAQLMSLIINTFYXNKEIFLR | 684.1871  | 6 | 20 |        | 0.0   | 20.0  |
| 2597 | IPI00345821.2 | 87426 | YIDQEELNK                         | 576.2834  | 2 | 35 | y7     | 82.7  | 117.7 |
| 2598 | IPI00270326.1 | 53289 | ESDTGLAPPALWDLAADK                | 935.4655  | 2 | 25 | c b7 P | 6.2   | 31.2  |
| 2599 | IPI00270326.1 | 53289 | ESDTGLAPPALWDLAADK                | 935.4653  | 2 | 39 | c b7 P | 46.8  | 85.8  |
| 2600 | IPI00270326.1 | 53289 | KINELTGK                          | 508.3112  | 2 | 28 | y7     | 44.3  | 72.3  |
| 2601 | IPI00270326.1 | 53289 | TMLELINQLDGFDP                    | 881.4478  | 2 | 43 | y5     | 9.6   | 52.6  |
| 2602 | IPI00270326.1 | 53289 | TMLELINQLDGFDP                    | 881.4481  | 2 | 66 | y6     | 15.6  | 81.6  |
| 2603 | IPI00127560.1 | 15880 | GSPAVDVAVK                        | 471.7668  | 2 | 26 | y5     | 69.8  | 95.8  |
| 2604 | IPI00127560.1 | 15880 | TLGISPFHEFADVFTANDSGHR            | 840.0776  | 3 | 30 | y6     | 27.2  | 57.2  |
| 2605 | IPI00127560.1 | 15880 | TLGISPFHEFADVFTANDSGHR            | 840.0775  | 3 | 34 | y8     | 20.1  | 54.1  |
| 2606 | IPI00110986.1 | 16696 | DGNGYISAAELR                      | 633.8056  | 2 | 32 | y7     | 22.4  | 54.4  |
| 2607 | IPI00110986.1 | 16696 | DGNGYISAAELR                      | 633.3101  | 2 | 66 | y6     | 15.6  | 81.6  |
| 2608 | IPI00110986.1 | 16696 | DTDSEEEIREAFR                     | 798.8593  | 2 | 31 | y++8   | 15.6  | 46.6  |
| 2609 | IPI00110986.1 | 16696 | EAFSLFDK                          | 478.7398  | 2 | 35 |        | 0.0   | 35.0  |
| 2610 | IPI00110986.1 | 16696 | MKDTDSEEEIREAFR                   | 619.2885  | 3 | 20 |        | 0.0   | 20.0  |
| 2611 | IPI00116643.2 | 42770 | EVVQGIDADR                        | 562.2975  | 2 | 35 | y4     | 29.5  | 64.5  |
| 2612 | IPI00116643.2 | 42770 | MIGLEDLIDDNYSK                    | 813.3891  | 2 | 76 | y7     | 49.6  | 125.6 |
| 2613 | IPI00323592.1 | 36030 | VAVLGASGGIGQPLSLLK                | 897.5527  | 2 | 42 | y9     | 38.5  | 80.5  |
| 2614 | IPI00323592.1 | 36030 | VAVLGASGGIGQPLSLLK                | 897.5526  | 2 | 66 | y9     | 18.3  | 84.3  |
| 2615 | IPI00110658.1 | 15307 | IGGHGAEYGAEALER                   | 765.3789  | 2 | 48 | y7     | 25.4  | 73.4  |
| 2616 | IPI00110658.1 | 15307 | IGGHGAEYGAEALER                   | 510.5832  | 3 | 49 | y4     | 41.0  | 90.0  |
| 2617 | IPI00110658.1 | 15307 | KVADALANAAGHLDDLPGALSALSDDLHAHK   | 599.3194  | 5 | 16 |        | 0.0   | 16.0  |
| 2618 | IPI00110658.1 | 15307 | LRVDPVNFK                         | 363.2133  | 3 | 33 | c b5   | 25.4  | 58.4  |
| 2619 | IPI00110658.1 | 15307 | MFASFPTTK                         | 515.2577  | 2 | 26 | y7     | 23.8  | 49.8  |
| 2620 | IPI00110658.1 | 15307 | TYFPHFDVSHGSAQVK                  | 607.6320  | 3 | 23 | y++9   | 0.9   | 23.9  |
| 2621 | IPI00110658.1 | 15307 | TYFPHFDVSHGSAQVK                  | 607.2986  | 3 | 30 | c b7   | 38.2  | 68.2  |



|      |               |       |                                         |           |   |    |         |      |       |
|------|---------------|-------|-----------------------------------------|-----------|---|----|---------|------|-------|
| 2622 | IPI00110658.1 | 15307 | VADALANAAGHLDDLPGALSALSDDLHAHK          | 573.7013  | 5 | 19 |         | 0.0  | 19.0  |
| 2623 | IPI00119004.1 | 28412 | DVEEAKPELSLLGDDY                        | 925.4376  | 2 | 49 | c b5    | 27.2 | 76.2  |
| 2624 | IPI00119004.1 | 28412 | DVEEAKPELSLLGDDY                        | 925.4414  | 2 | 60 |         | 0.0  | 60.0  |
| 2625 | IPI00118677.1 | 60867 | SLLVIPNTLAVNAAQDSTDLVAK                 | 1177.6537 | 2 | 46 | c b4    | 11.2 | 57.2  |
| 2626 | IPI00118677.1 | 60867 | SLLVIPNTLAVNAAQDSTDLVAK                 | 1177.6535 | 2 | 67 |         | 0.0  | 67.0  |
| 2627 | IPI00283862.4 | 29813 | FVFDRPLPVSR                             | 444.9188  | 3 | 18 | P y4    | 44.5 | 62.5  |
| 2628 | IPI00283862.4 | 29813 | RAQSELAHQK                              | 413.5587  | 3 | 51 | c b5    | 25.4 | 76.4  |
| 2629 | IPI00283862.4 | 29813 | RAQSELAHQKK                             | 456.2565  | 3 | 45 | c b5    | 15.6 | 60.6  |
| 2630 | IPI00283862.4 | 29813 | THAVLVALK                               | 476.3030  | 2 | 37 | y7      | 77.6 | 114.6 |
| 2631 | IPI00283862.4 | 29813 | TQIPTQR                                 | 422.2379  | 2 | 23 | P y4    | 15.6 | 38.6  |
| 2632 | IPI00314439.3 | 60775 | AIRDGVIASINHEK                          | 551.2977  | 3 | 43 | c b6    | 44.5 | 87.5  |
| 2633 | IPI00314439.3 | 60775 | LQLDSPEDAEIFIVAK                        | 837.9326  | 2 | 58 | b4      | 49.1 | 107.1 |
| 2634 | IPI00113996.4 | 26891 | DSSRLPSEGPQPAHVVGDVDR                   | 551.5377  | 4 | 16 |         | 0.0  | 16.0  |
| 2635 | IPI00113996.4 | 26891 | HDLGHFMLR                               | 375.8590  | 3 | 36 |         | 0.0  | 36.0  |
| 2636 | IPI00113996.4 | 26891 | IAIFGATGR                               | 453.2643  | 2 | 52 | y6      | 21.2 | 73.2  |
| 2637 | IPI00113996.4 | 26891 | LQDVTDDHIR                              | 606.3043  | 2 | 54 | y8      | 44.3 | 98.3  |
| 2638 | IPI00315299.3 | 20817 | NLNQALLDLHALGSAR                        | 569.3166  | 3 | 37 | b4      | 18.5 | 55.5  |
| 2639 | IPI00119239.1 | 25637 | LAAIQESGVER                             | 586.8181  | 2 | 71 | y6      | 23.8 | 94.8  |
| 2640 | IPI00119239.1 | 25637 | QVLLGDQIPK                              | 555.8297  | 2 | 42 |         | 0.0  | 42.0  |
| 2641 | IPI00119239.1 | 25637 | SGSAADTQAVADAVTYQLGFHSIELNEPPLVHTAASLFK | 1015.2668 | 4 | 15 | P y++12 | 58.1 | 73.1  |
| 2642 | IPI00331680.5 | 33842 | GNSMQEALR                               | 503.2432  | 2 | 43 | y7      | 12.9 | 55.9  |
| 2643 | IPI00331680.5 | 33842 | HLGFQSAVEALR                            | 443.2423  | 3 | 40 | y4      | 27.2 | 67.2  |
| 2644 | IPI00331680.5 | 33842 | TIILYDTNLPDVS AK                        | 831.9514  | 2 | 54 | P y6    | 82.7 | 136.7 |
| 2645 | IPI00109482.1 | 31760 | AGLGHPSAFGR                             | 556.2853  | 2 | 43 | P y6    | 14.6 | 57.6  |
| 2646 | IPI00109482.1 | 31760 | ATHAVVR                                 | 377.2222  | 2 | 20 | y4      | 15.6 | 35.6  |
| 2647 | IPI00109482.1 | 31760 | GAEILADTFK                              | 532.7858  | 2 | 54 | y6      | 38.2 | 92.2  |
| 2648 | IPI00109482.1 | 31760 | GHVLLHR                                 | 416.2514  | 2 | 43 | y4      | 27.2 | 70.2  |
| 2649 | IPI00113128.1 | 30172 | IAIDAGFR                                | 431.7427  | 2 | 43 | y5      | 57.1 | 100.1 |
| 2650 | IPI00310658.3 | 37604 | ENEMRENQVFGFQLSPEDMK                    | 848.0628  | 3 | 26 | P y5    | 41.0 | 67.0  |
| 2651 | IPI00310658.3 | 37604 | KLQLDYVDLYIMHYPVPMK                     | 789.7495  | 3 | 26 | y++11   | 42.2 | 68.2  |
| 2652 | IPI00310658.3 | 37604 | KLQLDYVDLYIMHYPVPMK                     | 789.7468  | 3 | 27 | c b8    | 21.2 | 48.2  |
| 2653 | IPI00128376.1 | 37621 | IAIDTGFR                                | 446.7480  | 2 | 30 |         | 0.0  | 30.0  |
| 2654 | IPI00128376.1 | 37621 | NAQLDYVDLYIIHFPMALQP GDK                | 888.1175  | 3 | 27 |         | 0.0  | 27.0  |
| 2655 | IPI00128376.1 | 37621 | QLETILNKPGLK                            | 451.9416  | 3 | 23 |         | 0.0  | 23.0  |
| 2656 | IPI00128376.1 | 37621 | QLETILNKPGLK                            | 677.4144  | 2 | 34 | y7      | 23.8 | 57.8  |
| 2657 | IPI00128376.1 | 37621 | SIGVSNFNFR                              | 570.7935  | 2 | 39 | y6      | 1.4  | 40.4  |
| 2658 | IPI00128376.1 | 37621 | VLDGLHR                                 | 405.2352  | 2 | 36 | y5      | 41.0 | 77.0  |
| 2659 | IPI00124225.1 | 27268 | ALVHERDEAAYGALR                         | 557.6249  | 3 | 28 | y4      | 16.9 | 44.9  |
| 2660 | IPI00124225.1 | 27268 | TKVEAFQTTISK                            | 676.8755  | 2 | 57 | y8      | 44.3 | 101.3 |
| 2661 | IPI00131845.1 | 27811 | AINQGGLT SVAVR                          | 643.3665  | 2 | 80 | y9      | 11.0 | 91.0  |
| 2662 | IPI00131845.1 | 27811 | LLDSSTVTHL FK                           | 454.2538  | 3 | 16 |         | 0.0  | 16.0  |

|      |               |       |                                 |           |   |    |         |       |       |
|------|---------------|-------|---------------------------------|-----------|---|----|---------|-------|-------|
| 2663 | IPI00131845.1 | 27811 | QTESTSFLEK                      | 585.2872  | 2 | 18 | y5      | 75.6  | 93.6  |
| 2664 | IPI00133706.1 | 22344 | EFADSLGVPFLETSK                 | 855.9340  | 2 | 53 | P y8    | 73.4  | 126.4 |
| 2665 | IPI00133706.1 | 22344 | LQIWDTAGQER                     | 658.8359  | 2 | 45 | y5      | 29.5  | 74.5  |
| 2666 | sp P15636     | 79085 | VFTSWTGGGAAASR                  | 684.3400  | 2 | 79 | y8      | 22.4  | 101.4 |
| 2667 | IPI00115866.1 | 29168 | HVEPGNAAIQEK                    | 646.8335  | 2 | 50 | P y9    | 81.7  | 131.7 |
| 2668 | IPI00115866.1 | 29168 | TVQQHAGETDPVTTMR                | 590.9531  | 3 | 35 | y4      | 29.5  | 64.5  |
| 2669 | IPI00317309.3 | 35787 | ADAEVLRK                        | 451.2593  | 2 | 38 |         | 0.0   | 38.0  |
| 2670 | IPI00317309.3 | 35787 | FITIFGTR                        | 477.7739  | 2 | 22 | y6      | 13.7  | 35.7  |
| 2671 | IPI00317309.3 | 35787 | SELTKFEK                        | 519.7780  | 2 | 15 | y7      | 46.8  | 61.8  |
| 2672 | IPI00317309.3 | 35787 | SVSHLR                          | 349.7008  | 2 | 18 | y4      | 41.0  | 59.0  |
| 2673 | IPI00317309.3 | 35787 | TPEELSAIK                       | 494.2724  | 2 | 49 | y7      | 90.2  | 139.2 |
| 2674 | IPI00317309.3 | 35787 | VLTEIIASR                       | 501.3038  | 2 | 49 | y7      | 46.8  | 95.8  |
| 2675 | IPI00317309.3 | 35787 | YMTISGFQIETIDRETSNLEQLLLAVVK    | 1133.9259 | 3 | 16 |         | 0.0   | 16.0  |
| 2676 | IPI00323911.3 | 25547 | AILSZYAAK                       | 475.2894  | 2 | 49 | y6      | 65.2  | 114.2 |
| 2677 | IPI00323911.3 | 25547 | DGHLLFGQVPLVEIDGMMLTQTR         | 857.7761  | 3 | 36 | y4      | 29.5  | 65.5  |
| 2678 | IPI00131548.1 | 30201 | LMAVPNLSMLETVDSVK               | 923.9908  | 2 | 41 |         | 0.0   | 41.0  |
| 2679 | IPI00131548.1 | 30201 | TFGENYVQELLEK                   | 785.3944  | 2 | 57 | y6      | 38.2  | 95.2  |
| 2680 | IPI00108189.2 | 13882 | AQVAQPGGDTIFGK                  | 694.8618  | 2 | 64 | P y9    | 85.6  | 149.6 |
| 2681 | IPI00108189.2 | 13882 | KHISQISVADDDDESLLGHLMIVGKK      | 570.7044  | 5 | 39 | y++9    | 15.6  | 54.6  |
| 2682 | IPI00331394.1 | 52744 | EVAGQVGVPLQDLMVR                | 855.9619  | 2 | 46 | P y8    | 90.2  | 136.2 |
| 2683 | IPI00331394.1 | 52744 | NINENFGVPNTEIHLVPILATAVQEELEK   | 1045.2132 | 3 | 34 | y7      | 22.4  | 56.4  |
| 2684 | IPI00331394.1 | 52744 | NINENFGVPNTEIHLVPILATAVQEELEK   | 1045.2136 | 3 | 42 | P y++13 | 48.5  | 90.5  |
| 2685 | IPI00136483.1 | 30214 | DGIVLGADTR                      | 508.7721  | 2 | 50 | y7      | 12.9  | 62.9  |
| 2686 | IPI00136483.1 | 30214 | FRPDMEEEEAK                     | 690.8133  | 2 | 40 | c b4    | 7.1   | 47.1  |
| 2687 | IPI00136483.1 | 30214 | GTTAVLTEK                       | 460.2587  | 2 | 47 | c b6    | 15.6  | 62.6  |
| 2688 | IPI00154045.1 | 55905 | ALELEQELR                       | 550.8013  | 2 | 37 | y7      | 49.6  | 86.6  |
| 2689 | IPI00154045.1 | 55905 | ANIGDAQAMGQRPITFFR              | 665.0128  | 3 | 51 |         | 0.0   | 51.0  |
| 2690 | IPI00154045.1 | 55905 | LLVAGEGR                        | 407.7428  | 2 | 35 | y6      | 35.8  | 70.8  |
| 2691 | IPI00154045.1 | 55905 | LRHFHAK                         | 303.5120  | 3 | 16 |         | 0.0   | 16.0  |
| 2692 | IPI00352095.3 | 50174 | IGYNPDTVAFVPIGWNGDNMLKPSANMPWFK | 1190.2358 | 3 | 35 | b8      | 5.6   | 40.6  |
| 2693 | IPI00352095.3 | 50174 | IGYNPDTVAFVPIGWNGDNMLKPSANMPWFK | 1190.2362 | 3 | 39 |         | 0.0   | 39.0  |
| 2694 | IPI00131407.1 | 26565 | LNATNIELATVQPQGNFHMFTK          | 825.7548  | 3 | 51 | y++13   | 27.7  | 78.7  |
| 2695 | IPI00131407.1 | 26565 | SSLILK                          | 387.2603  | 2 | 45 | y4      | 57.1  | 102.1 |
| 2696 | IPI00123750.1 | 41260 | GNFGDNSGLAEYVAQAIDPSLSWDDITWLRR | 1156.5624 | 3 | 73 | y++14   | 15.5  | 88.5  |
| 2697 | IPI00230042.3 | 21649 | IMQEFESDTFFPEIDLK               | 1074.0075 | 2 | 37 | P y7    | 102.5 | 139.5 |
| 2698 | IPI00230042.3 | 21649 | LLPEYPGVLSEVQEEK                | 915.4801  | 2 | 59 | c b5 P  | 53.0  | 112.0 |
| 2699 | IPI00124692.1 | 37534 | IHLDEK                          | 377.7084  | 2 | 23 | y4      | 41.0  | 64.0  |
| 2700 | IPI00124692.1 | 37534 | LIELYK                          | 389.7392  | 2 | 26 | y5      | 57.1  | 83.1  |
| 2701 | IPI00124692.1 | 37534 | LLGELLK                         | 393.2603  | 2 | 28 | y6      | 53.0  | 81.0  |
| 2702 | IPI00124692.1 | 37534 | LSDGIRK                         | 394.7350  | 2 | 29 | y4      | 15.6  | 44.6  |
| 2703 | IPI00124692.1 | 37534 | MESALDQLK                       | 517.7632  | 2 | 43 | y5      | 38.2  | 81.2  |

|      |               |       |                               |           |   |    |        |       |       |
|------|---------------|-------|-------------------------------|-----------|---|----|--------|-------|-------|
| 2704 | IPI00124692.1 | 37534 | SYEPQEDPGVK                   | 624.7907  | 2 | 39 | P y8   | 90.2  | 129.2 |
| 2705 | IPI00124692.1 | 37534 | VSTEVDAR                      | 438.7245  | 2 | 40 |        | 0.0   | 40.0  |
| 2706 | IPI00124692.1 | 37534 | WLHNEDQMAVEK                  | 500.5698  | 3 | 32 | y5     | 62.3  | 94.3  |
| 2707 | IPI00337957.3 | 99448 | ALLELQLEPEELYQTFQR            | 1111.0814 | 2 | 46 | b7     | 13.7  | 59.7  |
| 2708 | IPI00337957.3 | 99448 | GEGQLSAAER                    | 509.2520  | 2 | 58 | y5     | 14.6  | 72.6  |
| 2709 | IPI00337957.3 | 99448 | WLPAGDALLQMITIHLPSVTAQK       | 867.8147  | 3 | 18 | P y8   | 22.4  | 40.4  |
| 2710 | IPI00120914.1 | 38090 | IQDALSTVLQYAEDVLSGK           | 1026.0443 | 2 | 71 | y8     | 77.6  | 148.6 |
| 2711 | IPI00119945.1 | 30825 | ESSIYLIGGSIPPEEDAGK           | 932.9637  | 2 | 70 | P y7   | 102.5 | 172.5 |
| 2712 | IPI00119945.1 | 30825 | RADLYTVESK                    | 591.3126  | 2 | 29 | b7     | 35.8  | 64.8  |
| 2713 | IPI00312058.3 | 60083 | ASQRPDVLTGGGNPIGDK            | 628.3289  | 3 | 25 | y9     | 33.8  | 58.8  |
| 2714 | IPI00312058.3 | 60083 | EAETFPNPFDLTK                 | 828.9023  | 2 | 18 | c b5 P | 69.8  | 87.8  |
| 2715 | IPI00312058.3 | 60083 | NAIHTYTQAGSHMAAK              | 567.9453  | 3 | 37 | y++12  | 27.7  | 64.7  |
| 2716 | IPI00312058.3 | 60083 | NAIHTYTQAGSHMAAK              | 567.6113  | 3 | 44 |        | 0.0   | 44.0  |
| 2717 | IPI00312058.3 | 60083 | NPVNYFAEVEQMAFDPSNMPPGIEPSPDK | 1074.8268 | 3 | 30 | y6     | 49.1  | 79.1  |
| 2718 | IPI00312058.3 | 60083 | RTPIAVR                       | 406.7590  | 2 | 19 | c b5   | 7.1   | 26.1  |
| 2719 | IPI00312058.3 | 60083 | VLNEEERK                      | 508.7731  | 2 | 26 |        | 0.0   | 26.0  |
| 2720 | IPI00121348.1 | 34970 | ALGVNTVGAQTLK                 | 636.3695  | 2 | 55 | y6     | 25.4  | 80.4  |
| 2721 | IPI00121348.1 | 34970 | LFYEHPIFSEVISDQEAVSALEK       | 884.7835  | 3 | 23 | y5     | 29.5  | 52.5  |
| 2722 | IPI00121348.1 | 34970 | LFYEHPIFSEVISDQEAVSALEK       | 884.7803  | 3 | 28 | y5     | 41.0  | 69.0  |
| 2723 | IPI00121348.1 | 34970 | LGIPATIVVPNTTPALTIER          | 1039.1070 | 2 | 33 | y8     | 22.4  | 55.4  |
| 2724 | IPI00121348.1 | 34970 | NNPGWVYISPFDDPLIWEGHTSLVK     | 962.4828  | 3 | 18 |        | 0.0   | 18.0  |
| 2725 | IPI00121348.1 | 34970 | NNPGWVYISPFDDPLIWEGHTSLVK     | 962.4830  | 3 | 19 | b6     | 1.6   | 20.6  |
| 2726 | IPI00230427.3 | 12667 | ASVPEGFLSELTQQLAQATGK         | 1088.5703 | 2 | 49 | c b7   | 1.6   | 50.6  |
| 2727 | IPI00230427.3 | 12667 | ASVPEGFLSELTQQLAQATGK         | 1088.5702 | 2 | 51 | y6     | 46.8  | 97.8  |
| 2728 | IPI00230427.3 | 12667 | LHISPDR                       | 419.2329  | 2 | 23 |        | 0.0   | 23.0  |
| 2729 | IPI00133551.2 | 16311 | FHVPLLLSPWSYTTYR              | 660.6846  | 3 | 48 | c b8 P | 13.7  | 61.7  |
| 2730 | IPI00133551.2 | 16311 | TSYTNLDGR                     | 513.7459  | 2 | 48 | y7     | 33.8  | 81.8  |
| 2731 | IPI00132194.1 | 34318 | GAEADQIIEYLK                  | 675.3522  | 2 | 67 | c b8   | 12.9  | 79.9  |
| 2732 | IPI00123449.1 | 17253 | DVQLSGPGGSVQDQAPDLYTYFTMLK    | 920.7804  | 3 | 41 | y4     | 32.3  | 73.3  |
| 2733 | IPI00123449.1 | 17253 | DVQLSGPGGSVQDQAPDLYTYFTMLK    | 920.7801  | 3 | 45 | y5     | 20.6  | 65.6  |
| 2734 | IPI00117914.1 | 34957 | GPAALRK                       | 356.7270  | 2 | 30 | y4     | 7.1   | 37.1  |
| 2735 | IPI00117914.1 | 34957 | TGLLSGLDIMEVNPTLGK            | 929.5026  | 2 | 29 | y6     | 35.8  | 64.8  |
| 2736 | IPI00117914.1 | 34957 | TGLLSGLDIMEVNPTLGK            | 930.0085  | 2 | 54 | y9     | 52.8  | 106.8 |
| 2737 | IPI00117910.1 | 21936 | EGGLGPLNIPLLDVTK              | 853.9867  | 2 | 39 |        | 0.0   | 39.0  |
| 2738 | IPI00117910.1 | 21936 | QITVNDLPVGR                   | 606.3402  | 2 | 41 |        | 0.0   | 41.0  |
| 2739 | IPI00117910.1 | 21936 | SLSQNYGVLK                    | 554.8039  | 2 | 35 | y8     | 44.3  | 79.3  |
| 2740 | IPI00380214.1 | 34151 | VEIVAINDPFIDLNYMVXMFQYDSTHGK  | 1108.5299 | 3 | 26 |        | 0.0   | 26.0  |
| 2741 | IPI00230139.3 | 51939 | RGEAHLAVNDFDLAR               | 561.9584  | 3 | 40 |        | 0.0   | 40.0  |
| 2742 | IPI00230139.3 | 51939 | VLQLYPSNK                     | 531.3029  | 2 | 47 | P y4   | 57.1  | 104.1 |
| 2743 | IPI00228491.1 | 58799 | FLGPDGSLLLDLLQLAEPPPK         | 788.4340  | 3 | 36 | P y4   | 27.2  | 63.2  |
| 2744 | IPI00228491.1 | 58799 | TAGAQQMPWLESVPIAVSNNIDESELMR  | 1078.8590 | 3 | 52 | y7     | 33.8  | 85.8  |

|      |               |        |                               |           |   |    |        |      |       |
|------|---------------|--------|-------------------------------|-----------|---|----|--------|------|-------|
| 2745 | IPI00130353.1 | 141439 | SILYVSPHPDAFPSLR              | 920.9817  | 2 | 63 | y6     | 14.6 | 77.6  |
| 2746 | IPI00330302.2 | 80167  | ASLQVLGTVGEPINPEAWLWYHR       | 879.7945  | 3 | 37 | b10    | 5.0  | 42.0  |
| 2747 | IPI00330302.2 | 80167  | ASLQVLGTVGEPINPEAWLWYHR       | 879.7945  | 3 | 37 | b6     | 0.9  | 37.9  |
| 2748 | IPI00330302.2 | 80167  | IGPIATPDYIQNAPGLPK            | 933.5133  | 2 | 34 | P y5   | 57.1 | 91.1  |
| 2749 | IPI00226835.1 | 47951  | SSMPDLPGAMDEPYDTR             | 941.4037  | 2 | 63 | y6     | 38.2 | 101.2 |
| 2750 | IPI00230044.1 | 29231  | IQVLQQQADDAEERAER             | 667.0010  | 3 | 45 |        | 0.0  | 45.0  |
| 2751 | IPI00230044.1 | 29231  | LATALQK                       | 372.7348  | 2 | 24 | y5     | 44.5 | 68.5  |
| 2752 | IPI00230044.1 | 29231  | MLDQTLDDLNEM                  | 718.3487  | 2 | 40 | y5     | 25.4 | 65.4  |
| 2753 | IPI00378963.1 | 29989  | SVEAAAELSAK                   | 538.2853  | 2 | 62 | y9     | 66.6 | 128.6 |
| 2754 | IPI00407451.1 | 63297  | GVLLGIDDLQTNQFK               | 830.9474  | 2 | 61 | y6     | 6.2  | 67.2  |
| 2755 | IPI00266614.1 | 26328  | GFAFDIPGFYDSGFLK              | 890.9346  | 2 | 33 | c b6 P | 6.6  | 39.6  |
| 2756 | IPI00225670.1 | 83971  | DLVQDPSLLGGTISAYK             | 888.9726  | 2 | 58 | y8     | 21.2 | 79.2  |
| 2757 | IPI00127691.1 | 52442  | EGGGNNLYGEEMVQALEQLK          | 1090.5259 | 2 | 57 | y7     | 25.4 | 82.4  |
| 2758 | IPI00266909.4 | 103951 | KPEAQLPAVYPFAAVMYQNELFNLQK    | 1004.1917 | 3 | 39 | y6     | 75.6 | 114.6 |
| 2759 | IPI00266909.4 | 103951 | KPEAQLPAVYPFAAVMYQNELFNLQK    | 1004.1919 | 3 | 41 | y4     | 16.9 | 57.9  |
| 2760 | IPI00124181.1 | 48212  | NEVSFVIHNLPIIAK               | 847.4870  | 2 | 57 | P y5   | 89.0 | 146.0 |
| 2761 | IPI00133428.1 | 49325  | AVANQTSATFLR                  | 639.8451  | 2 | 54 |        | 0.0  | 54.0  |
| 2762 | IPI00133428.1 | 49325  | KYEPPVPTR                     | 543.8007  | 2 | 27 | P y6   | 49.6 | 76.6  |
| 2763 | IPI00121962.1 | 81575  | TNNFNVELTK                    | 590.3042  | 2 | 38 | y8     | 32.0 | 70.0  |
| 2764 | IPI00121962.1 | 81575  | TTADEWGENYFLIGPYFEHNMK        | 888.4034  | 3 | 25 |        | 0.0  | 25.0  |
| 2765 | IPI00121962.1 | 81575  | TTADEWGENYFLIGPYFEHNMK        | 888.4030  | 3 | 32 | b6     | 6.6  | 38.6  |
| 2766 | IPI00121962.1 | 81575  | YYQHAR                        | 419.2040  | 2 | 27 | y4     | 27.2 | 54.2  |
| 2767 | IPI00121517.1 | 39535  | ILQEAGADISK                   | 572.8140  | 2 | 48 | y6     | 69.8 | 117.8 |
| 2768 | IPI00121517.1 | 39535  | TVMSHLDR                      | 479.7427  | 2 | 20 | y5     | 62.3 | 82.3  |
| 2769 | IPI00112555.3 | 82624  | KSEMESVLAQLDNYGQQELADLFVNYNVK | 1116.5525 | 3 | 56 | y7     | 49.6 | 105.6 |
| 2770 | IPI00318841.1 | 50371  | RILGLLDTHLK                   | 426.9350  | 3 | 46 | c b5   | 29.5 | 75.5  |
| 2771 | IPI00318841.1 | 50371  | YSNEDTLSVALPYFWEHFDK          | 821.3830  | 3 | 30 |        | 0.0  | 30.0  |
| 2772 | IPI00133605.1 | 62612  | TGVLQGGPESEVEIVK              | 821.4394  | 2 | 55 | y7     | 25.4 | 80.4  |
| 2773 | IPI00130950.1 | 45448  | QGFIDLPEFPFGLEPR              | 931.4790  | 2 | 55 | P y7   | 61.4 | 116.4 |
| 2774 | IPI00277001.3 | 30141  | VEIATLTR                      | 451.7696  | 2 | 53 | y6     | 25.4 | 78.4  |
| 2775 | IPI00118324.2 | 9544   | ESTLHLVLR                     | 534.3142  | 2 | 25 |        | 0.0  | 25.0  |
| 2776 | IPI00118324.2 | 9544   | LIFAGK                        | 324.7079  | 2 | 22 | y5     | 53.0 | 75.0  |
| 2777 | IPI00118324.2 | 9544   | LIFAGK                        | 648.4086  | 1 | 25 |        | 0.0  | 25.0  |
| 2778 | IPI00118324.2 | 9544   | MQIFVK                        | 383.2198  | 2 | 33 | y5     | 38.2 | 71.2  |
| 2779 | IPI00118324.2 | 9544   | MQIFVK                        | 765.4387  | 1 | 34 | y4     | 32.3 | 66.3  |
| 2780 | IPI00118324.2 | 9544   | TLSDYNIQK                     | 541.2805  | 2 | 27 | y7     | 77.6 | 104.6 |
| 2781 | IPI00109823.2 | 81850  | ENNNVNYDWIHWAPEDPYK           | 802.3608  | 3 | 19 | P y6   | 53.0 | 72.0  |
| 2782 | IPI00109823.2 | 81850  | EWAPGAEGVFLTGFEFGWNPFSHPYK    | 971.1239  | 3 | 19 |        | 0.0  | 19.0  |
| 2783 | IPI00109823.2 | 81850  | EWAPGAEGVFLTGFEFGWNPFSHPYK    | 971.1239  | 3 | 20 |        | 0.0  | 20.0  |
| 2784 | IPI00109823.2 | 81850  | GIQLHK                        | 348.2135  | 2 | 25 | y4     | 36.1 | 61.1  |
| 2785 | IPI00109823.2 | 81850  | GYESFGIHR                     | 533.2593  | 2 | 35 | y6     | 14.6 | 49.6  |

|      |               |        |                                   |           |   |    |         |      |       |
|------|---------------|--------|-----------------------------------|-----------|---|----|---------|------|-------|
| 2786 | IPI00109823.2 | 81850  | HFTSNVLPR                         | 535.7916  | 2 | 32 | y7      | 61.4 | 93.4  |
| 2787 | IPI00109823.2 | 81850  | IVLDSDAAEYGGHQR                   | 544.2651  | 3 | 21 | y++14   | 34.1 | 55.1  |
| 2788 | IPI00128564.1 | 40906  | SVMGALASQATK                      | 582.3091  | 2 | 52 | y5      | 53.0 | 105.0 |
| 2789 | IPI00132951.2 | 84215  | ETLLEMFK                          | 505.7648  | 2 | 45 |         | 0.0  | 45.0  |
| 2790 | IPI00132951.2 | 84215  | KRPVIVHR                          | 335.5542  | 3 | 19 |         | 0.0  | 19.0  |
| 2791 | IPI00132951.2 | 84215  | MDGEKPVDASEEK                     | 478.8856  | 3 | 22 |         | 0.0  | 22.0  |
| 2792 | IPI00132951.2 | 84215  | QLENSLNEFGEKWELNPGDGAFYGP         | 980.8005  | 3 | 19 | y9      | 22.4 | 41.4  |
| 2793 | IPI00132951.2 | 84215  | QLENSLNEFGEKWELNPGDGAFYGP         | 980.8013  | 3 | 31 | y7      | 35.8 | 66.8  |
| 2794 | IPI00226805.1 | 107713 | IVAVTGAEAQK                       | 543.8114  | 2 | 48 | y7      | 77.6 | 125.6 |
| 2795 | IPI00226805.1 | 107713 | LVSVLQNK                          | 450.7800  | 2 | 28 | y6      | 25.4 | 53.4  |
| 2796 | IPI00226805.1 | 107713 | MALELLTQEFGIPVER                  | 923.9925  | 2 | 20 | P y4    | 41.0 | 61.0  |
| 2797 | IPI00226805.1 | 107713 | MALELLTQEFGIPVER                  | 923.9928  | 2 | 33 | P y4    | 41.0 | 74.0  |
| 2798 | IPI00135640.1 | 45768  | TMLELLNQLDGFATK                   | 912.4684  | 2 | 51 | y7      | 95.7 | 146.7 |
| 2799 | IPI00110528.1 | 32191  | ARREEDGIVLDFPVYPTFPQDFHEVEDLIK    | 894.7029  | 4 | 20 | b6      | 16.9 | 36.9  |
| 2800 | IPI00110528.1 | 32191  | ARREEDGIVLDFPVYPTFPQDFHEVEDLIK    | 894.7024  | 4 | 37 | b6      | 1.3  | 38.3  |
| 2801 | IPI00110528.1 | 32191  | VNTEPLPAIEK                       | 605.8371  | 2 | 20 | P y7    | 49.6 | 69.6  |
| 2802 | IPI00115871.1 | 46335  | LAHAVHER                          | 311.5071  | 3 | 24 |         | 0.0  | 24.0  |
| 2803 | IPI00115871.1 | 46335  | LAHAVHER                          | 466.7573  | 2 | 49 | y5      | 41.0 | 90.0  |
| 2804 | IPI00308885.2 | 61201  | TLNDELEIIEGMK                     | 752.8814  | 2 | 49 | y5      | 44.5 | 93.5  |
| 2805 | IPI00129928.2 | 54564  | MPIPVIQAFGILK                     | 713.9282  | 2 | 49 | y7      | 15.6 | 64.6  |
| 2806 | IPI00129928.2 | 54564  | NVLHSAR                           | 398.7248  | 2 | 21 | y5      | 53.0 | 74.0  |
| 2807 | IPI00277670.1 | 58144  | VTQDATPGSALDK                     | 651.8300  | 2 | 49 | P y7    | 33.8 | 82.8  |
| 2808 | IPI00116134.1 | 83258  | LASVLNTDPALDSELTSK                | 937.4902  | 2 | 48 | c b8 P  | 5.4  | 53.4  |
| 2809 | IPI00116134.1 | 83258  | VILGSKAAQQR                       | 585.8473  | 2 | 19 | y9      | 11.0 | 30.0  |
| 2810 | IPI00339916.1 | 171739 | AIQGATSHHLGQNF                    | 565.9572  | 3 | 21 | y++11   | 12.9 | 33.9  |
| 2811 | IPI00339916.1 | 171739 | EVVPVNLDAQEEMK                    | 850.4311  | 2 | 48 | y8      | 35.8 | 83.8  |
| 2812 | IPI00137930.1 | 12853  | SAIQNLHSFDPFADASKGDDLLPAGTEDYIHIR | 914.9471  | 4 | 30 |         | 0.0  | 30.0  |
| 2813 | IPI00137930.1 | 12853  | SAIQNLHSFDPFADASKGDDLLPAGTEDYIHIR | 914.9470  | 4 | 38 | y6      | 16.9 | 54.9  |
| 2814 | IPI00331528.4 | 12017  | QGLLEFVDITATNNTSAIQDYQLQLTGAR     | 1061.2129 | 3 | 47 | y4      | 18.5 | 65.5  |
| 2815 | IPI00346002.2 | 26821  | ATISNDGATILK                      | 602.3329  | 2 | 46 | y9      | 11.0 | 57.0  |
| 2816 | IPI00330303.4 | 68172  | DVSELTFPEMLGGR                    | 804.3901  | 2 | 46 | P y7    | 65.2 | 111.2 |
| 2817 | IPI00315879.1 | 53190  | TGQEIPVNL                         | 563.8150  | 2 | 46 | P y5    | 57.1 | 103.1 |
| 2818 | IPI00128945.1 | 23063  | MRNGYELSPATAANFTR                 | 633.6454  | 3 | 38 | c b8 P  | 12.2 | 50.2  |
| 2819 | IPI00128945.1 | 23063  | RFILNLPTFSVR                      | 488.2893  | 3 | 31 | b5      | 29.5 | 60.5  |
| 2820 | IPI00128945.1 | 23063  | VAASNIVQMKDDHDK                   | 557.6100  | 3 | 17 | y++12   | 29.0 | 46.0  |
| 2821 | IPI00113845.1 | 26583  | AGGSASAMLQPLLDNQVGF               | 1002.5148 | 2 | 45 | c b10 P | 19.2 | 64.2  |
| 2822 | IPI00357831.3 | 18158  | TITLQVEPSDTIENVK                  | 894.9693  | 2 | 18 |         | 0.0  | 18.0  |
| 2823 | IPI00357831.3 | 18158  | TITLQVEPSDTIENVK                  | 894.4690  | 2 | 45 |         | 0.0  | 45.0  |
| 2824 | IPI00320400.5 | 53595  | DAFERNPELQNLDDFFK                 | 775.7244  | 3 | 25 | y7      | 46.8 | 71.8  |
| 2825 | IPI00320400.5 | 53595  | VVQLEGSKK                         | 494.2960  | 2 | 31 | y7      | 49.6 | 80.6  |
| 2826 | IPI00128491.1 | 19895  | LGPIPFSSLLQYD                     | 755.9052  | 2 | 44 | y6      | 53.0 | 97.0  |

|      |               |        |                                   |           |   |    |        |       |       |
|------|---------------|--------|-----------------------------------|-----------|---|----|--------|-------|-------|
| 2827 | IPI00119755.1 | 29692  | EVFFVPLDYFLHPQVYYQK               | 811.7491  | 3 | 15 |        | 0.0   | 15.0  |
| 2828 | IPI00119755.1 | 29692  | EVFFVPLDYFLHPQVYYQK               | 811.7491  | 3 | 18 |        | 0.0   | 18.0  |
| 2829 | IPI00119755.1 | 29692  | FSVLVPLLAR                        | 557.8528  | 2 | 44 | P y5   | 65.2  | 109.2 |
| 2830 | IPI00121736.1 | 21911  | DRSGVISDNELQQALSNGTWPFPNPVTVR     | 1068.2092 | 3 | 44 | P y5   | 49.6  | 93.6  |
| 2831 | IPI00131478.1 | 34180  | LHPDPGTWESFLENFMDGK               | 741.0100  | 3 | 26 |        | 0.0   | 26.0  |
| 2832 | IPI00131478.1 | 34180  | LHPDPGTWESFLENFMDGK               | 741.0101  | 3 | 27 | y7     | 23.8  | 50.8  |
| 2833 | IPI00131478.1 | 34180  | YFAETMEQLQNFTAWPDDVLISTYPK        | 1036.8282 | 3 | 17 | y5     | 18.5  | 35.5  |
| 2834 | IPI00113262.1 | 34726  | AVAVVVDPIQSVK                     | 662.9028  | 2 | 36 | y7     | 49.6  | 85.6  |
| 2835 | IPI00113262.1 | 34726  | HNESVVK                           | 406.7170  | 2 | 31 | y6     | 69.8  | 100.8 |
| 2836 | IPI00113262.1 | 34726  | LGGGMPGLGQGPPDAPAVDTAEQVYISSLALLK | 1109.2447 | 3 | 18 |        | 0.0   | 18.0  |
| 2837 | IPI00153294.2 | 60304  | ILATGGASHNK                       | 534.7936  | 2 | 43 | y9     | 52.8  | 95.8  |
| 2838 | IPI00222323.1 | 47746  | AAFIDNMNQYTR                      | 722.3448  | 2 | 25 | y5     | 15.6  | 40.6  |
| 2839 | IPI00222323.1 | 47746  | WTSSDWTFDPR                       | 699.3100  | 2 | 36 | y6     | 12.9  | 48.9  |
| 2840 | IPI00340120.2 | 40302  | AIDLFTDAIK                        | 553.8082  | 2 | 42 | y8     | 90.2  | 132.2 |
| 2841 | Trypsin       | 25078  | VATVSLPR                          | 421.7588  | 2 | 31 | y4     | 16.9  | 47.9  |
| 2842 | Trypsin       | 25078  | VATVSLPR                          | 421.7587  | 2 | 32 | y6     | 38.2  | 70.2  |
| 2843 | IPI00120095.2 | 73517  | LTDNIFLEVHSTDPQLSEAQSILR          | 947.5038  | 3 | 41 | y6     | 6.2   | 47.2  |
| 2844 | IPI00120165.1 | 71131  | EEGLPVPELFEDPLFSR                 | 987.4962  | 2 | 41 | P y5   | 65.2  | 106.2 |
| 2845 | IPI00119622.1 | 55737  | HLLDGIQR                          | 476.2725  | 2 | 22 | y6     | 35.8  | 57.8  |
| 2846 | IPI00119622.1 | 55737  | RIDQAFALTR                        | 595.8359  | 2 | 40 | y7     | 22.4  | 62.4  |
| 2847 | IPI00127596.1 | 43246  | DLFDPIIQR                         | 616.3197  | 2 | 39 | P y6   | 14.6  | 53.6  |
| 2848 | IPI00127596.1 | 43246  | SMTEQEQQQLIDDHFLFDKPVSPLLLASGMAR  | 912.4586  | 4 | 24 | y5     | 16.9  | 40.9  |
| 2849 | IPI00121788.1 | 22390  | LVQAFQFTDK                        | 598.8193  | 2 | 40 | y8     | 23.8  | 63.8  |
| 2850 | IPI00377386.1 | 41482  | DLAEELGLVNVMEDK                   | 559.2745  | 3 | 36 |        | 0.0   | 36.0  |
| 2851 | IPI00377386.1 | 41482  | ISGFPK                            | 648.3727  | 1 | 31 | y4     | 32.3  | 63.3  |
| 2852 | IPI00352984.2 | 148534 | KLHPVQER                          | 336.1980  | 3 | 19 |        | 0.0   | 19.0  |
| 2853 | IPI00134334.2 | 38486  | VDPQLVDGHLSYFLGAIGMPGLTSLIGVQEK   | 1085.9133 | 3 | 20 | y5     | 16.9  | 36.9  |
| 2854 | IPI00134334.2 | 38486  | VDPQLVDGHLSYFLGAIGMPGLTSLIGVQEK   | 1085.9128 | 3 | 39 |        | 0.0   | 39.0  |
| 2855 | IPI00131228.1 | 27981  | YDYVFPENGLVAYK                    | 839.4112  | 2 | 39 | P y9   | 78.1  | 117.1 |
| 2856 | IPI00228757.1 | 5050   | SDKPDMAEIEK                       | 652.8046  | 2 | 38 | P y8   | 102.9 | 140.9 |
| 2857 | IPI00346617.2 | 31327  | LQQLNAQYR                         | 567.3072  | 2 | 37 | y5     | 16.9  | 53.9  |
| 2858 | IPI00125971.1 | 44430  | ALQSVGQIVGEVLK                    | 720.9251  | 2 | 24 | y9     | 81.7  | 105.7 |
| 2859 | IPI00125971.1 | 44430  | ELREVIELPLTNPELFR                 | 733.0728  | 3 | 18 | c b8 P | 33.8  | 51.8  |
| 2860 | IPI00125971.1 | 44430  | TLMELLNQMDGFDTLHR                 | 678.9979  | 3 | 37 | b5     | 8.5   | 45.5  |
| 2861 | IPI00116281.1 | 58424  | GIDPFSLDALAK                      | 623.8385  | 2 | 37 | P y9   | 66.6  | 103.6 |
| 2862 | IPI00116308.1 | 41801  | LAILYAK                           | 396.2550  | 2 | 22 | y4     | 44.5  | 66.5  |
| 2863 | IPI00314948.3 | 70873  | RGQVVGTR                          | 436.7567  | 2 | 28 | c b5   | 11.2  | 39.2  |
| 2864 | IPI00314948.3 | 70873  | VLSMAPGLTSVEIIPFR                 | 915.5145  | 2 | 36 | y4     | 16.9  | 52.9  |
| 2865 | IPI00121271.1 | 23015  | AAGHLLK                           | 355.2215  | 2 | 22 | c b6   | 27.2  | 49.2  |
| 2866 | IPI00121271.1 | 23015  | MVDMPANNK                         | 510.2361  | 2 | 33 | y7     | 77.6  | 110.6 |
| 2867 | IPI00121271.1 | 23015  | VLEVASGSGQHAHFAQAFPNAEWQPSVDVQR   | 863.4119  | 4 | 25 |        | 0.0   | 25.0  |

|      |               |        |                                  |           |   |    |        |       |       |
|------|---------------|--------|----------------------------------|-----------|---|----|--------|-------|-------|
| 2868 | IPI00121271.1 | 23015  | VLEVASGSGQHAAHFAQAFPNAEWQPSDQDQR | 863.4116  | 4 | 30 | P y7   | 35.8  | 65.8  |
| 2869 | IPI00355295.2 | -1     | ISQLIR                           | 365.7265  | 2 | 36 |        | 0.0   | 36.0  |
| 2870 | IPI00331262.1 | 80174  | ENISQDIDHILETLSALAVDLGGTNLR      | 969.8444  | 3 | 17 |        | 0.0   | 17.0  |
| 2871 | IPI00331262.1 | 80174  | ENISQDIDHILETLSALAVDLGGTNLR      | 970.1760  | 3 | 36 | y5     | 16.9  | 52.9  |
| 2872 | IPI00126317.1 | 72134  | KEQEAKEK                         | 495.7645  | 2 | 35 |        | 0.0   | 35.0  |
| 2873 | IPI00346834.1 | 63319  | AQYEDIAQK                        | 533.2645  | 2 | 35 | y7     | 102.9 | 137.9 |
| 2874 | IPI00274136.2 | 33525  | MRKPDGSTVTQR                     | 459.2422  | 3 | 34 | y4     | 15.6  | 49.6  |
| 2875 | IPI00228328.3 | 15117  | AFDGTWK                          | 866.4030  | 1 | 34 |        | 0.0   | 34.0  |
| 2876 | IPI00228328.3 | 15117  | ELIAVR                           | 350.7215  | 2 | 18 |        | 0.0   | 18.0  |
| 2877 | IPI00330246.1 | 152848 | RTTESPR                          | 423.7251  | 2 | 34 | y4     | 1.3   | 35.3  |
| 2878 | IPI00127989.1 | 18995  | LNWLSVDFFNNWK                    | 768.3862  | 2 | 34 | y6     | 53.0  | 87.0  |
| 2879 | IPI00318976.3 | 25958  | FAEVENVVDITLFLSNR                | 693.7104  | 3 | 34 | y4     | 15.6  | 49.6  |
| 2880 | IPI00135730.1 | 20790  | LGLHSLR                          | 398.2455  | 2 | 34 | y4     | 41.0  | 75.0  |
| 2881 | IPI00122670.2 | 85543  | ALWLPMGD                         | 902.4420  | 1 | 34 | P y4   | 69.9  | 103.9 |
| 2882 | IPI00124793.1 | 34773  | LQEAYYIFQELADK                   | 866.4345  | 2 | 33 | y7     | 35.8  | 68.8  |
| 2883 | IPI00318182.1 | 154565 | PLNVFIK                          | 415.7587  | 2 | 33 | c b6   | 7.1   | 40.1  |
| 2884 | IPI00108762.1 | 10794  | VAGQDGSVVQFK                     | 617.8259  | 2 | 33 | y7     | 33.8  | 66.8  |
| 2885 | IPI00229834.2 | 140031 | HVLEGHDR                         | 321.4983  | 3 | 33 | c b4   | 32.3  | 65.3  |
| 2886 | IPI00380506.1 | 72843  | QISAVHK                          | 782.4532  | 1 | 33 |        | 0.0   | 33.0  |
| 2887 | IPI00126730.2 | 97351  | ESILRK                           | 373.2321  | 2 | 33 |        | 0.0   | 33.0  |
| 2888 | IPI00310091.1 | 66077  | IGPILDNSTLQSEVKPILEK             | 732.4160  | 3 | 32 | y++14  | 9.3   | 41.3  |
| 2889 | IPI00127109.2 | 25515  | LVLVGDGGTGK                      | 508.2927  | 2 | 18 | y7     | 21.2  | 39.2  |
| 2890 | IPI00127109.2 | 25515  | RHLTGEFEK                        | 372.8646  | 3 | 31 | y5     | 29.5  | 60.5  |
| 2891 | IPI00113257.3 | 16458  | LLEELEEGQK                       | 594.3108  | 2 | 31 | y8     | 129.6 | 160.6 |
| 2892 | IPI00132957.1 | -1     | DLQLLR                           | 379.2321  | 2 | 31 | y4     | 41.0  | 72.0  |
| 2893 | IPI00124639.1 | 23290  | VASVYESPGFFLNLEPIPGALDALREMNDMK  | 1142.5745 | 3 | 31 | y++17  | 5.4   | 36.4  |
| 2894 | IPI00311229.1 | 72908  | EVERALQLPK                       | 592.3380  | 2 | 31 |        | 0.0   | 31.0  |
| 2895 | IPI00114285.1 | 27708  | LWMAAMQQDPVASSHK                 | 600.6251  | 3 | 19 | b4     | 7.7   | 26.7  |
| 2896 | IPI00115580.1 | 42946  | QQWQQLYDTLNAWK                   | 911.9530  | 2 | 21 | y++13  | 36.9  | 57.9  |
| 2897 | IPI00115580.1 | 42946  | VVVSHSTHR                        | 341.1897  | 3 | 31 |        | 0.0   | 31.0  |
| 2898 | IPI00119784.1 | 118438 | NEFIPTNFEILSLEK                  | 897.9729  | 2 | 30 | c b4 P | 16.9  | 46.9  |
| 2899 | IPI00331650.1 | 27638  | KGEHLSDAFAR                      | 410.8791  | 3 | 30 | y6     | 23.8  | 53.8  |
| 2900 | IPI00112955.1 | 18770  | ASGVAVSDGVIK                     | 572.8140  | 2 | 22 |        | 0.0   | 22.0  |
| 2901 | IPI00223217.4 | 23563  | LAAIVAK                          | 685.4604  | 1 | 30 | b6     | 53.0  | 83.0  |
| 2902 | IPI00124742.1 | 27381  | ELPTEPPYTAYVGNLPGFNTVQGDIDAIFK   | 1070.8737 | 3 | 29 | b5 P   | 8.5   | 37.5  |
| 2903 | IPI00316314.1 | 64588  | TQDVEYMFVGVGIPVTEIALAAQELGIK     | 998.1990  | 3 | 29 | y8     | 11.6  | 40.6  |
| 2904 | IPI00108125.2 | 17049  | VHLVGIDIFTGK                     | 433.5868  | 3 | 29 | y4     | 57.1  | 86.1  |
| 2905 | IPI00132080.1 | 27465  | AAPAPSLISVFSSPQELGASLAQLVAQR     | 951.5191  | 3 | 18 |        | 0.0   | 18.0  |
| 2906 | IPI00132080.1 | 27465  | AAPAPSLISVFSSPQELGASLAQLVAQR     | 951.5191  | 3 | 28 |        | 0.0   | 28.0  |
| 2907 | IPI00169473.1 | 138950 | SGVHSHMTNTR                      | 409.5283  | 3 | 28 | y4     | 15.6  | 43.6  |
| 2908 | IPI00313817.1 | 26367  | GFSEGLWEIENNPVK                  | 910.9339  | 2 | 28 | P y4   | 29.5  | 57.5  |

|      |               |        |                              |           |   |    |        |      |       |
|------|---------------|--------|------------------------------|-----------|---|----|--------|------|-------|
| 2909 | IPI00409959.1 | 19962  | LYKQLSGK                     | 937.5422  | 1 | 27 |        | 0.0  | 27.0  |
| 2910 | IPI00351089.2 | 161873 | XCSASLIIR                    | 326.1774  | 3 | 15 |        | 0.0  | 15.0  |
| 2911 | IPI00136213.3 | 103486 | FHHSLTDHTR                   | 417.5392  | 3 | 27 | y5     | 27.2 | 54.2  |
| 2912 | IPI00120074.1 | 31790  | YGRPPDSHHSR                  | 436.8780  | 3 | 26 | c b6   | 23.8 | 49.8  |
| 2913 | IPI00116221.1 | 33019  | IFYTTTPVK                    | 535.3002  | 2 | 27 | y7     | 44.3 | 71.3  |
| 2914 | IPI00116221.1 | 33019  | SFTVTELR                     | 476.7583  | 2 | 25 | y4     | 15.6 | 40.6  |
| 2915 | IPI00123494.3 | 100937 | EWQELDDAEK                   | 631.7805  | 2 | 26 |        | 0.0  | 26.0  |
| 2916 | IPI00123975.1 | 61731  | TGLPLSTYFSAVK                | 692.3839  | 2 | 26 | y++11  | 27.2 | 53.2  |
| 2917 | IPI00116753.3 | 35360  | TIVAINKDPEAPIFQVADYGIVADLFK  | 983.5313  | 3 | 25 | y4     | 55.9 | 80.9  |
| 2918 | IPI00127207.1 | 42803  | YNRKPAETNLR                  | 454.5814  | 3 | 25 | c b4 P | 44.5 | 69.5  |
| 2919 | IPI00223800.3 | 12035  | DINLASFIEQVAVSMT             | 869.4384  | 2 | 25 |        | 0.0  | 25.0  |
| 2920 | IPI00128484.1 | 52049  | WFWDFAFR                     | 564.7666  | 2 | 24 | y6     | 46.8 | 70.8  |
| 2921 | IPI00122265.1 | 12917  | ENNAVYAFGLTAPPGSK            | 924.9766  | 2 | 21 | P y5   | 38.2 | 59.2  |
| 2922 | IPI00311395.1 | 45663  | YVSEVVIGAPYSVTAELLNHFK       | 813.1001  | 3 | 21 | b6     | 13.7 | 34.7  |
| 2923 | IPI00113214.1 | 96685  | IVILPDYLEIAR                 | 707.9201  | 2 | 20 | P y8   | 90.2 | 110.2 |
| 2924 | IPI00113214.1 | 96685  | QQDAQEFFLHLINMVER            | 707.0201  | 3 | 21 | y5     | 29.5 | 50.5  |
| 2925 | IPI00331156.2 | 17209  | TNISDEESEQATEMLVHNAQNLMQSVK  | 1016.8107 | 3 | 20 |        | 0.0  | 20.0  |
| 2926 | IPI00353928.2 | 430818 | NLSLQLK                      | 815.4943  | 1 | 24 | c b5   | 29.5 | 53.5  |
| 2927 | IPI00129685.1 | 19564  | GKLEEQKPER                   | 405.2225  | 3 | 27 | y++7   | 29.5 | 56.5  |
| 2928 | IPI00352763.2 | 772982 | IASQLTK                      | 761.4424  | 1 | 24 |        | 0.0  | 24.0  |
| 2929 | IPI00352763.2 | 772982 | IASQLTK                      | 761.4422  | 1 | 30 |        | 0.0  | 30.0  |
| 2930 | IPI00378205.2 | 353975 | NMLVKLGKIDSK                 | 681.3966  | 2 | 16 |        | 0.0  | 16.0  |
| 2931 | IPI00338604.1 | 229824 | KLDAQVQELHAK                 | 460.5980  | 3 | 18 |        | 0.0  | 18.0  |
| 2932 | IPI00123181.1 | 227414 | DLGEELEALKTELEDTLDDSTAAQQELR | 1006.8322 | 3 | 17 | y7     | 13.7 | 30.7  |
| 2933 | IPI00135085.3 | 21165  | MLGMIR                       | 762.4021  | 1 | 27 |        | 0.0  | 27.0  |
| 2934 | IPI00135085.3 | 21165  | RNEVWLVK                     | 522.3033  | 2 | 30 | c b6   | 53.0 | 83.0  |
| 2935 | IPI00312356.3 | 56031  | KIIEEAHSSGRK                 | 452.2533  | 3 | 22 | y5     | 15.6 | 37.6  |
| 2936 | IPI00312356.3 | 56031  | VAEHIHK                      | 417.2353  | 2 | 29 | c b6   | 38.2 | 67.2  |
| 2937 | IPI00379759.1 | 55687  | LGQGLK                       | 308.6869  | 2 | 21 |        | 0.0  | 21.0  |
| 2938 | IPI00124103.1 | 29464  | GRPIAGQGRK                   | 347.2091  | 3 | 23 |        | 0.0  | 23.0  |
| 2939 | IPI00108330.1 | 20998  | PTTLQVENISIGGVLVPLELK        | 741.0940  | 3 | 15 |        | 0.0  | 15.0  |
| 2940 | IPI00114667.1 | 36574  | VVVHPLVLLSVVDHFNR            | 486.7872  | 4 | 24 |        | 0.0  | 24.0  |
| 2941 | IPI00405012.1 | 12987  | LQFVMKSGKYVPGNKQTLK          | 728.7292  | 3 | 17 |        | 0.0  | 17.0  |
| 2942 | IPI00126860.2 | 116434 | AGNILLTEPGQVK                | 671.3745  | 2 | 16 |        | 0.0  | 16.0  |
| 2943 | IPI00314736.3 | 28691  | RIYLELR                      | 481.7929  | 2 | 17 | c b5   | 38.2 | 55.2  |
| 2944 | IPI00379346.1 | 59157  | MNLSLK                       | 353.6908  | 2 | 18 |        | 0.0  | 18.0  |
| 2945 | IPI00351821.1 | 52703  | VYPFWTPDIPLNSYVK             | 970.5071  | 2 | 18 | P y7   | 49.6 | 67.6  |
| 2946 | IPI00109221.2 | 70195  | QVIINLVNHKGSEK               | 789.9499  | 2 | 17 | c b7   | 13.7 | 30.7  |
| 2947 | IPI00274327.5 | 38394  | VDVLM EK                     | 417.2217  | 2 | 17 |        | 0.0  | 17.0  |
| 2948 | IPI00229120.3 | 69952  | LLPFEGPGK                    | 479.2721  | 2 | 18 |        | 0.0  | 18.0  |
| 2949 | IPI00119020.1 | 25118  | KMAKQQQMDAVRIMAK             | 919.9642  | 2 | 16 |        | 0.0  | 16.0  |



|      |               |        |                           |          |   |    |      |      |      |
|------|---------------|--------|---------------------------|----------|---|----|------|------|------|
| 2950 | IPI00134122.1 | 12254  | DAGVSVLR                  | 429.7342 | 2 | 30 |      | 0.0  | 30.0 |
| 2951 | IPI00111330.1 | 33816  | KLPNSPMKAQK               | 414.8985 | 3 | 15 |      | 0.0  | 15.0 |
| 2952 | IPI00315579.3 | 103024 | LTGSASMAK                 | 865.4571 | 1 | 30 |      | 0.0  | 30.0 |
| 2953 | IPI00267295.2 | 106689 | RLDVFEK                   | 453.7557 | 2 | 28 | b5   | 38.2 | 66.2 |
| 2954 | IPI00119520.1 | 36620  | DLNRAEEFAQK               | 660.8324 | 2 | 28 | c b7 | 13.7 | 41.7 |
| 2955 | IPI00354850.2 | 12231  | ATQAQIK                   | 380.7138 | 2 | 28 |      | 0.0  | 28.0 |
| 2956 | IPI00377286.1 | 69600  | EKLGFK                    | 361.2158 | 2 | 27 |      | 0.0  | 27.0 |
| 2957 | IPI00134853.2 | 49065  | AIKVMQR                   | 444.2636 | 2 | 27 | y4   | 1.1  | 28.1 |
| 2958 | IPI00111556.1 | 36123  | RGEPHVTR                  | 317.8421 | 3 | 29 |      | 0.0  | 29.0 |
| 2959 | IPI00133734.1 | 9688   | GEIRSATRVIGGPVTPRK        | 474.2770 | 4 | 25 |      | 0.0  | 25.0 |
| 2960 | IPI00314909.1 | 46185  | HREATAHLHK                | 400.5514 | 3 | 25 |      | 0.0  | 25.0 |
| 2961 | IPI00137594.2 | 14320  | CKEVQQIR                  | 531.2702 | 2 | 25 |      | 0.0  | 25.0 |
| 2962 | IPI00229301.1 | 53435  | TLLQAGR                   | 380.2219 | 2 | 25 |      | 0.0  | 25.0 |
| 2963 | IPI00355229.2 | 91670  | LNKLDNEDK                 | 601.3254 | 2 | 25 | c b7 | 1.6  | 26.6 |
| 2964 | IPI00127755.3 | 96497  | HINEIR                    | 391.7119 | 2 | 25 |      | 0.0  | 25.0 |
| 2965 | IPI00110556.1 | 57168  | QYTLGKAK                  | 454.7644 | 2 | 24 | c b7 | 5.4  | 29.4 |
| 2966 | IPI00227194.1 | 82731  | QIIRNIK                   | 443.2794 | 2 | 24 |      | 0.0  | 24.0 |
| 2967 | IPI00314510.1 | 35720  | HVAFLK                    | 357.7187 | 2 | 24 | c b5 | 38.2 | 62.2 |
| 2968 | IPI00381351.1 | 16604  | GCLELRNGIR                | 396.5510 | 3 | 24 | c b4 | 1.1  | 25.1 |
| 2969 | IPI00127820.1 | 23180  | MAGKSSLFK                 | 484.7633 | 2 | 24 |      | 0.0  | 24.0 |
| 2970 | IPI00331663.1 | 20367  | IQEGAAVLQK                | 528.8069 | 2 | 26 | y8   | 20.1 | 46.1 |
| 2971 | IPI00118817.1 | 192740 | SSKKRELQDSASR             | 746.4020 | 2 | 24 | c b7 | 1.6  | 25.6 |
| 2972 | IPI00116143.1 | 14993  | YESYANPSDPNPHLINQTQKENLRK | 592.2894 | 5 | 23 |      | 0.0  | 23.0 |
