# Supplementary material
Source: PubMed Central journal article supplement (PMC518757)
Supplement: pnas_101_37_13417__2.pdf [file pnas_101_37_13417__2.pdf]

**Table 3. Semi-trypsin 0.25 Da search**

| Peptide no. | IPI number    | Sequence                | m/z       | z | MS2-score | MS3-ion | MS3-score | Combined |
|-------------|---------------|-------------------------|-----------|---|-----------|---------|-----------|----------|
| 1           | IPI00120451.1 | AIGLPEDLIQK             | 598.9539  | 2 | 28        | P y7    | 95.65     | 123.7    |
| 2           | IPI00120451.1 | AIGLPEDLIQK             | 598.8489  | 2 | 42        | P y7    | 95.65     | 137.7    |
| 3           | IPI00120451.1 | AIGLPEDLIQK             | 598.8475  | 2 | 44        | P y7    | 95.65     | 139.7    |
| 4           | IPI00120451.1 | AIGLPEDLIQK             | 598.8488  | 2 | 46        | P y7    | 116       | 162.0    |
| 5           | IPI00120451.1 | AIGLPEDLIQK             | 598.8474  | 2 | 51        | P y7    | 95.65     | 146.7    |
| 6           | IPI00120451.1 | GVSEIVHEGK              | 352.1891  | 3 | 15        | y6      | 16.9      | 31.9     |
| 7           | IPI00120451.1 | GVSEIVHEGK              | 527.7807  | 2 | 53        | y8      | 58.1      | 111.1    |
| 8           | IPI00120451.1 | GVSEIVHEGK              | 527.7807  | 2 | 58        | y5      | 57.05     | 115.1    |
| 9           | IPI00120451.1 | GVSEIVHEGKK             | 394.8877  | 3 | 17        | y4      | 0.9       | 17.9     |
| 10          | IPI00120451.1 | GVSEIVHEGKK             | 591.8279  | 2 | 54        | y6      | 52.95     | 107.0    |
| 11          | IPI00120451.1 | KIKLTITYGP              | 567.3072  | 2 | 17        | y6      | 6.6       | 23.6     |
| 12          | IPI00120451.1 | LTITYGPK                | 892.5302  | 1 | 29        | y5      | 38.2      | 67.2     |
| 13          | IPI00120451.1 | LTITYGPK                | 892.5302  | 1 | 29        | y5      | 38.2      | 67.2     |
| 14          | IPI00120451.1 | MNFSGK                  | 725.3350  | 1 | 20        |         | 0         | 20.0     |
| 15          | IPI00120451.1 | MNFSGK                  | 725.3316  | 1 | 25        |         | 0         | 25.0     |
| 16          | IPI00120451.1 | MVTTFK                  | 363.6965  | 2 | 16        | y4      | 44.5      | 60.5     |
| 17          | IPI00120451.1 | MVTTFK                  | 726.3856  | 1 | 21        |         | 0         | 21.0     |
| 18          | IPI00120451.1 | MVTTFK                  | 726.3855  | 1 | 24        |         | 0         | 24.0     |
| 19          | IPI00120451.1 | SVTELANGDTITNTMTLGDIVYK | 796.0687  | 3 | 15        |         | 0         | 15.0     |
| 20          | IPI00120451.1 | SVTELANGDTITNTMTLGDIVYK | 1193.5906 | 2 | 22        | y6      | 29.45     | 51.5     |
| 21          | IPI00120451.1 | SVTELANGDTITNTMTLGDIVYK | 796.3984  | 3 | 26        | y6      | 69.75     | 95.8     |
| 22          | IPI00120451.1 | SVTELANGDTITNTMTLGDIVYK | 1193.5955 | 2 | 59        | y8      | 46.75     | 105.8    |
| 23          | IPI00120451.1 | SVTELANGDTITNTMTLGDIVYK | 1193.5966 | 2 | 61        | y6      | 69.75     | 130.8    |
| 24          | IPI00120451.1 | SVTELANGDTITNTMTLGDIVYK | 1193.5966 | 2 | 64        | y8      | 44.3      | 108.3    |
| 25          | IPI00120451.1 | SVTELANGDTITNTMTLGDIVYK | 1194.0949 | 2 | 66        | y6      | 75.6      | 141.6    |
| 26          | IPI00120451.1 | SVTELANGDTITNTMTLGDIVYK | 1193.5966 | 2 | 66        | y8      | 12.15     | 78.2     |
| 27          | IPI00120451.1 | SVTELANGDTITNTMTLGDIVYK | 1194.0951 | 2 | 67        | y8      | 20.1      | 87.1     |
| 28          | IPI00120451.1 | SVTELANGDTITNTMTLGDIVYK | 1194.0965 | 2 | 67        | y8      | 33.75     | 100.8    |
| 29          | IPI00120451.1 | SVTELANGDTITNTMTLGDIVYK | 1193.5961 | 2 | 69        | y6      | 69.75     | 138.8    |
| 30          | IPI00120451.1 | SVTELANGDTITNTMTLGDIVYK | 1193.5967 | 2 | 69        | y7      | 57.05     | 126.1    |
| 31          | IPI00120451.1 | SVTELANGDTITNTMTLGDIVYK | 1193.5963 | 2 | 69        | y4      | 41.95     | 111.0    |
| 32          | IPI00120451.1 | SVTELANGDTITNTMTLGDIVYK | 1193.5952 | 2 | 69        | y8      | 21.2      | 90.2     |
| 33          | IPI00120451.1 | SVTELANGDTITNTMTLGDIVYK | 1193.5969 | 2 | 72        |         | 0         | 72.0     |
| 34          | IPI00120451.1 | SVTELANGDTITNTMTLGDIVYK | 1193.5961 | 2 | 72        | y8      | 44.3      | 116.3    |
| 35          | IPI00120451.1 | SVTELANGDTITNTMTLGDIVYK | 1194.0954 | 2 | 72        | y8      | 58.1      | 130.1    |
| 36          | IPI00120451.1 | SVTELANGDTITNTMTLGDIVYK | 1193.5898 | 2 | 72        | y8      | 73.4      | 145.4    |
| 37          | IPI00120451.1 | SVTELANGDTITNTMTLGDIVYK | 1193.5959 | 2 | 72        | y8      | 61.35     | 133.4    |
| 38          | IPI00120451.1 | SVTELANGDTITNTMTLGDIVYK | 1193.5953 | 2 | 72        | y8      | 44.3      | 116.3    |

|    |               |                         |           |   |    |    |       |       |
|----|---------------|-------------------------|-----------|---|----|----|-------|-------|
| 39 | IPI00120451.1 | SVTELANGDTITNTMTLGDIVYK | 1193.5961 | 2 | 72 | y6 | 69.75 | 141.8 |
| 40 | IPI00120451.1 | SVTELANGDTITNTMTLGDIVYK | 1193.5964 | 2 | 72 | y8 | 31.95 | 104.0 |
| 41 | IPI00120451.1 | SVTELANGDTITNTMTLGDIVYK | 1193.5963 | 2 | 72 | y8 | 33.75 | 105.8 |
| 42 | IPI00120451.1 | SVTELANGDTITNTMTLGDIVYK | 1193.5964 | 2 | 73 | y8 | 33.75 | 106.8 |
| 43 | IPI00120451.1 | SVTELANGDTITNTMTLGDIVYK | 1193.5954 | 2 | 74 | y8 | 58.1  | 132.1 |
| 44 | IPI00120451.1 | SVTELANGDTITNTMTLGDIVYK | 1193.5959 | 2 | 75 | y8 | 31.95 | 107.0 |
| 45 | IPI00120451.1 | SVTELANGDTITNTMTLGDIVYK | 1193.5960 | 2 | 75 | y8 | 33.75 | 108.8 |
| 46 | IPI00120451.1 | SVTELANGDTITNTMTLGDIVYK | 1193.5963 | 2 | 76 | y8 | 12.85 | 88.9  |
| 47 | IPI00120451.1 | SVTELANGDTITNTMTLGDIVYK | 1193.5973 | 2 | 77 | y8 | 33.75 | 110.8 |
| 48 | IPI00120451.1 | SVTELANGDTITNTMTLGDIVYK | 1194.0951 | 2 | 77 | y8 | 30.4  | 107.4 |
| 49 | IPI00120451.1 | SVTELANGDTITNTMTLGDIVYK | 1193.5968 | 2 | 78 | y8 | 55.3  | 133.3 |
| 50 | IPI00120451.1 | SVTELANGDTITNTMTLGDIVYK | 1193.5964 | 2 | 78 | y6 | 52.95 | 131.0 |
| 51 | IPI00120451.1 | SVTELANGDTITNTMTLGDIVYK | 1193.5963 | 2 | 78 | y8 | 31.95 | 110.0 |
| 52 | IPI00120451.1 | SVTELANGDTITNTMTLGDIVYK | 1193.5962 | 2 | 78 |    | 0     | 78.0  |
| 53 | IPI00120451.1 | SVTELANGDTITNTMTLGDIVYK | 1193.5964 | 2 | 78 | y8 | 12.15 | 90.2  |
| 54 | IPI00120451.1 | SVTELANGDTITNTMTLGDIVYK | 1193.5951 | 2 | 79 | y8 | 55.3  | 134.3 |
| 55 | IPI00120451.1 | SVTELANGDTITNTMTLGDIVYK | 1193.5963 | 2 | 79 | y8 | 44.3  | 123.3 |
| 56 | IPI00120451.1 | SVTELANGDTITNTMTLGDIVYK | 1193.5966 | 2 | 79 | y6 | 69.75 | 148.8 |
| 57 | IPI00120451.1 | SVTELANGDTITNTMTLGDIVYK | 1193.5969 | 2 | 79 |    | 0     | 79.0  |
| 58 | IPI00120451.1 | SVTELANGDTITNTMTLGDIVYK | 1193.5958 | 2 | 79 | y8 | 22.4  | 101.4 |
| 59 | IPI00120451.1 | SVTELANGDTITNTMTLGDIVYK | 1193.5956 | 2 | 80 | y8 | 73.4  | 153.4 |
| 60 | IPI00120451.1 | SVTELANGDTITNTMTLGDIVYK | 1193.5960 | 2 | 81 | y6 | 89    | 170.0 |
| 61 | IPI00120451.1 | SVTELANGDTITNTMTLGDIVYK | 1193.5965 | 2 | 81 | y8 | 30.4  | 111.4 |
| 62 | IPI00120451.1 | SVTELANGDTITNTMTLGDIVYK | 1193.5964 | 2 | 81 | y8 | 30.4  | 111.4 |
| 63 | IPI00120451.1 | SVTELANGDTITNTMTLGDIVYK | 1193.5961 | 2 | 82 | y8 | 22.4  | 104.4 |
| 64 | IPI00120451.1 | SVTELANGDTITNTMTLGDIVYK | 1193.5964 | 2 | 83 | y8 | 55.3  | 138.3 |
| 65 | IPI00120451.1 | SVTELANGDTITNTMTLGDIVYK | 1193.5952 | 2 | 83 | y8 | 31.95 | 115.0 |
| 66 | IPI00120451.1 | SVTELANGDTITNTMTLGDIVYK | 1193.5964 | 2 | 83 | y6 | 69.75 | 152.8 |
| 67 | IPI00120451.1 | SVTELANGDTITNTMTLGDIVYK | 1193.5967 | 2 | 83 | y6 | 52.95 | 136.0 |
| 68 | IPI00120451.1 | SVTELANGDTITNTMTLGDIVYK | 1193.5966 | 2 | 83 | y8 | 20.1  | 103.1 |
| 69 | IPI00120451.1 | SVTELANGDTITNTMTLGDIVYK | 1193.5962 | 2 | 83 |    | 0     | 83.0  |
| 70 | IPI00120451.1 | SVTELANGDTITNTMTLGDIVYK | 1193.5965 | 2 | 84 | y8 | 31.95 | 116.0 |
| 71 | IPI00120451.1 | SVTELANGDTITNTMTLGDIVYK | 1193.5964 | 2 | 85 | y8 | 33.75 | 118.8 |
| 72 | IPI00120451.1 | SVTELANGDTITNTMTLGDIVYK | 1193.5964 | 2 | 86 | y8 | 55.3  | 141.3 |
| 73 | IPI00120451.1 | SVTELANGDTITNTMTLGDIVYK | 1193.5956 | 2 | 86 | y4 | 18.5  | 104.5 |
| 74 | IPI00120451.1 | SVTELANGDTITNTMTLGDIVYK | 1193.5961 | 2 | 86 | y8 | 46.75 | 132.8 |
| 75 | IPI00120451.1 | SVTELANGDTITNTMTLGDIVYK | 1193.5957 | 2 | 86 |    | 0     | 86.0  |
| 76 | IPI00120451.1 | SVTELANGDTITNTMTLGDIVYK | 1193.5967 | 2 | 86 | y7 | 46.75 | 132.8 |
| 77 | IPI00120451.1 | SVTELANGDTITNTMTLGDIVYK | 1193.5951 | 2 | 87 | y7 | 35.8  | 122.8 |
| 78 | IPI00120451.1 | SVTELANGDTITNTMTLGDIVYK | 1193.5955 | 2 | 88 | y8 | 46.75 | 134.8 |
| 79 | IPI00120451.1 | SVTELANGDTITNTMTLGDIVYK | 1193.5954 | 2 | 88 | y6 | 57.05 | 145.1 |

|     |               |                         |           |   |     |      |       |       |
|-----|---------------|-------------------------|-----------|---|-----|------|-------|-------|
| 80  | IPI00120451.1 | SVTELANGDTITNTMTLGDIVYK | 1193.5960 | 2 | 88  | y8   | 31.95 | 120.0 |
| 81  | IPI00120451.1 | SVTELANGDTITNTMTLGDIVYK | 1193.5950 | 2 | 88  | y8   | 31.95 | 120.0 |
| 82  | IPI00120451.1 | SVTELANGDTITNTMTLGDIVYK | 1194.0945 | 2 | 89  | y8   | 42.15 | 131.2 |
| 83  | IPI00120451.1 | SVTELANGDTITNTMTLGDIVYK | 1193.5943 | 2 | 89  | y8   | 77.6  | 166.6 |
| 84  | IPI00120451.1 | SVTELANGDTITNTMTLGDIVYK | 1193.5964 | 2 | 91  | y8   | 44.3  | 135.3 |
| 85  | IPI00120451.1 | SVTELANGDTITNTMTLGDIVYK | 1194.0950 | 2 | 94  |      | 0     | 94.0  |
| 86  | IPI00120451.1 | SVTELANGDTITNTMTLGDIVYK | 1193.5952 | 2 | 94  | y8   | 31.95 | 126.0 |
| 87  | IPI00120451.1 | SVTELANGDTITNTMTLGDIVYK | 1193.5955 | 2 | 94  | y6   | 69.75 | 163.8 |
| 88  | IPI00120451.1 | SVTELANGDTITNTMTLGDIVYK | 1193.5958 | 2 | 94  | y8   | 33.75 | 127.8 |
| 89  | IPI00120451.1 | SVTELANGDTITNTMTLGDIVYK | 1193.5954 | 2 | 94  | y8   | 33.75 | 127.8 |
| 90  | IPI00120451.1 | SVTELANGDTITNTMTLGDIVYK | 1193.5957 | 2 | 94  | y8   | 42.15 | 136.2 |
| 91  | IPI00120451.1 | SVTELANGDTITNTMTLGDIVYK | 1193.5962 | 2 | 94  | y8   | 21.2  | 115.2 |
| 92  | IPI00120451.1 | SVTELANGDTITNTMTLGDIVYK | 1193.5960 | 2 | 94  | y8   | 44.3  | 138.3 |
| 93  | IPI00120451.1 | SVTELANGDTITNTMTLGDIVYK | 1193.5957 | 2 | 95  | y8   | 21.2  | 116.2 |
| 94  | IPI00120451.1 | SVTELANGDTITNTMTLGDIVYK | 1193.5955 | 2 | 97  | y7   | 46.75 | 143.8 |
| 95  | IPI00120451.1 | SVTELANGDTITNTMTLGDIVYK | 1193.5963 | 2 | 97  | y8   | 35.8  | 132.8 |
| 96  | IPI00120451.1 | SVTELANGDTITNTMTLGDIVYK | 1193.5960 | 2 | 98  | y6   | 52.95 | 151.0 |
| 97  | IPI00120451.1 | SVTELANGDTITNTMTLGDIVYK | 1193.5963 | 2 | 99  | y8   | 42.15 | 141.2 |
| 98  | IPI00120451.1 | SVTELANGDTITNTMTLGDIVYK | 1193.5947 | 2 | 100 |      | 0     | 100.0 |
| 99  | IPI00120451.1 | SVTELANGDTITNTMTLGDIVYK | 1193.5966 | 2 | 102 | y8   | 46.75 | 148.8 |
| 100 | IPI00120451.1 | SVTELANGDTITNTMTLGDIVYK | 1193.5960 | 2 | 111 | y8   | 31.95 | 143.0 |
| 101 | IPI00120451.1 | SVTELANGDTITNTMTLGDIVYK | 1193.5958 | 2 | 111 | y8   | 46.75 | 157.8 |
| 102 | IPI00120451.1 | SVTELANGDTITNTMTLGDIVYK | 1193.5958 | 2 | 116 | y8   | 33.75 | 149.8 |
| 103 | IPI00120451.1 | SVTELANGDTITNTMTLGDIVYK | 1193.5962 | 2 | 135 |      | 0     | 135.0 |
| 104 | IPI00120451.1 | YQLQSQENFEPFMK          | 894.9162  | 2 | 42  | y5   | 29.45 | 71.5  |
| 105 | IPI00120451.1 | YQLQSQENFEPFMK          | 895.4200  | 2 | 50  |      | 0     | 50.0  |
| 106 | IPI00120451.1 | YQLQSQENFEPFMK          | 903.4181  | 2 | 53  |      | 0     | 53.0  |
| 107 | IPI00120451.1 | YQLQSQENFEPFMK          | 894.9161  | 2 | 56  | P y4 | 62.3  | 118.3 |
| 108 | IPI00120451.1 | YQLQSQENFEPFMK          | 894.9595  | 2 | 59  |      | 0     | 59.0  |
| 109 | IPI00120451.1 | YQLQSQENFEPFMK          | 894.9595  | 2 | 59  | y5   | 32.3  | 91.3  |
| 110 | IPI00120451.1 | YQLQSQENFEPFMK          | 895.4165  | 2 | 60  | P y4 | 62.3  | 122.3 |
| 111 | IPI00120451.1 | YQLQSQENFEPFMK          | 895.4450  | 2 | 63  | P y4 | 62.3  | 125.3 |
| 112 | IPI00120451.1 | YQLQSQENFEPFMK          | 895.4201  | 2 | 65  | P y4 | 62.3  | 127.3 |
| 113 | IPI00120451.1 | YQLQSQENFEPFMK          | 895.4493  | 2 | 65  | y5   | 49.1  | 114.1 |
| 114 | IPI00120451.1 | YQLQSQENFEPFMK          | 894.9161  | 2 | 65  | P y4 | 44.5  | 109.5 |
| 115 | IPI00120451.1 | YQLQSQENFEPFMK          | 895.4199  | 2 | 68  | P y4 | 62.3  | 130.3 |
| 116 | IPI00120451.1 | YQLQSQENFEPFMK          | 895.4166  | 2 | 88  |      | 0     | 88.0  |
| 117 | IPI00283531.4 | AFLSSPEHVNRPINGNGK      | 646.6683  | 3 | 15  |      | 0     | 15.0  |
| 118 | IPI00283531.4 | AFLSSPEHVNRPINGNGK      | 646.3373  | 3 | 21  |      | 0     | 21.0  |
| 119 | IPI00283531.4 | AFLSSPEHVNRPINGNGKQ     | 689.3530  | 3 | 15  |      | 0     | 15.0  |
| 120 | IPI00283531.4 | AFLSSPEHVNRPINGNGKQ     | 689.6814  | 3 | 15  |      | 0     | 15.0  |

|     |               |                      |           |   |     |         |       |       |
|-----|---------------|----------------------|-----------|---|-----|---------|-------|-------|
| 121 | IPI00283531.4 | AFLSSPEHVNRPINGNGKQ  | 689.0278  | 3 | 16  | P y++14 | 10.05 | 26.1  |
| 122 | IPI00283531.4 | AFLSSPEHVNRPINGNGKQ  | 689.6900  | 3 | 16  | y6      | 14.55 | 30.6  |
| 123 | IPI00283531.4 | AFLSSPEHVNRPINGNGKQ  | 690.0186  | 3 | 18  | y6      | 6.2   | 24.2  |
| 124 | IPI00283531.4 | AFLSSPEHVNRPINGNGKQ  | 689.3557  | 3 | 20  |         | 0     | 20.0  |
| 125 | IPI00283531.4 | AFLSSPEHVNRPINGNGKQ  | 689.6874  | 3 | 21  | y5      | 16.9  | 37.9  |
| 126 | IPI00283531.4 | AFLSSPEHVNRPINGNGKQ  | 689.6874  | 3 | 22  |         | 0     | 22.0  |
| 127 | IPI00283531.4 | AFLSSPEHVNRPINGNGKQ  | 689.3590  | 3 | 23  | y++15   | 4.95  | 28.0  |
| 128 | IPI00283531.4 | AFLSSPEHVNRPINGNGKQ  | 689.3591  | 3 | 26  |         | 0     | 26.0  |
| 129 | IPI00283531.4 | AFLSSPEHVNRPINGNGKQ  | 1034.0237 | 2 | 38  |         | 0     | 38.0  |
| 130 | IPI00283531.4 | AFLSSPEHVNRPINGNGKQ  | 1034.0238 | 2 | 43  | y5      | 7.7   | 50.7  |
| 131 | IPI00283531.4 | AFLSSPEHVNRPINGNGKQ  | 1033.5317 | 2 | 44  | P y++14 | 4.8   | 48.8  |
| 132 | IPI00283531.4 | AFLSSPEHVNRPINGNGKQ  | 1034.0237 | 2 | 47  |         | 0     | 47.0  |
| 133 | IPI00283531.4 | AFLSSPEHVNRPINGNGKQ  | 1034.5158 | 2 | 50  |         | 0     | 50.0  |
| 134 | IPI00283531.4 | ALPGHLKPFETLLSQNQGGK | 534.5459  | 4 | 15  | y7      | 82.65 | 97.7  |
| 135 | IPI00283531.4 | ALPGHLKPFETLLSQNQGGK | 712.7377  | 3 | 22  | y8      | 5.35  | 27.4  |
| 136 | IPI00283531.4 | ALPGHLKPFETLLSQNQGGK | 712.7286  | 3 | 26  | y8      | 90.2  | 116.2 |
| 137 | IPI00283531.4 | ALPGHLKPFETLLSQNQGGK | 1068.5847 | 2 | 28  | c b6    | 27.2  | 55.2  |
| 138 | IPI00283531.4 | ALPGHLKPFETLLSQNQGGK | 712.7286  | 3 | 31  | y8      | 58.1  | 89.1  |
| 139 | IPI00283531.4 | ALPGHLKPFETLLSQNQGGK | 712.4055  | 3 | 32  | y7      | 46.75 | 78.8  |
| 140 | IPI00283531.4 | ALPGHLKPFETLLSQNQGGK | 712.4029  | 3 | 34  | y5      | 27.2  | 61.2  |
| 141 | IPI00283531.4 | ALPGHLKPFETLLSQNQGGK | 712.4029  | 3 | 36  | y8      | 58.1  | 94.1  |
| 142 | IPI00283531.4 | ALPGHLKPFETLLSQNQGGK | 1068.5850 | 2 | 41  | y7      | 1.6   | 42.6  |
| 143 | IPI00283531.4 | ALPGHLKPFETLLSQNQGGK | 1068.5851 | 2 | 42  | y7      | 25.35 | 67.4  |
| 144 | IPI00283531.4 | ALPGHLKPFETLLSQNQGGK | 1068.5850 | 2 | 44  | c b6    | 38.2  | 82.2  |
| 145 | IPI00283531.4 | ALPGHLKPFETLLSQNQGGK | 1068.5849 | 2 | 44  | c b6    | 6.6   | 50.6  |
| 146 | IPI00283531.4 | ALPGHLKPFETLLSQNQGGK | 1068.5850 | 2 | 49  |         | 0     | 49.0  |
| 147 | IPI00283531.4 | EAAQMDMVNDGVEDLR     | 896.8988  | 2 | 104 | y6      | 25.35 | 129.4 |
| 148 | IPI00283531.4 | EAAQMDMVNDGVEDLRGK   | 660.3086  | 3 | 18  |         | 0     | 18.0  |
| 149 | IPI00283531.4 | EAAQMDMVNDGVEDLRGK   | 660.6391  | 3 | 22  |         | 0     | 22.0  |
| 150 | IPI00283531.4 | EAAQMDMVNDGVEDLRGK   | 659.9718  | 3 | 36  |         | 0     | 36.0  |
| 151 | IPI00283531.4 | EAAQMDMVNDGVEDLRGK   | 665.6456  | 3 | 37  |         | 0     | 37.0  |
| 152 | IPI00283531.4 | EAAQMDMVNDGVEDLRGK   | 659.9717  | 3 | 38  |         | 0     | 38.0  |
| 153 | IPI00283531.4 | EAAQMDMVNDGVEDLRGK   | 659.9717  | 3 | 41  |         | 0     | 41.0  |
| 154 | IPI00283531.4 | EAAQMDMVNDGVEDLRGK   | 989.9548  | 2 | 53  | y8      | 31.95 | 85.0  |
| 155 | IPI00283531.4 | EAAQMDMVNDGVEDLRGK   | 989.9541  | 2 | 54  | y8      | 46.75 | 100.8 |
| 156 | IPI00283531.4 | EAAQMDMVNDGVEDLRGK   | 989.9548  | 2 | 74  | y8      | 31.95 | 106.0 |
| 157 | IPI00283531.4 | FEDGDLTLYQSNAILR     | 928.4668  | 2 | 24  | y8      | 11    | 35.0  |
| 158 | IPI00283531.4 | FEDGDLTLYQSNAILR     | 619.3141  | 3 | 38  | c b8    | 11.55 | 49.6  |
| 159 | IPI00283531.4 | FEDGDLTLYQSNAILR     | 619.3235  | 3 | 46  |         | 0     | 46.0  |
| 160 | IPI00283531.4 | FEDGDLTLYQSNAILR     | 928.4664  | 2 | 60  | y8      | 19.15 | 79.2  |
| 161 | IPI00283531.4 | FEDGDLTLYQSNAILR     | 928.4981  | 2 | 61  | y8      | 40.2  | 101.2 |

|     |               |                                       |           |   |    |       |       |       |
|-----|---------------|---------------------------------------|-----------|---|----|-------|-------|-------|
| 162 | IPI00283531.4 | FEDGDLTYQSNAILR                       | 928.4670  | 2 | 64 | y6    | 23.75 | 87.8  |
| 163 | IPI00283531.4 | FEDGDLTYQSNAILR                       | 928.4664  | 2 | 66 | y8    | 19.15 | 85.2  |
| 164 | IPI00283531.4 | FEDGDLTYQSNAILR                       | 928.4672  | 2 | 67 | y7    | 12.85 | 79.9  |
| 165 | IPI00283531.4 | FEDGDLTYQSNAILR                       | 928.4710  | 2 | 68 | y6    | 41    | 109.0 |
| 166 | IPI00283531.4 | FEDGDLTYQSNAILR                       | 928.4671  | 2 | 69 | y7    | 46.75 | 115.8 |
| 167 | IPI00283531.4 | FEDGDLTYQSNAILR                       | 927.9657  | 2 | 69 | y6    | 27.2  | 96.2  |
| 168 | IPI00283531.4 | FEDGDLTYQSNAILR                       | 928.4669  | 2 | 70 | c b8  | 44.3  | 114.3 |
| 169 | IPI00283531.4 | FEDGDLTYQSNAILR                       | 928.4667  | 2 | 72 | y8    | 19.15 | 91.2  |
| 170 | IPI00283531.4 | FEDGDLTYQSNAILR                       | 928.4707  | 2 | 75 | y8    | 28.95 | 104.0 |
| 171 | IPI00283531.4 | FEDGDLTYQSNAILR                       | 927.9657  | 2 | 78 | y8    | 33.75 | 111.8 |
| 172 | IPI00283531.4 | FEDGDLTYQSNAILR                       | 928.0074  | 2 | 89 | c b8  | 22.4  | 111.4 |
| 173 | IPI00283531.4 | FEDGDLTYQSNAILR                       | 927.9658  | 2 | 92 |       | 0     | 92.0  |
| 174 | IPI00283531.4 | FEDGDLTYQSNAILR                       | 927.9656  | 2 | 93 | y6    | 38.2  | 131.2 |
| 175 | IPI00283531.4 | LSARPK                                | 336.2137  | 2 | 24 | y5    | 16.9  | 40.9  |
| 176 | IPI00283531.4 | MDMVNDGVEDLRGK                        | 789.8805  | 2 | 40 | y8    | 21.2  | 61.2  |
| 177 | IPI00283531.4 | MLLADQGGQSWK                          | 638.8205  | 2 | 45 | y8    | 55.3  | 100.3 |
| 178 | IPI00283531.4 | MLLADQGGQSWKEEVVTIDTWMQGLLK           | 756.1373  | 4 | 26 |       | 0     | 26.0  |
| 179 | IPI00283531.4 | MLLADQGGQSWKEEVVTIDTWMQGLLK           | 756.1395  | 4 | 34 |       | 0     | 34.0  |
| 180 | IPI00283531.4 | MLLADQGGQSWKEEVVTIDTWMQGLLK           | 1007.5187 | 3 | 46 | y4    | 15.6  | 61.6  |
| 181 | IPI00283531.4 | MLLADQGGQSWKEEVVTIDTWMQGLLK           | 1007.5190 | 3 | 55 | y7    | 22.4  | 77.4  |
| 182 | IPI00283531.4 | MLLADQGGQSWKEEVVTIDTWMQGLLKPTCLYGQLPK | 1045.7422 | 4 | 46 |       | 0     | 46.0  |
| 183 | IPI00283531.4 | MLLADQGGQSWKEEVVTIDTWMQGLLKPTCLYGQLPK | 1045.5368 | 4 | 49 | y++16 | 14.9  | 63.9  |
| 184 | IPI00283531.4 | MPPYTIVYFPVR                          | 741.8938  | 2 | 48 | y5    | 14.55 | 62.6  |
| 185 | IPI00283531.4 | NQREAAQMDMVNDGVEDLRGK                 | 793.0375  | 3 | 50 | y4    | 7.1   | 57.1  |
| 186 | IPI00283531.4 | NQREAAQMDMVNDGVEDLRGK                 | 793.0398  | 3 | 53 | y8    | 33.75 | 86.8  |
| 187 | IPI00283531.4 | PPYTIVYFPVR                           | 676.3740  | 2 | 60 | y7    | 46.75 | 106.8 |
| 188 | IPI00283531.4 | SLGLYGK                               | 369.2132  | 2 | 21 | y5    | 41    | 62.0  |
| 189 | IPI00283531.4 | SLGLYGK                               | 737.4191  | 1 | 21 |       | 0     | 21.0  |
| 190 | IPI00283531.4 | YTIVYFPVR                             | 579.3317  | 2 | 35 | y5    | 52.95 | 88.0  |
| 191 | IPI00283531.4 | YVTLIYTNYENGK                         | 789.8864  | 2 | 20 |       | 0     | 20.0  |
| 192 | IPI00283531.4 | YVTLIYTNYENGK                         | 789.4347  | 2 | 33 | y8    | 31.95 | 65.0  |
| 193 | IPI00283531.4 | YVTLIYTNYENGK                         | 789.8862  | 2 | 34 |       | 0     | 34.0  |
| 194 | IPI00283531.4 | YVTLIYTNYENGK                         | 789.9239  | 2 | 36 |       | 0     | 36.0  |
| 195 | IPI00283531.4 | YVTLIYTNYENGK                         | 789.4102  | 2 | 44 | y8    | 58.1  | 102.1 |
| 196 | IPI00283531.4 | YVTLIYTNYENGK                         | 789.4102  | 2 | 51 | y8    | 73.4  | 124.4 |
| 197 | IPI00283531.4 | YVTLIYTNYENGK                         | 789.9198  | 2 | 52 |       | 0     | 52.0  |
| 198 | IPI00283531.4 | YVTLIYTNYENGKNDYVK                    | 733.4053  | 3 | 17 | b5    | 6.2   | 23.2  |
| 199 | IPI00283531.4 | YVTLIYTNYENGKNDYVK                    | 733.4018  | 3 | 17 | y++10 | 1.75  | 18.8  |
| 200 | IPI00283531.4 | YVTLIYTNYENGKNDYVK                    | 733.3661  | 3 | 24 |       | 0     | 24.0  |
| 201 | IPI00283531.4 | YVTLIYTNYENGKNDYVK                    | 733.7046  | 3 | 25 | b5    | 32.3  | 57.3  |
| 202 | IPI00283531.4 | YVTLIYTNYENGKNDYVK                    | 733.3661  | 3 | 26 | b5    | 27.2  | 53.2  |

|     |               |                        |           |   |    |         |       |       |
|-----|---------------|------------------------|-----------|---|----|---------|-------|-------|
| 203 | IPI00283531.4 | YVTLIYTNYENGKNDYVK     | 733.3824  | 3 | 27 | b5      | 32.3  | 59.3  |
| 204 | IPI00283531.4 | YVTLIYTNYENGKNDYVK     | 733.7047  | 3 | 34 | b5      | 36.1  | 70.1  |
| 205 | IPI00283531.4 | YVTLIYTNYENGKNDYVK     | 733.6947  | 3 | 49 |         | 0     | 49.0  |
| 206 | IPI00283531.4 | YVTLIYTNYENGKNDYVK     | 1100.0393 | 2 | 64 | y7      | 35.8  | 99.8  |
| 207 | IPI00283531.4 | YVTLIYTNYENGKNDYVK     | 1099.5481 | 2 | 90 | y7      | 27.2  | 117.2 |
| 208 | IPI00323816.2 | DGFNPAHVEAGLYGSR       | 845.4345  | 2 | 42 | y++15   | 83.4  | 125.4 |
| 209 | IPI00323816.2 | GSFVLLDGETFEVK         | 770.8984  | 2 | 39 | y8      | 31.95 | 71.0  |
| 210 | IPI00323816.2 | GTWEKPGGASPMGYDFWYQPR  | 811.0382  | 3 | 24 | y4      | 15.6  | 39.6  |
| 211 | IPI00323816.2 | GTWEKPGGASPMGYDFWYQPR  | 811.0382  | 3 | 29 | c b10 P | 18.3  | 47.3  |
| 212 | IPI00323816.2 | HEIIQTLQMTDGLIPLEIR    | 741.0743  | 3 | 30 | b6      | 1.4   | 31.4  |
| 213 | IPI00323816.2 | HEIIQTLQMTDGLIPLEIR    | 741.0940  | 3 | 39 |         | 0     | 39.0  |
| 214 | IPI00323816.2 | HEIIQTLQMTDGLIPLEIR    | 1111.1101 | 2 | 59 | y8      | 21.2  | 80.2  |
| 215 | IPI00323816.2 | HNVMVSTEWAAPNVFK       | 610.6380  | 3 | 18 | y6      | 69.75 | 87.8  |
| 216 | IPI00323816.2 | HNVMVSTEWAAPNVFK       | 610.6464  | 3 | 21 | y6      | 52.95 | 74.0  |
| 217 | IPI00323816.2 | HNVMVSTEWAAPNVFK       | 915.9563  | 2 | 59 | c b8    | 5.35  | 64.4  |
| 218 | IPI00323816.2 | HNVMVSTEWAAPNVFK       | 915.4540  | 2 | 78 | P y5    | 62.3  | 140.3 |
| 219 | IPI00323816.2 | HNVMVSTEWAAPNVFK       | 915.9530  | 2 | 87 | c b8    | 22.4  | 109.4 |
| 220 | IPI00323816.2 | IFVVDWQR               | 575.7971  | 2 | 20 | y6      | 49.6  | 69.6  |
| 221 | IPI00323816.2 | IYVVDVGSEPR            | 617.3288  | 2 | 66 | y9      | 27.7  | 93.7  |
| 222 | IPI00323816.2 | IYVVDVGSEPR            | 617.3287  | 2 | 71 | y5      | 41    | 112.0 |
| 223 | IPI00323816.2 | LILPGLMSSR             | 543.8204  | 2 | 40 | P y7    | 61.35 | 101.4 |
| 224 | IPI00323816.2 | LNPNFLVDFGKEPLGALAHCLR | 850.1289  | 3 | 38 | P y8    | 30.4  | 68.4  |
| 225 | IPI00323816.2 | LNPNFLVDFGKEPLGALAHCLR | 850.1288  | 3 | 47 | P y8    | 33.75 | 80.8  |
| 226 | IPI00323816.2 | LNPNFLVDFGKEPLGALAHCLR | 850.1318  | 3 | 55 |         | 0     | 55.0  |
| 227 | IPI00323816.2 | NEEGTWSVEK             | 589.7704  | 2 | 37 | y7      | 22.4  | 59.4  |
| 228 | IPI00323816.2 | NEEGTWSVEK             | 589.7705  | 2 | 39 | y8      | 58.1  | 97.1  |
| 229 | IPI00323816.2 | NTGTEAPDYLATVDVDPK     | 953.9603  | 2 | 61 | y5      | 14.55 | 75.6  |
| 230 | IPI00323816.2 | NTGTEAPDYLATVDVDPK     | 953.9604  | 2 | 63 |         | 0     | 63.0  |
| 231 | IPI00323816.2 | NTGTEAPDYLATVDVDPK     | 953.9602  | 2 | 74 |         | 0     | 74.0  |
| 232 | IPI00323816.2 | NTGTEAPDYLATVDVDPK     | 953.9602  | 2 | 75 |         | 0     | 75.0  |
| 233 | IPI00323816.2 | PGGASPMGYDFWYQPR       | 915.4095  | 2 | 52 |         | 0     | 52.0  |
| 234 | IPI00323816.2 | PGGASPMGYDFWYQPR       | 915.4128  | 2 | 56 | y4      | 29.45 | 85.5  |
| 235 | IPI00323816.2 | PGGASPMGYDFWYQPR       | 915.4094  | 2 | 71 | y6      | 33.75 | 104.8 |
| 236 | IPI00323816.2 | PGGASPMGYDFWYQPR       | 914.9068  | 2 | 98 | y6      | 46.75 | 144.8 |
| 237 | IPI00323816.2 | QFYPDHIR               | 526.2830  | 2 | 31 | P y5    | 65.15 | 96.2  |
| 238 | IPI00323816.2 | QYDISNPQKPR            | 673.3469  | 2 | 45 | P y5    | 38.2  | 83.2  |
| 239 | IPI00323816.2 | QYDISNPQKPR            | 673.3493  | 2 | 46 | P y5    | 69.75 | 115.8 |
| 240 | IPI00323816.2 | SPQYSQVIHR             | 607.8179  | 2 | 59 |         | 0     | 59.0  |
| 241 | IPI00323816.2 | SPQYSQVIHRLPMPYLK      | 686.3810  | 3 | 20 | y++12   | 5.35  | 25.4  |
| 242 | IPI00323816.2 | SPQYSQVIHRLPMPYLK      | 686.7147  | 3 | 22 |         | 0     | 22.0  |
| 243 | IPI00323816.2 | VIQVPSK                | 385.7424  | 2 | 29 | y4      | 57.05 | 86.1  |

|     |               |                     |           |   |    |       |       |       |
|-----|---------------|---------------------|-----------|---|----|-------|-------|-------|
| 244 | IPI00323816.2 | VIQVPSKK            | 300.1956  | 3 | 15 |       | 0     | 15.0  |
| 245 | IPI00323816.2 | VIQVPSKK            | 449.7900  | 2 | 19 | P y4  | 44.5  | 63.5  |
| 246 | IPI00153317.2 | ADPLGLEAEK          | 521.7748  | 2 | 42 | P y8  | 58.1  | 100.1 |
| 247 | IPI00153317.2 | AGLILFGNDDR         | 596.3225  | 2 | 27 | y6    | 27.2  | 54.2  |
| 248 | IPI00153317.2 | AGLILFGNDDR         | 596.3121  | 2 | 29 | y6    | 41    | 70.0  |
| 249 | IPI00153317.2 | AGLILFGNDDR         | 595.8141  | 2 | 44 | y6    | 38.2  | 82.2  |
| 250 | IPI00153317.2 | ALYVSDK             | 398.2164  | 2 | 22 | y5    | 89    | 111.0 |
| 251 | IPI00153317.2 | ALYVSDK             | 795.4279  | 1 | 22 | c b4  | 16.9  | 38.9  |
| 252 | IPI00153317.2 | ANATEFGLASGVFTR     | 770.8915  | 2 | 18 | y5    | 15.6  | 33.6  |
| 253 | IPI00153317.2 | ANATEFGLASGVFTR     | 514.5978  | 3 | 33 |       | 0     | 33.0  |
| 254 | IPI00153317.2 | ANATEFGLASGVFTR     | 514.2641  | 3 | 50 |       | 0     | 50.0  |
| 255 | IPI00153317.2 | ANATEFGLASGVFTR     | 771.3925  | 2 | 58 | y5    | 29.45 | 87.5  |
| 256 | IPI00153317.2 | ARGQALPEVVAK        | 619.8653  | 2 | 41 | c b8  | 21.2  | 62.2  |
| 257 | IPI00153317.2 | AVQMGMSVFFNK        | 723.8502  | 2 | 46 | y4    | 44.5  | 90.5  |
| 258 | IPI00153317.2 | AVQMGMSVFFNK        | 723.3489  | 2 | 49 |       | 0     | 49.0  |
| 259 | IPI00153317.2 | DGVPVFK             | 381.2133  | 2 | 22 |       | 0     | 22.0  |
| 260 | IPI00153317.2 | DGVPVFK             | 761.4246  | 1 | 25 |       | 0     | 25.0  |
| 261 | IPI00153317.2 | DLGEAALNEYLR        | 682.8504  | 2 | 44 | y5    | 49.1  | 93.1  |
| 262 | IPI00153317.2 | DLGEAALNEYLR        | 682.3543  | 2 | 64 | y7    | 22.4  | 86.4  |
| 263 | IPI00153317.2 | EAFENGLWGK          | 575.7808  | 2 | 22 |       | 0     | 22.0  |
| 264 | IPI00153317.2 | EESFGPIMIISR        | 689.8809  | 2 | 59 | y8    | 58.1  | 117.1 |
| 265 | IPI00153317.2 | EESFGPIMIISR        | 689.8660  | 2 | 60 | y4    | 75.6  | 135.6 |
| 266 | IPI00153317.2 | EGHEVVGVFTIPDK      | 509.5997  | 3 | 22 | y6    | 61.35 | 83.4  |
| 267 | IPI00153317.2 | ETAMINWDQPAEAIHNWIR | 766.0395  | 3 | 26 |       | 0     | 26.0  |
| 268 | IPI00153317.2 | ETAMINWDQPAEAIHNWIR | 1148.5544 | 2 | 50 | y7    | 5.55  | 55.6  |
| 269 | IPI00153317.2 | FADGDVDAVLSR        | 632.8124  | 2 | 68 |       | 0     | 68.0  |
| 270 | IPI00153317.2 | FAELTLK             | 411.2424  | 2 | 33 | y6    | 69.75 | 102.8 |
| 271 | IPI00153317.2 | FLFPEGIK            | 475.7714  | 2 | 21 | y6    | 61.35 | 82.4  |
| 272 | IPI00153317.2 | GASAINWTLIHGDK      | 741.9001  | 2 | 66 | y7    | 82.65 | 148.7 |
| 273 | IPI00153317.2 | GMVQAVR             | 380.7104  | 2 | 29 | y5    | 49.6  | 78.6  |
| 274 | IPI00153317.2 | GQALPEVVAK          | 506.2953  | 2 | 24 | P y6  | 95.65 | 119.7 |
| 275 | IPI00153317.2 | GVVNILPGSGSLVGQR    | 776.9620  | 2 | 27 | P y10 | 50.5  | 77.5  |
| 276 | IPI00153317.2 | GVVNILPGSGSLVGQR    | 518.2982  | 3 | 45 | y4    | 49.1  | 94.1  |
| 277 | IPI00153317.2 | HGSIYHPSLLPR        | 497.2806  | 3 | 30 | P y6  | 57.05 | 87.1  |
| 278 | IPI00153317.2 | HGSIYHPSLLPR        | 497.2807  | 3 | 31 | P y6  | 69.75 | 100.8 |
| 279 | IPI00153317.2 | HGSIYHPSLLPR        | 745.4277  | 2 | 52 | y8    | 73.4  | 125.4 |
| 280 | IPI00153317.2 | HRGASAINWTLIHGDK    | 888.9696  | 2 | 22 | y4    | 29.45 | 51.5  |
| 281 | IPI00153317.2 | HRGASAINWTLIHGDK    | 444.7379  | 4 | 32 |       | 0     | 32.0  |
| 282 | IPI00153317.2 | HRGASAINWTLIHGDK    | 444.9892  | 4 | 34 | y5    | 44.5  | 78.5  |
| 283 | IPI00153317.2 | HRGASAINWTLIHGDK    | 592.6500  | 3 | 44 | y7    | 61.35 | 105.4 |
| 284 | IPI00153317.2 | IGFTGSTEVGK         | 548.2889  | 2 | 51 | y7    | 46.75 | 97.8  |

|     |               |                                  |           |   |    |        |       |       |
|-----|---------------|----------------------------------|-----------|---|----|--------|-------|-------|
| 285 | IPI00153317.2 | IGNPLDRDTNHGPNHEAHLR             | 798.0743  | 3 | 38 |        | 0     | 38.0  |
| 286 | IPI00153317.2 | IGNPLDRDTNHGPNHEAHLR             | 840.7614  | 3 | 20 | c b8   | 22.4  | 42.4  |
| 287 | IPI00153317.2 | IGNPLDRDTNHGPNHEAHLR             | 840.7750  | 3 | 27 | y++11  | 12.15 | 39.2  |
| 288 | IPI00153317.2 | ILPNVPEVEDSTDFFK                 | 925.4638  | 2 | 35 | c b5 P | 44.5  | 79.5  |
| 289 | IPI00153317.2 | ILPNVPEVEDSTDFFK                 | 925.9704  | 2 | 52 | c b5 P | 15.6  | 67.6  |
| 290 | IPI00153317.2 | ILPNVPEVEDSTDFFK                 | 925.5202  | 2 | 64 |        | 0     | 64.0  |
| 291 | IPI00153317.2 | IQGATIPINQARPNR                  | 550.3131  | 3 | 17 |        | 0     | 17.0  |
| 292 | IPI00153317.2 | IQGATIPINQARPNR                  | 550.6472  | 3 | 24 | P y++9 | 27.2  | 51.2  |
| 293 | IPI00153317.2 | KETAMINWDQPAEAIHNWIR             | 606.5623  | 4 | 44 |        | 0     | 44.0  |
| 294 | IPI00153317.2 | KETAMINWDQPAEAIHNWIR             | 606.8121  | 4 | 49 |        | 0     | 49.0  |
| 295 | IPI00153317.2 | KETAMINWDQPAEAIHNWIR             | 808.7374  | 3 | 56 | y++12  | 11    | 67.0  |
| 296 | IPI00153317.2 | KETAMINWDQPAEAIHNWIR             | 808.7374  | 3 | 72 | y4     | 32.3  | 104.3 |
| 297 | IPI00153317.2 | KGGFTIFWADDGLDTGDLQK             | 804.4147  | 3 | 20 | y4     | 49.1  | 69.1  |
| 298 | IPI00153317.2 | KGGFTIFWADDGLDTGDLQK             | 804.4145  | 3 | 28 | y4     | 44.5  | 72.5  |
| 299 | IPI00153317.2 | KLTLQMPYQLFIGGEFVDAEGAK          | 852.7773  | 3 | 26 | y6     | 38.2  | 64.2  |
| 300 | IPI00153317.2 | KLTLQMPYQLFIGGEFVDAEGAK          | 852.7775  | 3 | 31 | y7     | 38.2  | 69.2  |
| 301 | IPI00153317.2 | KLTLQMPYQLFIGGEFVDAEGAK          | 852.7776  | 3 | 32 |        | 0     | 32.0  |
| 302 | IPI00153317.2 | KLTLQMPYQLFIGGEFVDAEGAK          | 852.7804  | 3 | 33 | y8     | 33.75 | 66.8  |
| 303 | IPI00153317.2 | KLTLQMPYQLFIGGEFVDAEGAK          | 852.7776  | 3 | 37 | y6     | 49.6  | 86.6  |
| 304 | IPI00153317.2 | KVSLELGGK                        | 465.7843  | 2 | 34 | y7     | 49.6  | 83.6  |
| 305 | IPI00153317.2 | LADLMEQHQEELATIEALDAGAVYTLALK    | 1053.2137 | 3 | 18 | y9     | 21.2  | 39.2  |
| 306 | IPI00153317.2 | LADLMEQHQEELATIEALDAGAVYTLALK    | 1052.8670 | 3 | 19 |        | 0     | 19.0  |
| 307 | IPI00153317.2 | LADLMEQHQEELATIEALDAGAVYTLALK    | 1053.5453 | 3 | 21 | y9     | 20.1  | 41.1  |
| 308 | IPI00153317.2 | LADLMEQHQEELATIEALDAGAVYTLALK    | 1053.2030 | 3 | 23 | y6     | 25.35 | 48.4  |
| 309 | IPI00153317.2 | LADLMEQHQEELATIEALDAGAVYTLALK    | 1053.2096 | 3 | 39 | y9     | 30.4  | 69.4  |
| 310 | IPI00153317.2 | LADLMEQHQEELATIEALDAGAVYTLALK    | 1053.2142 | 3 | 41 |        | 0     | 41.0  |
| 311 | IPI00153317.2 | LADLMEQHQEELATIEALDAGAVYTLALK    | 1053.2143 | 3 | 42 | y9     | 12.85 | 54.9  |
| 312 | IPI00153317.2 | LADLMEQHQEELATIEALDAGAVYTLALK    | 1053.2141 | 3 | 44 | y5     | 16.9  | 60.9  |
| 313 | IPI00153317.2 | LFVEDSIHQFVQK                    | 568.9578  | 3 | 16 |        | 0     | 16.0  |
| 314 | IPI00153317.2 | LIAEGTAPR                        | 464.2668  | 2 | 46 | y5     | 25.35 | 71.4  |
| 315 | IPI00153317.2 | LQAGTVFVNTYNK                    | 727.8902  | 2 | 64 | y7     | 38.2  | 102.2 |
| 316 | IPI00153317.2 | LSDHPDVR                         | 313.4945  | 3 | 15 |        | 0     | 15.0  |
| 317 | IPI00153317.2 | LSDHPDVR                         | 469.7382  | 2 | 26 | c b6   | 25.35 | 51.4  |
| 318 | IPI00153317.2 | LSDHPDVRK                        | 533.7855  | 2 | 23 | c b6   | 38.2  | 61.2  |
| 319 | IPI00153317.2 | LSDHPDVRK                        | 356.1928  | 3 | 35 | c b6   | 27.2  | 62.2  |
| 320 | IPI00153317.2 | LTFNNTLNTSGLVAQGEALPIPGAHRPGLVTK | 852.7187  | 4 | 18 | y++18  | 27    | 45.0  |
| 321 | IPI00153317.2 | LTFNNTLNTSGLVAQGEALPIPGAHRPGLVTK | 852.9673  | 4 | 19 |        | 0     | 19.0  |
| 322 | IPI00153317.2 | LTFNNTLNTSGLVAQGEALPIPGAHRPGLVTK | 852.7162  | 4 | 20 |        | 0     | 20.0  |
| 323 | IPI00153317.2 | LTFNNTLNTSGLVAQGEALPIPGAHRPGLVTK | 852.7190  | 4 | 25 |        | 0     | 25.0  |
| 324 | IPI00153317.2 | LTFNNTLNTSGLVAQGEALPIPGAHRPGLVTK | 852.9929  | 4 | 27 |        | 0     | 27.0  |
| 325 | IPI00153317.2 | LVEEVK                           | 716.4193  | 1 | 27 | y4     | 41    | 68.0  |



|     |               |                             |           |   |    |        |       |       |
|-----|---------------|-----------------------------|-----------|---|----|--------|-------|-------|
| 326 | IPI00153317.2 | NIQLEDGK                    | 458.7405  | 2 | 22 | y5     | 52.95 | 75.0  |
| 327 | IPI00153317.2 | NIQLEDGK                    | 916.4962  | 1 | 46 |        | 0     | 46.0  |
| 328 | IPI00153317.2 | NLTCLK                      | 345.2131  | 2 | 20 |        | 0     | 20.0  |
| 329 | IPI00153317.2 | NLTCLK                      | 689.4196  | 1 | 28 |        | 0     | 28.0  |
| 330 | IPI00153317.2 | PAQVPLTALK                  | 569.8454  | 2 | 32 | y8     | 44.3  | 76.3  |
| 331 | IPI00153317.2 | PGFFFQPTVFTDVEDHMYIAK       | 830.7338  | 3 | 29 | c b6 P | 27.2  | 56.2  |
| 332 | IPI00153317.2 | PGFFFQPTVFTDVEDHMYIAK       | 830.7336  | 3 | 39 | b4     | 9.55  | 48.6  |
| 333 | IPI00153317.2 | RPQPEEGATYEGIQK             | 568.2854  | 3 | 38 | y6     | 46.75 | 84.8  |
| 334 | IPI00153317.2 | RPQPEEGATYEGIQK             | 915.9876  | 2 | 51 | c b6   | 14.55 | 65.6  |
| 335 | IPI00153317.2 | RPQPEEGATYEGIQK             | 610.9833  | 3 | 58 | c b8   | 31.95 | 90.0  |
| 336 | IPI00153317.2 | TDVAAPFGGFK                 | 555.2854  | 2 | 25 | P y6   | 61.35 | 86.4  |
| 337 | IPI00153317.2 | THVGMSIQTFR                 | 638.8274  | 2 | 30 | y8     | 21.2  | 51.2  |
| 338 | IPI00153317.2 | VVEEVGK                     | 380.2165  | 2 | 18 |        | 0     | 18.0  |
| 339 | IPI00314298.3 | GTWEKPGDAAPMGYDFWYQPR       | 825.0409  | 3 | 28 | y5     | 38.2  | 66.2  |
| 340 | IPI00314298.3 | HEIIQTLQMTDGLIPLEIR         | 1111.1098 | 2 | 81 | y8     | 44.3  | 125.3 |
| 341 | IPI00314298.3 | LAGQIFLGGIVRGGSVQV          | 620.4036  | 3 | 18 | y7     | 1.75  | 19.8  |
| 342 | IPI00314298.3 | LILPGLISSR                  | 534.8424  | 2 | 33 | P y7   | 35.8  | 68.8  |
| 343 | IPI00314298.3 | NAEGTWSVEK                  | 560.7663  | 2 | 38 |        | 0     | 38.0  |
| 344 | IPI00314298.3 | PGDAAPMGYDFWYQPR            | 936.4154  | 2 | 46 | y6     | 33.75 | 79.8  |
| 345 | IPI00314298.3 | PGDAAPMGYDFWYQPR            | 936.4156  | 2 | 55 | y6     | 46.75 | 101.8 |
| 346 | IPI00110042.1 | DGFNPAHVEAGLYGSR            | 563.9383  | 3 | 43 | y4     | 41    | 84.0  |
| 347 | IPI00110042.1 | IYVVDVGSEPR                 | 617.3288  | 2 | 68 | y5     | 44.5  | 112.5 |
| 348 | IPI00110042.1 | LILPGLISSR                  | 534.8424  | 2 | 30 | P y7   | 57.05 | 87.1  |
| 349 | IPI00110042.1 | RIPGGPQMIQLSLDGG            | 570.6546  | 3 | 32 | y7     | 14.55 | 46.6  |
| 350 | IPI00110042.1 | VIEASEIQAK                  | 544.3041  | 2 | 66 | y8     | 73.4  | 139.4 |
| 351 | IPI00110042.1 | VIEASEIQAK                  | 544.3040  | 2 | 66 | y8     | 58.1  | 124.1 |
| 352 | IPI00133456.1 | DGLNAEGLLR                  | 529.2856  | 2 | 55 | y4     | 16.9  | 71.9  |
| 353 | IPI00133456.1 | DGLNAEGLLRQPDAGNIFK         | 676.6978  | 3 | 29 | P y8   | 21.2  | 50.2  |
| 354 | IPI00133456.1 | DGLNAEGLLRQPDAGNIFK         | 676.6978  | 3 | 29 | b5     | 7.1   | 36.1  |
| 355 | IPI00133456.1 | DGLNAEGLLRQPDAGNIFK         | 1015.0300 | 2 | 36 |        | 0     | 36.0  |
| 356 | IPI00133456.1 | DGLNAEGLLRQPDAGNIFK         | 677.0277  | 3 | 41 | P y8   | 55.3  | 96.3  |
| 357 | IPI00133456.1 | DHSVKK                      | 357.1722  | 2 | 23 | y4     | 15.6  | 38.6  |
| 358 | IPI00133456.1 | FNDGKVDPAGR                 | 588.2916  | 2 | 41 | P y4   | 62.3  | 103.3 |
| 359 | IPI00133456.1 | FNDGKVDPAGR                 | 392.5318  | 3 | 46 |        | 0     | 46.0  |
| 360 | IPI00133456.1 | GIAPYSYAG                   | 898.4715  | 1 | 19 | P y6   | 65.15 | 84.2  |
| 361 | IPI00133456.1 | HQGSLSLFPDHSVK              | 572.2897  | 3 | 27 | P y6   | 25.35 | 52.4  |
| 362 | IPI00133456.1 | HQGSLSLFPDHSVK              | 572.2897  | 3 | 31 | P y6   | 57.05 | 88.1  |
| 363 | IPI00133456.1 | HQGSLSLFPDHSVK              | 857.9312  | 2 | 72 | y4     | 18.5  | 90.5  |
| 364 | IPI00133456.1 | HQGSLSLFPDHSVKK             | 461.4930  | 4 | 19 | b5     | 16.9  | 35.9  |
| 365 | IPI00133456.1 | HQGSLSLFPDHSVKK             | 614.9879  | 3 | 26 | P y7   | 52.95 | 79.0  |
| 366 | IPI00133456.1 | IFYIDSLSYTVDAFDYDLQTGGISNRR | 1122.5356 | 3 | 26 |        | 0     | 26.0  |

|     |               |                               |           |   |    |        |       |       |
|-----|---------------|-------------------------------|-----------|---|----|--------|-------|-------|
| 367 | IPI00133456.1 | IFYYIDSLSYTVDAFDYDLQTGGQISNRR | 1122.5429 | 3 | 33 | y++10  | 0.9   | 33.9  |
| 368 | IPI00133456.1 | IFYYIDSLSYTVDAFDYDLQTGGQISNRR | 1122.2140 | 3 | 40 |        | 0     | 40.0  |
| 369 | IPI00133456.1 | IFYYIDSLSYTVDAFDYDLQTGGQISNRR | 1122.5439 | 3 | 44 | y++13  | 4.7   | 48.7  |
| 370 | IPI00133456.1 | IFYYIDSLSYTVDAFDYDLQTGGQISNRR | 1122.5493 | 3 | 46 |        | 0     | 46.0  |
| 371 | IPI00133456.1 | IFYYIDSLSYTVDAFDYDLQTGGQISNRR | 1122.5443 | 3 | 49 | y++14  | 11    | 60.0  |
| 372 | IPI00133456.1 | IFYYIDSLSYTVDAFDYDLQTGGQISNRR | 1122.2162 | 3 | 54 |        | 0     | 54.0  |
| 373 | IPI00133456.1 | IFYYIDSLSYTVDAFDYDLQTGGQISNRR | 1122.4824 | 3 | 57 | y++10  | 1.6   | 58.6  |
| 374 | IPI00133456.1 | IFYYIDSLSYTVDAFDYDLQTGGQISNRR | 1122.2197 | 3 | 63 | y++12  | 11.55 | 74.6  |
| 375 | IPI00133456.1 | IFYYIDSLSYTVDAFDYDLQTGGQISNRR | 1122.2150 | 3 | 63 | y++17  | 40.45 | 103.5 |
| 376 | IPI00133456.1 | IFYYIDSLSYTVDAFDYDLQTGGQISNRR | 1122.2146 | 3 | 64 |        | 0     | 64.0  |
| 377 | IPI00133456.1 | IFYYIDSLSYTVDAFDYDLQTGGQISNRR | 1122.2085 | 3 | 65 | b5     | 16.9  | 81.9  |
| 378 | IPI00133456.1 | IFYYIDSLSYTVDAFDYDLQTGGQISNRR | 1122.2098 | 3 | 71 |        | 0     | 71.0  |
| 379 | IPI00133456.1 | ITGLGVK                       | 687.4411  | 1 | 29 |        | 0     | 29.0  |
| 380 | IPI00133456.1 | KYFDQVDISNGLDWSLDHK           | 761.3650  | 3 | 40 | y++9   | 35.8  | 75.8  |
| 381 | IPI00133456.1 | KYFDQVDISNGLDWSLDHK           | 761.0357  | 3 | 48 | c b7   | 12.85 | 60.9  |
| 382 | IPI00133456.1 | KYFDQVDISNGLDWSLDHK           | 761.0703  | 3 | 49 | y6     | 14.55 | 63.6  |
| 383 | IPI00133456.1 | KYFDQVDISNGLDWSLDHK           | 761.0358  | 3 | 51 | y7     | 11.55 | 62.6  |
| 384 | IPI00133456.1 | LPVDK                         | 571.3446  | 1 | 28 | b4     | 29.45 | 57.5  |
| 385 | IPI00133456.1 | NNRFNDGKVDPAGR                | 520.5946  | 3 | 17 | P y4   | 32.3  | 49.3  |
| 386 | IPI00133456.1 | NNRFNDGKVDPAGR                | 780.3922  | 2 | 23 | P y4   | 44.5  | 67.5  |
| 387 | IPI00133456.1 | QLGGYVATIGTK                  | 604.3376  | 2 | 30 |        | 0     | 30.0  |
| 388 | IPI00133456.1 | RLQTVKLPVDK                   | 432.9384  | 3 | 34 | c b5   | 7.7   | 41.7  |
| 389 | IPI00133456.1 | VAVDAPVSSVALR                 | 642.3700  | 2 | 55 | P y8   | 20.1  | 75.1  |
| 390 | IPI00133456.1 | VAVDAPVSSVALR                 | 642.3745  | 2 | 65 | P y8   | 44.3  | 109.3 |
| 391 | IPI00133456.1 | VIRLDPETGK                    | 376.5521  | 3 | 32 |        | 0     | 32.0  |
| 392 | IPI00133456.1 | VIRLDPETGK                    | 564.3243  | 2 | 44 | c b5 P | 38.2  | 82.2  |
| 393 | IPI00133456.1 | WDTVSNQVQR                    | 616.8053  | 2 | 60 | y6     | 52.95 | 113.0 |
| 394 | IPI00221890.4 | DIKHDPQLPWSASYDPGSAK          | 767.3720  | 3 | 19 | b5 P   | 57.05 | 76.1  |
| 395 | IPI00221890.4 | DIKHDPQLPWSASYDPGSAK          | 767.3720  | 3 | 30 | P y5   | 44.5  | 74.5  |
| 396 | IPI00221890.4 | DIKHDPQLPWSASYDPGSAK          | 767.3694  | 3 | 48 | P y5   | 41    | 89.0  |
| 397 | IPI00221890.4 | EPMTVSSDQMAK                  | 662.3013  | 2 | 27 | y7     | 49.6  | 76.6  |
| 398 | IPI00221890.4 | EPMTVSSDQMAK                  | 662.2994  | 2 | 35 | y7     | 65.15 | 100.2 |
| 399 | IPI00221890.4 | EWGYASHNGPDHWHELYPIAK         | 836.7194  | 3 | 16 |        | 0     | 16.0  |
| 400 | IPI00221890.4 | EWGYASHNGPDHWHELYPIAK         | 836.7224  | 3 | 26 | P y4   | 41    | 67.0  |
| 401 | IPI00221890.4 | GDNQSPIELHTK                  | 669.8377  | 2 | 27 | P y7   | 61.35 | 88.4  |
| 402 | IPI00221890.4 | GEFQILLDALDK                  | 681.3940  | 2 | 59 | y5     | 83.9  | 142.9 |
| 403 | IPI00221890.4 | GEFQILLDALDK                  | 681.3689  | 2 | 84 | c b5   | 27.2  | 111.2 |
| 404 | IPI00221890.4 | GEFQILLDALDK                  | 681.3966  | 2 | 84 | y5     | 83.9  | 167.9 |
| 405 | IPI00221890.4 | GGPLSGPYR                     | 903.4931  | 1 | 29 |        | 0     | 29.0  |
| 406 | IPI00221890.4 | GGPLSGPYR                     | 452.2376  | 2 | 39 | y4     | 49.1  | 88.1  |
| 407 | IPI00221890.4 | HDPSLQPWSASYDPGSAK            | 972.4520  | 2 | 31 |        | 0     | 31.0  |

|     |               |                                 |           |   |    |        |       |       |
|-----|---------------|---------------------------------|-----------|---|----|--------|-------|-------|
| 408 | IPI00221890.4 | HDPSLQPWSASYDPGSAK              | 648.6378  | 3 | 40 | c b6 P | 22.4  | 62.4  |
| 409 | IPI00221890.4 | HDPSLQPWSASYDPGSAK              | 648.3068  | 3 | 46 | c b6 P | 27.2  | 73.2  |
| 410 | IPI00221890.4 | HDPSLQPWSASYDPGSAK              | 972.4517  | 2 | 46 |        | 0     | 46.0  |
| 411 | IPI00221890.4 | HDPSLQPWSASYDPGSAK              | 971.9525  | 2 | 50 | c b6 P | 27.2  | 77.2  |
| 412 | IPI00221890.4 | HDPSLQPWSASYDPGSAK              | 971.9486  | 2 | 52 | c b6 P | 29.45 | 81.5  |
| 413 | IPI00221890.4 | HDPSLQPWSASYDPGSAK              | 648.3021  | 3 | 58 | P y5   | 29.45 | 87.5  |
| 414 | IPI00221890.4 | LRQFHLHWGSSDDHGSEHTVDGVK        | 687.0864  | 4 | 15 | y++17  | 8.65  | 23.7  |
| 415 | IPI00221890.4 | LRQFHLHWGSSDDHGSEHTVDGVK        | 686.8348  | 4 | 17 |        | 0     | 17.0  |
| 416 | IPI00221890.4 | QFHLHWGSSDDHGSEHTVDGVK          | 826.0647  | 3 | 19 | y++16  | 15.5  | 34.5  |
| 417 | IPI00221890.4 | QPDGIAVVGIFLK                   | 679.4053  | 2 | 16 | y8     | 69.75 | 85.8  |
| 418 | IPI00221890.4 | QPDGIAVVGIFLK                   | 678.8973  | 2 | 17 | y8     | 58.1  | 75.1  |
| 419 | IPI00221890.4 | QPDGIAVVGIFLK                   | 678.9221  | 2 | 18 | y8     | 44.3  | 62.3  |
| 420 | IPI00221890.4 | QPDGIAVVGIFLK                   | 678.8974  | 2 | 20 | y8     | 69.75 | 89.8  |
| 421 | IPI00221890.4 | QPDGIAVVGIFLK                   | 678.8973  | 2 | 24 | y8     | 69.75 | 93.8  |
| 422 | IPI00221890.4 | QPDGIAVVGIFLK                   | 679.0226  | 2 | 28 | y8     | 55.3  | 83.3  |
| 423 | IPI00221890.4 | SLFSSAENEPVPLVGNWRPPQPVK        | 916.1506  | 3 | 48 |        | 0     | 48.0  |
| 424 | IPI00221890.4 | SLFSSAENEPVPLVGNWRPPQPVK        | 916.1504  | 3 | 54 | y++17  | 9.65  | 63.7  |
| 425 | IPI00221890.4 | SLFSSAENEPVPLVGNWRPPQPVK        | 916.1544  | 3 | 55 | c b9 P | 66.55 | 121.6 |
| 426 | IPI00221890.4 | SLFSSAENEPVPLVGNWRPPQPVK        | 916.1808  | 3 | 55 | c b9 P | 42.15 | 97.2  |
| 427 | IPI00221890.4 | SLFSSAENEPVPLVGNWRPPQPVK        | 916.1506  | 3 | 56 | b9 P   | 40.2  | 96.2  |
| 428 | IPI00221890.4 | TILNNGK                         | 380.7138  | 2 | 17 |        | 0     | 17.0  |
| 429 | IPI00221890.4 | VVFDDTYDR                       | 565.2616  | 2 | 43 | y7     | 33.75 | 76.8  |
| 430 | IPI00221890.4 | VVFDDTYDR                       | 565.2616  | 2 | 47 | y7     | 33.75 | 80.8  |
| 431 | IPI00221890.4 | YAAELHLVHWNPK                   | 395.2113  | 4 | 16 | y++9   | 25.35 | 41.4  |
| 432 | IPI00221890.4 | YAAELHLVHWNPK                   | 395.2112  | 4 | 25 | y++9   | 89    | 114.0 |
| 433 | IPI00221890.4 | YAAELHLVHWNPK                   | 526.6124  | 3 | 25 |        | 0     | 25.0  |
| 434 | IPI00221890.4 | YAAELHLVHWNPK                   | 526.6124  | 3 | 27 | y5     | 75.6  | 102.6 |
| 435 | IPI00221890.4 | YAAELHLVHWNPK                   | 526.6124  | 3 | 29 | y++8   | 29.45 | 58.5  |
| 436 | IPI00221890.4 | YAAELHLVHWNPK                   | 789.4360  | 2 | 64 | c b8   | 12.15 | 76.2  |
| 437 | IPI00221890.4 | YNTFGEALK                       | 1042.5196 | 1 | 19 | y8     | 1.95  | 21.0  |
| 438 | IPI00221890.4 | YNTFGEALKQPDGIAVVGIFLK          | 794.4342  | 3 | 17 | y8     | 31.95 | 49.0  |
| 439 | IPI00221890.4 | YNTFGEALKQPDGIAVVGIFLK          | 794.4367  | 3 | 25 | y7     | 33.75 | 58.8  |
| 440 | IPI00221890.4 | YNTFGEALKQPDGIAVVGIFLK          | 794.4441  | 3 | 25 | y8     | 1.75  | 26.8  |
| 441 | IPI00221890.4 | YNTFGEALKQPDGIAVVGIFLK          | 794.4338  | 3 | 27 | y8     | 21.2  | 48.2  |
| 442 | IPI00221890.4 | YNTFGEALKQPDGIAVVGIFLK          | 794.4334  | 3 | 29 | y5     | 49.1  | 78.1  |
| 443 | IPI00221890.4 | YNTFGEALKQPDGIAVVGIFLK          | 794.4343  | 3 | 32 | y8     | 42.15 | 74.2  |
| 444 | IPI00221890.4 | YNTFGEALKQPDGIAVVGIFLK          | 794.4367  | 3 | 34 | y5     | 18.5  | 52.5  |
| 445 | IPI00380501.2 | EAGFPPGVVNIYPGYGPTAGAAISSHMDVDK | 1018.8392 | 3 | 17 |        | 0     | 17.0  |
| 446 | IPI00380501.2 | EEIFGPVQQIMK                    | 709.8717  | 2 | 39 | c b8   | 5.35  | 44.4  |
| 447 | IPI00380501.2 | EEIFGPVQQIMK                    | 709.8844  | 2 | 39 | c b8   | 12.15 | 51.2  |
| 448 | IPI00380501.2 | EEIFGPVQQIMK                    | 709.8716  | 2 | 43 | c b8   | 1.95  | 45.0  |

|     |               |                           |           |   |    |         |       |       |
|-----|---------------|---------------------------|-----------|---|----|---------|-------|-------|
| 449 | IPI00380501.2 | EEIFGPVQQIMK              | 709.8905  | 2 | 45 | c b8    | 5.35  | 50.4  |
| 450 | IPI00380501.2 | EEIFGPVQQIMK              | 709.8716  | 2 | 49 | c b8    | 5.35  | 54.4  |
| 451 | IPI00380501.2 | ELGEHGLYEYTELK            | 840.9085  | 2 | 41 |         | 0     | 41.0  |
| 452 | IPI00380501.2 | GFFVQPTVFSNVTDENR         | 659.3224  | 3 | 28 | y5      | 41    | 69.0  |
| 453 | IPI00380501.2 | GFFVQPTVFSNVTDENR         | 987.4732  | 2 | 51 | b4      | 23.35 | 74.4  |
| 454 | IPI00380501.2 | GFFVQPTVFSNVTDENR         | 987.9757  | 2 | 57 | c b4    | 9.55  | 66.6  |
| 455 | IPI00380501.2 | GFFVQPTVFSNVTDENR         | 987.4734  | 2 | 57 | b4      | 9.55  | 66.6  |
| 456 | IPI00380501.2 | GFFVQPTVFSNVTDENR         | 987.9757  | 2 | 58 |         | 0     | 58.0  |
| 457 | IPI00380501.2 | GFFVQPTVFSNVTDENR         | 987.9754  | 2 | 59 | y8      | 33.75 | 92.8  |
| 458 | IPI00380501.2 | GFFVQPTVFSNVTDENR         | 987.9761  | 2 | 66 | c b5 P  | 62.3  | 128.3 |
| 459 | IPI00380501.2 | GFFVQPTVFSNVTDENR         | 987.9756  | 2 | 76 | y8      | 30.4  | 106.4 |
| 460 | IPI00380501.2 | IFINNEWHNSVSGK            | 548.9423  | 3 | 19 | y++13   | 81.65 | 100.7 |
| 461 | IPI00380501.2 | IFINNEWHNSVSGK            | 822.9264  | 2 | 72 | y8      | 85.6  | 157.6 |
| 462 | IPI00380501.2 | IFVEESVYDEFVK             | 802.3995  | 2 | 35 | y8      | 31.95 | 67.0  |
| 463 | IPI00380501.2 | IFVEESVYDEFVK             | 802.3996  | 2 | 62 |         | 0     | 62.0  |
| 464 | IPI00380501.2 | IHGQTIPSDGDIFTYTR         | 640.9880  | 3 | 50 | y4      | 27.2  | 77.2  |
| 465 | IPI00380501.2 | IHGQTIPSDGDIFTYTR         | 641.3199  | 3 | 53 | y5      | 25.35 | 78.4  |
| 466 | IPI00380501.2 | IHGQTIPSDGDIFTYTRR        | 693.0256  | 3 | 15 | y++9    | 7.1   | 22.1  |
| 467 | IPI00380501.2 | KYVLGNPLTPGINQGPQIDKEQHDK | 930.8273  | 3 | 44 | y6      | 35.8  | 79.8  |
| 468 | IPI00380501.2 | LADLMER                   | 424.2207  | 2 | 43 | y5      | 38.2  | 81.2  |
| 469 | IPI00380501.2 | LLLATMEALNGGK             | 666.3660  | 2 | 42 | b9      | 12.15 | 54.2  |
| 470 | IPI00380501.2 | PAEQTPLTALHLASLIK         | 601.7004  | 3 | 35 | P y++12 | 22.4  | 57.4  |
| 471 | IPI00380501.2 | PAEQTPLTALHLASLIK         | 602.0340  | 3 | 45 | y++13   | 20.1  | 65.1  |
| 472 | IPI00380501.2 | QAFQIGSPWR                | 595.3095  | 2 | 45 |         | 0     | 45.0  |
| 473 | IPI00380501.2 | RANNTTYGLAAGLFTK          | 566.6373  | 3 | 16 | y6      | 38.2  | 54.2  |
| 474 | IPI00380501.2 | RVTLELGGK                 | 324.8659  | 3 | 37 | c b4    | 6.6   | 43.6  |
| 475 | IPI00380501.2 | RVTLELGGK                 | 486.7958  | 2 | 55 | c b5    | 25.35 | 80.4  |
| 476 | IPI00380501.2 | SVDDVIK                   | 388.2137  | 2 | 29 | y5      | 69.75 | 98.8  |
| 477 | IPI00380501.2 | VAFTGSTQVGK               | 547.7962  | 2 | 49 | y7      | 22.4  | 71.4  |
| 478 | IPI00380501.2 | YVLGNPLTPGINQGPQIDK       | 1013.0473 | 2 | 38 |         | 0     | 38.0  |
| 479 | IPI00380501.2 | YVLGNPLTPGINQGPQIDK       | 1013.0478 | 2 | 51 |         | 0     | 51.0  |
| 480 | IPI00285029.1 | AGLYGLPK                  | 409.7420  | 2 | 27 |         | 0     | 27.0  |
| 481 | IPI00285029.1 | ALIAEATK                  | 408.7453  | 2 | 27 | y6      | 82.65 | 109.7 |
| 482 | IPI00285029.1 | DGAWGAFR                  | 440.2091  | 2 | 36 | y4      | 18.5  | 54.5  |
| 483 | IPI00285029.1 | DNLEFFLTNLGK              | 705.8677  | 2 | 72 | y5      | 52.95 | 125.0 |
| 484 | IPI00285029.1 | EDTQVADVTTSR              | 661.3150  | 2 | 64 | y7      | 46.75 | 110.8 |
| 485 | IPI00285029.1 | EGGFLLVHTVLK              | 656.9035  | 2 | 33 | y7      | 33.75 | 66.8  |
| 486 | IPI00285029.1 | FDASFFGVHPK               | 417.8766  | 3 | 38 | y++10   | 61.35 | 99.4  |
| 487 | IPI00285029.1 | FDASFFGVHPK               | 626.3165  | 2 | 48 | y6      | 25.35 | 73.4  |
| 488 | IPI00285029.1 | FLEIGKFDLSNNHPLGMAIFLK    | 836.1197  | 3 | 26 | P y9    | 55.3  | 81.3  |
| 489 | IPI00285029.1 | FLEIGKFDLSNNHPLGMAIFLK    | 835.7855  | 3 | 37 |         | 0     | 37.0  |

|     |               |                                        |           |   |    |       |       |       |
|-----|---------------|----------------------------------------|-----------|---|----|-------|-------|-------|
| 490 | IPI00285029.1 | FPQLDDTSFANSR                          | 749.3739  | 2 | 67 | y7    | 13.65 | 80.7  |
| 491 | IPI00285029.1 | GGNVGINSFGGSSNVHVLQPNTR                | 848.4374  | 3 | 20 |       | 0     | 20.0  |
| 492 | IPI00285029.1 | GNAGQTNYGFANSTMER                      | 909.3966  | 2 | 81 | y7    | 13.65 | 94.7  |
| 493 | IPI00285029.1 | GYTVLGV EGR                            | 525.7834  | 2 | 51 | y6    | 14.55 | 65.6  |
| 494 | IPI00285029.1 | HFQLEQDKPK                             | 423.8914  | 3 | 32 | y5    | 15.6  | 47.6  |
| 495 | IPI00285029.1 | HFQLEQDKPK                             | 635.3333  | 2 | 44 | c b7  | 46.75 | 90.8  |
| 496 | IPI00285029.1 | IPALLNTQPMLQLEYTATDRHPQALK             | 741.6504  | 4 | 24 | b8 P  | 13.65 | 37.7  |
| 497 | IPI00285029.1 | IPALLNTQPMLQLEYTATDRHPQALK             | 741.6528  | 4 | 27 |       | 0     | 27.0  |
| 498 | IPI00285029.1 | IPALLNTQPMLQLEYTATDRHPQALK             | 988.5324  | 3 | 28 |       | 0     | 28.0  |
| 499 | IPI00285029.1 | LDPGSPELQQVLK                          | 712.4179  | 2 | 25 | P y8  | 73.4  | 98.4  |
| 500 | IPI00285029.1 | LLLPEPLISGLLSQALK                      | 1018.0975 | 2 | 23 | y6    | 6.6   | 29.6  |
| 501 | IPI00285029.1 | LLLPEPLISGLLSQALK                      | 679.0674  | 3 | 43 | y6    | 62.3  | 105.3 |
| 502 | IPI00285029.1 | LLLPEPLISGLLSQALK                      | 1018.0972 | 2 | 45 | y6    | 29.45 | 74.5  |
| 503 | IPI00285029.1 | LPESENLQEFWANLIGGVDMVTDDRR             | 1041.1648 | 3 | 69 | y++16 | 15.5  | 84.5  |
| 504 | IPI00285029.1 | LPESENLQEFWANLIGGVDMVTDDRR             | 1040.8347 | 3 | 70 |       | 0     | 70.0  |
| 505 | IPI00285029.1 | LQTATSR                                | 439.2404  | 2 | 20 | y6    | 23.75 | 43.8  |
| 506 | IPI00285029.1 | QAHTMDPQLR                             | 399.5332  | 3 | 22 |       | 0     | 22.0  |
| 507 | IPI00285029.1 | QHSQDLAFVSMNDIAATPTAAMPFR              | 945.4686  | 3 | 26 |       | 0     | 26.0  |
| 508 | IPI00285029.1 | QHSQDLAFVSMNDIAATPTAAMPFR              | 945.4686  | 3 | 36 | P y8  | 30.4  | 66.4  |
| 509 | IPI00285029.1 | RVYATILNAGTNTDGSK                      | 890.9642  | 2 | 78 | c b7  | 18.5  | 96.5  |
| 510 | IPI00285029.1 | SDEAVKPLGVK                            | 571.8251  | 2 | 47 | P y5  | 75.6  | 122.6 |
| 511 | IPI00285029.1 | SLGLSLEETPVVFENVSFHQATILPK             | 952.8474  | 3 | 24 | y++10 | 1.25  | 25.3  |
| 512 | IPI00285029.1 | SLGLSLEETPVVFENVSFHQATILPK             | 952.8477  | 3 | 30 |       | 0     | 30.0  |
| 513 | IPI00285029.1 | SLGLSLEETPVVFENVSFHQATILPK             | 952.8441  | 3 | 35 |       | 0     | 35.0  |
| 514 | IPI00285029.1 | TGGLAFHSYFMEGIAPTLLQALK                | 822.7697  | 3 | 15 | P y8  | 30.4  | 45.4  |
| 515 | IPI00285029.1 | TGTVALEVR                              | 473.2723  | 2 | 62 | y4    | 15.6  | 77.6  |
| 516 | IPI00285029.1 | TLEAVQDLLEQGRQHSQDLAFVSMNDIAATPTAAMPFR | 1072.5152 | 4 | 24 | P y8  | 20.1  | 44.1  |
| 517 | IPI00285029.1 | TLEGGSGLESIIIIHSSLAEPR                 | 817.1287  | 3 | 31 |       | 0     | 31.0  |
| 518 | IPI00285029.1 | TLEGGSGLESIIIIHSSLAEPR                 | 817.4492  | 3 | 36 | b4    | 20.55 | 56.6  |
| 519 | IPI00285029.1 | TLEGGSGLESIIIIHSSLAEPR                 | 817.4489  | 3 | 42 | y++14 | 4.7   | 46.7  |
| 520 | IPI00285029.1 | TLEGGSGLESIIIIHSSLAEPR                 | 817.4519  | 3 | 52 |       | 0     | 52.0  |
| 521 | IPI00285029.1 | VAEVLAGEGHLYSR                         | 500.9325  | 3 | 37 | y++12 | 66.55 | 103.6 |
| 522 | IPI00285029.1 | VAEVLAGEGHLYSR                         | 750.9078  | 2 | 74 | y8    | 33.75 | 107.8 |
| 523 | IPI00285029.1 | VHLTGINVPNALFPPVEFPAPR                 | 834.1219  | 3 | 17 |       | 0     | 17.0  |
| 524 | IPI00285029.1 | VHLTGINVPNALFPPVEFPAPR                 | 834.1219  | 3 | 25 | y5    | 7.7   | 32.7  |
| 525 | IPI00285029.1 | VLEALLPLK                              | 498.3286  | 2 | 46 | y4    | 83.9  | 129.9 |
| 526 | IPI00285029.1 | VLLSLEHG V WAPNLHFHNP NPEIPALLDGR      | 839.9489  | 4 | 21 | P y7  | 23.75 | 44.8  |
| 527 | IPI00285029.1 | VLVQVREEEPEAVLPGAQPTLISAISK            | 958.8713  | 3 | 20 |       | 0     | 20.0  |
| 528 | IPI00285029.1 | VQEVQQVSTNK                            | 630.3330  | 2 | 57 | c b7  | 23.75 | 80.8  |
| 529 | IPI00285029.1 | VSVHIIEGDHR                            | 631.3360  | 2 | 27 | c b9  | 30.4  | 57.4  |
| 530 | IPI00285029.1 | VSVHIIEGDHR                            | 421.2263  | 3 | 46 | y5    | 18.5  | 64.5  |

|     |               |                                          |           |   |    |         |       |       |
|-----|---------------|------------------------------------------|-----------|---|----|---------|-------|-------|
| 531 | IPI00285029.1 | WLSTSIPEAQWQSSLAR                        | 981.0004  | 2 | 46 | c b6 P  | 13.65 | 59.7  |
| 532 | IPI00285029.1 | YHGNTVLLR                                | 536.7989  | 2 | 24 | y7      | 22.4  | 46.4  |
| 533 | IPI00111908.4 | AFAISGPFNVQFLVK                          | 819.4573  | 2 | 51 | c b6 P  | 29.45 | 80.5  |
| 534 | IPI00111908.4 | AFAISGPFNVQFLVK                          | 819.4574  | 2 | 55 | y++12   | 33.75 | 88.8  |
| 535 | IPI00111908.4 | AMLSTGFK                                 | 427.7261  | 2 | 18 | y6      | 49.6  | 67.6  |
| 536 | IPI00111908.4 | ELSEPSSTR                                | 503.2464  | 2 | 26 | P y5    | 38.2  | 64.2  |
| 537 | IPI00111908.4 | EPLFGISTGNIITGLAAGAK                     | 966.0378  | 2 | 56 | y9      | 40.2  | 96.2  |
| 538 | IPI00111908.4 | EVEMDAVGK                                | 489.2343  | 2 | 17 |         | 0     | 17.0  |
| 539 | IPI00111908.4 | GLNSDSVTEETLRK                           | 774.9121  | 2 | 53 | y++12   | 55.3  | 108.3 |
| 540 | IPI00111908.4 | GQILTMANPIIGNGGAPDTTARDELGLNK            | 980.1773  | 3 | 42 |         | 0     | 42.0  |
| 541 | IPI00111908.4 | GQILTMANPIIGNGGAPDTTARDELGLNK            | 980.1776  | 3 | 53 | P y++13 | 18.3  | 71.3  |
| 542 | IPI00111908.4 | GQNQPVLNITNR                             | 677.3671  | 2 | 78 | P y8    | 42.15 | 120.2 |
| 543 | IPI00111908.4 | GYSFGHPSSVAGEVVFNTGLGGYPEALTDPAYK        | 1130.2086 | 3 | 42 | y8      | 33.75 | 75.8  |
| 544 | IPI00111908.4 | IALGIPLPEIK                              | 582.3937  | 2 | 42 | P y6    | 38.2  | 80.2  |
| 545 | IPI00111908.4 | IAPSFAVESMEDALK                          | 804.4452  | 2 | 64 | y7      | 33.75 | 97.8  |
| 546 | IPI00111908.4 | IEFEGQSVDFVDPNK                          | 862.4105  | 2 | 56 | y4      | 44.5  | 100.5 |
| 547 | IPI00111908.4 | ILESDRK                                  | 430.7455  | 2 | 25 | y4      | 29.45 | 54.5  |
| 548 | IPI00111908.4 | ILESDRKEPLFGISTGNIITGLAAGAK              | 693.8886  | 4 | 17 |         | 0     | 17.0  |
| 549 | IPI00111908.4 | ILESDRKEPLFGISTGNIITGLAAGAK              | 693.8887  | 4 | 23 |         | 0     | 23.0  |
| 550 | IPI00111908.4 | LFATEATSDWLNANNVPATPVAVWPSQEGQNPSSLSSIRK | 1025.5161 | 4 | 15 |         | 0     | 15.0  |
| 551 | IPI00111908.4 | LFATEATSDWLNANNVPATPVAVWPSQEGQNPSSLSSIRK | 1025.7272 | 4 | 21 |         | 0     | 21.0  |
| 552 | IPI00111908.4 | LFATEATSDWLNANNVPATPVAVWPSQEGQNPSSLSSIRK | 1025.4656 | 4 | 33 |         | 0     | 33.0  |
| 553 | IPI00111908.4 | LRDADPILR                                | 534.8124  | 2 | 36 | c b5 P  | 38.2  | 74.2  |
| 554 | IPI00111908.4 | PALVASR                                  | 357.2188  | 2 | 41 | y5      | 49.6  | 90.6  |
| 555 | IPI00111908.4 | QADAVYFLPITPQFVTEVIK                     | 1140.6245 | 2 | 25 | c b8 P  | 5.55  | 30.6  |
| 556 | IPI00111908.4 | QADAVYFLPITPQFVTEVIK                     | 1140.6243 | 2 | 26 |         | 0     | 26.0  |
| 557 | IPI00111908.4 | QADAVYFLPITPQFVTEVIK                     | 1140.6241 | 2 | 27 | c b8 P  | 12.15 | 39.2  |
| 558 | IPI00111908.4 | QNLIAEVSTK                               | 552.3108  | 2 | 51 |         | 0     | 51.0  |
| 559 | IPI00111908.4 | RLPTLEQPIIPSDYVAIK                       | 685.0618  | 3 | 23 | P y8    | 58.1  | 81.1  |
| 560 | IPI00111908.4 | RLPTLEQPIIPSDYVAIK                       | 685.3952  | 3 | 27 | b5      | 14.55 | 41.6  |
| 561 | IPI00111908.4 | SLFHYP                                   | 411.7164  | 2 | 31 | y4      | 62.3  | 93.3  |
| 562 | IPI00111908.4 | TAHIVLEDGTK                              | 395.2153  | 3 | 24 | y5      | 27.2  | 51.2  |
| 563 | IPI00111908.4 | TFEESFQK                                 | 508.2406  | 2 | 19 | y6      | 49.6  | 68.6  |
| 564 | IPI00111908.4 | TVLMNPNIASVQTNEVGLK                      | 677.0316  | 3 | 35 | y7      | 31.95 | 67.0  |
| 565 | IPI00111908.4 | TVLMNPNIASVQTNEVGLK                      | 1015.0429 | 2 | 71 | y8      | 1.75  | 72.8  |
| 566 | IPI00111908.4 | TVLMNPNIASVQTNEVGLK                      | 1015.0428 | 2 | 74 | y8      | 12.15 | 86.2  |
| 567 | IPI00111908.4 | VAGLLVLNYSNDYNHWLTK                      | 764.7337  | 3 | 16 |         | 0     | 16.0  |
| 568 | IPI00111908.4 | VAGLLVLNYSNDYNHWLTK                      | 764.7336  | 3 | 22 | b6      | 13.65 | 35.7  |
| 569 | IPI00111908.4 | VMIGESIDEK                               | 560.7812  | 2 | 37 | y8      | 69.75 | 106.8 |
| 570 | IPI00111908.4 | VPAIYGVDR                                | 545.7983  | 2 | 39 | c b8    | 90.2  | 129.2 |
| 571 | IPI00111908.4 | VSQEHPVVLTK                              | 412.9030  | 3 | 15 | y++9    | 35.8  | 50.8  |

|     |               |                                |           |   |    |         |       |       |
|-----|---------------|--------------------------------|-----------|---|----|---------|-------|-------|
| 572 | IPI00111908.4 | VSQEHPVVLTK                    | 618.8519  | 2 | 52 | P y6    | 82.65 | 134.7 |
| 573 | IPI00336362.1 | ALQYFAGWADK                    | 635.3429  | 2 | 54 | y5      | 69.75 | 123.8 |
| 574 | IPI00336362.1 | EAGFPPGVNIVPGYGPTAGGAISSHMDIDK | 1018.8393 | 3 | 15 |         | 0     | 15.0  |
| 575 | IPI00336362.1 | EAGFPPGVNIVPGYGPTAGGAISSHMDIDK | 1018.8396 | 3 | 18 | P y++19 | 4.25  | 22.3  |
| 576 | IPI00336362.1 | EAGFPPGVNIVPGYGPTAGGAISSHMDIDK | 1018.8394 | 3 | 21 |         | 0     | 21.0  |
| 577 | IPI00336362.1 | EAGFPPGVNIVPGYGPTAGGAISSHMDIDK | 1018.8395 | 3 | 25 |         | 0     | 25.0  |
| 578 | IPI00336362.1 | EAGFPPGVNIVPGYGPTAGGAISSHMDIDK | 1018.8394 | 3 | 31 | b9      | 1.25  | 32.3  |
| 579 | IPI00336362.1 | ILGLIESGKK                     | 353.2254  | 3 | 20 | y6      | 36.1  | 56.1  |
| 580 | IPI00336362.1 | KYILGNPLNSGINQGPPQIDK          | 724.0600  | 3 | 48 | y6      | 69.75 | 117.8 |
| 581 | IPI00336362.1 | RANNTTYGLAAGVFTK               | 561.9665  | 3 | 18 | y5      | 29.45 | 47.5  |
| 582 | IPI00336362.1 | YILGNPLNSGINQGPPQIDK           | 1021.0429 | 2 | 48 | y8      | 19.15 | 67.2  |
| 583 | IPI00134950.1 | AHMTLDYTVQVPGTGR               | 615.6528  | 3 | 25 | P y5    | 41    | 66.0  |
| 584 | IPI00134950.1 | AHMTLDYTVQVPGTGR               | 923.4741  | 2 | 51 | P y5    | 16.9  | 67.9  |
| 585 | IPI00134950.1 | AHMTLDYTVQVPGTGR               | 922.9694  | 2 | 74 | c b7    | 29.45 | 103.5 |
| 586 | IPI00134950.1 | AWLLGLLR                       | 471.3006  | 2 | 39 | y6      | 69.75 | 108.8 |
| 587 | IPI00134950.1 | AWLLGLLR                       | 471.3006  | 2 | 43 | y6      | 52.95 | 96.0  |
| 588 | IPI00134950.1 | AWLLGLLR                       | 471.3005  | 2 | 52 | y6      | 65.15 | 117.2 |
| 589 | IPI00134950.1 | DGSPGFSK                       | 794.3681  | 1 | 21 | y7      | 33.75 | 54.8  |
| 590 | IPI00134950.1 | DITTSVLTVNNK                   | 652.8581  | 2 | 61 | y6      | 49.6  | 110.6 |
| 591 | IPI00134950.1 | DITTSVLTVNNK                   | 652.8562  | 2 | 61 | y5      | 57.05 | 118.1 |
| 592 | IPI00134950.1 | EPSFDNWWIEEANWLTLDK            | 1154.0550 | 2 | 52 |         | 0     | 52.0  |
| 593 | IPI00134950.1 | GFSVMSVDASDK                   | 621.7607  | 2 | 21 | c b9    | 4.95  | 26.0  |
| 594 | IPI00134950.1 | NIASMVRPGLLVIDHR               | 617.0154  | 3 | 21 | y4      | 15.6  | 36.6  |
| 595 | IPI00134950.1 | NIASMVRPGLLVIDHR               | 617.0223  | 3 | 22 | y4      | 29.45 | 51.5  |
| 596 | IPI00134950.1 | NIASMVRPGLLVIDHR               | 616.6809  | 3 | 31 | y5      | 16.9  | 47.9  |
| 597 | IPI00134950.1 | NIASMVRPGLLVIDHR               | 616.6903  | 3 | 33 |         | 0     | 33.0  |
| 598 | IPI00134950.1 | NIYYK                          | 700.3664  | 1 | 28 |         | 0     | 28.0  |
| 599 | IPI00134950.1 | RKEPSFDNWWIEEANWLTLDK          | 648.5797  | 4 | 22 | y4      | 41    | 63.0  |
| 600 | IPI00134950.1 | RKEPSFDNWWIEEANWLTLDK          | 648.5814  | 4 | 25 | y4      | 57.05 | 82.1  |
| 601 | IPI00134950.1 | RKEPSFDNWWIEEANWLTLDK          | 648.3298  | 4 | 27 | y5      | 83.9  | 110.9 |
| 602 | IPI00134950.1 | RKEPSFDNWWIEEANWLTLDK          | 648.5796  | 4 | 27 |         | 0     | 27.0  |
| 603 | IPI00134950.1 | RKEPSFDNWWIEEANWLTLDK          | 648.8315  | 4 | 32 | y4      | 41    | 73.0  |
| 604 | IPI00134950.1 | RKEPSFDNWWIEEANWLTLDK          | 648.5797  | 4 | 34 | y4      | 75.6  | 109.6 |
| 605 | IPI00134950.1 | RKEPSFDNWWIEEANWLTLDK          | 864.4373  | 3 | 44 | y7      | 22.4  | 66.4  |
| 606 | IPI00134950.1 | RKEPSFDNWWIEEANWLTLDK          | 864.4741  | 3 | 53 | y7      | 41    | 94.0  |
| 607 | IPI00134950.1 | RKEPSFDNWWIEEANWLTLDK          | 864.4374  | 3 | 66 |         | 0     | 66.0  |
| 608 | IPI00134950.1 | RKEPSFDNWWIEEANWLTLDK          | 864.4372  | 3 | 68 | y4      | 49.1  | 117.1 |
| 609 | IPI00134950.1 | SLGVAAEGLPDQYADGEAAR           | 995.4746  | 2 | 73 | c b9 P  | 12.85 | 85.9  |
| 610 | IPI00134950.1 | SLGVAAEGLPDQYADGEAAR           | 995.4778  | 2 | 78 | c b9 P  | 44.3  | 122.3 |
| 611 | IPI00134950.1 | SLGVAAEGLPDQYADGEAAR           | 995.5308  | 2 | 87 | c b9 P  | 31.95 | 119.0 |
| 612 | IPI00134950.1 | VWQLYIGDTR                     | 625.8304  | 2 | 58 | y8      | 5.15  | 63.2  |

|     |               |                           |           |   |    |        |       |       |
|-----|---------------|---------------------------|-----------|---|----|--------|-------|-------|
| 613 | IPI00134950.1 | VWQLYIGDTR                | 625.8304  | 2 | 67 | y6     | 22.4  | 89.4  |
| 614 | IPI00314788.3 | AEAERDVLFPGYTHLQR         | 668.3486  | 3 | 18 | P y8   | 21.2  | 39.2  |
| 615 | IPI00314788.3 | AEAERDVLFPGYTHLQR         | 668.0163  | 3 | 24 | P y++8 | 62.3  | 86.3  |
| 616 | IPI00314788.3 | AEMQQILQGLDK              | 687.3585  | 2 | 61 | y6     | 77.6  | 138.6 |
| 617 | IPI00314788.3 | AEMQQILQGLDK              | 687.3814  | 2 | 66 | y6     | 46.75 | 112.8 |
| 618 | IPI00314788.3 | ALLQAQEP                  | 435.2400  | 2 | 25 | c b6   | 27.2  | 52.2  |
| 619 | IPI00314788.3 | AVFMAETK                  | 896.5085  | 1 | 38 | y6     | 116   | 154.0 |
| 620 | IPI00314788.3 | AVFMAETKGVALNLLS          | 560.9468  | 3 | 18 |        | 0     | 18.0  |
| 621 | IPI00314788.3 | EFSFVQLSDAYSTGSSLMPQK     | 1162.0511 | 2 | 79 | y4     | 23.35 | 102.4 |
| 622 | IPI00314788.3 | EFSFVQLSDAYSTGSSLMPQK     | 1162.0512 | 2 | 85 | y9     | 20.1  | 105.1 |
| 623 | IPI00314788.3 | EFSFVQLSDAYSTGSSLMPQK     | 1162.0511 | 2 | 88 | y9     | 11    | 99.0  |
| 624 | IPI00314788.3 | FVGAVDPIMEK               | 603.3166  | 2 | 34 | y9     | 55.3  | 89.3  |
| 625 | IPI00314788.3 | GLPSTYNK                  | 879.4808  | 1 | 30 | P y6   | 57.05 | 87.1  |
| 626 | IPI00314788.3 | HLWNVDVQGSK               | 641.8308  | 2 | 49 | y8     | 44.3  | 93.3  |
| 627 | IPI00314788.3 | KNPDSLELIR                | 395.5597  | 3 | 31 |        | 0     | 31.0  |
| 628 | IPI00314788.3 | KNPDSLELIR                | 592.8356  | 2 | 43 | P y8   | 30.4  | 73.4  |
| 629 | IPI00314788.3 | LHPNDEDIHTANER            | 415.9474  | 4 | 22 | y++9   | 5.85  | 27.9  |
| 630 | IPI00314788.3 | LHPNDEDIHTANER            | 554.2604  | 3 | 24 | c b7   | 14.55 | 38.6  |
| 631 | IPI00314788.3 | QALSPDMLATDLAYYLVR        | 1021.0311 | 2 | 49 | y7     | 12.85 | 61.9  |
| 632 | IPI00314788.3 | QALSPDMLATDLAYYLVR        | 680.6883  | 3 | 55 | y5     | 27.2  | 82.2  |
| 633 | IPI00314788.3 | QALSPDMLATDLAYYLVR        | 1020.5272 | 2 | 82 | y6     | 16.9  | 98.9  |
| 634 | IPI00314788.3 | RINVLPLGSGAIAGNPLGVDR     | 697.4015  | 3 | 44 | y8     | 30.4  | 74.4  |
| 635 | IPI00314788.3 | RINVLPLGSGAIAGNPLGVDRELLR | 650.8812  | 4 | 20 |        | 0     | 20.0  |
| 636 | IPI00314788.3 | RINVLPLGSGAIAGNPLGVDRELLR | 651.1306  | 4 | 27 |        | 0     | 27.0  |
| 637 | IPI00314788.3 | RINVLPLGSGAIAGNPLGVDRELLR | 867.8375  | 3 | 33 | b5 P   | 15.6  | 48.6  |
| 638 | IPI00314788.3 | RINVLPLGSGAIAGNPLGVDRELLR | 867.8382  | 3 | 37 | b5 P   | 25.35 | 62.4  |
| 639 | IPI00314788.3 | SRNDQVVTDLR               | 651.8423  | 2 | 39 | y7     | 12.85 | 51.9  |
| 640 | IPI00314788.3 | SSVEWQIR                  | 502.7620  | 2 | 52 | y5     | 41    | 93.0  |
| 641 | IPI00314788.3 | VAEWAQGTFFK               | 633.3123  | 2 | 57 | y6     | 97.85 | 154.9 |
| 642 | IPI00111950.1 | DIVLVAYSALGSHR            | 500.9437  | 3 | 29 | y++9   | 7.1   | 36.1  |
| 643 | IPI00111950.1 | DIVLVAYSALGSHR            | 751.0110  | 2 | 74 | y8     | 42.15 | 116.2 |
| 644 | IPI00111950.1 | DIVLVAYSALGSHR            | 751.0130  | 2 | 97 | y9     | 4.8   | 101.8 |
| 645 | IPI00111950.1 | ENMQVFEFQLTSEDMDK         | 988.9413  | 2 | 71 | y6     | 52.95 | 124.0 |
| 646 | IPI00111950.1 | ENMQVFEFQLTSEDMDK         | 988.4429  | 2 | 74 | y6     | 27.2  | 101.2 |
| 647 | IPI00111950.1 | ENMQVFEFQLTSEDMDK         | 988.9412  | 2 | 79 | y5     | 83.9  | 162.9 |
| 648 | IPI00111950.1 | GVVVLAK                   | 343.2343  | 2 | 25 | y4     | 75.6  | 100.6 |
| 649 | IPI00111950.1 | HIDSASMYQNEK              | 474.8828  | 3 | 21 | y5     | 69.75 | 90.8  |
| 650 | IPI00111950.1 | HIDSASMYQNEK              | 711.8215  | 2 | 58 | y5     | 41    | 99.0  |
| 651 | IPI00111950.1 | IADGTVKR                  | 430.2536  | 2 | 40 | y5     | 29.45 | 69.5  |
| 652 | IPI00111950.1 | IAIDAGFR                  | 862.4956  | 1 | 16 | y4     | 20.55 | 36.6  |
| 653 | IPI00111950.1 | KYNRTPALIALR              | 472.6217  | 3 | 22 |        | 0     | 22.0  |



|     |               |                             |           |   |    |       |       |       |
|-----|---------------|-----------------------------|-----------|---|----|-------|-------|-------|
| 654 | IPI00111950.1 | QLQLDYVDLYLIHFPAMAMK        | 780.0906  | 3 | 30 | y7    | 58.1  | 88.1  |
| 655 | IPI00111950.1 | QLQLDYVDLYLIHFPAMMKPGENYLPK | 1080.2218 | 3 | 29 |       | 0     | 29.0  |
| 656 | IPI00111950.1 | QLQLDYVDLYLIHFPAMMKPGENYLPK | 1079.8891 | 3 | 34 | P y8  | 21.2  | 55.2  |
| 657 | IPI00111950.1 | QWVDQSSPVLLDNPVLGSMAMK      | 1143.0894 | 2 | 62 | y6    | 14.55 | 76.6  |
| 658 | IPI00111950.1 | QWVDQSSPVLLDNPVLGSMAMK      | 1143.0896 | 2 | 76 | P y8  | 5.35  | 81.4  |
| 659 | IPI00111950.1 | QWVDQSSPVLLDNPVLGSMAMK      | 1143.0890 | 2 | 77 | P y8  | 21.2  | 98.2  |
| 660 | IPI00111950.1 | QWVDQSSPVLLDNPVLGSMAMK      | 1143.0894 | 2 | 79 | P y8  | 33.75 | 112.8 |
| 661 | IPI00111950.1 | SIGVSNFNR                   | 497.2595  | 2 | 36 | y5    | 29.45 | 65.5  |
| 662 | IPI00111950.1 | SIGVSNFNRR                  | 575.3097  | 2 | 16 |       | 0     | 16.0  |
| 663 | IPI00111950.1 | SIGVSNFNRR                  | 575.3110  | 2 | 18 |       | 0     | 18.0  |
| 664 | IPI00111950.1 | VLDDLK                      | 408.7271  | 2 | 37 | y5    | 52.95 | 90.0  |
| 665 | IPI00111950.1 | YISGSSF                     | 444.7269  | 2 | 23 | y6    | 25.35 | 48.4  |
| 666 | IPI00230440.3 | AGIPVFAWK                   | 494.7850  | 2 | 42 | P y6  | 69.75 | 111.8 |
| 667 | IPI00230440.3 | ALDIAENEMPGLMR              | 780.3818  | 2 | 21 | P y5  | 57.05 | 78.1  |
| 668 | IPI00230440.3 | ALDIAENEMPGLMR              | 780.3961  | 2 | 33 | P y5  | 41    | 74.0  |
| 669 | IPI00230440.3 | ALDIAENEMPGLMR              | 780.8837  | 2 | 42 | P y5  | 27.2  | 69.2  |
| 670 | IPI00230440.3 | DGPLNMILDDGGDLTNIHTK        | 751.7257  | 3 | 30 |       | 0     | 30.0  |
| 671 | IPI00230440.3 | DGPLNMILDDGGDLTNIHTK        | 751.7151  | 3 | 30 |       | 0     | 30.0  |
| 672 | IPI00230440.3 | DGPLNMILDDGGDLTNIHTK        | 751.3903  | 3 | 35 |       | 0     | 35.0  |
| 673 | IPI00230440.3 | DGPLNMILDDGGDLTNIHTK        | 1127.0659 | 2 | 71 | y8    | 22.4  | 93.4  |
| 674 | IPI00230440.3 | DGPLNMILDDGGDLTNIHTK        | 1127.0720 | 2 | 74 |       | 0     | 74.0  |
| 675 | IPI00230440.3 | DGPLNMILDDGGDLTNIHTK        | 1127.0716 | 2 | 81 | y5    | 7.7   | 88.7  |
| 676 | IPI00230440.3 | EMYSASKPLK                  | 577.2996  | 2 | 27 | y7    | 46.75 | 73.8  |
| 677 | IPI00230440.3 | ESLIDGIK                    | 437.7480  | 2 | 38 |       | 0     | 38.0  |
| 678 | IPI00230440.3 | ESLIDGIK                    | 874.5137  | 1 | 39 |       | 0     | 39.0  |
| 679 | IPI00230440.3 | GISEETTTGVHNLK              | 824.9455  | 2 | 56 | y5    | 57.05 | 113.1 |
| 680 | IPI00230440.3 | GISEETTTGVHNLK              | 824.9287  | 2 | 68 | y8    | 35.8  | 103.8 |
| 681 | IPI00230440.3 | HFEQMK                      | 410.1948  | 2 | 22 | y4    | 44.5  | 66.5  |
| 682 | IPI00230440.3 | IILLAAGR                    | 442.7822  | 2 | 49 | y6    | 77.6  | 126.6 |
| 683 | IPI00230440.3 | KLDEAVAEHLGK                | 460.9209  | 3 | 47 | y7    | 65.15 | 112.2 |
| 684 | IPI00230440.3 | KLDEAVAEHLGK                | 460.9209  | 3 | 58 | y7    | 49.6  | 107.6 |
| 685 | IPI00230440.3 | MREMYSASK                   | 368.1722  | 3 | 23 | y5    | 41    | 64.0  |
| 686 | IPI00230440.3 | MREMYSASK                   | 551.7551  | 2 | 44 | b8    | 33.75 | 77.8  |
| 687 | IPI00230440.3 | MREMYSASKPLK                | 480.9168  | 3 | 49 | c b4  | 29.45 | 78.5  |
| 688 | IPI00230440.3 | RATDVMIAGK                  | 354.5309  | 3 | 32 | b4    | 27.2  | 59.2  |
| 689 | IPI00230440.3 | SDKLPYK                     | 446.7428  | 2 | 33 |       | 0     | 33.0  |
| 690 | IPI00230440.3 | VADIGLAAWGR                 | 564.8123  | 2 | 52 | y7    | 12.85 | 64.9  |
| 691 | IPI00230440.3 | VADIGLAAWGRK                | 419.5751  | 3 | 31 |       | 0     | 31.0  |
| 692 | IPI00230440.3 | VNIKPQVDYWLK                | 553.9848  | 3 | 19 | y++12 | 10.5  | 29.5  |
| 693 | IPI00230440.3 | VPAINVNDVTK                 | 628.8463  | 2 | 52 | y6    | 65.15 | 117.2 |
| 694 | IPI00230440.3 | VPAINVNDVTK                 | 628.8463  | 2 | 64 | y8    | 58.1  | 122.1 |

|     |               |                     |           |   |    |        |       |       |
|-----|---------------|---------------------|-----------|---|----|--------|-------|-------|
| 695 | IPI00230440.3 | VPAINVNDVTK         | 629.3380  | 2 | 64 |        | 0     | 64.0  |
| 696 | IPI00230440.3 | WLNENAVEK           | 1102.5532 | 1 | 18 |        | 0     | 18.0  |
| 697 | IPI00230440.3 | YPVGVHFLPK          | 578.8298  | 2 | 44 | c b8   | 31.95 | 76.0  |
| 698 | IPI00230212.3 | ADIVENQVMDTR        | 695.8368  | 2 | 72 | y8     | 22.4  | 94.4  |
| 699 | IPI00230212.3 | HHLDGETEEER         | 676.2985  | 2 | 42 | y7     | 46.75 | 88.8  |
| 700 | IPI00230212.3 | HHLDGETEEER         | 451.2006  | 3 | 54 | y4     | 29.45 | 83.5  |
| 701 | IPI00230212.3 | HHLDGETEEERIR       | 540.9294  | 3 | 18 | b6     | 6.2   | 24.2  |
| 702 | IPI00230212.3 | HHLDGETEEERIR       | 405.9488  | 4 | 34 | y++10  | 7.1   | 41.1  |
| 703 | IPI00230212.3 | HHLDGETEEERIR       | 810.9030  | 2 | 45 | y4     | 29.45 | 74.5  |
| 704 | IPI00230212.3 | IRADIVENQVMDTR      | 553.9562  | 3 | 30 | y4     | 27.2  | 57.2  |
| 705 | IPI00230212.3 | IRADIVENQVMDTR      | 830.4964  | 2 | 50 |        | 0     | 50.0  |
| 706 | IPI00230212.3 | ISAYMK              | 356.6885  | 2 | 21 | y5     | 62.3  | 83.3  |
| 707 | IPI00230212.3 | ISAYMK              | 712.3693  | 1 | 27 | c b4   | 1.25  | 28.3  |
| 708 | IPI00230212.3 | ITQSNAILR           | 1015.5908 | 1 | 18 |        | 0     | 18.0  |
| 709 | IPI00230212.3 | ITQSNAILR           | 508.2987  | 2 | 54 | y6     | 52.95 | 107.0 |
| 710 | IPI00230212.3 | KHHLDGETEEER        | 740.3457  | 2 | 33 | y8     | 46.75 | 79.8  |
| 711 | IPI00230212.3 | KHHLDGETEEERIR      | 583.6273  | 3 | 24 |        | 0     | 24.0  |
| 712 | IPI00230212.3 | LGLDFPNLPYLIDGSHK   | 634.0061  | 3 | 32 | c b5 P | 18.5  | 50.5  |
| 713 | IPI00230212.3 | LGLDFPNLPYLIDGSHK   | 634.0078  | 3 | 33 | c b5 P | 15.6  | 48.6  |
| 714 | IPI00230212.3 | LGLDFPNLPYLIDGSHK   | 633.6770  | 3 | 35 | y++15  | 54.8  | 89.8  |
| 715 | IPI00230212.3 | LGLDFPNLPYLIDGSHK   | 633.6845  | 3 | 38 |        | 0     | 38.0  |
| 716 | IPI00230212.3 | LGLDFPNLPYLIDGSHK   | 950.0068  | 2 | 51 | y7     | 23.75 | 74.8  |
| 717 | IPI00230212.3 | LYSEFLGK            | 956.5477  | 1 | 28 |        | 0     | 28.0  |
| 718 | IPI00230212.3 | MAHWSNK             | 437.2055  | 2 | 31 | y4     | 15.6  | 46.6  |
| 719 | IPI00230212.3 | MLLEYTDSSYDEK       | 797.3535  | 2 | 41 |        | 0     | 41.0  |
| 720 | IPI00230212.3 | PMILGYWNVN          | 625.3443  | 2 | 30 | y6     | 25.35 | 55.4  |
| 721 | IPI00230212.3 | PMILGYWNVN          | 624.8424  | 2 | 46 | y6     | 25.35 | 71.4  |
| 722 | IPI00230212.3 | PMILGYWNVN          | 624.8310  | 2 | 54 | y6     | 27.2  | 81.2  |
| 723 | IPI00230212.3 | PMILGYWNVN          | 624.8324  | 2 | 59 | y6     | 41    | 100.0 |
| 724 | IPI00230212.3 | RPWFAGDK            | 488.7536  | 2 | 29 | c b7   | 12.85 | 41.9  |
| 725 | IPI00230212.3 | RYTMGDAPDFDR        | 481.8829  | 3 | 30 | c b7 P | 12.15 | 42.2  |
| 726 | IPI00230212.3 | RYTMGDAPDFDR        | 722.3258  | 2 | 47 |        | 0     | 47.0  |
| 727 | IPI00230212.3 | RYTMGDAPDFDRSQWLNEK | 777.3612  | 3 | 22 | b6     | 6.2   | 28.2  |
| 728 | IPI00230212.3 | RYTMGDAPDFDRSQWLNEK | 777.3612  | 3 | 24 | b6     | 13.65 | 37.7  |
| 729 | IPI00230212.3 | SQWLNEK             | 904.4879  | 1 | 27 | y5     | 41    | 68.0  |
| 730 | IPI00230212.3 | VTYVDFLAYDILDQYR    | 997.4929  | 2 | 19 | y7     | 13.65 | 32.7  |
| 731 | IPI00230212.3 | VTYVDFLAYDILDQYR    | 997.9943  | 2 | 23 | y4     | 29.45 | 52.5  |
| 732 | IPI00230212.3 | VTYVDFLAYDILDQYR    | 998.0033  | 2 | 23 | y7     | 12.85 | 35.9  |
| 733 | IPI00230212.3 | VTYVDFLAYDILDQYR    | 998.0036  | 2 | 25 | y7     | 52.95 | 78.0  |
| 734 | IPI00230212.3 | VTYVDFLAYDILDQYR    | 998.0035  | 2 | 30 | y4     | 44.5  | 74.5  |
| 735 | IPI00230212.3 | VTYVDFLAYDILDQYR    | 997.9998  | 2 | 37 |        | 0     | 37.0  |

|     |               |                          |           |   |    |        |       |       |
|-----|---------------|--------------------------|-----------|---|----|--------|-------|-------|
| 736 | IPI00230212.3 | VTYVDFLAYDILDQYR         | 997.9988  | 2 | 39 | y7     | 12.85 | 51.9  |
| 737 | IPI00230212.3 | VTYVDFLAYDILDQYR         | 998.0037  | 2 | 40 | y7     | 46.75 | 86.8  |
| 738 | IPI00230212.3 | VTYVDFLAYDILDQYR         | 997.4993  | 2 | 43 | y4     | 62.3  | 105.3 |
| 739 | IPI00230212.3 | VTYVDFLAYDILDQYR         | 998.0030  | 2 | 51 | y7     | 22.4  | 73.4  |
| 740 | IPI00230212.3 | VTYVDFLAYDILDQYR         | 998.0032  | 2 | 56 | y6     | 14.55 | 70.6  |
| 741 | IPI00230212.3 | VTYVDFLAYDILDQYR         | 665.3348  | 3 | 65 | y4     | 62.3  | 127.3 |
| 742 | IPI00230212.3 | YIATPIFSK                | 1039.5833 | 1 | 27 | P y5   | 69.75 | 96.8  |
| 743 | IPI00126120.1 | DGGQQFTEEFQTLNPMK        | 985.9517  | 2 | 46 | y4     | 55.9  | 101.9 |
| 744 | IPI00126120.1 | DGGQQFTEEFQTLNPMK        | 985.4508  | 2 | 54 | y4     | 44.5  | 98.5  |
| 745 | IPI00126120.1 | DGGQQFTEEFQTLNPMK        | 985.9513  | 2 | 74 | y4     | 41    | 115.0 |
| 746 | IPI00126120.1 | DGGQQFTEEFQTLNPMK        | 985.4509  | 2 | 75 | y7     | 1.6   | 76.6  |
| 747 | IPI00126120.1 | ELLALEVFQVSHPR           | 546.6388  | 3 | 34 |        | 0     | 34.0  |
| 748 | IPI00126120.1 | ELLALEVFQVSHPR           | 819.4569  | 2 | 74 | y8     | 31.95 | 106.0 |
| 749 | IPI00126120.1 | ELLALEVFQVSHPR           | 819.4570  | 2 | 82 | y7     | 33.75 | 115.8 |
| 750 | IPI00126120.1 | FKVDLSPYPTISHINK         | 620.3407  | 3 | 39 | P y8   | 20.1  | 59.1  |
| 751 | IPI00126120.1 | FKVDLSPYPTISHINK         | 620.3523  | 3 | 41 | P y8   | 22.4  | 63.4  |
| 752 | IPI00126120.1 | GIDYEIVPINLIK            | 743.9533  | 2 | 24 | P y6   | 49.6  | 73.6  |
| 753 | IPI00126120.1 | IALALK                   | 314.7234  | 2 | 31 | y5     | 97.85 | 128.9 |
| 754 | IPI00126120.1 | IDGITIVQSLAIMEYLEETRPIPR | 920.1692  | 3 | 20 | y++16  | 8.1   | 28.1  |
| 755 | IPI00126120.1 | IDGITIVQSLAIMEYLEETRPIPR | 920.1692  | 3 | 21 | b6     | 1.25  | 22.3  |
| 756 | IPI00126120.1 | IDGITIVQSLAIMEYLEETRPIPR | 920.1658  | 3 | 39 |        | 0     | 39.0  |
| 757 | IPI00126120.1 | IDGITIVQSLAIMEYLEETRPIPR | 920.1690  | 3 | 43 | y++14  | 26.5  | 69.5  |
| 758 | IPI00126120.1 | ILQSTAGK                 | 409.2428  | 2 | 33 | y5     | 35.8  | 68.8  |
| 759 | IPI00126120.1 | ILQSTAGK                 | 817.4809  | 1 | 40 | y5     | 25.35 | 65.4  |
| 760 | IPI00126120.1 | MISDLIASGIQPLQNLVSVLK    | 714.4094  | 3 | 44 | b6     | 65.15 | 109.2 |
| 761 | IPI00126120.1 | MISDLIASGIQPLQNLVSVLK    | 714.0763  | 3 | 44 | b9     | 6.6   | 50.6  |
| 762 | IPI00126120.1 | MISDLIASGIQPLQNLVSVLK    | 1079.1058 | 2 | 67 | c b6   | 7.1   | 74.1  |
| 763 | IPI00126120.1 | MISDLIASGIQPLQNLVSVLK    | 1071.1083 | 2 | 84 |        | 0     | 84.0  |
| 764 | IPI00126120.1 | MISDLIASGIQPLQNLVSVLK    | 1071.1082 | 2 | 96 |        | 0     | 96.0  |
| 765 | IPI00126120.1 | MQAGKPILYSYFR            | 808.4173  | 2 | 60 | y5     | 0.9   | 60.9  |
| 766 | IPI00126120.1 | QVGQENQMWAQK             | 787.8793  | 2 | 36 | y4     | 36.1  | 72.1  |
| 767 | IPI00126120.1 | RQPDTPAELRT              | 642.3380  | 2 | 20 | y7     | 46.75 | 66.8  |
| 768 | IPI00126120.1 | RQPDTPAELRT              | 642.3380  | 2 | 21 | c b4   | 29.45 | 50.5  |
| 769 | IPI00126120.1 | RQPDTPAELRT              | 428.5622  | 3 | 26 | c b5 P | 25.35 | 51.4  |
| 770 | IPI00126120.1 | VITSGFNALEK              | 589.8252  | 2 | 52 | y9     | 20.1  | 72.1  |
| 771 | IPI00228630.3 | AGGLATTGDK               | 445.7323  | 2 | 44 | y6     | 52.95 | 97.0  |
| 772 | IPI00228630.3 | AGGLATTGDKDILDIVPTEIHQK  | 798.4294  | 3 | 16 | P y7   | 46.75 | 62.8  |
| 773 | IPI00228630.3 | AGGLATTGDKDILDIVPTEIHQK  | 798.4642  | 3 | 16 | P y7   | 61.35 | 77.4  |
| 774 | IPI00228630.3 | AGGLATTGDKDILDIVPTEIHQK  | 798.4296  | 3 | 17 |        | 0     | 17.0  |
| 775 | IPI00228630.3 | AISSAVR                  | 703.4103  | 1 | 20 |        | 0     | 20.0  |
| 776 | IPI00228630.3 | AISSAVR                  | 352.2086  | 2 | 38 | y5     | 52.95 | 91.0  |

|     |               |                        |           |   |     |       |       |       |
|-----|---------------|------------------------|-----------|---|-----|-------|-------|-------|
| 777 | IPI00228630.3 | ANHAPFETDISTLTR        | 857.9264  | 2 | 39  | y6    | 15.6  | 54.6  |
| 778 | IPI00228630.3 | ANHAPFETDISTLTR        | 857.9232  | 2 | 61  | y6    | 6.6   | 67.6  |
| 779 | IPI00228630.3 | APVVMGSEDVQEFLEIYRK    | 766.4134  | 3 | 15  |       | 0     | 15.0  |
| 780 | IPI00228630.3 | APVVMGSEDVQEFLEIYRK    | 766.4205  | 3 | 23  |       | 0     | 23.0  |
| 781 | IPI00228630.3 | APVVMGSEDVQEFLEIYRK    | 766.7409  | 3 | 26  |       | 0     | 26.0  |
| 782 | IPI00228630.3 | DFDPAINYLQR            | 740.8554  | 2 | 25  | y6    | 38.2  | 63.2  |
| 783 | IPI00228630.3 | DFDPAINYLQRK           | 804.9043  | 2 | 51  | y7    | 22.4  | 73.4  |
| 784 | IPI00228630.3 | DILDIVPTEIHQK          | 507.6156  | 3 | 25  | P y7  | 33.75 | 58.8  |
| 785 | IPI00228630.3 | DILDIVPTEIHQK          | 760.9195  | 2 | 41  | P y7  | 77.6  | 118.6 |
| 786 | IPI00228630.3 | FVMEQGR                | 433.7132  | 2 | 37  | y5    | 49.6  | 86.6  |
| 787 | IPI00228630.3 | GNIYSLNEGYAK           | 664.8299  | 2 | 52  | y6    | 69.75 | 121.8 |
| 788 | IPI00228630.3 | KFPPDGSAPYGAR          | 454.8985  | 3 | 22  | P y5  | 35.8  | 57.8  |
| 789 | IPI00228630.3 | KGNIYSLNEGYAK          | 728.8801  | 2 | 61  | y8    | 31.95 | 93.0  |
| 790 | IPI00228630.3 | KLDILSNDLVINMLK        | 577.0026  | 3 | 21  | y6    | 89    | 110.0 |
| 791 | IPI00228630.3 | KLDILSNDLVINMLK        | 864.9999  | 2 | 70  | y7    | 25.35 | 95.4  |
| 792 | IPI00228630.3 | KLDILSNDLVINMLK        | 864.9996  | 2 | 79  | c b5  | 38.2  | 117.2 |
| 793 | IPI00228630.3 | KLDILSNDLVINMLK        | 864.9998  | 2 | 91  | y5    | 27.2  | 118.2 |
| 794 | IPI00228630.3 | QAGIAQLYGIAGSTNVTGDQVK | 1096.5700 | 2 | 71  | y6    | 6.6   | 77.6  |
| 795 | IPI00228630.3 | QAGIAQLYGIAGSTNVTGDQVK | 1096.5702 | 2 | 102 | y6    | 25.35 | 127.4 |
| 796 | IPI00228630.3 | TLVYGGIFLYPANK         | 778.4283  | 2 | 27  | P y4  | 41    | 68.0  |
| 797 | IPI00228630.3 | TLVYGGIFLYPANK         | 778.4285  | 2 | 29  | P y4  | 44.5  | 73.5  |
| 798 | IPI00228630.3 | TLVYGGIFLYPANK         | 778.4309  | 2 | 33  | P y4  | 41    | 74.0  |
| 799 | IPI00228630.3 | TLVYGGIFLYPANKK        | 561.9876  | 3 | 20  |       | 0     | 20.0  |
| 800 | IPI00228630.3 | TLVYGGIFLYPANKK        | 842.5001  | 2 | 53  | P y5  | 16.9  | 69.9  |
| 801 | IPI00228630.3 | YVGSMVADIHR            | 416.5448  | 3 | 20  |       | 0     | 20.0  |
| 802 | IPI00228630.3 | YVGSMVADIHR            | 624.3150  | 2 | 49  | y9    | 38.5  | 87.5  |
| 803 | IPI00228630.3 | YVGSMVADIHR            | 624.3150  | 2 | 64  | y9    | 10.5  | 74.5  |
| 804 | IPI00319994.4 | DLADELALVDVMEDK        | 559.2745  | 3 | 33  | y6    | 52.95 | 86.0  |
| 805 | IPI00319994.4 | DLADELALVDVMEDK        | 838.4086  | 2 | 50  | c b9  | 30.4  | 80.4  |
| 806 | IPI00319994.4 | GEMMDLQHGSFLK          | 536.2705  | 3 | 16  | y++10 | 33.75 | 49.8  |
| 807 | IPI00319994.4 | GEMMDLQHGSFLK          | 803.3920  | 2 | 64  | c b8  | 1.95  | 66.0  |
| 808 | IPI00319994.4 | GYTSWAIGLSVADLAESIMK   | 1056.5390 | 2 | 86  | y9    | 30.4  | 116.4 |
| 809 | IPI00319994.4 | ISGFPK                 | 324.6895  | 2 | 23  |       | 0     | 23.0  |
| 810 | IPI00319994.4 | LKGEMMDLQHGSFLK        | 616.6596  | 3 | 15  | c b7  | 5.55  | 20.6  |
| 811 | IPI00319994.4 | LKGEMMDLQHGSFLK        | 616.3261  | 3 | 21  | c b7  | 1.75  | 22.8  |
| 812 | IPI00319994.4 | LLIVSNPVDILTYVAXK      | 973.0603  | 2 | 19  |       | 0     | 19.0  |
| 813 | IPI00319994.4 | LLIVSNPVDILTYVAXK      | 649.0462  | 3 | 37  |       | 0     | 37.0  |
| 814 | IPI00319994.4 | LLIVSNPVDILTYVAXK      | 649.0462  | 3 | 37  |       | 0     | 37.0  |
| 815 | IPI00319994.4 | LLIVSNPVDILTYVAXK      | 973.0692  | 2 | 71  |       | 0     | 71.0  |
| 816 | IPI00319994.4 | LLIVSNPVDILTYVAXK      | 973.0694  | 2 | 77  |       | 0     | 77.0  |
| 817 | IPI00319994.4 | LLIVSNPVDILTYVAXK      | 973.0651  | 2 | 80  |       | 0     | 80.0  |

|     |               |                            |          |   |     |        |       |       |
|-----|---------------|----------------------------|----------|---|-----|--------|-------|-------|
| 818 | IPI00319994.4 | LLIVSNPVDILTYVAXK          | 973.0694 | 2 | 82  | c b6 P | 1.25  | 83.3  |
| 819 | IPI00319994.4 | LLIVSNPVDILTYVAXK          | 972.5659 | 2 | 92  |        | 0     | 92.0  |
| 820 | IPI00319994.4 | LNLVQR                     | 371.7320 | 2 | 41  | y4     | 41    | 82.0  |
| 821 | IPI00319994.4 | LVIIITAGAR                 | 457.2954 | 2 | 46  | y5     | 14.55 | 60.6  |
| 822 | IPI00319994.4 | LVIIITAGAR                 | 457.2954 | 2 | 52  | y5     | 41    | 93.0  |
| 823 | IPI00319994.4 | NVNIFK                     | 367.7136 | 2 | 25  |        | 0     | 25.0  |
| 824 | IPI00319994.4 | NVNIFK                     | 734.4256 | 1 | 30  | c b4   | 62.3  | 92.3  |
| 825 | IPI00319994.4 | RVHPISTMIK                 | 591.3449 | 2 | 37  | c b8   | 12.15 | 49.2  |
| 826 | IPI00319994.4 | SADTLWGIQK                 | 559.7958 | 2 | 40  | y4     | 57.05 | 97.1  |
| 827 | IPI00319994.4 | SLNPELGTDADK               | 630.3091 | 2 | 59  | P y9   | 85.6  | 144.6 |
| 828 | IPI00319994.4 | SLNPELGTDADKEQWK           | 915.9472 | 2 | 56  |        | 0     | 56.0  |
| 829 | IPI00319994.4 | VTLTPEEEAR                 | 572.7959 | 2 | 38  | P y6   | 82.65 | 120.7 |
| 830 | IPI00319994.4 | YLMGER                     | 768.3717 | 1 | 16  |        | 0     | 16.0  |
| 831 | IPI00387492.1 | ALTVPELTQQMFDK             | 846.4363 | 2 | 34  | y5     | 38.2  | 72.2  |
| 832 | IPI00387492.1 | ALTVPELTQQMFDK             | 846.4363 | 2 | 50  | y4     | 25.35 | 75.4  |
| 833 | IPI00387492.1 | AVLVDLEPGTMDSVR            | 801.4112 | 2 | 16  | P y8   | 21.2  | 37.2  |
| 834 | IPI00387492.1 | AVLVDLEPGTMDSVR            | 801.4174 | 2 | 21  | P y8   | 30.4  | 51.4  |
| 835 | IPI00387492.1 | AVLVDLEPGTMDSVR            | 801.4113 | 2 | 32  | P y8   | 30.4  | 62.4  |
| 836 | IPI00387492.1 | AVLVDLEPGTMDSVR            | 801.4143 | 2 | 39  | P y8   | 58.1  | 97.1  |
| 837 | IPI00387492.1 | EVDEQMLNVQNK               | 723.8561 | 2 | 30  | y5     | 25.35 | 55.4  |
| 838 | IPI00387492.1 | GHYTEGAELVDSVLDVVRK        | 696.3738 | 3 | 42  | y4     | 18.5  | 60.5  |
| 839 | IPI00387492.1 | IMNTFSVVPSPK               | 660.3591 | 2 | 63  | y5     | 41    | 104.0 |
| 840 | IPI00387492.1 | IREEYPDR                   | 359.8493 | 3 | 19  | c b5 P | 14.55 | 33.6  |
| 841 | IPI00387492.1 | IREEYPDR                   | 539.2700 | 2 | 31  | c b7   | 33.75 | 64.8  |
| 842 | IPI00387492.1 | LAVNMVPFPR                 | 572.3211 | 2 | 58  | P y4   | 15.6  | 73.6  |
| 843 | IPI00387492.1 | LHFFMPGFAPLTSR             | 810.9508 | 2 | 41  | P y9   | 40.2  | 81.2  |
| 844 | IPI00387492.1 | MSATFIGNSTAIQELFK          | 929.9779 | 2 | 71  | y7     | 22.4  | 93.4  |
| 845 | IPI00387492.1 | MSATFIGNSTAIQELFK          | 929.9778 | 2 | 77  | y5     | 49.1  | 126.1 |
| 846 | IPI00387492.1 | MSATFIGNSTAIQELFK          | 929.4757 | 2 | 82  |        | 0     | 82.0  |
| 847 | IPI00387492.1 | MSATFIGNSTAIQELFK          | 929.9779 | 2 | 103 | y5     | 44.5  | 147.5 |
| 848 | IPI00387492.1 | NSSYFVEWIPNNVK             | 848.9181 | 2 | 50  | P y5   | 52.95 | 103.0 |
| 849 | IPI00387492.1 | RISEQFTAMFR                | 693.3528 | 2 | 52  | c b4   | 29.45 | 81.5  |
| 850 | IPI00387492.1 | SGPFGQIFRPDNFVFGQSGAGNNWAK | 934.1207 | 3 | 35  | y9     | 31.95 | 67.0  |
| 851 | IPI00387492.1 | SGPFGQIFRPDNFVFGQSGAGNNWAK | 933.7876 | 3 | 59  | y6     | 7.1   | 66.1  |
| 852 | IPI00387492.1 | SGPFGQIFRPDNFVFGQSGAGNNWAK | 933.7877 | 3 | 61  | y8     | 6.2   | 67.2  |
| 853 | IPI00387492.1 | SGPFGQIFRPDNFVFGQSGAGNNWAK | 933.7873 | 3 | 68  | y8     | 5.55  | 73.6  |
| 854 | IPI00310669.2 | AAPGDRTMLDSLWAAAQEFQAWK    | 855.4420 | 3 | 19  |        | 0     | 19.0  |
| 855 | IPI00310669.2 | AAPTEPPEAPEATAAGGVTSK      | 976.4843 | 2 | 64  | c b9 P | 5.35  | 69.4  |
| 856 | IPI00310669.2 | AILEVLQTQGA                | 571.8251 | 2 | 57  | c b6   | 75.6  | 132.6 |
| 857 | IPI00310669.2 | ASYISSAQLDQDPGAVAAAAIFR    | 807.4158 | 3 | 54  | y5     | 29.45 | 83.5  |
| 858 | IPI00310669.2 | ASYISSAQLDQDPGAVAAAAIFR    | 807.4519 | 3 | 55  | y7     | 38.2  | 93.2  |

|     |               |                                  |           |   |    |         |       |       |
|-----|---------------|----------------------------------|-----------|---|----|---------|-------|-------|
| 859 | IPI00310669.2 | ASYISSAQLDQPDPGAVAAAAIFR         | 1210.6153 | 2 | 73 | c b9    | 11    | 84.0  |
| 860 | IPI00310669.2 | ASYISSAQLDQPDPGAVAAAAIFR         | 1210.6158 | 2 | 76 | y5      | 29.45 | 105.5 |
| 861 | IPI00310669.2 | AVAQAGTVGTLIVK                   | 720.9418  | 2 | 78 | y7      | 46.75 | 124.8 |
| 862 | IPI00310669.2 | EGPSLTSPAQVLSR                   | 721.4011  | 2 | 15 |         | 0     | 15.0  |
| 863 | IPI00310669.2 | GRVALLSGGGSGHEPAHAGFIGK          | 544.5413  | 4 | 22 | y++12   | 21.2  | 43.2  |
| 864 | IPI00310669.2 | IAPVDQIVTLMLDHMTNTSNIFHVPVR      | 1021.8772 | 3 | 35 |         | 0     | 35.0  |
| 865 | IPI00310669.2 | LIDAETTAK                        | 481.2636  | 2 | 43 | y7      | 65.15 | 108.2 |
| 866 | IPI00310669.2 | LSVLLLER                         | 471.8031  | 2 | 52 | y4      | 27.2  | 79.2  |
| 867 | IPI00310669.2 | MGGSSGALYGLFLTAAQPLK             | 1027.5414 | 2 | 40 | y7      | 14.55 | 54.6  |
| 868 | IPI00310669.2 | NYTGDRLNFLAMEQAK                 | 643.3182  | 3 | 20 |         | 0     | 20.0  |
| 869 | IPI00310669.2 | NYTGDRLNFLAMEQAK                 | 643.6550  | 3 | 29 | y5      | 52.95 | 82.0  |
| 870 | IPI00310669.2 | QMALVLDR                         | 473.2630  | 2 | 37 | y4      | 27.2  | 64.2  |
| 871 | IPI00310669.2 | TDLPTWSAAMDAGLESMQK              | 1026.9814 | 2 | 33 | y9      | 46.75 | 79.8  |
| 872 | IPI00310669.2 | TMLDSLWAAQEFQAWK                 | 666.3281  | 3 | 33 | c b8    | 1.95  | 35.0  |
| 873 | IPI00310669.2 | TMLDSLWAAQEFQAWK                 | 665.9971  | 3 | 33 |         | 0     | 33.0  |
| 874 | IPI00310669.2 | VAGALAEEGMGLEEITK                | 859.4375  | 2 | 87 | y7      | 82.65 | 169.7 |
| 875 | IPI00310669.2 | VALLSGGGSGHEPAHAGFIGK            | 654.6787  | 3 | 19 | y++17   | 77.95 | 97.0  |
| 876 | IPI00310669.2 | VALRSDLDTLK                      | 615.8555  | 2 | 38 | c b8    | 31.95 | 70.0  |
| 877 | IPI00310669.2 | VSVTGRK                          | 373.7299  | 2 | 33 | y4      | 7.7   | 40.7  |
| 878 | IPI00319525.1 | AKPLTDQEK                        | 536.2879  | 2 | 27 | P y7    | 95.65 | 122.7 |
| 879 | IPI00319525.1 | APNDFNLQDFNVGDYIQAVALDR          | 842.0961  | 3 | 18 | y4      | 7.1   | 25.1  |
| 880 | IPI00319525.1 | APNDFNLQDFNVGDYIQAVALDR          | 842.4227  | 3 | 34 |         | 0     | 34.0  |
| 881 | IPI00319525.1 | APNDFNLQDFNVGDYIQAVALDRNLAENISR  | 1141.5705 | 3 | 75 |         | 0     | 75.0  |
| 882 | IPI00319525.1 | APNDFNLQDFNVGDYIQAVALDRNLAENISR  | 1141.9024 | 3 | 80 | b7      | 9.55  | 89.6  |
| 883 | IPI00319525.1 | AWEITKK                          | 438.2527  | 2 | 28 | y4      | 15.6  | 43.6  |
| 884 | IPI00319525.1 | DFSELEPKFQNK                     | 798.9829  | 2 | 36 | P y7    | 49.6  | 85.6  |
| 885 | IPI00319525.1 | DGMGTVFDAFPDQVAIQLNDTHPALAIPELMR | 1161.9108 | 3 | 68 | b9      | 1.75  | 69.8  |
| 886 | IPI00319525.1 | DHLVGR                           | 348.6930  | 2 | 24 | c b4    | 18.5  | 42.5  |
| 887 | IPI00319525.1 | DIINMLFYHDR                      | 479.9060  | 3 | 16 | c b6    | 29.45 | 45.5  |
| 888 | IPI00319525.1 | DIINMLFYHDR                      | 479.5714  | 3 | 16 |         | 0     | 16.0  |
| 889 | IPI00319525.1 | DIWNMEPSDLK                      | 674.3258  | 2 | 50 | P y5    | 57.05 | 107.1 |
| 890 | IPI00319525.1 | DLSQLTK                          | 402.7268  | 2 | 22 | y5      | 69.75 | 91.8  |
| 891 | IPI00319525.1 | DYYFALAHTVR                      | 678.3529  | 2 | 33 | y5      | 65.15 | 98.2  |
| 892 | IPI00319525.1 | HLEIYEINQK                       | 700.3868  | 2 | 46 | y6      | 77.6  | 123.6 |
| 893 | IPI00319525.1 | HLHFTLVK                         | 332.1992  | 3 | 23 | c b6    | 1.05  | 24.1  |
| 894 | IPI00319525.1 | IFVDIEKLPWAK                     | 486.9498  | 3 | 30 | y++8    | 0.9   | 30.9  |
| 895 | IPI00319525.1 | IHSDIVK                          | 406.2374  | 2 | 34 | c b6    | 14.55 | 48.6  |
| 896 | IPI00319525.1 | INPSSMFDVHVK                     | 458.5674  | 3 | 19 |         | 0     | 19.0  |
| 897 | IPI00319525.1 | INPSSMFDVHVK                     | 687.3553  | 2 | 65 | P y++10 | 65.15 | 130.2 |
| 898 | IPI00319525.1 | IREGWQVEEADDWLR                  | 634.9769  | 3 | 35 | y5      | 49.1  | 84.1  |
| 899 | IPI00319525.1 | IREGWQVEEADDWLR                  | 634.9769  | 3 | 35 | y5      | 32.3  | 67.3  |

|     |               |                              |           |   |    |         |        |       |
|-----|---------------|------------------------------|-----------|---|----|---------|--------|-------|
| 900 | IPI00319525.1 | LHSFVSDIFLR                  | 483.5897  | 3 | 20 |         | 0      | 20.0  |
| 901 | IPI00319525.1 | LITSVAEVVNDPVMVGSK           | 625.3303  | 3 | 42 |         | 0      | 42.0  |
| 902 | IPI00319525.1 | LITSVAEVVNDPVMVGSK           | 937.4902  | 2 | 61 | P y6    | 23.75  | 84.8  |
| 903 | IPI00319525.1 | LVIDQIDNGFFSPNQDLFK          | 1154.5881 | 2 | 45 | P y5    | 44.5   | 89.5  |
| 904 | IPI00319525.1 | LVIDQIDNGFFSPNQDLFK          | 1154.5882 | 2 | 50 |         | 0      | 50.0  |
| 905 | IPI00319525.1 | LVIDQIDNGFFSPNQDLFK          | 1154.5882 | 2 | 63 | P y5    | 57.05  | 120.1 |
| 906 | IPI00319525.1 | NLAENISR                     | 458.7458  | 2 | 23 | y6      | 38.2   | 61.2  |
| 907 | IPI00319525.1 | RIHEYKR                      | 334.5264  | 3 | 28 |         | 0      | 28.0  |
| 908 | IPI00319525.1 | TFAYTNHTVLPEALERWPVELVEK     | 948.5002  | 3 | 27 |         | 0      | 27.0  |
| 909 | IPI00319525.1 | VFADYEAYVK                   | 602.8123  | 2 | 47 | y7      | 90.2   | 137.2 |
| 910 | IPI00319525.1 | VIPATDLSEQISTAGTEASGTGNMK    | 827.0738  | 3 | 21 | y6      | 16.9   | 37.9  |
| 911 | IPI00319525.1 | VIPATDLSEQISTAGTEASGTGNMK    | 827.0738  | 3 | 27 | y6      | 1.4    | 28.4  |
| 912 | IPI00319525.1 | VSQLYMNQK                    | 555.7834  | 2 | 50 | y5      | 69.75  | 119.8 |
| 913 | IPI00319525.1 | WPVELVEK                     | 500.2797  | 2 | 37 | y6      | 65.15  | 102.2 |
| 914 | IPI00319525.1 | WVDTQVVLALPYDTPVPGYMNNTVNTMR | 1066.1959 | 3 | 28 | b8      | 6.6    | 34.6  |
| 915 | IPI00319525.1 | WVDTQVVLALPYDTPVPGYMNNTVNTMR | 1065.8645 | 3 | 37 | b8      | 13.65  | 50.7  |
| 916 | IPI00319525.1 | YEYGIFNQK                    | 581.2857  | 2 | 34 | y7      | 61.35  | 95.4  |
| 917 | IPI00323357.1 | ARFEELNADLFR                 | 494.2572  | 3 | 19 |         | 0      | 19.0  |
| 918 | IPI00323357.1 | ARFEELNADLFR                 | 740.9011  | 2 | 41 | y7      | 12.85  | 53.9  |
| 919 | IPI00323357.1 | EIAEAYLGK                    | 497.2668  | 2 | 34 |         | 0      | 34.0  |
| 920 | IPI00323357.1 | GTLDPVEK                     | 429.7327  | 2 | 18 | y6      | 41     | 59.0  |
| 921 | IPI00323357.1 | HWPFMVVNDAGRPK               | 551.9489  | 3 | 29 | y++13   | 27.7   | 56.7  |
| 922 | IPI00323357.1 | HWPFMVVNDAGRPK               | 551.9489  | 3 | 34 | P y++12 | 81.65  | 115.7 |
| 923 | IPI00323357.1 | IINEPTAAAIAYGLDK             | 553.9699  | 3 | 35 | y5      | 89     | 124.0 |
| 924 | IPI00323357.1 | IINEPTAAAIAYGLDK             | 830.5170  | 2 | 49 | y6      | 102.45 | 151.5 |
| 925 | IPI00323357.1 | ITNDKGR                      | 402.7268  | 2 | 20 |         | 0      | 20.0  |
| 926 | IPI00323357.1 | LLQDFFNGK                    | 541.2877  | 2 | 50 | y6      | 57.05  | 107.1 |
| 927 | IPI00323357.1 | MVNHFAIEFK                   | 412.5466  | 3 | 23 | y4      | 18.5   | 41.5  |
| 928 | IPI00323357.1 | NQTAEKEEFEHQK                | 582.6077  | 3 | 34 |         | 0      | 34.0  |
| 929 | IPI00323357.1 | NQTAEKEEFEHQK                | 873.4166  | 2 | 46 | y4      | 29.45  | 75.5  |
| 930 | IPI00323357.1 | NQVAMNPTNTVFDAK              | 825.4202  | 2 | 62 | P y9    | 66.55  | 128.6 |
| 931 | IPI00323357.1 | NSLESYAFNMK                  | 652.3136  | 2 | 55 | y8      | 44.3   | 99.3  |
| 932 | IPI00323357.1 | QTQTFTTYSNPGVLIQVYEGER       | 925.7805  | 3 | 37 | y5      | 25.35  | 62.4  |
| 933 | IPI00323357.1 | QTQTFTTYSNPGVLIQVYEGER       | 925.7839  | 3 | 43 | y5      | 14.55  | 57.6  |
| 934 | IPI00323357.1 | RFDDAVVQSDMK                 | 470.8946  | 3 | 38 | c b6    | 35.8   | 73.8  |
| 935 | IPI00323357.1 | RFDDAVVQSDMK                 | 705.8405  | 2 | 56 | c b4    | 15.6   | 71.6  |
| 936 | IPI00323357.1 | RTLSSSTQASIEIDSLYEGIDFYTSITR | 1052.1968 | 3 | 17 |         | 0      | 17.0  |
| 937 | IPI00323357.1 | RTLSSSTQASIEIDSLYEGIDFYTSITR | 1052.1954 | 3 | 18 | b4      | 1.25   | 19.3  |
| 938 | IPI00323357.1 | SFYPEEVSSMVLTK               | 808.8966  | 2 | 53 | y++13   | 18.3   | 71.3  |
| 939 | IPI00323357.1 | SFYPEEVSSMVLTK               | 808.8965  | 2 | 55 | y++13   | 4.7    | 59.7  |
| 940 | IPI00323357.1 | SFYPEEVSSMVLTK               | 808.8964  | 2 | 57 | y++13   | 4.8    | 61.8  |

|     |               |                         |           |   |    |        |       |       |
|-----|---------------|-------------------------|-----------|---|----|--------|-------|-------|
| 941 | IPI00323357.1 | SINPDEAVAYGAAVQAAILSGDK | 754.3949  | 3 | 30 | y4     | 7.1   | 37.1  |
| 942 | IPI00323357.1 | SINPDEAVAYGAAVQAAILSGDK | 1131.0760 | 2 | 74 |        | 0     | 74.0  |
| 943 | IPI00323357.1 | SQIHDIVLVGGSTR          | 741.4166  | 2 | 71 | y5     | 15.6  | 86.6  |
| 944 | IPI00323357.1 | STAGDTHLGGEDFDNR        | 846.3665  | 2 | 56 | c b8   | 11.55 | 67.6  |
| 945 | IPI00323357.1 | TTPSYVAFTDTER           | 744.3655  | 2 | 28 | y6     | 25.35 | 53.4  |
| 946 | IPI00323357.1 | TVTNAVVTVPAYFNDSQR      | 661.6704  | 3 | 24 | y++12  | 40.2  | 64.2  |
| 947 | IPI00323357.1 | TVTNAVVTVPAYFNDSQR      | 992.0062  | 2 | 28 |        | 0     | 28.0  |
| 948 | IPI00323357.1 | TVTNAVVTVPAYFNDSQR      | 991.5020  | 2 | 37 |        | 0     | 37.0  |
| 949 | IPI00110851.1 | AGFAGDDAPR              | 488.7276  | 2 | 61 | y7     | 25.35 | 86.4  |
| 950 | IPI00110851.1 | AVFPSIVGRPR             | 599.8570  | 2 | 29 | P y8   | 5.55  | 34.6  |
| 951 | IPI00110851.1 | AVFPSIVGRPR             | 599.8570  | 2 | 34 | P y8   | 0.9   | 34.9  |
| 952 | IPI00110851.1 | DLTDYLMK                | 998.4878  | 1 | 23 | y7     | 61.35 | 84.4  |
| 953 | IPI00110851.1 | DLYANTVLSSGTTMYPGIADR   | 1108.5428 | 2 | 62 | P y6   | 52.95 | 115.0 |
| 954 | IPI00110851.1 | DLYANTVLSSGTTMYPGIADR   | 1108.5427 | 2 | 66 | P y6   | 25.35 | 91.4  |
| 955 | IPI00110851.1 | DLYANTVLSSGTTMYPGIADR   | 1108.5427 | 2 | 73 | P y6   | 52.95 | 126.0 |
| 956 | IPI00110851.1 | DLYANTVLSSGTTMYPGIADR   | 1108.5427 | 2 | 83 |        | 0     | 83.0  |
| 957 | IPI00110851.1 | EITALAPSTMK             | 581.3128  | 2 | 30 | P y5   | 41    | 71.0  |
| 958 | IPI00110851.1 | GYSFTTTAER              | 566.7675  | 2 | 54 | y8     | 2.15  | 56.2  |
| 959 | IPI00110851.1 | GYSFTTTAEREIVR          | 815.4540  | 2 | 18 | y5     | 20.55 | 38.6  |
| 960 | IPI00110851.1 | GYSFTTTAEREIVR          | 543.9458  | 3 | 21 |        | 0     | 21.0  |
| 961 | IPI00110851.1 | HQGVMVGMGQK             | 391.1951  | 3 | 39 | c b5   | 16.9  | 55.9  |
| 962 | IPI00110851.1 | HQGVMVGMGQK             | 586.2891  | 2 | 49 | y9     | 66.55 | 115.6 |
| 963 | IPI00110851.1 | IIAPPERK                | 462.2877  | 2 | 30 | y6     | 38.2  | 68.2  |
| 964 | IPI00110851.1 | IWHHTFYNELR             | 505.9213  | 3 | 24 |        | 0     | 24.0  |
| 965 | IPI00110851.1 | IWHHTFYNELR             | 758.3917  | 2 | 32 | y7     | 5.85  | 37.9  |
| 966 | IPI00110851.1 | IWHHTFYNELR             | 505.9213  | 3 | 47 | y4     | 41    | 88.0  |
| 967 | IPI00110851.1 | LDLAGR                  | 322.6900  | 2 | 30 | y4     | 32.3  | 62.3  |
| 968 | IPI00110851.1 | LDLAGRDLTDYLMK          | 541.9524  | 3 | 18 |        | 0     | 18.0  |
| 969 | IPI00110851.1 | QEYDESGPSIVHR           | 758.8584  | 2 | 23 |        | 0     | 23.0  |
| 970 | IPI00110851.1 | QEYDESGPSIVHR           | 506.2393  | 3 | 43 |        | 0     | 43.0  |
| 971 | IPI00110851.1 | QEYDESGPSIVHRK          | 548.9382  | 3 | 17 | y4     | 16.9  | 33.9  |
| 972 | IPI00110851.1 | QEYDESGPSIVHRK          | 548.9382  | 3 | 25 |        | 0     | 25.0  |
| 973 | IPI00110851.1 | QEYDESGPSIVHRK          | 822.9300  | 2 | 30 | y++12  | 27.7  | 57.7  |
| 974 | IPI00110851.1 | SYELPDGQVITIGNER        | 896.4515  | 2 | 34 | y4     | 16.9  | 50.9  |
| 975 | IPI00110851.1 | SYELPDGQVITIGNER        | 895.9501  | 2 | 47 | y4     | 16.9  | 63.9  |
| 976 | IPI00110851.1 | SYELPDGQVITIGNER        | 895.9501  | 2 | 78 | y4     | 29.45 | 107.5 |
| 977 | IPI00110851.1 | VAPEEHPVLLTEAPLNPK      | 978.0397  | 2 | 27 | c b6 P | 25.35 | 52.4  |
| 978 | IPI00110851.1 | VAPEEHPVLLTEAPLNPK      | 978.0397  | 2 | 35 |        | 0     | 35.0  |
| 979 | IPI00128370.3 | DINAYNGETPTEKLPFPIIDDK  | 831.0853  | 3 | 23 | P y8   | 58.1  | 81.1  |
| 980 | IPI00128370.3 | FHDFLGDSWGILFSHR        | 508.5023  | 4 | 23 | b5     | 14.55 | 37.6  |
| 981 | IPI00128370.3 | FHDFLGDSWGILFSHR        | 677.6676  | 3 | 24 | y5     | 15.6  | 39.6  |



|      |               |                           |           |   |    |         |       |       |
|------|---------------|---------------------------|-----------|---|----|---------|-------|-------|
| 982  | IPI00128370.3 | GESVMVPTLSEEEAK           | 852.9664  | 2 | 36 | c b7 P  | 13.65 | 49.7  |
| 983  | IPI00128370.3 | GRDLAILLGMLDPVEK          | 580.6625  | 3 | 24 | P y4    | 69.9  | 93.9  |
| 984  | IPI00128370.3 | GRDLAILLGMLDPVEK          | 870.4882  | 2 | 69 |         | 0     | 69.0  |
| 985  | IPI00128370.3 | GRDLAILLGMLDPVEK          | 870.4879  | 2 | 73 |         | 0     | 73.0  |
| 986  | IPI00128370.3 | IRFHDFLGD SWGILF SHPR     | 575.7990  | 4 | 46 | y5      | 25.35 | 71.4  |
| 987  | IPI00128370.3 | KGESVMVPTLSEEEAK          | 611.6489  | 3 | 20 | c b8 P  | 33.75 | 53.8  |
| 988  | IPI00128370.3 | LIALSIDSVEDHLAWSK         | 949.0082  | 2 | 36 |         | 0     | 36.0  |
| 989  | IPI00128370.3 | LPFPIIDDK                 | 529.3040  | 2 | 33 | P y6    | 82.65 | 115.7 |
| 990  | IPI00128370.3 | LSILYPATTGR               | 596.3415  | 2 | 30 | y7      | 33.75 | 63.8  |
| 991  | IPI00128370.3 | NFDEILR                   | 453.7379  | 2 | 21 | y5      | 89    | 110.0 |
| 992  | IPI00128370.3 | NFDEILR                   | 906.5299  | 1 | 33 | y4      | 41    | 74.0  |
| 993  | IPI00128370.3 | PGGLLLGDEAPNFEANTTIGR     | 714.7102  | 3 | 46 | c b10 P | 31.95 | 78.0  |
| 994  | IPI00128370.3 | PGGLLLGDEAPNFEANTTIGR     | 1072.0474 | 2 | 60 | c b8    | 38.2  | 98.2  |
| 995  | IPI00128370.3 | PGGLLLGDEAPNFEANTTIGR     | 1072.0475 | 2 | 73 | b8      | 49.6  | 122.6 |
| 996  | IPI00128370.3 | PGGLLLGDEAPNFEANTTIGR     | 1072.0472 | 2 | 75 | c b8    | 38.2  | 113.2 |
| 997  | IPI00128370.3 | PGGLLLGDEAPNFEANTTIGR     | 1072.0470 | 2 | 77 | y7      | 5.85  | 82.9  |
| 998  | IPI00128370.3 | VVDSLQLTGTKPVATPVDWK      | 718.7687  | 3 | 24 | b7      | 14.55 | 38.6  |
| 999  | IPI00128370.3 | VVDSLQLTGTKPVATPVDWK      | 719.0818  | 3 | 27 |         | 0     | 27.0  |
| 1000 | IPI00128370.3 | VVDSLQLTGTKPVATPVDWK      | 1078.0965 | 2 | 79 | P y5    | 32.3  | 111.3 |
| 1001 | IPI00128370.3 | VVDSLQLTGTKPVATPVDWKK     | 571.3247  | 4 | 16 | P y6    | 32.3  | 48.3  |
| 1002 | IPI00128370.3 | VVDSLQLTGTKPVATPVDWKK     | 761.7650  | 3 | 16 | P y6    | 38.2  | 54.2  |
| 1003 | IPI00128370.3 | VVDSLQLTGTKPVATPVDWKK     | 761.7902  | 3 | 48 | y++15   | 4.6   | 52.6  |
| 1004 | IPI00128370.3 | VVFIFGPKD                 | 511.2899  | 2 | 49 | y4      | 44.5  | 93.5  |
| 1005 | IPI00128370.3 | VVFIFGPKDK                | 383.8936  | 3 | 35 | y6      | 20.55 | 55.6  |
| 1006 | IPI00230002.3 | AAVPSIK                   | 343.2159  | 2 | 29 | P y4    | 44.5  | 73.5  |
| 1007 | IPI00230002.3 | AGGFLMK                   | 362.1969  | 2 | 36 | y6      | 69.75 | 105.8 |
| 1008 | IPI00230002.3 | AGGFLMCK                  | 426.2447  | 2 | 27 | y4      | 44.5  | 71.5  |
| 1009 | IPI00230002.3 | AHSSMVG VNL P Q K         | 456.5748  | 3 | 30 | y5      | 14.55 | 44.6  |
| 1010 | IPI00230002.3 | AHSSMVG VNL P Q K         | 684.3602  | 2 | 37 |         | 0     | 37.0  |
| 1011 | IPI00230002.3 | ALESERPFLAILGGAK          | 590.3363  | 3 | 26 |         | 0     | 26.0  |
| 1012 | IPI00230002.3 | ALESERPFLAILGGAK          | 590.3362  | 3 | 34 | y7      | 31.95 | 66.0  |
| 1013 | IPI00230002.3 | ALESERPFLAILGGAK          | 885.1211  | 2 | 42 | P y10   | 50.5  | 92.5  |
| 1014 | IPI00230002.3 | CVGPEVENACANPAAGTVILLENLR | 889.7688  | 3 | 34 | y4      | 27.2  | 61.2  |
| 1015 | IPI00230002.3 | CVGPEVENACANPAAGTVILLENLR | 889.7690  | 3 | 37 | y7      | 13.65 | 50.7  |
| 1016 | IPI00230002.3 | ELNYFAK                   | 442.7298  | 2 | 19 |         | 0     | 19.0  |
| 1017 | IPI00230002.3 | IDAFR                     | 311.1713  | 2 | 23 |         | 0     | 23.0  |
| 1018 | IPI00230002.3 | IQLINMLDK                 | 601.3362  | 2 | 51 | y7      | 95.65 | 146.7 |
| 1019 | IPI00230002.3 | ITLPVDFVTADK              | 659.8684  | 2 | 47 | P y9    | 135.2 | 182.2 |
| 1020 | IPI00230002.3 | ITLPVDFVTADKFDENAK        | 675.0349  | 3 | 40 |         | 0     | 40.0  |
| 1021 | IPI00230002.3 | ITLPVDFVTADKFDENAK        | 1012.5260 | 2 | 48 |         | 0     | 48.0  |
| 1022 | IPI00230002.3 | KYAEAVGR                  | 447.2455  | 2 | 36 | y6      | 44.3  | 80.3  |

|      |               |                         |           |   |     |      |        |       |
|------|---------------|-------------------------|-----------|---|-----|------|--------|-------|
| 1023 | IPI00230002.3 | LGDVYVNDAFGTAHR         | 545.6031  | 3 | 39  | y6   | 1.25   | 40.3  |
| 1024 | IPI00230002.3 | LGDVYVNDAFGTAHR         | 545.9370  | 3 | 50  | y++9 | 52.95  | 103.0 |
| 1025 | IPI00230002.3 | LGDVYVNDAFGTAHR         | 817.9270  | 2 | 109 | y7   | 23.75  | 132.8 |
| 1026 | IPI00230002.3 | QIVWNGPVGVFWEAFAR       | 1053.5377 | 2 | 51  | y7   | 32.3   | 83.3  |
| 1027 | IPI00230002.3 | QIVWNGPVGVFWEAFAR       | 1053.5379 | 2 | 65  | y6   | 22.4   | 87.4  |
| 1028 | IPI00230002.3 | QIVWNGPVGVFWEAFAR       | 1053.5382 | 2 | 82  | y5   | 8.5    | 90.5  |
| 1029 | IPI00230002.3 | SVVLMShLGRPDGVPMPDK     | 679.0252  | 3 | 24  | b6   | 1.6    | 25.6  |
| 1030 | IPI00230002.3 | VLNNMEIGTSLYDEEGAK      | 992.4723  | 2 | 48  |      | 0      | 48.0  |
| 1031 | IPI00230002.3 | VLNNMEIGTSLYDEEGAK      | 991.9718  | 2 | 60  | y7   | 65.15  | 125.2 |
| 1032 | IPI00230002.3 | VLPGVDALSNV             | 1083.6041 | 1 | 24  | P y9 | 52.75  | 76.8  |
| 1033 | IPI00230002.3 | VLPGVDALSNV             | 542.3065  | 2 | 42  | y6   | 52.95  | 95.0  |
| 1034 | IPI00230002.3 | VSHVSTGGGASLELLEGGK     | 580.9769  | 3 | 25  |      | 0      | 25.0  |
| 1035 | IPI00230002.3 | WNTEDK                  | 396.6798  | 2 | 17  |      | 0      | 17.0  |
| 1036 | IPI00230002.3 | YSLEPVAANELK            | 610.3326  | 2 | 26  | P y7 | 61.35  | 87.4  |
| 1037 | IPI00135231.1 | DAAEAIKK                | 423.2404  | 2 | 47  | y5   | 57.05  | 104.1 |
| 1038 | IPI00135231.1 | DIFQEYDK                | 585.7935  | 2 | 30  | y7   | 125.8  | 155.8 |
| 1039 | IPI00135231.1 | GLPNVQR                 | 392.2270  | 2 | 24  | P y5 | 52.95  | 77.0  |
| 1040 | IPI00135231.1 | GQETSTNPIASIFAWSR       | 932.9641  | 2 | 63  | y5   | 15.6   | 78.6  |
| 1041 | IPI00135231.1 | GQETSTNPIASIFAWSR       | 933.4651  | 2 | 78  | y7   | 1.6    | 79.6  |
| 1042 | IPI00135231.1 | GQETSTNPIASIFAWSR       | 932.9644  | 2 | 97  | y7   | 33.75  | 130.8 |
| 1043 | IPI00135231.1 | GWPLYLSTK               | 532.7928  | 2 | 42  | P y7 | 102.45 | 144.5 |
| 1044 | IPI00135231.1 | IIWELIK                 | 457.7890  | 2 | 33  | y5   | 69.75  | 102.8 |
| 1045 | IPI00135231.1 | IQGGSVVEMQGDDEMTR       | 868.9386  | 2 | 106 | y6   | 14.55  | 120.6 |
| 1046 | IPI00135231.1 | LDNNTLSFFAK             | 699.8492  | 2 | 66  | y5   | 52.95  | 119.0 |
| 1047 | IPI00135231.1 | LGENLK                  | 337.1974  | 2 | 38  | y4   | 62.3   | 100.3 |
| 1048 | IPI00135231.1 | LIDDMVAQAMK             | 617.8214  | 2 | 66  | y6   | 69.75  | 135.8 |
| 1049 | IPI00135231.1 | LVTGWVKPIIIGR           | 484.6419  | 3 | 33  | P y6 | 23.75  | 56.8  |
| 1050 | IPI00135231.1 | LVTGWVKPIIIGR           | 726.4588  | 2 | 63  | P y6 | 49.6   | 112.6 |
| 1051 | IPI00135231.1 | NILGGTVFR               | 488.7825  | 2 | 42  | y7   | 23.75  | 65.8  |
| 1052 | IPI00135231.1 | SIEDFAHSSFQM            | 699.8045  | 2 | 29  |      | 0      | 29.0  |
| 1053 | IPI00135231.1 | SIEDFAHSSFQMALSK        | 599.9639  | 3 | 34  | y5   | 25.35  | 59.4  |
| 1054 | IPI00135231.1 | SIEDFAHSSFQMALSK        | 899.4305  | 2 | 44  | y9   | 38.5   | 82.5  |
| 1055 | IPI00135231.1 | SIEDFAHSSFQMALSK        | 899.4304  | 2 | 46  | y9   | 10.5   | 56.5  |
| 1056 | IPI00135231.1 | TVEAEAAHGTVTR           | 447.8970  | 3 | 20  |      | 0      | 20.0  |
| 1057 | IPI00135231.1 | TVEAEAAHGTVTR           | 671.3421  | 2 | 68  | y5   | 16.9   | 84.9  |
| 1058 | IPI00135231.1 | VEITYTPK                | 475.7633  | 2 | 43  | y6   | 52.95  | 96.0  |
| 1059 | IPI00135231.1 | VTYMVHDFEEGGGVAMGMYNQDK | 860.3737  | 3 | 17  | y5   | 62.3   | 79.3  |
| 1060 | IPI00338039.1 | AILVDLEPGTMDSVR         | 808.4212  | 2 | 57  | P y8 | 42.15  | 99.2  |
| 1061 | IPI00310035.3 | ASLQNLLSASQAR           | 679.8841  | 2 | 60  | y6   | 14.55  | 74.6  |
| 1062 | IPI00310035.3 | ASLQNLLSASQAR           | 679.8730  | 2 | 63  | y6   | 14.55  | 77.6  |
| 1063 | IPI00310035.3 | ASSIVVSGTPIR            | 593.8442  | 2 | 53  | y5   | 38.2   | 91.2  |

|      |               |                                 |           |   |    |         |       |       |
|------|---------------|---------------------------------|-----------|---|----|---------|-------|-------|
| 1064 | IPI00310035.3 | DIQQWEYVPLGPFLGK                | 945.9953  | 2 | 34 | P y8    | 44.3  | 78.3  |
| 1065 | IPI00310035.3 | DIQQWEYVPLGPFLGK                | 945.9955  | 2 | 41 | P y8    | 44.3  | 85.3  |
| 1066 | IPI00310035.3 | DIQQWEYVPLGPFLGK                | 945.9952  | 2 | 44 | P y8    | 31.95 | 76.0  |
| 1067 | IPI00310035.3 | FGPEPIPISK                      | 494.2787  | 2 | 30 | P y4    | 44.5  | 74.5  |
| 1068 | IPI00310035.3 | HLFTGPALSK                      | 535.8037  | 2 | 38 | y8      | 11.55 | 49.6  |
| 1069 | IPI00310035.3 | HQHVFDETTLNNFMGLGQAAWK          | 637.0576  | 4 | 15 | y6      | 62.3  | 77.3  |
| 1070 | IPI00310035.3 | HQHVFDETTLNNFMGLGQAAWK          | 636.8237  | 4 | 22 | y6      | 27.2  | 49.2  |
| 1071 | IPI00310035.3 | HQHVFDETTLNNFMGLGQAAWK          | 849.0749  | 3 | 54 |         | 0     | 54.0  |
| 1072 | IPI00310035.3 | HQHVFDETTLNNFMGLGQAAWK          | 849.0749  | 3 | 62 | y6      | 25.35 | 87.4  |
| 1073 | IPI00310035.3 | IGVAIGDQILDLSVIK                | 828.0704  | 2 | 71 | y6      | 77.6  | 148.6 |
| 1074 | IPI00310035.3 | IGVAIGDQILDLSVIK                | 827.5680  | 2 | 84 | y6      | 49.6  | 133.6 |
| 1075 | IPI00310035.3 | SFGTTISPWVVPMDALMPFVVPNPK       | 911.1390  | 3 | 25 | P y8    | 90.2  | 115.2 |
| 1076 | IPI00310035.3 | SFIPVAEDSDFPIQNLPGYGVFSTQSNPK   | 1047.5192 | 3 | 26 | P y++12 | 35.45 | 61.5  |
| 1077 | IPI00310035.3 | SFIPVAEDSDFPIQNLPGYGVFSTQSNPK   | 1047.8524 | 3 | 36 | y++15   | 4.5   | 40.5  |
| 1078 | IPI00310035.3 | SFIPVAEDSDFPIQNLPGYGVFSTQSNPKPR | 1131.8264 | 3 | 59 |         | 0     | 59.0  |
| 1079 | IPI00310035.3 | SFIPVAEDSDFPIQNLPGYGVFSTQSNPKPR | 1132.2366 | 3 | 65 |         | 0     | 65.0  |
| 1080 | IPI00355888.2 | DATNVGDEGGFAPNILENK             | 654.6476  | 3 | 35 | P y7    | 61.35 | 96.4  |
| 1081 | IPI00355888.2 | DATNVGDEGGFAPNILENK             | 981.4667  | 2 | 55 | P y7    | 22.4  | 77.4  |
| 1082 | IPI00355888.2 | HIADLAGNPEVILPVPFNVINGGSHAGNK   | 756.8999  | 4 | 30 | b8 P    | 1.75  | 31.8  |
| 1083 | IPI00355888.2 | HIADLAGNPEVILPVPFNVINGGSHAGNK   | 1008.1987 | 3 | 67 | b8 P    | 20.1  | 87.1  |
| 1084 | IPI00355888.2 | IGAEVYHNLK                      | 381.8767  | 3 | 33 |         | 0     | 33.0  |
| 1085 | IPI00355888.2 | IGAEVYHNLK                      | 572.3113  | 2 | 45 | y6      | 46.75 | 91.8  |
| 1086 | IPI00355888.2 | KVNVVEQEK                       | 358.2048  | 3 | 28 | c b4    | 57.05 | 85.1  |
| 1087 | IPI00355888.2 | KVNVVEQEK                       | 536.8040  | 2 | 42 | y7      | 95.65 | 137.7 |
| 1088 | IPI00355888.2 | LAMQEFMILPVGASSFR               | 632.9987  | 3 | 24 | P y8    | 20.1  | 44.1  |
| 1089 | IPI00355888.2 | LAMQEFMILPVGASSFR               | 949.4929  | 2 | 66 | P y8    | 30.4  | 96.4  |
| 1090 | IPI00355888.2 | LAQSNGWGVMVSHR                  | 514.5930  | 3 | 32 |         | 0     | 32.0  |
| 1091 | IPI00355888.2 | LAQSNGWGVMVSHR                  | 771.8970  | 2 | 89 | y7      | 12.85 | 101.9 |
| 1092 | IPI00355888.2 | LMIEMDG TENK                    | 640.7968  | 2 | 41 | y8      | 61.35 | 102.4 |
| 1093 | IPI00355888.2 | LMIEMDG TENK                    | 640.7988  | 2 | 45 | y8      | 73.4  | 118.4 |
| 1094 | IPI00355888.2 | SFVQNYPVVSIEDPFDDWGAWQK         | 991.1218  | 3 | 45 |         | 0     | 45.0  |
| 1095 | IPI00355888.2 | SFVQNYPVVSIEDPFDDWGAWQK         | 991.1253  | 3 | 49 |         | 0     | 49.0  |
| 1096 | IPI00355888.2 | SPDDPSRYITPDQLADLYK             | 732.3610  | 3 | 21 | b4 P    | 44.5  | 65.5  |
| 1097 | IPI00355888.2 | SPDDPSRYITPDQLADLYK             | 732.3609  | 3 | 21 |         | 0     | 21.0  |
| 1098 | IPI00355888.2 | VNVVEQEK                        | 472.7559  | 2 | 29 | y5      | 15.6  | 44.6  |
| 1099 | IPI00355888.2 | YITPDQLADLYK                    | 720.3744  | 2 | 30 |         | 0     | 30.0  |
| 1100 | IPI00321617.1 | AKPNEVVFLDDFGSNLKPAP            | 555.3022  | 4 | 16 | y++14   | 19.15 | 35.2  |
| 1101 | IPI00321617.1 | AKPNEVVFLDDFGSNLKPAP            | 555.0467  | 4 | 16 | y++9    | 23.75 | 39.8  |
| 1102 | IPI00321617.1 | AKPNEVVFLDDFGSNLKPAP            | 740.0608  | 3 | 34 |         | 0     | 34.0  |
| 1103 | IPI00321617.1 | ASDETGFI AVHK                   | 637.8227  | 2 | 59 | y++10   | 49.6  | 108.6 |
| 1104 | IPI00321617.1 | ATEIGGILVNTPEDPNLSK             | 984.5164  | 2 | 54 | P y5    | 52.95 | 107.0 |

|      |               |                       |           |   |    |        |       |       |
|------|---------------|-----------------------|-----------|---|----|--------|-------|-------|
| 1105 | IPI00321617.1 | ATEIGGILVNTPEDPNLSK   | 985.0207  | 2 | 57 | c b10  | 27.7  | 84.7  |
| 1106 | IPI00321617.1 | AVASLNTPFMPPDPDVSPMK  | 1058.0221 | 2 | 30 |        | 0     | 30.0  |
| 1107 | IPI00321617.1 | AVASLNTPFMPPDPDVSPMK  | 1058.0218 | 2 | 41 |        | 0     | 41.0  |
| 1108 | IPI00321617.1 | AVASLNTPFMPPDPDVSPMK  | 1058.0218 | 2 | 43 |        | 0     | 43.0  |
| 1109 | IPI00321617.1 | AVASLNTPFMPPDPDVSPMK  | 1058.0225 | 2 | 60 |        | 0     | 60.0  |
| 1110 | IPI00321617.1 | DFLLGAYQTEFPEGTEQLMK  | 805.7255  | 3 | 28 |        | 0     | 28.0  |
| 1111 | IPI00321617.1 | DFLLGAYQTEFPEGTEQLMK  | 805.7254  | 3 | 32 | y++15  | 21.9  | 53.9  |
| 1112 | IPI00321617.1 | DFLLGAYQTEFPEGTEQLMK  | 1208.0812 | 2 | 47 | c b7   | 5.55  | 52.6  |
| 1113 | IPI00321617.1 | DIVLRPEMSK            | 594.3274  | 2 | 29 | c b7   | 23.75 | 52.8  |
| 1114 | IPI00321617.1 | DMGMVT                | 335.2020  | 2 | 18 | y5     | 7.1   | 25.1  |
| 1115 | IPI00321617.1 | DMGMVTILVHNTASALR     | 610.3329  | 3 | 31 | b4     | 32.3  | 63.3  |
| 1116 | IPI00321617.1 | DMGMVTILVHNTASALR     | 915.4749  | 2 | 58 | y8     | 55.3  | 113.3 |
| 1117 | IPI00321617.1 | DMGMVTILVHNTASALRELEK | 777.0864  | 3 | 26 | y++16  | 41.85 | 67.9  |
| 1118 | IPI00321617.1 | DMGMVTILVHNTASALRELEK | 776.7573  | 3 | 34 |        | 0     | 34.0  |
| 1119 | IPI00321617.1 | EMVTFLDK              | 491.7498  | 2 | 48 | y4     | 29.45 | 77.5  |
| 1120 | IPI00321617.1 | ILVPALMVTAEK          | 642.8833  | 2 | 42 | P y9   | 66.55 | 108.6 |
| 1121 | IPI00321617.1 | ILVPALMVTAEK          | 642.8833  | 2 | 50 | P y9   | 98    | 148.0 |
| 1122 | IPI00321617.1 | ITFSQWVPLMDESYRK      | 667.3362  | 3 | 20 |        | 0     | 20.0  |
| 1123 | IPI00321617.1 | ITFSQWVPLMDESYRK      | 667.6708  | 3 | 22 |        | 0     | 22.0  |
| 1124 | IPI00321617.1 | ITFSQWVPLMDESYRK      | 667.6708  | 3 | 28 | y++13  | 61.2  | 89.2  |
| 1125 | IPI00321617.1 | ITFSQWVPLMDESYRK      | 1001.0012 | 2 | 35 | y5     | 49.1  | 84.1  |
| 1126 | IPI00321617.1 | ITFSQWVPLMDESYRK      | 1001.0055 | 2 | 38 |        | 0     | 38.0  |
| 1127 | IPI00321617.1 | SEEALALPR             | 493.2696  | 2 | 34 | c b6   | 14.55 | 48.6  |
| 1128 | IPI00321617.1 | TGFRGPLNWYR           | 456.2388  | 3 | 21 | y++9   | 22.4  | 43.4  |
| 1129 | IPI00321617.1 | VLAIDMK               | 395.2311  | 2 | 34 | y5     | 57.05 | 91.1  |
| 1130 | IPI00321617.1 | WLQTEVQNPSVTSK        | 808.9319  | 2 | 72 | P y6   | 52.95 | 125.0 |
| 1131 | IPI00321617.1 | WLQTEVQNPSVTSKI       | 865.9613  | 2 | 68 | y4     | 27.2  | 95.2  |
| 1132 | IPI00321617.1 | YQIPALAQAGFR          | 667.8650  | 2 | 36 | P y9   | 110.5 | 146.5 |
| 1133 | IPI00321617.1 | YQIPALAQAGFR          | 667.8733  | 2 | 41 | P y9   | 38.5  | 79.5  |
| 1134 | IPI00229080.4 | ADHGEPGR              | 476.2364  | 2 | 36 | P y4   | 27.2  | 63.2  |
| 1135 | IPI00229080.4 | ADLNNLGTIAK           | 621.8572  | 2 | 53 | y9     | 19.15 | 72.2  |
| 1136 | IPI00229080.4 | ALLFIPR               | 415.2683  | 2 | 24 | y4     | 41    | 65.0  |
| 1137 | IPI00229080.4 | DNSTMGYMMAK           | 624.7589  | 2 | 53 | y6     | 29.45 | 82.5  |
| 1138 | IPI00229080.4 | EDQTEYLEER            | 656.2916  | 2 | 36 | y5     | 25.35 | 61.4  |
| 1139 | IPI00229080.4 | ELISNASDALDK          | 638.8276  | 2 | 51 | y9     | 58.1  | 109.1 |
| 1140 | IPI00229080.4 | EQVANSAFVER           | 625.3132  | 2 | 57 | y6     | 14.55 | 71.6  |
| 1141 | IPI00229080.4 | GEPGXGTKVILHLK        | 809.4085  | 2 | 17 |        | 0     | 17.0  |
| 1142 | IPI00229080.4 | GVVDSIDLPLNISR        | 757.3965  | 2 | 28 | P y6   | 35.8  | 63.8  |
| 1143 | IPI00229080.4 | GVVDSIDLPLNISR        | 757.8977  | 2 | 59 | P y6   | 49.6  | 108.6 |
| 1144 | IPI00229080.4 | HLEINPDHPIVETLR       | 892.4777  | 2 | 44 | P y7   | 82.65 | 126.7 |
| 1145 | IPI00229080.4 | HSQFIGYPITLYLEK       | 603.6653  | 3 | 16 | c b7 P | 13.65 | 29.7  |

|      |               |                        |          |   |    |         |       |       |
|------|---------------|------------------------|----------|---|----|---------|-------|-------|
| 1146 | IPI00229080.4 | HSQFIGYPITLYLEK        | 603.9887 | 3 | 19 | P y8    | 58.1  | 77.1  |
| 1147 | IPI00229080.4 | HSQFIGYPITLYLEK        | 604.0035 | 3 | 34 | P y8    | 58.1  | 92.1  |
| 1148 | IPI00229080.4 | HSQFIGYPITLYLEK        | 905.4850 | 2 | 46 | P y8    | 31.95 | 78.0  |
| 1149 | IPI00229080.4 | HSQFIGYPITLYLEK        | 904.9797 | 2 | 47 | c b7 P  | 6.6   | 53.6  |
| 1150 | IPI00229080.4 | HSQFIGYPITLYLEK        | 905.4852 | 2 | 50 | P y8    | 61.35 | 111.4 |
| 1151 | IPI00229080.4 | IDIIPNPQER             | 597.8320 | 2 | 40 | P y6    | 25.35 | 65.4  |
| 1152 | IPI00229080.4 | IRYESLTDPSK            | 654.8429 | 2 | 22 | c b8 P  | 31.95 | 54.0  |
| 1153 | IPI00229080.4 | IRYESLTDPSKLDSGK       | 603.6521 | 3 | 16 | c b8 P  | 31.95 | 48.0  |
| 1154 | IPI00229080.4 | LGIHEDSTNR             | 381.1914 | 3 | 23 | y5      | 9.55  | 32.6  |
| 1155 | IPI00229080.4 | LGIHEDSTNR             | 571.2835 | 2 | 39 | y6      | 22.4  | 61.4  |
| 1156 | IPI00229080.4 | SIYYITGESK             | 580.7953 | 2 | 31 | y8      | 81.65 | 112.7 |
| 1157 | IPI00229080.4 | SLTNDWEDHLAVK          | 764.3903 | 2 | 67 | y++10   | 14.55 | 81.6  |
| 1158 | IPI00229080.4 | SLVSVTK                | 367.2262 | 2 | 26 | y5      | 57.05 | 83.1  |
| 1159 | IPI00229080.4 | SLVSVTK                | 733.4473 | 1 | 28 |         | 0     | 28.0  |
| 1160 | IPI00229080.4 | TKPIWTRNPDDITQEEYGEFYK | 683.5813 | 4 | 18 | y6      | 38.2  | 56.2  |
| 1161 | IPI00229080.4 | TKPIWTRNPDDITQEEYGEFYK | 911.1081 | 3 | 38 |         | 0     | 38.0  |
| 1162 | IPI00229080.4 | VILHLK                 | 361.7500 | 2 | 31 | y4      | 44.5  | 75.5  |
| 1163 | IPI00229080.4 | VVVITK                 | 329.7285 | 2 | 24 | y5      | 44.5  | 68.5  |
| 1164 | IPI00229080.4 | YIDQEELNK              | 576.2834 | 2 | 38 | y7      | 77.6  | 115.6 |
| 1165 | IPI00131695.3 | ALVSSVR                | 731.4420 | 1 | 19 |         | 0     | 19.0  |
| 1166 | IPI00131695.3 | ALVSSVR                | 366.2241 | 2 | 37 | y5      | 65.15 | 102.2 |
| 1167 | IPI00131695.3 | APQVSTPTLVEAAR         | 480.6004 | 3 | 34 | y4      | 44.5  | 78.5  |
| 1168 | IPI00131695.3 | APQVSTPTLVEAAR         | 720.4088 | 2 | 40 | P y8    | 21.2  | 61.2  |
| 1169 | IPI00131695.3 | APQVSTPTLVEAAR         | 720.3994 | 2 | 40 | P y8    | 58.1  | 98.1  |
| 1170 | IPI00131695.3 | AWAVAR                 | 337.1925 | 2 | 26 | y4      | 44.5  | 70.5  |
| 1171 | IPI00131695.3 | DVFLGTFLYEYSR          | 805.4067 | 2 | 44 | y6      | 7.1   | 51.1  |
| 1172 | IPI00131695.3 | DVFLGTFLYEYSR          | 805.3989 | 2 | 62 |         | 0     | 62.0  |
| 1173 | IPI00131695.3 | ENPTTFMGHYLHEVAR       | 634.6466 | 3 | 21 | y++9    | 77.6  | 98.6  |
| 1174 | IPI00131695.3 | ENPTTFMGHYLHEVAR       | 634.6465 | 3 | 23 | P y++14 | 38.5  | 61.5  |
| 1175 | IPI00131695.3 | ENPTTFMGHYLHEVAR       | 634.9834 | 3 | 24 | y5      | 49.6  | 73.6  |
| 1176 | IPI00131695.3 | ENPTTFMGHYLHEVAR       | 951.9530 | 2 | 51 | y7      | 52.95 | 104.0 |
| 1177 | IPI00131695.3 | GLVLIAFSQYLQK          | 740.4452 | 2 | 26 |         | 0     | 26.0  |
| 1178 | IPI00131695.3 | GLVLIAFSQYLQK          | 740.9341 | 2 | 32 |         | 0     | 32.0  |
| 1179 | IPI00131695.3 | GLVLIAFSQYLQK          | 740.9342 | 2 | 35 | y7      | 77.6  | 112.6 |
| 1180 | IPI00131695.3 | GLVLIAFSQYLQK          | 740.4452 | 2 | 37 | y7      | 49.6  | 86.6  |
| 1181 | IPI00131695.3 | GLVLIAFSQYLQK          | 740.9341 | 2 | 41 |         | 0     | 41.0  |
| 1182 | IPI00131695.3 | GLVLIAFSQYLQK          | 494.2918 | 3 | 43 | c b6    | 0.7   | 43.7  |
| 1183 | IPI00131695.3 | GLVLIAFSQYLQK          | 493.9574 | 3 | 49 | c b6    | 1.05  | 50.1  |
| 1184 | IPI00131695.3 | KQTALAELVK             | 550.8379 | 2 | 23 | y9      | 31.95 | 55.0  |
| 1185 | IPI00131695.3 | KQTALAELVK             | 367.5606 | 3 | 59 | c b4    | 9.55  | 68.6  |
| 1186 | IPI00131695.3 | KYEATLEK               | 491.2668 | 2 | 37 | y7      | 102.9 | 139.9 |

|      |               |                             |           |   |    |        |       |       |
|------|---------------|-----------------------------|-----------|---|----|--------|-------|-------|
| 1187 | IPI00131695.3 | LGEYGFQNAILVR               | 741.4136  | 2 | 30 | y7     | 23.75 | 53.8  |
| 1188 | IPI00131695.3 | LGEYGFQNAILVR               | 740.4259  | 2 | 44 | y7     | 33.75 | 77.8  |
| 1189 | IPI00131695.3 | LGEYGFQNAILVR               | 740.3997  | 2 | 58 | y7     | 31.95 | 90.0  |
| 1190 | IPI00131695.3 | LGEYGFQNAILVR               | 740.3998  | 2 | 64 | y6     | 38.2  | 102.2 |
| 1191 | IPI00131695.3 | LSQTFPNADFAEITK             | 841.4228  | 2 | 20 | c b5 P | 15.6  | 35.6  |
| 1192 | IPI00131695.3 | LSQTFPNADFAEITK             | 841.4436  | 2 | 26 | c b5 P | 16.9  | 42.9  |
| 1193 | IPI00131695.3 | LSQTFPNADFAEITK             | 841.4436  | 2 | 41 |        | 0     | 41.0  |
| 1194 | IPI00131695.3 | LVQEVTDFAK                  | 575.3114  | 2 | 39 | y8     | 44.3  | 83.3  |
| 1195 | IPI00131695.3 | LVQEVTDFAK                  | 575.3113  | 2 | 55 | y8     | 33.75 | 88.8  |
| 1196 | IPI00131695.3 | QTALAEVLK                   | 486.7901  | 2 | 54 | y5     | 69.75 | 123.8 |
| 1197 | IPI00131695.3 | RHPDYSVSLLLR                | 728.4241  | 2 | 31 | y8     | 21.2  | 52.2  |
| 1198 | IPI00131695.3 | RHPDYSVSLLLR                | 485.9404  | 3 | 50 | y5     | 57.05 | 107.1 |
| 1199 | IPI00131695.3 | RHPDYSVSLLLR                | 485.9404  | 3 | 58 | y5     | 69.75 | 127.8 |
| 1200 | IPI00131695.3 | SEIAHRYNDLGEQHFK            | 648.6508  | 3 | 30 | y6     | 25.35 | 55.4  |
| 1201 | IPI00131695.3 | SLHTLFGDK                   | 509.2724  | 2 | 31 | y6     | 89    | 120.0 |
| 1202 | IPI00131695.3 | SLHTLFGDK                   | 509.2724  | 2 | 38 | y7     | 61.35 | 99.4  |
| 1203 | IPI00131695.3 | TPVSEHVTK                   | 333.1821  | 3 | 22 | y6     | 29.45 | 51.5  |
| 1204 | IPI00131695.3 | TPVSEHVTK                   | 499.2691  | 2 | 48 | y6     | 49.6  | 97.6  |
| 1205 | IPI00131695.3 | YNDLGEQHFK                  | 417.5319  | 3 | 17 | y++8   | 41    | 58.0  |
| 1206 | IPI00131695.3 | YNDLGEQHFK                  | 625.7944  | 2 | 55 | y6     | 57.05 | 112.1 |
| 1207 | IPI00113325.1 | ASKPGLLASVA AVAAQK          | 527.9848  | 3 | 18 | y7     | 61.35 | 79.4  |
| 1208 | IPI00113325.1 | AVDEFNQQR                   | 553.7652  | 2 | 53 | y4     | 27.2  | 80.2  |
| 1209 | IPI00113325.1 | EDTNTITDLGILYGG             | 528.2588  | 3 | 16 | y++10  | 5.85  | 21.9  |
| 1210 | IPI00113325.1 | EFQPLDPTQELIFPPELMR         | 1151.0863 | 2 | 27 |        | 0     | 27.0  |
| 1211 | IPI00113325.1 | EFQPLDPTQELIFPPELMR         | 1151.0858 | 2 | 28 | P y6   | 75.6  | 103.6 |
| 1212 | IPI00113325.1 | EFQPLDPTQELIFPPELMR         | 1151.0917 | 2 | 29 | P y6   | 89    | 118.0 |
| 1213 | IPI00113325.1 | FSVGFPK                     | 391.2162  | 2 | 26 | y4     | 29.45 | 55.5  |
| 1214 | IPI00113325.1 | FTDVSYPPIISPAR              | 789.9617  | 2 | 40 | P y8   | 58.1  | 98.1  |
| 1215 | IPI00113325.1 | GLSPIWAINSPATAEVIR          | 948.5233  | 2 | 54 | c b7   | 57.05 | 111.1 |
| 1216 | IPI00113325.1 | GLSPIWAINSPATAEVIR          | 948.5235  | 2 | 67 | P y8   | 69.75 | 136.8 |
| 1217 | IPI00113325.1 | HPSAPLVIGNTYLGLHMK          | 650.3577  | 3 | 34 | y++11  | 1.75  | 35.8  |
| 1218 | IPI00113325.1 | IASVTDIPEEFHVSLLTPTPNPK     | 836.1121  | 3 | 16 | P y6   | 8.5   | 24.5  |
| 1219 | IPI00113325.1 | IASVTDIPEEFHVSLLTPTPNPK     | 836.1124  | 3 | 24 | P y6   | 25.35 | 49.4  |
| 1220 | IPI00113325.1 | IVYQDIEPMIVTVQDALQYESFIGPER | 1052.5315 | 3 | 25 | y5     | 16.9  | 41.9  |
| 1221 | IPI00113325.1 | IVYQDIEPMIVTVQDALQYESFIGPER | 1052.2014 | 3 | 47 | y6     | 5.85  | 52.9  |
| 1222 | IPI00113325.1 | MAEESQNTVLTFRGER            | 623.3081  | 3 | 18 |        | 0     | 18.0  |
| 1223 | IPI00113325.1 | MAEESQNTVLTFRGER            | 623.6401  | 3 | 23 |        | 0     | 23.0  |
| 1224 | IPI00113325.1 | MIQVASR                     | 402.7238  | 2 | 42 | y4     | 7.1   | 49.1  |
| 1225 | IPI00113325.1 | NADPEVNLLFYLRK              | 846.4613  | 2 | 35 | y4     | 16.9  | 51.9  |
| 1226 | IPI00113325.1 | NVASLGGHIISR                | 612.3460  | 2 | 65 | y7     | 82.65 | 147.7 |
| 1227 | IPI00113325.1 | PWSIPVA                     | 769.4250  | 1 | 41 | c b4 P | 29.45 | 70.5  |

|      |               |                                       |           |   |    |         |       |       |
|------|---------------|---------------------------------------|-----------|---|----|---------|-------|-------|
| 1228 | IPI00113325.1 | QNPSGTWEEWVK                          | 730.8560  | 2 | 31 | y6      | 25.35 | 56.4  |
| 1229 | IPI00113325.1 | QQNAFATVNAGMK                         | 690.3452  | 2 | 46 | y8      | 30.4  | 76.4  |
| 1230 | IPI00113325.1 | RDDMLITGGRHPLLK                       | 593.6610  | 3 | 28 | c b6    | 0.9   | 28.9  |
| 1231 | IPI00113325.1 | TRIHPVQER                             | 568.3207  | 2 | 27 | P y5    | 27.2  | 54.2  |
| 1232 | IPI00113325.1 | TTWIAPGTLNDLLELK                      | 892.9935  | 2 | 31 | c b5 P  | 8.5   | 39.5  |
| 1233 | IPI00113325.1 | TTWIAPGTLNDLLELK                      | 893.4924  | 2 | 44 | y++14   | 23.55 | 67.6  |
| 1234 | IPI00113325.1 | VRELNMYR                              | 360.8588  | 3 | 19 | c b5    | 41    | 60.0  |
| 1235 | IPI00113325.1 | VRELNMYR                              | 540.7844  | 2 | 36 | y6      | 25.35 | 61.4  |
| 1236 | IPI00113325.1 | WEFVSAFR                              | 521.2609  | 2 | 42 | y6      | 14.55 | 56.6  |
| 1237 | IPI00113325.1 | YSPEGVLYTR                            | 592.8014  | 2 | 51 | P y8    | 20.1  | 71.1  |
| 1238 | IPI00403810.1 | AVFVDLEPTVIDEVR                       | 851.4570  | 2 | 45 | y5      | 44.5  | 89.5  |
| 1239 | IPI00403810.1 | AVFVDLEPTVIDEVR                       | 851.4570  | 2 | 65 | P y8    | 55.3  | 120.3 |
| 1240 | IPI00403810.1 | DVNAAIATIK                            | 508.2926  | 2 | 57 | y8      | 55.3  | 112.3 |
| 1241 | IPI00403810.1 | EIIDLVLDR                             | 543.3137  | 2 | 65 |         | 0     | 65.0  |
| 1242 | IPI00403810.1 | IHFPLATYAPVISA EK                     | 878.9880  | 2 | 36 | y8      | 61.35 | 97.4  |
| 1243 | IPI00403810.1 | LDHKFDLMYAK                           | 460.9042  | 3 | 21 |         | 0     | 21.0  |
| 1244 | IPI00403810.1 | LDHKFDLMYAK                           | 690.8563  | 2 | 33 | y++9    | 52.95 | 86.0  |
| 1245 | IPI00403810.1 | LISQIVSSITASLR                        | 744.4433  | 2 | 65 | y8      | 11.55 | 76.6  |
| 1246 | IPI00403810.1 | LSVDYGKK                              | 455.2560  | 2 | 20 |         | 0     | 20.0  |
| 1247 | IPI00403810.1 | NLDIERPTYTNLNR                        | 859.9437  | 2 | 28 | P y8    | 31.95 | 60.0  |
| 1248 | IPI00403810.1 | QLFHPEQLITGK                          | 705.8918  | 2 | 16 | P y8    | 73.4  | 89.4  |
| 1249 | IPI00403810.1 | QLFHPEQLITGKEDAANNYAR                 | 806.0753  | 3 | 49 | y7      | 25.35 | 74.4  |
| 1250 | IPI00403810.1 | TIGGGDDSFNTFFSETGAGK                  | 1004.9546 | 2 | 55 | y7      | 30.4  | 85.4  |
| 1251 | IPI00403810.1 | TIGGGDDSFNTFFSETGAGK                  | 1004.9508 | 2 | 71 | y7      | 33.75 | 104.8 |
| 1252 | IPI00403810.1 | VGINYQPPTVVPGGDLAK                    | 913.4984  | 2 | 48 | P y7    | 22.4  | 70.4  |
| 1253 | IPI00230084.3 | AWN IWADIPAPK                         | 691.3745  | 2 | 72 | P y4    | 41    | 113.0 |
| 1254 | IPI00230084.3 | DYEETIGK                              | 477.7242  | 2 | 21 | y6      | 49.6  | 70.6  |
| 1255 | IPI00230084.3 | EVALMVQER                             | 537.7851  | 2 | 49 | y5      | 25.35 | 74.4  |
| 1256 | IPI00230084.3 | FQDEEEVFEWNNEVK                       | 971.9347  | 2 | 81 | y6      | 12.85 | 93.9  |
| 1257 | IPI00230084.3 | GAPTTSLVSVAVTK                        | 665.8874  | 2 | 67 | y6      | 49.6  | 116.6 |
| 1258 | IPI00230084.3 | LVSLEM GK                             | 438.7466  | 2 | 28 | y6      | 65.15 | 93.2  |
| 1259 | IPI00230084.3 | QGLSSSIFTK                            | 534.2900  | 2 | 37 | y5      | 44.5  | 81.5  |
| 1260 | IPI00230084.3 | STLLIHHPQYAWLQDLGLREDNEG VYNGSWGGR    | 957.2240  | 4 | 55 | y++18   | 8.35  | 63.4  |
| 1261 | IPI00230084.3 | STLLIHHPQYAWLQDLGLREDNEG VYNGSWGGR    | 957.2197  | 4 | 67 | y8      | 11.55 | 78.6  |
| 1262 | IPI00230084.3 | VGNP WDPN ILYGPLHTK                   | 641.3391  | 3 | 18 |         | 0     | 18.0  |
| 1263 | IPI00230084.3 | VGNP WDPN ILYGPLHTK                   | 641.0035  | 3 | 19 | P y++11 | 55.3  | 74.3  |
| 1264 | IPI00230084.3 | VGNP WDPN ILYGPLHTK                   | 641.3374  | 3 | 27 | y7      | 25.35 | 52.4  |
| 1265 | IPI00230084.3 | VMDHPGNYVEPTIVTGLAHDAPIVHQETFAPILYVFK | 1030.9869 | 4 | 32 |         | 0     | 32.0  |
| 1266 | IPI00230084.3 | VNLLSFTGSTQVGK                        | 725.8972  | 2 | 51 | y8      | 5.55  | 56.6  |
| 1267 | IPI00230084.3 | VNLLSFTGSTQVGK                        | 726.4011  | 2 | 57 | y7      | 22.4  | 79.4  |
| 1268 | IPI00127417.1 | ASEEHLK                               | 407.2087  | 2 | 45 | y5      | 52.95 | 98.0  |

|      |               |                               |           |   |    |        |       |       |
|------|---------------|-------------------------------|-----------|---|----|--------|-------|-------|
| 1269 | IPI00127417.1 | DRPFFPGLVK                    | 588.3327  | 2 | 22 | c b8   | 22.4  | 44.4  |
| 1270 | IPI00127417.1 | DRPFFPGLVK                    | 392.5571  | 3 | 22 | c b5 P | 25.35 | 47.4  |
| 1271 | IPI00127417.1 | VMLGETNPADSKPGTIR             | 595.9762  | 3 | 24 |        | 0     | 24.0  |
| 1272 | IPI00127417.1 | VMLGETNPADSKPGTIR             | 893.4624  | 2 | 69 | P y5   | 52.95 | 122.0 |
| 1273 | IPI00127417.1 | YMNSGPVVAMVWEGLNVVK           | 698.6912  | 3 | 42 |        | 0     | 42.0  |
| 1274 | IPI00127417.1 | YMNSGPVVAMVWEGLNVVK           | 698.3569  | 3 | 46 | y6     | 41    | 87.0  |
| 1275 | IPI00127417.1 | YMNSGPVVAMVWEGLNVVK           | 698.3569  | 3 | 51 | y6     | 27.2  | 78.2  |
| 1276 | IPI00127417.1 | YMNSGPVVAMVWEGLNVVK           | 1047.5341 | 2 | 57 | y8     | 30.4  | 87.4  |
| 1277 | IPI00127417.1 | YMNSGPVVAMVWEGLNVVK           | 1047.5342 | 2 | 75 | y8     | 28.95 | 104.0 |
| 1278 | IPI00127417.1 | YMNSGPVVAMVWEGLNVVK           | 1047.5343 | 2 | 76 | y8     | 28.95 | 105.0 |
| 1279 | IPI00127417.1 | YMNSGPVVAMVWEGLNVVK           | 1047.0305 | 2 | 85 | y8     | 12.15 | 97.2  |
| 1280 | IPI00122342.6 | AHVIVMAATNRPNSIDPALRR         | 768.1039  | 3 | 16 | y++18  | 4.3   | 20.3  |
| 1281 | IPI00122342.6 | AHVIVMAATNRPNSIDPALRR         | 768.4400  | 3 | 24 | b5     | 18.5  | 42.5  |
| 1282 | IPI00122342.6 | ASGADSKGDDLSTAILK             | 845.9282  | 2 | 66 | y7     | 33.75 | 99.8  |
| 1283 | IPI00122342.6 | ELQELVQYPVEHPDK               | 912.4628  | 2 | 62 | y8     | 58.1  | 120.1 |
| 1284 | IPI00122342.6 | ESIESEIRR                     | 559.7956  | 2 | 16 | c b8   | 1.95  | 18.0  |
| 1285 | IPI00122342.6 | GILLYGPPGTGK                  | 586.8374  | 2 | 33 | y7     | 33.75 | 66.8  |
| 1286 | IPI00122342.6 | IVSQLLTLMDGLK                 | 716.4195  | 2 | 70 | y7     | 33.75 | 103.8 |
| 1287 | IPI00122342.6 | KGDIFLVR                      | 474.2879  | 2 | 32 | y5     | 41    | 73.0  |
| 1288 | IPI00122342.6 | KYEMFAQTLQQSR                 | 543.9403  | 3 | 31 | y4     | 15.6  | 46.6  |
| 1289 | IPI00122342.6 | KYEMFAQTLQQSR                 | 815.4579  | 2 | 94 | y8     | 12.15 | 106.2 |
| 1290 | IPI00122342.6 | LAGESESNLRK                   | 602.3199  | 2 | 50 | y7     | 33.75 | 83.8  |
| 1291 | IPI00122342.6 | LDQLIYIPLPEK                  | 778.9314  | 2 | 42 | P y6   | 57.05 | 99.1  |
| 1292 | IPI00122342.6 | LIVDEAINEDNSVVSLSQPK          | 1086.0644 | 2 | 87 | y4     | 27.2  | 114.2 |
| 1293 | IPI00122342.6 | MDELQLFRGDTVLLK               | 593.6566  | 3 | 18 |        | 0     | 18.0  |
| 1294 | IPI00122342.6 | NAPAIIFIDELDAIAPK             | 906.0919  | 2 | 23 |        | 0     | 23.0  |
| 1295 | IPI00122342.6 | NVFIIGA                       | 367.7260  | 2 | 18 |        | 0     | 18.0  |
| 1296 | IPI00122342.6 | VINQILTEMDGMSTK               | 840.9244  | 2 | 52 | y9     | 30.4  | 82.4  |
| 1297 | IPI00122342.6 | WALSQSNPSALR                  | 665.3559  | 2 | 58 | y9     | 20.1  | 78.1  |
| 1298 | IPI00381603.1 | DATNVGDEGGFAPNILENK           | 980.9690  | 2 | 64 | c b5   | 8.5   | 72.5  |
| 1299 | IPI00381603.1 | GNPTVEVDLYTAK                 | 703.8658  | 2 | 40 | y8     | 58.1  | 98.1  |
| 1300 | IPI00381603.1 | GVSQAVEHINK                   | 591.3173  | 2 | 51 | y7     | 46.75 | 97.8  |
| 1301 | IPI00381603.1 | LAMQEFMILPVGASSFR             | 949.4931  | 2 | 59 | P y8   | 22.4  | 81.4  |
| 1302 | IPI00381603.1 | SGKYDLDFK                     | 536.7693  | 2 | 38 | c b7   | 49.6  | 87.6  |
| 1303 | IPI00381603.1 | TIAPALVSK                     | 450.2820  | 2 | 16 | y7     | 125.8 | 141.8 |
| 1304 | IPI00381603.1 | TIAPALVSK                     | 899.5834  | 1 | 17 | P y6   | 52.95 | 70.0  |
| 1305 | IPI00380348.1 | ADNFEYSDPVDGSISK              | 872.3913  | 2 | 60 | P y8   | 90.2  | 150.2 |
| 1306 | IPI00380348.1 | AIGGIILTASHNPPGGPNGDFGIK      | 736.3950  | 3 | 36 | P y8   | 46.75 | 82.8  |
| 1307 | IPI00380348.1 | DLEALMLDR                     | 538.2764  | 2 | 40 | y7     | 12.85 | 52.9  |
| 1308 | IPI00380348.1 | FNISNGGPAPEAITDK              | 815.9377  | 2 | 93 | P y7   | 58.1  | 151.1 |
| 1309 | IPI00380348.1 | HGFFVNPDSVAVIAANIFSIPYFQQTGVR | 1095.2306 | 3 | 17 | y6     | 1.4   | 18.4  |



|      |               |                                       |           |   |    |        |       |       |
|------|---------------|---------------------------------------|-----------|---|----|--------|-------|-------|
| 1310 | IPI00380348.1 | HGFFVNPSDSVAVIAANIFSIPYFQQTGVR        | 1095.2306 | 3 | 29 |        | 0     | 29.0  |
| 1311 | IPI00380348.1 | HGFFVNPSDSVAVIAANIFSIPYFQQTGVR        | 1094.8963 | 3 | 37 | y6     | 23.35 | 60.4  |
| 1312 | IPI00380348.1 | IALYETPTGWK                           | 639.8502  | 2 | 28 | y7     | 22.4  | 50.4  |
| 1313 | IPI00380348.1 | IFQISK                                | 368.2238  | 2 | 31 | y5     | 57.05 | 88.1  |
| 1314 | IPI00380348.1 | INQDPQVMLAPLISIALK                    | 655.7140  | 3 | 35 | P y8   | 44.3  | 79.3  |
| 1315 | IPI00380348.1 | INQDPQVMLAPLISIALK                    | 983.0677  | 2 | 40 | P y8   | 73.4  | 113.4 |
| 1316 | IPI00380348.1 | INQDPQVMLAPLISIALK                    | 655.7140  | 3 | 40 | y++9   | 27.2  | 67.2  |
| 1317 | IPI00380348.1 | INQDPQVMLAPLISIALK                    | 983.0674  | 2 | 60 | c b8   | 5.35  | 65.4  |
| 1318 | IPI00380348.1 | NIFDFNALK                             | 541.2878  | 2 | 32 | y7     | 46.75 | 78.8  |
| 1319 | IPI00380348.1 | QQFDLENK                              | 511.2508  | 2 | 28 | y6     | 33.75 | 61.8  |
| 1320 | IPI00380348.1 | QSVEDILK                              | 466.2589  | 2 | 24 |        | 0     | 24.0  |
| 1321 | IPI00380348.1 | SGEHDFGAAFDGGDRNMILGK                 | 770.6819  | 3 | 29 |        | 0     | 29.0  |
| 1322 | IPI00380348.1 | TQAYPDQKPGTSGLR                       | 540.2780  | 3 | 19 | c b4 P | 6.6   | 25.6  |
| 1323 | IPI00380348.1 | TQAYPDQKPGTSGLRK                      | 582.9759  | 3 | 24 | b4 P   | 27.2  | 51.2  |
| 1324 | IPI00380348.1 | VDLGVLGK                              | 400.7477  | 2 | 43 | y5     | 29.45 | 72.5  |
| 1325 | IPI00380348.1 | VFQSNANYAENFIQSIVSTVEPALRQEATLVVGGDGR | 996.2638  | 4 | 22 | y5     | 16.9  | 38.9  |
| 1326 | IPI00380348.1 | VFQSNANYAENFIQSIVSTVEPALRQEATLVVGGDGR | 995.9512  | 4 | 26 | y6     | 5.85  | 31.9  |
| 1327 | IPI00117352.1 | MAVTFIGNSTAIQELFK                     | 936.0963  | 2 | 52 | y5     | 14.55 | 66.6  |
| 1328 | IPI00117352.1 | NSSYFVEWIPNNVK                        | 849.0437  | 2 | 31 | P y5   | 62.3  | 93.3  |
| 1329 | IPI00129011.1 | AGEYEALPEK                            | 553.7713  | 2 | 50 | y4     | 62.3  | 112.3 |
| 1330 | IPI00129011.1 | DHLDSTMRR                             | 573.7899  | 2 | 15 | y5     | 7.7   | 22.7  |
| 1331 | IPI00129011.1 | DMTDDVFK                              | 485.7131  | 2 | 26 | y6     | 69.75 | 95.8  |
| 1332 | IPI00129011.1 | EAQELNLPVVGSQLVGLVPLK                 | 1102.6404 | 2 | 42 |        | 0     | 42.0  |
| 1333 | IPI00129011.1 | EAQELNLPVVGSQLVGLVPLK                 | 1102.6415 | 2 | 43 | c b7 P | 5.85  | 48.9  |
| 1334 | IPI00129011.1 | ERIIEYLPDSGPEQSLLDTSR                 | 877.4612  | 3 | 31 | y++16  | 77.95 | 109.0 |
| 1335 | IPI00129011.1 | ERIIEYLPDSGPEQSLLDTSR                 | 877.7929  | 3 | 41 | y++16  | 30.65 | 71.7  |
| 1336 | IPI00129011.1 | ERIIEYLPDSGPEQSLLDTSR                 | 877.7933  | 3 | 44 | y5     | 13.65 | 57.7  |
| 1337 | IPI00129011.1 | IALNLR                                | 350.2291  | 2 | 28 | y4     | 41    | 69.0  |
| 1338 | IPI00129011.1 | LGLDSLAPFDPK                          | 636.8478  | 2 | 61 | y6     | 38.2  | 99.2  |
| 1339 | IPI00129011.1 | LIPPFHAASAQLTSLVDADAR                 | 732.0615  | 3 | 17 | y6     | 23.75 | 40.8  |
| 1340 | IPI00129011.1 | NLAQVSTNLLDFEVTALHTVFEEARR            | 992.1826  | 3 | 46 |        | 0     | 46.0  |
| 1341 | IPI00129011.1 | SAAPGGGSVAAAVAALGAALASMVGQMTYGR       | 922.1345  | 3 | 41 |        | 0     | 41.0  |
| 1342 | IPI00129011.1 | SAAPGGGSVAAAVAALGAALASMVGQMTYGR       | 922.1342  | 3 | 53 | y6     | 1.25  | 54.3  |
| 1343 | IPI00129011.1 | SAAPGGGSVAAAVAALGAALASMVGQMTYGRR      | 974.1724  | 3 | 25 |        | 0     | 25.0  |
| 1344 | IPI00129011.1 | SAAPGGGSVAAAVAALGAALASMVGQMTYGRR      | 974.1726  | 3 | 29 |        | 0     | 29.0  |
| 1345 | IPI00129011.1 | TASQLIDMSK                            | 547.2821  | 2 | 61 | y8     | 73.4  | 134.4 |
| 1346 | IPI00129011.1 | TQAALVLSLEAR                          | 664.8925  | 2 | 86 | y6     | 14.55 | 100.6 |
| 1347 | IPI00267407.1 | AGVPPGVINIVFGTGPR                     | 550.9926  | 3 | 21 | y5     | 38.2  | 59.2  |
| 1348 | IPI00267407.1 | AGVPPGVINIVFGTGPR                     | 551.3218  | 3 | 33 | y5     | 14.55 | 47.6  |
| 1349 | IPI00267407.1 | AGVPPGVINIVFGTGPR                     | 826.0650  | 2 | 43 | c b7   | 15.6  | 58.6  |
| 1350 | IPI00267407.1 | DSYDFFTEIK                            | 632.7905  | 2 | 20 | y7     | 49.6  | 69.6  |

|      |               |                                 |           |   |     |        |       |       |
|------|---------------|---------------------------------|-----------|---|-----|--------|-------|-------|
| 1351 | IPI00267407.1 | DSYDFFTEIK                      | 632.7905  | 2 | 37  | y7     | 35.8  | 72.8  |
| 1352 | IPI00267407.1 | ELLMLENFIGGK                    | 682.3707  | 2 | 64  | y7     | 46.75 | 110.8 |
| 1353 | IPI00267407.1 | ELNLPFGGMK                      | 553.2886  | 2 | 34  | P y6   | 95.65 | 129.7 |
| 1354 | IPI00267407.1 | IAPAIAGNTVIAK                   | 655.3984  | 2 | 55  | y7     | 35.8  | 90.8  |
| 1355 | IPI00267407.1 | KRFVEATR                        | 503.7934  | 2 | 23  |        | 0     | 23.0  |
| 1356 | IPI00267407.1 | LADVLEQSLEELAQAESK              | 987.0069  | 2 | 63  | y6     | 65.15 | 128.2 |
| 1357 | IPI00267407.1 | LADVLEQSLEELAQAESK              | 987.0067  | 2 | 105 | y4     | 15.6  | 120.6 |
| 1358 | IPI00267407.1 | SLVLNR                          | 351.2187  | 2 | 20  | y4     | 16.9  | 36.9  |
| 1359 | IPI00267407.1 | TPVGIAGLISPWNLPYLLTWK           | 818.1621  | 3 | 26  |        | 0     | 26.0  |
| 1360 | IPI00267407.1 | VGEALVSHPEVPLISFTGSQPTAER       | 874.7914  | 3 | 24  | y8     | 5.15  | 29.2  |
| 1361 | IPI00267407.1 | VGEALVSHPEVPLISFTGSQPTAER       | 874.7918  | 3 | 26  | P y5   | 38.2  | 64.2  |
| 1362 | IPI00267407.1 | VGVPSPSANMGALISK                | 821.9268  | 2 | 32  | y6     | 29.45 | 61.5  |
| 1363 | IPI00267407.1 | VGVPSPSANMGALISK                | 821.9268  | 2 | 56  | c b6 P | 27.2  | 83.2  |
| 1364 | IPI00267407.1 | VPNSGKEEIEAAVEAAR               | 590.6399  | 3 | 34  | y4     | 15.6  | 49.6  |
| 1365 | IPI00267407.1 | YGLAATVWSK                      | 548.2951  | 2 | 57  | y7     | 46.75 | 103.8 |
| 1366 | IPI00404116.1 | FNLGLDFPNLPYLIDGSHK             | 721.0447  | 3 | 27  |        | 0     | 27.0  |
| 1367 | IPI00404116.1 | GLTHSIR                         | 392.2270  | 2 | 23  | y5     | 25.35 | 48.4  |
| 1368 | IPI00404116.1 | PMTLGYWNTR                      | 619.8030  | 2 | 43  | y6     | 1.4   | 44.4  |
| 1369 | IPI00404116.1 | VTYVDFLAYDILDQYR                | 997.9991  | 2 | 26  | y7     | 35.8  | 61.8  |
| 1370 | IPI00134475.2 | AMGAAQVVVTDLSASR                | 525.9443  | 3 | 63  | y4     | 27.2  | 90.2  |
| 1371 | IPI00134475.2 | AMGAAQVVVTDLSASR                | 788.4448  | 2 | 70  | y9     | 20.1  | 90.1  |
| 1372 | IPI00134475.2 | AMGAAQVVVTDLSASR                | 788.4111  | 2 | 80  | y9     | 52.75 | 132.8 |
| 1373 | IPI00134475.2 | AVEAFETAK                       | 483.2503  | 2 | 30  | y7     | 65.15 | 95.2  |
| 1374 | IPI00134475.2 | AVEAFETAK                       | 965.5399  | 1 | 32  | y6     | 52.95 | 85.0  |
| 1375 | IPI00134475.2 | AVEAFETAKK                      | 547.2983  | 2 | 35  | y8     | 58.1  | 93.1  |
| 1376 | IPI00134475.2 | ETPQEIASK                       | 501.7594  | 2 | 30  |        | 0     | 30.0  |
| 1377 | IPI00134475.2 | GENLSLVVHGPDIR                  | 781.9193  | 2 | 39  | c b9   | 4.95  | 44.0  |
| 1378 | IPI00134475.2 | GENLSLVVHGPDIRLENYPIPELGPNDVLLK | 1156.9592 | 3 | 35  | b9     | 4.95  | 40.0  |
| 1379 | IPI00134475.2 | GENLSLVVHGPDIRLENYPIPELGPNDVLLK | 1156.9586 | 3 | 40  | y8     | 12.85 | 52.9  |
| 1380 | IPI00134475.2 | GENLSLVVHGPDIRLENYPIPELGPNDVLLK | 1156.9585 | 3 | 46  |        | 0     | 46.0  |
| 1381 | IPI00134475.2 | GSVSLGNK                        | 381.2115  | 2 | 42  | y5     | 38.2  | 80.2  |
| 1382 | IPI00134475.2 | HLKPGDR                         | 822.4588  | 1 | 22  |        | 0     | 22.0  |
| 1383 | IPI00134475.2 | IGDFVVK                         | 777.4671  | 1 | 21  |        | 0     | 21.0  |
| 1384 | IPI00134475.2 | IGDFVVK                         | 389.2291  | 2 | 54  | y5     | 89    | 143.0 |
| 1385 | IPI00134475.2 | KPMVLGHEAAGTVTK                 | 513.6176  | 3 | 20  |        | 0     | 20.0  |
| 1386 | IPI00134475.2 | KPMVLGHEAAGTVTK                 | 769.9273  | 2 | 82  | y10    | 72.15 | 154.2 |
| 1387 | IPI00134475.2 | LENYPIPELGPNDVLLK               | 963.0271  | 2 | 22  | y8     | 33.75 | 55.8  |
| 1388 | IPI00134475.2 | LENYPIPELGPNDVLLK               | 963.0272  | 2 | 31  | c b4 P | 18.5  | 49.5  |
| 1389 | IPI00134475.2 | LENYPIPELGPNDVLLK               | 963.0270  | 2 | 35  | y8     | 46.75 | 81.8  |
| 1390 | IPI00134475.2 | PLVTHRFPLEK                     | 668.8908  | 2 | 29  | c b7 P | 14.55 | 43.6  |
| 1391 | IPI00134475.2 | RGSVSLGNK                       | 459.2615  | 2 | 29  | c b7   | 1.75  | 30.8  |

|      |               |                             |           |   |    |       |       |       |
|------|---------------|-----------------------------|-----------|---|----|-------|-------|-------|
| 1392 | IPI00134475.2 | TLNVKPLVTHR                 | 426.5943  | 3 | 30 |       | 0     | 30.0  |
| 1393 | IPI00134475.2 | TLNVKPLVTHRFPLEK            | 631.3768  | 3 | 18 |       | 0     | 18.0  |
| 1394 | IPI00134475.2 | VAIEPGVPR                   | 469.2773  | 2 | 46 | P y5  | 69.75 | 115.8 |
| 1395 | IPI00134475.2 | VGELVK                      | 322.7026  | 2 | 49 | y5    | 62.3  | 111.3 |
| 1396 | IPI00127206.4 | AHRFPALTPEQKK               | 391.9706  | 4 | 39 |       | 0     | 39.0  |
| 1397 | IPI00127206.4 | AHRFPALTPEQKK               | 522.2915  | 3 | 42 | P y5  | 52.95 | 95.0  |
| 1398 | IPI00127206.4 | ALQASALAAWGGK               | 622.3449  | 2 | 88 | y6    | 89    | 177.0 |
| 1399 | IPI00127206.4 | ATQEAFMK                    | 463.2260  | 2 | 37 | y5    | 69.9  | 106.9 |
| 1400 | IPI00127206.4 | DGVDFGK                     | 737.3521  | 1 | 34 | y6    | 69.75 | 103.8 |
| 1401 | IPI00127206.4 | DGVDFGK                     | 369.1768  | 2 | 49 | y5    | 38.2  | 87.2  |
| 1402 | IPI00127206.4 | DSQGNLFR                    | 468.7308  | 2 | 43 |       | 0     | 43.0  |
| 1403 | IPI00127206.4 | ELLFSVDNSISQSIGGVILFHETLYQK | 1013.5343 | 3 | 20 |       | 0     | 20.0  |
| 1404 | IPI00127206.4 | ELLFSVDNSISQSIGGVILFHETLYQK | 1013.5344 | 3 | 22 |       | 0     | 22.0  |
| 1405 | IPI00127206.4 | ELLFSVDNSISQSIGGVILFHETLYQK | 1013.5389 | 3 | 25 |       | 0     | 25.0  |
| 1406 | IPI00127206.4 | ELSEIAQR                    | 473.2535  | 2 | 37 |       | 0     | 37.0  |
| 1407 | IPI00127206.4 | ELSEIAQR                    | 945.5180  | 1 | 37 | y7    | 22.4  | 59.4  |
| 1408 | IPI00127206.4 | ETTIQGLDGLSER               | 709.8688  | 2 | 60 | y8    | 22.4  | 82.4  |
| 1409 | IPI00127206.4 | GILADESVGTMGNR              | 745.8829  | 2 | 54 | y4    | 16.9  | 70.9  |
| 1410 | IPI00127206.4 | GIVVGIK                     | 343.2338  | 2 | 38 | y4    | 57.05 | 95.1  |
| 1411 | IPI00127206.4 | IKVENTEENRR                 | 694.3678  | 2 | 25 |       | 0     | 25.0  |
| 1412 | IPI00127206.4 | IKVENTEENRR                 | 463.5824  | 3 | 27 |       | 0     | 27.0  |
| 1413 | IPI00127206.4 | KATQEAFMK                   | 527.7756  | 2 | 32 | y7    | 61.35 | 93.4  |
| 1414 | IPI00127206.4 | KYTPEQVAMATVTALHR           | 639.6764  | 3 | 34 | y5    | 15.6  | 49.6  |
| 1415 | IPI00127206.4 | KYTPEQVAMATVTALHR           | 639.3415  | 3 | 51 | y5    | 15.6  | 66.6  |
| 1416 | IPI00127206.4 | KYTPEQVAMATVTALHR           | 639.3416  | 3 | 56 | y5    | 27.2  | 83.2  |
| 1417 | IPI00127206.4 | LSFSYGR                     | 829.4436  | 1 | 18 |       | 0     | 18.0  |
| 1418 | IPI00127206.4 | LSFSYGR                     | 415.2139  | 2 | 23 | y5    | 25.35 | 48.4  |
| 1419 | IPI00127206.4 | VLAAYK                      | 382.2392  | 2 | 41 | y6    | 57.05 | 98.1  |
| 1420 | IPI00404801.1 | AFDSGIIPMEFVNK              | 784.3948  | 2 | 62 | P y7  | 95.65 | 157.7 |
| 1421 | IPI00404801.1 | AFDSGIIPMEFVNK              | 784.3949  | 2 | 66 | P y7  | 95.65 | 161.7 |
| 1422 | IPI00404801.1 | EKHPEG                      | 348.6517  | 2 | 20 |       | 0     | 20.0  |
| 1423 | IPI00404801.1 | IGNTGGMLDNILASK             | 752.9121  | 2 | 44 |       | 0     | 44.0  |
| 1424 | IPI00404801.1 | IGNTGGMLDNILASK             | 752.8954  | 2 | 53 |       | 0     | 53.0  |
| 1425 | IPI00404801.1 | LGLVGVNLSLDGVK              | 692.4134  | 2 | 54 | y8    | 21.2  | 75.2  |
| 1426 | IPI00404801.1 | SFDELGEIISVYEDLVAK          | 1078.5423 | 2 | 76 | c b8  | 5.35  | 81.4  |
| 1427 | IPI00404801.1 | SFDELGEIISVYEDLVAK          | 1078.5425 | 2 | 77 |       | 0     | 77.0  |
| 1428 | IPI00404801.1 | SGGMSNELNIIISR              | 746.4020  | 2 | 76 | y7    | 46.75 | 122.8 |
| 1429 | IPI00353727.3 | GLGTDNTLIR                  | 587.8084  | 2 | 63 | y7    | 23.75 | 86.8  |
| 1430 | IPI00353727.3 | SELSSNFEQVILGLMTPVLYDVQELRR | 1080.5668 | 3 | 65 | b7    | 0.55  | 65.6  |
| 1431 | IPI00353727.3 | SELSSNFEQVILGLMTPVLYDVQELRR | 1080.2344 | 3 | 75 |       | 0     | 75.0  |
| 1432 | IPI00353727.3 | SELSSNFEQVILGLMTPVLYDVQELRR | 1080.5725 | 3 | 78 | y++14 | 54.8  | 132.8 |

|      |               |                                         |           |   |     |        |       |       |
|------|---------------|-----------------------------------------|-----------|---|-----|--------|-------|-------|
| 1433 | IPI00353727.3 | SELSSNFEQVILGLMTPTVLYDVQELRR            | 1080.5679 | 3 | 81  | y6     | 8.5   | 89.5  |
| 1434 | IPI00319652.1 | AHPLFTFLR                               | 367.8784  | 3 | 21  |        | 0     | 21.0  |
| 1435 | IPI00319652.1 | AHPLFTFLR                               | 551.3145  | 2 | 44  | P y7   | 61.35 | 105.4 |
| 1436 | IPI00319652.1 | FLVGPDPVPRR                             | 656.3812  | 2 | 24  | y6     | 25.35 | 49.4  |
| 1437 | IPI00319652.1 | FRTIDIEPIETLLSQSGNS                     | 1182.5902 | 2 | 56  | c b7 P | 22.4  | 78.4  |
| 1438 | IPI00319652.1 | LSAAAQSTVYAFSARPLTGGEVSLGSLR            | 969.8515  | 3 | 41  | y++19  | 7.85  | 48.9  |
| 1439 | IPI00319652.1 | LSAAAQSTVYAFSARPLTGGEVSLGSLR            | 969.8519  | 3 | 60  | P y8   | 11.55 | 71.6  |
| 1440 | IPI00319652.1 | PLTGGEVSLGSLR                           | 691.8960  | 2 | 42  | P y8   | 20.1  | 62.1  |
| 1441 | IPI00319652.1 | TIDIEPIETLLSQSGNS                       | 1031.0064 | 2 | 41  | c b5 P | 44.5  | 85.5  |
| 1442 | IPI00319652.1 | TIDIEPIETLLSQSGNS                       | 687.6735  | 3 | 42  |        | 0     | 42.0  |
| 1443 | IPI00319652.1 | TIDIEPIETLLSQSGNS                       | 1030.5043 | 2 | 54  | y7     | 58.1  | 112.1 |
| 1444 | IPI00319652.1 | TIDIEPIETLLSQSGNS                       | 687.6735  | 3 | 54  |        | 0     | 54.0  |
| 1445 | IPI00319652.1 | YVRPGGGFEPNFTLFEK                       | 653.3316  | 3 | 24  | c b9 P | 55.3  | 79.3  |
| 1446 | IPI00319652.1 | YVRPGGGFEPNFTLFEK                       | 653.3363  | 3 | 25  |        | 0     | 25.0  |
| 1447 | IPI00319652.1 | YVRPGGGFEPNFTLFEK                       | 653.6726  | 3 | 29  | c b9 P | 28.95 | 58.0  |
| 1448 | IPI00122565.1 | KFDLGQDVIDFTGHSLALYR                    | 766.0675  | 3 | 55  | y6     | 14.55 | 69.6  |
| 1449 | IPI00122565.1 | KFDLGQDVIDFTGHSLALYR                    | 766.0648  | 3 | 55  | y++17  | 36.85 | 91.9  |
| 1450 | IPI00122565.1 | LPGQPPASMG                              | 555.7902  | 2 | 30  | P y7   | 52.95 | 83.0  |
| 1451 | IPI00122565.1 | LSAIYGGTYMLNKPIEEIIVQNGK                | 884.8081  | 3 | 41  |        | 0     | 41.0  |
| 1452 | IPI00122565.1 | LSAIYGGTYMLNKPIEEIIVQNGK                | 884.8120  | 3 | 44  | y6     | 16.9  | 60.9  |
| 1453 | IPI00122565.1 | SPYLYPLYGLGELPQGFAR                     | 1071.5600 | 2 | 68  | P y6   | 13.65 | 81.7  |
| 1454 | IPI00122565.1 | VLHMDQNPYYGGESASITPLEDLKY               | 947.7877  | 3 | 29  | P y7   | 61.35 | 90.4  |
| 1455 | IPI00122565.1 | VPSTEAEALASSMLGLFEK                     | 660.6715  | 3 | 41  |        | 0     | 41.0  |
| 1456 | IPI00122565.1 | VPSTEAEALASSMLGLFEK                     | 990.5018  | 2 | 105 | y8     | 31.95 | 137.0 |
| 1457 | IPI00118625.1 | DIITTELNSATDNPMVFASR                    | 1098.5391 | 2 | 55  | P y7   | 33.75 | 88.8  |
| 1458 | IPI00118625.1 | DIITTELNSATDNPMVFASR                    | 1098.5386 | 2 | 61  | P y7   | 33.75 | 94.8  |
| 1459 | IPI00118625.1 | DRFMAPDIEAAHR                           | 510.2488  | 3 | 45  | c b7   | 46.75 | 91.8  |
| 1460 | IPI00118625.1 | GQIEVAFR                                | 460.2537  | 2 | 44  | y6     | 35.8  | 79.8  |
| 1461 | IPI00118625.1 | LTVGWLGR                                | 451.2668  | 2 | 37  | y6     | 44.5  | 81.5  |
| 1462 | IPI00118625.1 | SHSSGVGKPLSPER                          | 479.9200  | 3 | 24  | P y6   | 5.85  | 29.9  |
| 1463 | IPI00118625.1 | SHSSGVGKPLSPER                          | 719.3760  | 2 | 69  | P y6   | 25.35 | 94.4  |
| 1464 | IPI00118625.1 | SLLSDHHPSEIAESHR                        | 643.9721  | 3 | 39  | y++14  | 9.3   | 48.3  |
| 1465 | IPI00118625.1 | YIALDGDSLSTEDLVNLGK                     | 1012.5148 | 2 | 55  | c b9   | 20.1  | 75.1  |
| 1466 | IPI00118625.1 | YIALDGDSLSTEDLVNLGK                     | 1012.5148 | 2 | 72  | y9     | 42.15 | 114.2 |
| 1467 | IPI00121267.1 | AAAAIMHMIMNLDPAVAQFPQELVTYGGNGQVFSNWAQF | 1128.0363 | 4 | 34  |        | 0     | 34.0  |
| 1468 | IPI00121267.1 | APVVLSR                                 | 371.2349  | 2 | 46  | y4     | 15.6  | 61.6  |
| 1469 | IPI00121267.1 | EVLSLGYHGNVVDLWER                       | 662.6725  | 3 | 18  | y5     | 29.45 | 47.5  |
| 1470 | IPI00121267.1 | EVLSLGYHGNVVDLWER                       | 663.0075  | 3 | 21  | y5     | 27.2  | 48.2  |
| 1471 | IPI00121267.1 | HLVQESLRR                               | 569.3283  | 2 | 19  | c b8   | 21.2  | 40.2  |
| 1472 | IPI00121267.1 | HLVQESLRR                               | 379.8877  | 3 | 20  | c b5   | 6.6   | 26.6  |
| 1473 | IPI00121267.1 | HQLVVG SQAR                             | 365.5408  | 3 | 28  |        | 0     | 28.0  |

|      |               |                         |          |   |    |        |       |       |
|------|---------------|-------------------------|----------|---|----|--------|-------|-------|
| 1474 | IPI00121267.1 | HQLVVGSQLR              | 547.8071 | 2 | 36 | y8     | 30.4  | 66.4  |
| 1475 | IPI00121267.1 | HVAAINR                 | 390.7274 | 2 | 18 | y5     | 41    | 59.0  |
| 1476 | IPI00121267.1 | ILYSDQK                 | 433.7348 | 2 | 25 | y5     | 52.95 | 78.0  |
| 1477 | IPI00121267.1 | LLALEFAQELR             | 651.8740 | 2 | 57 | y6     | 52.95 | 110.0 |
| 1478 | IPI00121267.1 | LQYMDNIR                | 526.7636 | 2 | 26 | y6     | 38.2  | 64.2  |
| 1479 | IPI00121267.1 | LTMSYLSK                | 471.7520 | 2 | 22 | y5     | 69.75 | 91.8  |
| 1480 | IPI00121267.1 | LVITNGMVIPNYSSR         | 832.9472 | 2 | 50 | P y6   | 38.2  | 88.2  |
| 1481 | IPI00121267.1 | MMLSWDVSNQVAR           | 733.3759 | 2 | 58 | y6     | 23.75 | 81.8  |
| 1482 | IPI00121267.1 | MTEEQTLVMYSGHPLGLFPSSPR | 860.0904 | 3 | 50 | P y5   | 6.6   | 56.6  |
| 1483 | IPI00121267.1 | MTEEQTLVMYSGHPLGLFPSSPR | 860.0903 | 3 | 63 | P y5   | 27.2  | 90.2  |
| 1484 | IPI00121267.1 | QFGHIYMYR               | 405.5308 | 3 | 15 |        | 0     | 15.0  |
| 1485 | IPI00121267.1 | QFGHIYMYR               | 607.7930 | 2 | 15 |        | 0     | 15.0  |
| 1486 | IPI00121267.1 | TPNLSPEEEQLALR          | 799.4160 | 2 | 39 | c b5 P | 18.5  | 57.5  |
| 1487 | IPI00121267.1 | WAGVPHAPVR              | 363.8699 | 3 | 16 | y4     | 16.9  | 32.9  |
| 1488 | IPI00121267.1 | YLGIEFLAGK              | 539.3002 | 2 | 34 | y6     | 33.75 | 67.8  |
| 1489 | IPI00121267.1 | YPSYVQHIMGDIQSQGFPPFR   | 816.3938 | 3 | 38 | y6     | 6.2   | 44.2  |
| 1490 | IPI00121267.1 | YPSYVQHIMGDIQSQGFPPFR   | 816.0749 | 3 | 50 | y4     | 16.9  | 66.9  |
| 1491 | gij1346343    | DVDGAYMTK               | 500.2267 | 2 | 17 | y7     | 65.15 | 82.2  |
| 1492 | gij1346343    | EDLAR                   | 603.3899 | 1 | 20 |        | 0     | 20.0  |
| 1493 | gij1346343    | FLEQQNQVLQTK            | 738.4012 | 2 | 39 |        | 0     | 39.0  |
| 1494 | gij1346343    | LLRDYQELMNTK            | 508.6010 | 3 | 17 | y4     | 41    | 58.0  |
| 1495 | gij1346343    | LNDLEDALQQAQK           | 679.3571 | 2 | 75 | y7     | 49.6  | 124.6 |
| 1496 | gij1346343    | LRSEIDNVK               | 537.3020 | 2 | 35 | c b6   | 52.95 | 88.0  |
| 1497 | gij1346343    | NMQDMVEDYRNKYEDEINK     | 812.3599 | 3 | 26 | y4     | 16.9  | 42.9  |
| 1498 | gij1346343    | QISNLQQSISDAEQRGENALK   | 777.3978 | 3 | 16 |        | 0     | 16.0  |
| 1499 | gij1346343    | QISNLQQSISDAEQRGENALK   | 777.3975 | 3 | 30 |        | 0     | 30.0  |
| 1500 | gij1346343    | SKAEAESLYQSK            | 670.8397 | 2 | 59 | y6     | 38.2  | 97.2  |
| 1501 | gij1346343    | SLDLDSIIAEVK            | 651.8608 | 2 | 87 | y8     | 58.1  | 145.1 |
| 1502 | gij1346343    | SLDLDSIIAEVK            | 651.8838 | 2 | 97 | y8     | 77.6  | 174.6 |
| 1503 | gij1346343    | THNLEPYFESFINNLR        | 665.6808 | 3 | 21 |        | 0     | 21.0  |
| 1504 | gij1346343    | THNLEPYFESFINNLR        | 665.3297 | 3 | 35 | y4     | 41    | 76.0  |
| 1505 | gij1346343    | TNAENEFVTIKK            | 697.3714 | 2 | 35 | y8     | 44.3  | 79.3  |
| 1506 | gij1346343    | WELLQQVDTSTR            | 738.3787 | 2 | 49 | y8     | 23.75 | 72.8  |
| 1507 | gij1346343    | YEELQITAGR              | 590.3041 | 2 | 70 | y8     | 44.3  | 114.3 |
| 1508 | IPI00126208.1 | AAVSGLWQK               | 444.7508 | 2 | 30 | y6     | 89    | 119.0 |
| 1509 | IPI00126208.1 | DFTPAAQAQAFQK           | 647.8333 | 2 | 48 | P y9   | 102.9 | 150.9 |
| 1510 | IPI00126208.1 | KVITAFNDGLNHLDSLK       | 629.0164 | 3 | 38 | y7     | 75.6  | 113.6 |
| 1511 | IPI00126208.1 | KVITAFNDGLNHLDSLK       | 629.3469 | 3 | 40 | y++14  | 48.5  | 88.5  |
| 1512 | IPI00126208.1 | LHVDPENFR               | 376.1931 | 3 | 20 | c b4 P | 49.1  | 69.1  |
| 1513 | IPI00126208.1 | LHVDPENFR               | 563.7861 | 2 | 29 | P y5   | 18.5  | 47.5  |
| 1514 | IPI00126208.1 | LLGNMIVIVLGHHLGK        | 429.5114 | 4 | 21 | y++9   | 29.45 | 50.5  |

|      |               |                               |           |   |    |      |       |       |
|------|---------------|-------------------------------|-----------|---|----|------|-------|-------|
| 1515 | IPI00126208.1 | LLGNMIVIVLGHHLGK              | 572.0152  | 3 | 25 |      | 0     | 25.0  |
| 1516 | IPI00126208.1 | LLGNMIVIVLGHHLGK              | 429.2603  | 4 | 31 | b6   | 1.05  | 32.1  |
| 1517 | IPI00126208.1 | LLVVYPWTQR                    | 637.8819  | 2 | 31 | P y5 | 14.55 | 45.6  |
| 1518 | IPI00126208.1 | VHLTDAEK                      | 456.7427  | 2 | 25 | y6   | 65.15 | 90.2  |
| 1519 | IPI00126208.1 | VITAFNDGLNHLDSLK              | 586.6473  | 3 | 22 |      | 0     | 22.0  |
| 1520 | IPI00126208.1 | VITAFNDGLNHLDSLK              | 879.4669  | 2 | 68 | y7   | 49.6  | 117.6 |
| 1521 | IPI00126208.1 | VNADEVGGEALGR                 | 643.8209  | 2 | 91 | y7   | 22.4  | 113.4 |
| 1522 | IPI00126208.1 | VVAGVAAALAHK                  | 369.5611  | 3 | 28 |      | 0     | 28.0  |
| 1523 | IPI00126208.1 | VVAGVAAALAHK                  | 553.8378  | 2 | 62 | y7   | 52.95 | 115.0 |
| 1524 | IPI00126208.1 | YFDSFGDLSSASAIMGNAK           | 991.4583  | 2 | 61 | c b8 | 12.15 | 73.2  |
| 1525 | IPI00126208.1 | YFDSFGDLSSASAIMGNAK           | 991.4579  | 2 | 74 | y10  | 27.7  | 101.7 |
| 1526 | IPI00343354.2 | EITALAPSTMK                   | 581.3128  | 2 | 29 | y6   | 57.05 | 86.1  |
| 1527 | IPI00343354.2 | IIAPPER                       | 398.2398  | 2 | 18 | P y4 | 29.45 | 47.5  |
| 1528 | IPI00343354.2 | IIAPPERK                      | 308.5272  | 3 | 21 | c b6 | 1.25  | 22.3  |
| 1529 | IPI00230707.4 | ATVVESSEK                     | 475.2536  | 2 | 29 | y5   | 29.45 | 58.5  |
| 1530 | IPI00230707.4 | AYSEAHEISK                    | 567.7754  | 2 | 64 | y8   | 58.1  | 122.1 |
| 1531 | IPI00230707.4 | LAEQAERYDDMAAMK               | 604.9482  | 3 | 37 | y5   | 38.2  | 75.2  |
| 1532 | IPI00230707.4 | NLLSVAYK                      | 454.2662  | 2 | 25 | y5   | 75.6  | 100.6 |
| 1533 | IPI00230707.4 | NLLSVAYK                      | 907.5667  | 1 | 37 |      | 0     | 37.0  |
| 1534 | IPI00230707.4 | NVTELNEPLSNEER                | 822.4180  | 2 | 69 | P y7 | 33.75 | 102.8 |
| 1535 | IPI00230707.4 | TAFDDAIAELDTLNEDSYK           | 1066.4920 | 2 | 65 | y6   | 82.65 | 147.7 |
| 1536 | IPI00230707.4 | TAFDDAIAELDTLNEDSYK           | 1066.4918 | 2 | 68 | y6   | 52.95 | 121.0 |
| 1537 | IPI00230707.4 | TAFDDAIAELDTLNEDSYKDSTLIMQLLR | 1101.8817 | 3 | 59 | y6   | 14.55 | 73.6  |
| 1538 | IPI00230707.4 | VISSIEQK                      | 452.2611  | 2 | 35 | y6   | 52.95 | 88.0  |
| 1539 | IPI00323661.1 | GAAQNIIPASTGAAK               | 685.3775  | 2 | 20 | P y8 | 44.3  | 64.3  |
| 1540 | IPI00323661.1 | GAAQNIIPASTGAAK               | 686.3805  | 2 | 21 | y9   | 66.55 | 87.6  |
| 1541 | IPI00323661.1 | LISWYDNEYGYSNR                | 890.9060  | 2 | 43 | y6   | 6.2   | 49.2  |
| 1542 | IPI00323661.1 | LISWYDNEYGYSNR                | 890.9058  | 2 | 63 | y5   | 25.35 | 88.4  |
| 1543 | IPI00323661.1 | LISWYDNEYGYSNR                | 890.4024  | 2 | 64 | y5   | 14.55 | 78.6  |
| 1544 | IPI00323661.1 | PAKYDDIKK                     | 539.3002  | 2 | 53 | c b6 | 44.5  | 97.5  |
| 1545 | IPI00323661.1 | QASEGPLK                      | 829.4434  | 1 | 24 |      | 0     | 24.0  |
| 1546 | IPI00323661.1 | RVIISAPSADAPMFVMGVNHEK        | 593.0589  | 4 | 18 | b5   | 1.4   | 19.4  |
| 1547 | IPI00323661.1 | RVIISAPSADAPMFVMGVNHEK        | 593.0590  | 4 | 19 |      | 0     | 19.0  |
| 1548 | IPI00323661.1 | RVIISAPSADAPMFVMGVNHEK        | 593.0634  | 4 | 26 |      | 0     | 26.0  |
| 1549 | IPI00323661.1 | RVIISAPSADAPMFVMGVNHEK        | 790.7418  | 3 | 43 | y6   | 27.2  | 70.2  |
| 1550 | IPI00323661.1 | RVIISAPSADAPMFVMGVNHEK        | 790.4308  | 3 | 48 | y4   | 18.5  | 66.5  |
| 1551 | IPI00323661.1 | RVIISAPSADAPMFVMGVNHEK        | 790.7676  | 3 | 49 | y6   | 27.2  | 76.2  |
| 1552 | IPI00323661.1 | VEIVAINDPFIDLNYMVYMFQYDSTHGK  | 1108.5299 | 3 | 19 |      | 0     | 19.0  |
| 1553 | IPI00323661.1 | VEIVAINDPFIDLNYMVYMFQYDSTHGK  | 1108.8191 | 3 | 21 | b8 P | 25.35 | 46.4  |
| 1554 | IPI00323661.1 | VEIVAINDPFIDLNYMVYMFQYDSTHGK  | 1108.4617 | 3 | 25 |      | 0     | 25.0  |
| 1555 | IPI00323661.1 | VGVNGFGR                      | 403.7117  | 2 | 44 | y4   | 7.1   | 51.1  |

|      |               |                                 |           |   |    |       |       |       |
|------|---------------|---------------------------------|-----------|---|----|-------|-------|-------|
| 1556 | IPI00323661.1 | VVDLMAYMASKE                    | 678.8319  | 2 | 24 |       | 0     | 24.0  |
| 1557 | IPI00323661.1 | VVDLMAYMASKE                    | 678.8302  | 2 | 36 | c b7  | 6.6   | 42.6  |
| 1558 | IPI00323661.1 | WGEAGAEEYVVESTGVFTTMEK          | 1146.0278 | 2 | 71 | y6    | 14.55 | 85.6  |
| 1559 | IPI00130640.1 | AAQVAALPR                       | 530.3008  | 2 | 30 | c b8  | 5.55  | 35.6  |
| 1560 | IPI00130640.1 | AAQVAALPR                       | 530.3008  | 2 | 51 | c b7  | 1.4   | 52.4  |
| 1561 | IPI00130640.1 | APAAIGPYSQAVQVDR                | 821.9675  | 2 | 57 | c b5  | 57.05 | 114.1 |
| 1562 | IPI00130640.1 | APAAIGPYSQAVQVDR                | 821.9511  | 2 | 73 | y4    | 16.9  | 89.9  |
| 1563 | IPI00130640.1 | GSRVEIEAIAVQGPFIKA              | 629.3572  | 3 | 20 |       | 0     | 20.0  |
| 1564 | IPI00130640.1 | TTVLLADMNDFGTVNEIYK             | 1073.0314 | 2 | 59 | y5    | 75.6  | 134.6 |
| 1565 | IPI00130640.1 | TTVLLADMNDFGTVNEIYK             | 1073.0362 | 2 | 65 | y5    | 52.95 | 118.0 |
| 1566 | IPI00130640.1 | TTVLLADMNDFGTVNEIYK             | 1073.0359 | 2 | 65 | y5    | 75.6  | 140.6 |
| 1567 | IPI00130640.1 | TYFQGS LPAR                     | 570.2962  | 2 | 46 | y8    | 30.4  | 76.4  |
| 1568 | IPI00130640.1 | VEIEAIAVQGPFIKA                 | 793.4551  | 2 | 25 | P y5  | 97.85 | 122.9 |
| 1569 | IPI00330804.1 | ALLFVPR                         | 408.2603  | 2 | 27 | y4    | 27.2  | 54.2  |
| 1570 | IPI00330804.1 | DNSTMGYMAAK                     | 594.7558  | 2 | 55 | y6    | 35.8  | 90.8  |
| 1571 | IPI00330804.1 | DQVANS AFVER                    | 618.3049  | 2 | 50 | y8    | 12.15 | 62.2  |
| 1572 | IPI00330804.1 | ELISNSSDALDK                    | 646.3344  | 2 | 53 | y9    | 52.75 | 105.8 |
| 1573 | IPI00330804.1 | FYEQFSK                         | 474.7272  | 2 | 36 | y5    | 52.95 | 89.0  |
| 1574 | IPI00330804.1 | HIYFITGETK                      | 604.8200  | 2 | 24 | y8    | 85.6  | 109.6 |
| 1575 | IPI00330804.1 | HLEINPDHSIETLR                  | 596.3203  | 3 | 51 | y7    | 5.55  | 56.6  |
| 1576 | IPI00330804.1 | LGIHEDSQNR                      | 390.1952  | 3 | 41 | y4    | 6.6   | 47.6  |
| 1577 | IPI00330804.1 | LGIHEDSQNRK                     | 432.8932  | 3 | 21 | c b6  | 41    | 62.0  |
| 1578 | IPI00330804.1 | TLTIVDTGIGMTK                   | 675.3717  | 2 | 42 | y9    | 28.95 | 71.0  |
| 1579 | IPI00330804.1 | TLTIVDTGIGMTK                   | 675.3717  | 2 | 64 | y8    | 58.1  | 122.1 |
| 1580 | IPI00330804.1 | TLTIVDTGIGMTK                   | 675.3715  | 2 | 70 | y8    | 61.35 | 131.4 |
| 1581 | IPI00123313.1 | AAVASLLQSVQVPEFTPK              | 943.5246  | 2 | 22 | P y6  | 82.65 | 104.7 |
| 1582 | IPI00123313.1 | AAVASLLQSVQVPEFTPK              | 943.5281  | 2 | 33 | c b7  | 0.9   | 33.9  |
| 1583 | IPI00123313.1 | KLAYVAAG                        | 396.6843  | 2 | 25 |       | 0     | 25.0  |
| 1584 | IPI00123313.1 | LAGTQPLEVLEAVQR                 | 812.4954  | 2 | 87 | y4    | 27.2  | 114.2 |
| 1585 | IPI00123313.1 | LAYVAAGDLAPINAFIGGLAAQEVMK      | 868.8014  | 3 | 21 | b10 P | 19.15 | 40.2  |
| 1586 | IPI00123313.1 | NGFLNLALPFFGFSEPLAAPR           | 1140.6011 | 2 | 41 |       | 0     | 41.0  |
| 1587 | IPI00123313.1 | VGP DTERIYDDDFQNLGDGVANALDNIDAR | 1124.2007 | 3 | 47 | y6    | 29.45 | 76.5  |
| 1588 | IPI00123313.1 | VGP DTERIYDDDFQNLGDGVANALDNIDAR | 1124.2010 | 3 | 48 | y7    | 22.4  | 70.4  |
| 1589 | IPI00123313.1 | VGP DTERIYDDDFQNLGDGVANALDNIDAR | 1123.8650 | 3 | 62 | y7    | 49.6  | 111.6 |
| 1590 | IPI00221400.3 | AAVLWELHK                       | 356.2065  | 3 | 37 |       | 0     | 37.0  |
| 1591 | IPI00221400.3 | AAVLWELHKPFTIEDIEVAPPK          | 626.5974  | 4 | 21 | y5    | 41    | 62.0  |
| 1592 | IPI00221400.3 | GAIFGGFK                        | 796.4570  | 1 | 19 | y5    | 89    | 108.0 |
| 1593 | IPI00221400.3 | GAIFGGFK                        | 398.7216  | 2 | 34 | y6    | 75.6  | 109.6 |
| 1594 | IPI00221400.3 | GAIFGGFK                        | 398.7216  | 2 | 37 | y6    | 69.75 | 106.8 |
| 1595 | IPI00221400.3 | GTLREGTSR                       | 488.7622  | 2 | 26 |       | 0     | 26.0  |
| 1596 | IPI00221400.3 | IDGASPLDK                       | 458.2427  | 2 | 29 | y5    | 41    | 70.0  |

|      |               |                         |           |   |    |         |       |       |
|------|---------------|-------------------------|-----------|---|----|---------|-------|-------|
| 1597 | IPI00221400.3 | IIAVDINK                | 885.5399  | 1 | 27 | y6      | 75.6  | 102.6 |
| 1598 | IPI00221400.3 | IIAVDINK                | 443.2736  | 2 | 44 | y6      | 69.75 | 113.8 |
| 1599 | IPI00221400.3 | INEAFDLLR               | 1090.5906 | 1 | 34 |         | 0     | 34.0  |
| 1600 | IPI00221400.3 | INEAFDLLR               | 545.7983  | 2 | 61 | y5      | 38.2  | 99.2  |
| 1601 | IPI00221400.3 | INEAFDLLR               | 545.7983  | 2 | 61 | y7      | 61.35 | 122.4 |
| 1602 | IPI00221400.3 | KFPLDPLITHVLPFEK        | 474.2770  | 4 | 19 | y++8    | 15.6  | 34.6  |
| 1603 | IPI00221400.3 | KFPLDPLITHVLPFEK        | 632.0339  | 3 | 19 | c b5 P  | 14.55 | 33.6  |
| 1604 | IPI00221400.3 | KFPLDPLITHVLPFEK        | 474.2770  | 4 | 22 | b5 P    | 27.2  | 49.2  |
| 1605 | IPI00221400.3 | KFPLDPLITHVLPFEK        | 632.0368  | 3 | 24 | c b7    | 13.65 | 37.7  |
| 1606 | IPI00221400.3 | KFPLDPLITHVLPFEK        | 632.0368  | 3 | 26 | P y4    | 44.5  | 70.5  |
| 1607 | IPI00221400.3 | KFPLDPLITHVLPFEK        | 632.0539  | 3 | 28 | P y++11 | 69.75 | 97.8  |
| 1608 | IPI00221400.3 | LVADFMAK                | 447.7415  | 2 | 38 | y6      | 69.75 | 107.8 |
| 1609 | IPI00221400.3 | LVADFMAK                | 894.5079  | 1 | 43 | y6      | 27.2  | 70.2  |
| 1610 | IPI00221400.3 | PFTIEDIEVAPPK           | 728.3891  | 2 | 62 | y8      | 46.75 | 108.8 |
| 1611 | IPI00221400.3 | PFTIEDIEVAPPK           | 728.3892  | 2 | 62 | y8      | 33.75 | 95.8  |
| 1612 | IPI00221400.3 | PFTIEDIEVAPPK           | 728.3892  | 2 | 64 | y9      | 28.95 | 93.0  |
| 1613 | IPI00221400.3 | PFTIEDIEVAPPK           | 728.3891  | 2 | 79 |         | 0     | 79.0  |
| 1614 | IPI00221400.3 | QIHNFIISTFSQYTVVDDIAVAK | 895.7906  | 3 | 17 |         | 0     | 17.0  |
| 1615 | IPI00221400.3 | QIHNFIISTFSQYTVVDDIAVAK | 895.7909  | 3 | 21 |         | 0     | 21.0  |
| 1616 | IPI00221400.3 | QIHNFIISTFSQYTVVDDIAVAK | 895.7906  | 3 | 24 | y7      | 44.3  | 68.3  |
| 1617 | IPI00221400.3 | QIHNFIISTFSQYTVVDDIAVAK | 895.7906  | 3 | 28 | y8      | 61.35 | 89.4  |
| 1618 | IPI00221400.3 | QIHNFIISTFSQYTVVDDIAVAK | 895.7906  | 3 | 30 | y7      | 25.35 | 55.4  |
| 1619 | IPI00221400.3 | QIHNFIISTFSQYTVVDDIAVAK | 895.7905  | 3 | 34 | y8      | 61.35 | 95.4  |
| 1620 | IPI00221400.3 | QIHNFIISTFSQYTVVDDIAVAK | 895.7905  | 3 | 42 | y7      | 83.9  | 125.9 |
| 1621 | IPI00221400.3 | SDLLMPR                 | 831.4659  | 1 | 24 | y5      | 38.2  | 62.2  |
| 1622 | IPI00221400.3 | SDLLMPR                 | 416.2233  | 2 | 52 | y4      | 29.45 | 81.5  |
| 1623 | IPI00139788.2 | ASDTSITWNNLK            | 675.3467  | 2 | 55 | y6      | 77.6  | 132.6 |
| 1624 | IPI00139788.2 | DFQLFSSPLGK             | 619.8490  | 2 | 56 | y7      | 13.65 | 69.7  |
| 1625 | IPI00139788.2 | DGGGDVAFVK              | 482.7401  | 2 | 77 |         | 0     | 77.0  |
| 1626 | IPI00139788.2 | DLLFRDDTK               | 561.7928  | 2 | 42 | c b7    | 35.8  | 77.8  |
| 1627 | IPI00139788.2 | HQTVLDNTEGK             | 621.3099  | 2 | 62 | y9      | 40.2  | 102.2 |
| 1628 | IPI00139788.2 | HQTVLDNTEGKNPAEWA       | 680.0070  | 3 | 30 | y7      | 35.8  | 65.8  |
| 1629 | IPI00139788.2 | HTTIFEVLPEK             | 657.3641  | 2 | 20 |         | 0     | 20.0  |
| 1630 | IPI00139788.2 | IPSHAVVAR               | 475.2826  | 2 | 43 | y7      | 61.35 | 104.4 |
| 1631 | IPI00139788.2 | KGTFQLNQLEGKK           | 535.9587  | 3 | 24 |         | 0     | 24.0  |
| 1632 | IPI00139788.2 | LPEGTTPEK               | 486.2555  | 2 | 36 |         | 0     | 36.0  |
| 1633 | IPI00139788.2 | LYLGHNYVTAIR            | 710.9056  | 2 | 19 | y++10   | 69.75 | 88.8  |
| 1634 | IPI00139788.2 | NNGKEDIWEILK            | 786.4270  | 2 | 43 | y5      | 38.2  | 81.2  |
| 1635 | IPI00139788.2 | TAGWNIPMGMLYNR          | 812.4117  | 2 | 44 | P y8    | 58.1  | 102.1 |
| 1636 | IPI00139788.2 | TAGWNIPMGMLYNR          | 812.3918  | 2 | 45 | P y8    | 42.15 | 87.2  |
| 1637 | IPI00139788.2 | VAQEHFGK                | 458.2376  | 2 | 40 |         | 0     | 40.0  |



|      |               |                                  |           |   |    |        |        |       |
|------|---------------|----------------------------------|-----------|---|----|--------|--------|-------|
| 1638 | IPI00400148.1 | IILLAEGR                         | 884.5945  | 1 | 21 |        | 0      | 21.0  |
| 1639 | IPI00400148.1 | MMSNGILK                         | 447.2332  | 2 | 21 | y6     | 38.2   | 59.2  |
| 1640 | IPI00400148.1 | VAVVAGYGDVGK                     | 567.8122  | 2 | 57 | y7     | 65.15  | 122.2 |
| 1641 | IPI00400148.1 | WLNENAVEK                        | 552.2815  | 2 | 47 | y7     | 95.65  | 142.7 |
| 1642 | IPI00122862.2 | ASQAPSSFQLLYDLK                  | 834.9364  | 2 | 44 |        | 0      | 44.0  |
| 1643 | IPI00122862.2 | ASQAPSSFQLLYDLK                  | 834.9363  | 2 | 47 | y4     | 29.45  | 76.5  |
| 1644 | IPI00122862.2 | AYTEEDLDLVEK                     | 712.8548  | 2 | 17 |        | 0      | 17.0  |
| 1645 | IPI00122862.2 | ERASFITPVPGGVGPMTVAMLMQSTVESQAQR | 1083.5470 | 3 | 40 | y4     | 7.7    | 47.7  |
| 1646 | IPI00122862.2 | ERASFITPVPGGVGPMTVAMLMQSTVESQAQR | 1083.5477 | 3 | 47 | y4     | 29.45  | 76.5  |
| 1647 | IPI00122862.2 | FSDIQIR                          | 439.7401  | 2 | 22 | y5     | 75.6   | 97.6  |
| 1648 | IPI00122862.2 | IFHELTQTDK                       | 411.2157  | 3 | 18 | y++9   | 25.35  | 43.4  |
| 1649 | IPI00122862.2 | IFHELTQTDK                       | 616.3196  | 2 | 29 | y7     | 23.75  | 52.8  |
| 1650 | IPI00122862.2 | LIGNLAR                          | 378.7398  | 2 | 21 | y5     | 38.2   | 59.2  |
| 1651 | IPI00122862.2 | MFGVPVVAVNVFK                    | 753.9332  | 2 | 40 |        | 0      | 40.0  |
| 1652 | IPI00122862.2 | QIENARMFGVP                      | 639.8700  | 2 | 17 |        | 0      | 17.0  |
| 1653 | IPI00122862.2 | THLSLSHNPEQK                     | 464.2408  | 3 | 21 | P y4   | 20.55  | 41.6  |
| 1654 | IPI00122862.2 | TPVPSDIAISR                      | 578.3227  | 2 | 53 | P y8   | 69.75  | 122.8 |
| 1655 | IPI00122862.2 | VVGDVAYDEAK                      | 583.2908  | 2 | 50 | y9     | 81.65  | 131.7 |
| 1656 | IPI00122862.2 | YVVVTGITPTPLGEGK                 | 816.0669  | 2 | 49 | y9     | 28.95  | 78.0  |
| 1657 | IPI00122862.2 | YVVVTGITPTPLGEGK                 | 815.9573  | 2 | 71 | P y8   | 21.2   | 92.2  |
| 1658 | IPI00114593.1 | DLTDYLMK                         | 499.7468  | 2 | 41 | y5     | 83.9   | 124.9 |
| 1659 | IPI00114593.1 | EITALAPSTMK                      | 1161.6229 | 1 | 57 | P y5   | 44.5   | 101.5 |
| 1660 | IPI00114593.1 | LDLAGR                           | 644.3736  | 1 | 22 | y4     | 32.3   | 54.3  |
| 1661 | IPI00114593.1 | LDLAGRDLTDYLMK                   | 812.4754  | 2 | 24 | y4     | 69.9   | 93.9  |
| 1662 | IPI00114593.1 | YPIEHGIITNWDDMEK                 | 654.3151  | 3 | 19 | y6     | 33.75  | 52.8  |
| 1663 | IPI00114593.1 | YPIEHGIITNWDDMEK                 | 980.9587  | 2 | 30 |        | 0      | 30.0  |
| 1664 | IPI00114593.1 | YPIEHGIITNWDDMEK                 | 980.9586  | 2 | 36 | c b8   | 44.3   | 80.3  |
| 1665 | IPI00230204.5 | APPSVFAQVPQAPPVLVFK              | 997.0749  | 2 | 35 |        | 0      | 35.0  |
| 1666 | IPI00230204.5 | APPSVFAQVPQAPPVLVFK              | 997.0710  | 2 | 36 | c b9 P | 19.15  | 55.2  |
| 1667 | IPI00230204.5 | FLFPFFDSAYQGFASGDLEK             | 1144.0415 | 2 | 58 | y6     | 29.45  | 87.5  |
| 1668 | IPI00230204.5 | FLFPFFDSAYQGFASGDLEK             | 1144.0414 | 2 | 85 | y7     | 23.75  | 108.8 |
| 1669 | IPI00230204.5 | HIYLLPSGR                        | 528.3032  | 2 | 40 | y7     | 31.95  | 72.0  |
| 1670 | IPI00230204.5 | IANDNSLNHEYLPILGLAEFR            | 800.7501  | 3 | 23 | y6     | 6.2    | 29.2  |
| 1671 | IPI00230204.5 | IANDNSLNHEYLPILGLAEFR            | 800.7501  | 3 | 29 | y6     | 6.2    | 35.2  |
| 1672 | IPI00230204.5 | IANDNSLNHEYLPILGLAEFR            | 800.7503  | 3 | 35 | y4     | 16.9   | 51.9  |
| 1673 | IPI00230204.5 | IGADFLGR                         | 424.7354  | 2 | 53 | y7     | 46.75  | 99.8  |
| 1674 | IPI00230204.5 | IVAATLSDPELFK                    | 702.4047  | 2 | 60 | y6     | 69.75  | 129.8 |
| 1675 | IPI00230204.5 | LTADFRDDDPDRK                    | 515.9266  | 3 | 19 | y++11  | 22.4   | 41.4  |
| 1676 | IPI00230204.5 | NTPIYVSSPTWENHNAVFSAGFK          | 880.0956  | 3 | 20 |        | 0      | 20.0  |
| 1677 | IPI00230204.5 | QVEYLVNEK                        | 561.2959  | 2 | 35 | y5     | 52.95  | 88.0  |
| 1678 | IPI00230204.5 | TDESQPWWLPVVR                    | 763.4358  | 2 | 27 | P y8   | 115.75 | 142.8 |

|      |               |                                 |           |   |     |         |       |       |
|------|---------------|---------------------------------|-----------|---|-----|---------|-------|-------|
| 1679 | IPI00230204.5 | VGGVQSLGGTGALR                  | 636.3588  | 2 | 32  | y9      | 4.8   | 36.8  |
| 1680 | IPI00230204.5 | VNLGVGAYRTDESQPWWLPVVR          | 819.4418  | 3 | 26  | P y8    | 85.6  | 111.6 |
| 1681 | IPI00331436.1 | ANKPGDVVR                       | 478.2695  | 2 | 28  | P y6    | 69.75 | 97.8  |
| 1682 | IPI00331436.1 | ANKPGDVVR                       | 319.1824  | 3 | 30  | P y6    | 14.55 | 44.6  |
| 1683 | IPI00331436.1 | ASANMDLMR                       | 504.7344  | 2 | 46  | y7      | 22.4  | 68.4  |
| 1684 | IPI00331436.1 | GITFDSSGGISIK                   | 597.8218  | 2 | 57  | y8      | 42.15 | 99.2  |
| 1685 | IPI00331436.1 | GMSGRPTR                        | 431.2216  | 2 | 16  |         | 0     | 16.0  |
| 1686 | IPI00331436.1 | GSEPPVFLEIHVMGSPNATEAPLVFVGK    | 1039.5240 | 3 | 19  | P y7    | 52.95 | 72.0  |
| 1687 | IPI00331436.1 | GSEPPVFLEIHVMGSPNATEAPLVFVGK    | 1039.5191 | 3 | 30  |         | 0     | 30.0  |
| 1688 | IPI00331436.1 | GSEPPVFLEIHVMGSPNATEAPLVFVGK    | 1039.5242 | 3 | 32  | P y++13 | 27.7  | 59.7  |
| 1689 | IPI00331436.1 | GVLFASGQNLAR                    | 616.8405  | 2 | 65  | y7      | 22.4  | 87.4  |
| 1690 | IPI00331436.1 | HLMESPANEMTPTR                  | 538.5855  | 3 | 22  | y4      | 41    | 63.0  |
| 1691 | IPI00331436.1 | LREMLNISGPPLK                   | 489.9503  | 3 | 20  | y6      | 38.2  | 58.2  |
| 1692 | IPI00331436.1 | MPLFEHYTR                       | 597.2917  | 2 | 34  | y6      | 38.2  | 72.2  |
| 1693 | IPI00331436.1 | TFYGLHQDFPSVVVVGLGK             | 688.7264  | 3 | 29  | y6      | 23.75 | 52.8  |
| 1694 | IPI00331436.1 | TFYGLHQDFPSVVVVGLGK             | 688.3932  | 3 | 30  | P y++10 | 16.9  | 46.9  |
| 1695 | IPI00331436.1 | TIQVDNTDAEGR                    | 659.8157  | 2 | 63  | y9      | 28.95 | 92.0  |
| 1696 | IPI00123927.1 | DQSPASHEIATNLGDFAISLYR          | 802.7315  | 3 | 34  |         | 0     | 34.0  |
| 1697 | IPI00123927.1 | DQSPASHEIATNLGDFAISLYR          | 802.7314  | 3 | 36  | y4      | 15.6  | 51.6  |
| 1698 | IPI00123927.1 | ELISKFLLNR                      | 616.8539  | 2 | 60  | y7      | 33.75 | 93.8  |
| 1699 | IPI00123927.1 | FLEEAK                          | 736.3887  | 1 | 21  | c b4    | 62.3  | 83.3  |
| 1700 | IPI00123927.1 | IFNSGADLSGITEENAPLK             | 989.0045  | 2 | 88  | y8      | 61.35 | 149.4 |
| 1701 | IPI00123927.1 | IFNSGADLSGITEENAPLK             | 989.0044  | 2 | 109 | y++16   | 15.5  | 124.5 |
| 1702 | IPI00123927.1 | IVEAVK                          | 329.7107  | 2 | 24  | y5      | 69.75 | 93.8  |
| 1703 | IPI00123927.1 | KVINDFVEK                       | 546.3091  | 2 | 42  | y7      | 22.4  | 64.4  |
| 1704 | IPI00123927.1 | MQHLEQTLNK                      | 414.5486  | 3 | 22  |         | 0     | 22.0  |
| 1705 | IPI00123927.1 | SFQHLLQTLNRPDSELQLSTGNGLFVNNDLK | 875.7061  | 4 | 17  | y5      | 52.95 | 70.0  |
| 1706 | IPI00123927.1 | SFQHLLQTLNRPDSELQLSTGNGLFVNNDLK | 875.9571  | 4 | 21  | y7      | 35.8  | 56.8  |
| 1707 | IPI00123927.1 | VINDFVEK                        | 482.2605  | 2 | 24  | y6      | 89    | 113.0 |
| 1708 | IPI00123927.1 | VVDPTHK                         | 398.2222  | 2 | 23  | y5      | 25.35 | 48.4  |
| 1709 | IPI00341107.2 | VGVNGFGR                        | 403.2197  | 2 | 53  | y5      | 27.2  | 80.2  |
| 1710 | IPI00344499.2 | ANYLASPPLVIAYAIAGTVR            | 1031.0829 | 2 | 28  | c b6 P  | 0.7   | 28.7  |
| 1711 | IPI00344499.2 | ANYLASPPLVIAYAIAGTVR            | 1031.0830 | 2 | 37  | c b6 P  | 6.6   | 43.6  |
| 1712 | IPI00344499.2 | AVLAESYER                       | 519.2667  | 2 | 46  | y7      | 33.75 | 79.8  |
| 1713 | IPI00344499.2 | EPLGVNAQGR                      | 520.7784  | 2 | 28  | y5      | 38.2  | 66.2  |
| 1714 | IPI00344499.2 | FVEFFGPGVAQLSIADR               | 927.4822  | 2 | 51  | y5      | 14.55 | 65.6  |
| 1715 | IPI00344499.2 | FVEFFGPGVAQLSIADR               | 927.4855  | 2 | 61  | c b9    | 30.4  | 91.4  |
| 1716 | IPI00344499.2 | GPFLLGK                         | 422.7687  | 2 | 41  |         | 0     | 41.0  |
| 1717 | IPI00344499.2 | GTFANIR                         | 389.7143  | 2 | 37  | y5      | 52.95 | 90.0  |
| 1718 | IPI00344499.2 | KLGGNPEK                        | 421.7405  | 2 | 38  | y7      | 46.75 | 84.8  |
| 1719 | IPI00344499.2 | KNDIENILNWNVMQHK                | 666.3465  | 3 | 31  | y6      | 14.55 | 45.6  |

|      |               |                                |           |   |    |        |       |       |
|------|---------------|--------------------------------|-----------|---|----|--------|-------|-------|
| 1720 | IPI00344499.2 | KNDIENILNWNVMQHK               | 666.0162  | 3 | 41 | y++15  | 98.15 | 139.2 |
| 1721 | IPI00344499.2 | LYAWNPK                        | 446.2403  | 2 | 18 | y5     | 52.95 | 71.0  |
| 1722 | IPI00344499.2 | NQDLEFER                       | 525.7468  | 2 | 32 | y6     | 52.95 | 85.0  |
| 1723 | IPI00344499.2 | RGNDAIMAR                      | 502.2588  | 2 | 27 | y5     | 41    | 68.0  |
| 1724 | IPI00344499.2 | SNLVGMGVIPLEYLPGETADSLGLTGR    | 920.8162  | 3 | 33 | y5     | 6.2   | 39.2  |
| 1725 | IPI00344499.2 | SNLVGMGVIPLEYLPGETADSLGLTGR    | 920.8164  | 3 | 34 | y5     | 6.2   | 40.2  |
| 1726 | IPI00344499.2 | SNLVGMGVIPLEYLPGETADSLGLTGR    | 920.8163  | 3 | 34 | y8     | 7.1   | 41.1  |
| 1727 | IPI00344499.2 | SPPFFESLTLDLQPPK               | 908.4725  | 2 | 29 |        | 0     | 29.0  |
| 1728 | IPI00344499.2 | SPPFFESLTLDLQPPK               | 908.9805  | 2 | 31 |        | 0     | 31.0  |
| 1729 | IPI00344499.2 | TFQAVMR                        | 426.7235  | 2 | 35 | y4     | 16.9  | 51.9  |
| 1730 | IPI00344499.2 | VILQDFTGVPVVDFAAMR             | 1025.5481 | 2 | 68 | c b9 P | 2.15  | 70.2  |
| 1731 | IPI00344499.2 | YQQAGLPLIVLAGK                 | 735.9487  | 2 | 25 | P y8   | 73.4  | 98.4  |
| 1732 | IPI00344499.2 | YQQAGLPLIVLAGK                 | 736.4386  | 2 | 27 |        | 0     | 27.0  |
| 1733 | IPI00330760.4 | ELASQPDVDGFLVGGASLKPEFVDIINAK  | 1011.1994 | 3 | 25 | b5 P   | 18.5  | 43.5  |
| 1734 | IPI00330760.4 | ELASQPDVDGFLVGGASLKPEFVDIINAK  | 1010.8698 | 3 | 28 |        | 0     | 28.0  |
| 1735 | IPI00330760.4 | ELASQPDVDGFLVGGASLKPEFVDIINAK  | 1011.1997 | 3 | 38 | b5 P   | 6.2   | 44.2  |
| 1736 | IPI00330760.4 | ELASQPDVDGFLVGGASLKPEFVDIINAKQ | 1053.5526 | 3 | 25 | b5 P   | 20.55 | 45.6  |
| 1737 | IPI00330760.4 | ELASQPDVDGFLVGGASLKPEFVDIINAKQ | 1053.5531 | 3 | 31 |        | 0     | 31.0  |
| 1738 | IPI00330760.4 | FFVGGNWK                       | 477.7460  | 2 | 23 | y5     | 44.5  | 67.5  |
| 1739 | IPI00330760.4 | HVFGESDELIGQK                  | 486.9123  | 3 | 39 | y4     | 15.6  | 54.6  |
| 1740 | IPI00330760.4 | HVFGESDELIGQK                  | 729.8763  | 2 | 53 | y8     | 73.4  | 126.4 |
| 1741 | IPI00330760.4 | LDEREAGITEK                    | 420.8864  | 3 | 22 | y5     | 32.3  | 54.3  |
| 1742 | IPI00330760.4 | RHVFGESDELIGQK                 | 538.9461  | 3 | 57 | y4     | 49.1  | 106.1 |
| 1743 | IPI00330760.4 | SNVNDGVAQSTR                   | 624.3032  | 2 | 67 | y5     | 38.2  | 105.2 |
| 1744 | IPI00330760.4 | TATPQQAQEVHEK                  | 733.8650  | 2 | 37 | y++11  | 31.95 | 69.0  |
| 1745 | IPI00330760.4 | VTNGAFTGEISPGMIK               | 811.4145  | 2 | 56 | P y5   | 49.1  | 105.1 |
| 1746 | IPI00330760.4 | VVFEQTK                        | 425.7371  | 2 | 22 | y5     | 69.75 | 91.8  |
| 1747 | IPI00330760.4 | VVLAYEPVWAIGTGK                | 534.9720  | 3 | 45 |        | 0     | 45.0  |
| 1748 | IPI00337024.1 | ALDLDPSK                       | 429.7507  | 2 | 29 | y6     | 46.75 | 75.8  |
| 1749 | IPI00337024.1 | DMDLIDVNEAFAPQFLSVQK           | 1141.0666 | 2 | 70 | P y8   | 58.1  | 128.1 |
| 1750 | IPI00337024.1 | LPMGMTAENLAAK                  | 673.8554  | 2 | 68 | y8     | 44.3  | 112.3 |
| 1751 | IPI00337024.1 | VGVP TETGALTLNR                | 714.4315  | 2 | 76 | y4     | 29.45 | 105.5 |
| 1752 | IPI00121126.2 | AQGSVALSVTQDPAR                | 750.3989  | 2 | 48 | y8     | 12.15 | 60.2  |
| 1753 | IPI00121126.2 | AWLDGHSR                       | 314.4913  | 3 | 20 |        | 0     | 20.0  |
| 1754 | IPI00121126.2 | AWLDGHSR                       | 471.2334  | 2 | 21 | y5     | 44.5  | 65.5  |
| 1755 | IPI00121126.2 | AWLDGHSR                       | 471.2333  | 2 | 30 | y6     | 22.4  | 52.4  |
| 1756 | IPI00121126.2 | DLGTQLAPIIQEFFHSEQYR           | 1197.1074 | 2 | 48 | y6     | 14.55 | 62.6  |
| 1757 | IPI00121126.2 | DVPIRQGEIFLLPAR                | 575.3414  | 3 | 17 |        | 0     | 17.0  |
| 1758 | IPI00121126.2 | DVPIRQGEIFLLPAR                | 575.6724  | 3 | 19 |        | 0     | 19.0  |
| 1759 | IPI00121126.2 | QDVDVWLWQQEGSSK                | 903.4293  | 2 | 80 | y8     | 40.2  | 120.2 |
| 1760 | IPI00121126.2 | QDVDVWLWQQEGSSK                | 902.9294  | 2 | 81 | y8     | 55.3  | 136.3 |

|      |               |                                  |          |   |    |        |       |       |
|------|---------------|----------------------------------|----------|---|----|--------|-------|-------|
| 1761 | IPI00121126.2 | TGKPNPDQLLK                      | 404.2316 | 3 | 26 | y4     | 18.5  | 44.5  |
| 1762 | IPI00121126.2 | VLEQQQHR                         | 483.7597 | 2 | 45 | y6     | 22.4  | 67.4  |
| 1763 | IPI00121126.2 | VPHSPQR                          | 411.2271 | 2 | 25 | y5     | 6.6   | 31.6  |
| 1764 | IPI00121126.2 | YYVGDTEVDLFEK                    | 789.3723 | 2 | 26 |        | 0     | 26.0  |
| 1765 | IPI00121126.2 | YYVGDTEVDLFEK                    | 789.4177 | 2 | 51 | y4     | 55.9  | 106.9 |
| 1766 | IPI00120382.3 | DDPVTNLNNAFEVAEK                 | 888.4237 | 2 | 56 | c b8   | 5.35  | 61.4  |
| 1767 | IPI00120382.3 | GYEEWLLNEIR                      | 711.8589 | 2 | 48 | y4     | 41    | 89.0  |
| 1768 | IPI00120382.3 | KPER                             | 529.3822 | 1 | 18 |        | 0     | 18.0  |
| 1769 | IPI00120382.3 | MAPYQGPDAAPGALDYK                | 882.9765 | 2 | 41 | y8     | 61.35 | 102.4 |
| 1770 | IPI00120382.3 | QHQLIQEALIFDNK                   | 849.4810 | 2 | 17 |        | 0     | 17.0  |
| 1771 | IPI00120382.3 | TINEVENQILTR                     | 715.4070 | 2 | 59 | y7     | 69.75 | 128.8 |
| 1772 | IPI00117350.1 | AVFVDLEPTVIDEIR                  | 858.4636 | 2 | 65 | P y8   | 69.75 | 134.8 |
| 1773 | IPI00117350.1 | DVNAAIAAIK                       | 493.2874 | 2 | 65 | y6     | 69.75 | 134.8 |
| 1774 | IPI00117350.1 | EIIDPVLDR                        | 535.2983 | 2 | 25 |        | 0     | 25.0  |
| 1775 | IPI00117350.1 | FDLMYAK                          | 444.2204 | 2 | 39 | y5     | 97.85 | 136.9 |
| 1776 | IPI00117350.1 | LISQIVSSITASLR                   | 744.4433 | 2 | 66 | y9     | 20.1  | 86.1  |
| 1777 | IPI00133549.1 | AAVVLENGVLSR                     | 635.3607 | 2 | 61 |        | 0     | 61.0  |
| 1778 | IPI00133549.1 | DFLGGLAFR                        | 498.2696 | 2 | 48 | y6     | 25.35 | 73.4  |
| 1779 | IPI00133549.1 | FANQILSYGAELDADHPGFKDPVYR        | 706.8502 | 4 | 30 | y++15  | 10.05 | 40.1  |
| 1780 | IPI00133549.1 | HGQPIPR                          | 402.7277 | 2 | 39 | y6     | 25.35 | 64.4  |
| 1781 | IPI00133549.1 | LFEENEINLTHIESR                  | 615.6477 | 3 | 44 | y++11  | 30.4  | 74.4  |
| 1782 | IPI00133549.1 | LFEENEINLTHIESRPSR               | 728.7292 | 3 | 36 |        | 0     | 36.0  |
| 1783 | IPI00133549.1 | LFEENEINLTHIESRPSR               | 729.0547 | 3 | 41 |        | 0     | 41.0  |
| 1784 | IPI00133549.1 | LNKDEYEFFTYLDK                   | 609.2963 | 3 | 31 | y5     | 52.95 | 84.0  |
| 1785 | IPI00133549.1 | LRPVAGLLSSR                      | 390.2433 | 3 | 24 | y4     | 16.9  | 40.9  |
| 1786 | IPI00133549.1 | LRPVAGLLSSR                      | 584.8619 | 2 | 35 | P y9   | 52.75 | 87.8  |
| 1787 | IPI00133549.1 | NDIGATVHELDR                     | 656.3388 | 2 | 55 | y9     | 52.75 | 107.8 |
| 1788 | IPI00133549.1 | RSKPVLGSIK                       | 599.3870 | 2 | 36 | c b9   | 2.15  | 38.2  |
| 1789 | IPI00133549.1 | TFAATIPRPFSVR                    | 488.2776 | 3 | 18 | y++12  | 4.95  | 23.0  |
| 1790 | IPI00133549.1 | TFAATIPRPFSVR                    | 731.9255 | 2 | 46 | c b6 P | 1.4   | 47.4  |
| 1791 | IPI00133549.1 | TIQELDRFANQILSYGAELDADHPGFKDPVYR | 920.9613 | 4 | 23 | P y4   | 18.5  | 41.5  |
| 1792 | IPI00133549.1 | TWGTVFR                          | 433.7301 | 2 | 25 | y5     | 29.45 | 54.5  |
| 1793 | IPI00133549.1 | VEYTEEERK                        | 394.8596 | 3 | 20 |        | 0     | 20.0  |
| 1794 | IPI00133549.1 | YDPYTQRVEVLDNTQQLK               | 737.7222 | 3 | 21 | y7     | 13.65 | 34.7  |
| 1795 | IPI00130589.2 | DGVANVSIEDR                      | 587.7882 | 2 | 50 | y5     | 14.55 | 64.6  |
| 1796 | IPI00130589.2 | DGVANVSIEDR                      | 587.7882 | 2 | 58 | y5     | 27.2  | 85.2  |
| 1797 | IPI00130589.2 | DGVANVSIEDRVISLSGEHSIIGR         | 842.1128 | 3 | 41 | y9     | 42.15 | 83.2  |
| 1798 | IPI00130589.2 | DGVANVSIEDRVISLSGEHSIIGR         | 842.1067 | 3 | 41 | y8     | 23.75 | 64.8  |
| 1799 | IPI00130589.2 | GDGPVQGTIHFEQK                   | 504.9198 | 3 | 17 |        | 0     | 17.0  |
| 1800 | IPI00130589.2 | GDGPVQGTIHFEQK                   | 756.8855 | 2 | 47 | y8     | 58.1  | 105.1 |
| 1801 | IPI00130589.2 | GDGPVQGTIHFEQK                   | 756.8855 | 2 | 50 | y5     | 52.95 | 103.0 |

|      |               |                             |           |   |    |       |       |       |
|------|---------------|-----------------------------|-----------|---|----|-------|-------|-------|
| 1802 | IPI00130589.2 | HGGPADEERHVGDLGNVTAGK       | 530.0099  | 4 | 18 |       | 0     | 18.0  |
| 1803 | IPI00130589.2 | HGGPADEERHVGDLGNVTAGK       | 706.3479  | 3 | 23 | y++15 | 29.45 | 52.5  |
| 1804 | IPI00130589.2 | HGGPADEERHVGDLGNVTAGK       | 706.0187  | 3 | 23 | y10   | 30.4  | 53.4  |
| 1805 | IPI00130589.2 | HGGPADEERHVGDLGNVTAGK       | 1059.0746 | 2 | 24 | y8    | 22.4  | 46.4  |
| 1806 | IPI00130589.2 | HGGPADEERHVGDLGNVTAGK       | 529.7595  | 4 | 28 |       | 0     | 28.0  |
| 1807 | IPI00130589.2 | HVGDLGNVTAGK                | 584.3092  | 2 | 42 | y10   | 36.9  | 78.9  |
| 1808 | IPI00130589.2 | HVGDLGNVTAGK                | 389.8755  | 3 | 44 | c b7  | 33.75 | 77.8  |
| 1809 | IPI00130589.2 | KHGGPADEER                  | 365.8441  | 3 | 58 | y4    | 29.45 | 87.5  |
| 1810 | IPI00130589.2 | TMVVHEK                     | 422.2237  | 2 | 39 | y4    | 29.45 | 68.5  |
| 1811 | IPI00130589.2 | VISLSGEHSIIGR               | 456.5933  | 3 | 21 | y++11 | 102.9 | 123.9 |
| 1812 | IPI00130589.2 | VISLSGEHSIIGR               | 684.3884  | 2 | 62 | y9    | 42.15 | 104.2 |
| 1813 | IPI00131438.1 | AINPENGGVAPGTSVK            | 902.9646  | 2 | 34 | y7    | 23.75 | 57.8  |
| 1814 | IPI00131438.1 | AINPENGGVAPGTSVK            | 903.4642  | 2 | 50 | P y6  | 14.55 | 64.6  |
| 1815 | IPI00131438.1 | EIISFGSGYGGNSLLGK           | 849.9398  | 2 | 62 |       | 0     | 62.0  |
| 1816 | IPI00131438.1 | EIISFGSGYGGNSLLGK           | 849.9397  | 2 | 75 | y8    | 12.85 | 87.9  |
| 1817 | IPI00131438.1 | EVEIDRYLEDQVNTDLPYEIER      | 956.7921  | 3 | 52 | P y6  | 49.6  | 101.6 |
| 1818 | IPI00131438.1 | FLWPGFGENS                  | 655.3204  | 2 | 29 | P y8  | 55.3  | 84.3  |
| 1819 | IPI00131438.1 | GLGGVNVVEELFGISK            | 760.4120  | 2 | 36 | y5    | 6.2   | 42.2  |
| 1820 | IPI00131438.1 | TMYVIPFSMGPLGSPLAK          | 955.0032  | 2 | 38 |       | 0     | 38.0  |
| 1821 | IPI00131438.1 | TNLAMMNPSLPGWK              | 780.3869  | 2 | 20 | P y4  | 20.55 | 40.6  |
| 1822 | IPI00131438.1 | VLEWMFGR                    | 519.2664  | 2 | 37 | y6    | 49.6  | 86.6  |
| 1823 | IPI00331241.5 | ADIALVELLYHVEELDPGVVDNFPLLK | 1008.2151 | 3 | 18 |       | 0     | 18.0  |
| 1824 | IPI00331241.5 | ADIALVELLYHVEELDPGVVDNFPLLK | 1008.2103 | 3 | 19 |       | 0     | 19.0  |
| 1825 | IPI00331241.5 | ADIALVELLYHVEELDPGVVDNFPLLK | 1008.2153 | 3 | 21 |       | 0     | 21.0  |
| 1826 | IPI00331241.5 | ADIALVELLYHVEELDPGVVDNFPLLK | 1008.2141 | 3 | 29 | y6    | 29.45 | 58.5  |
| 1827 | IPI00331241.5 | ADIALVELLYHVEELDPGVVDNFPLLK | 1008.2106 | 3 | 31 | y8    | 21.2  | 52.2  |
| 1828 | IPI00331241.5 | ADIALVELLYHVEELDPGVVDNFPLLK | 1008.2104 | 3 | 35 | P y4  | 49.1  | 84.1  |
| 1829 | IPI00331241.5 | ADIALVELLYHVEELDPGVVDNFPLLK | 1008.2102 | 3 | 41 | y8    | 33.75 | 74.8  |
| 1830 | IPI00331241.5 | AGKPVLYHFDGR                | 467.9139  | 3 | 25 | y5    | 38.2  | 63.2  |
| 1831 | IPI00331241.5 | AGKPVLYHFDGR                | 467.9139  | 3 | 36 | y4    | 15.6  | 51.6  |
| 1832 | IPI00331241.5 | AGKPVLYHFDGR                | 701.3747  | 2 | 42 | y6    | 49.6  | 91.6  |
| 1833 | IPI00331241.5 | AILNYIASK                   | 496.7926  | 2 | 22 | y7    | 49.6  | 71.6  |
| 1834 | IPI00331241.5 | AILNYIASK                   | 992.5791  | 1 | 23 |       | 0     | 23.0  |
| 1835 | IPI00331241.5 | AILNYIASK                   | 496.7926  | 2 | 38 | y7    | 65.15 | 103.2 |
| 1836 | IPI00331241.5 | FLQPGSQR                    | 466.7510  | 2 | 36 | P y5  | 15.6  | 51.6  |
| 1837 | IPI00331241.5 | KPFDDAK                     | 410.7136  | 2 | 29 | c b5  | 38.2  | 67.2  |
| 1838 | IPI00331241.5 | LRSDGSLMFQQVPMVEIDGMK       | 794.7252  | 3 | 22 | b8    | 1.4   | 23.4  |
| 1839 | IPI00331241.5 | LRSDGSLMFQQVPMVEIDGMK       | 794.7276  | 3 | 25 |       | 0     | 25.0  |
| 1840 | IPI00331241.5 | LRSDGSLMFQQVPMVEIDGMK       | 1191.5881 | 2 | 35 | y5    | 23.35 | 58.4  |
| 1841 | IPI00331241.5 | LRSDGSLMFQQVPMVEIDGMK       | 1191.5940 | 2 | 40 | c b8  | 5.85  | 45.9  |
| 1842 | IPI00331241.5 | SDGSLMFQQVPMVEIDGMK         | 1056.9937 | 2 | 54 | c b9  | 21.2  | 75.2  |

|      |               |                                 |           |   |    |       |       |       |
|------|---------------|---------------------------------|-----------|---|----|-------|-------|-------|
| 1843 | IPI00331241.5 | SDGSLMFQQVPMVEIDGMK             | 1056.9938 | 2 | 54 | y7    | 15.6  | 69.6  |
| 1844 | IPI00331241.5 | SHGQDYLVGNR                     | 623.3019  | 2 | 48 | y6    | 22.4  | 70.4  |
| 1845 | IPI00331241.5 | VSNLPTVK                        | 857.5307  | 1 | 17 | P y4  | 27.2  | 44.2  |
| 1846 | IPI00331241.5 | VSNLPTVKK                       | 493.3063  | 2 | 42 | y7    | 38.2  | 80.2  |
| 1847 | IPI00331241.5 | VSNLPTVKK                       | 493.3063  | 2 | 44 |       | 0     | 44.0  |
| 1848 | IPI00331241.5 | WLLAAAGVEFEEK                   | 731.8830  | 2 | 57 | y7    | 46.75 | 103.8 |
| 1849 | IPI00331241.5 | YFPAFEK                         | 451.2263  | 2 | 17 | P y5  | 57.05 | 74.1  |
| 1850 | IPI00331241.5 | YNLYGK                          | 757.3915  | 1 | 20 |       | 0     | 20.0  |
| 1851 | IPI00331241.5 | YNLYGK                          | 379.1975  | 2 | 32 | y5    | 38.2  | 70.2  |
| 1852 | IPI00380995.1 | RVIISAPSADAPMFVMGVNHEK          | 790.4341  | 3 | 55 | y8    | 21.2  | 76.2  |
| 1853 | IPI00380995.1 | VVDLMAYMASK                     | 614.3101  | 2 | 72 | y6    | 75.6  | 147.6 |
| 1854 | IPI00272431.2 | RVIISAPSADAPMFVMGVNHEK          | 790.7565  | 3 | 57 | b6 P  | 15.6  | 72.6  |
| 1855 | IPI00272431.2 | VIHDNFGIVEGLMAMVHAITATQK        | 649.6027  | 4 | 17 | b8    | 31.95 | 49.0  |
| 1856 | IPI00272431.2 | VIHDNFGIVEGLMAMVHAITATQK        | 649.8463  | 4 | 20 | y5    | 18.5  | 38.5  |
| 1857 | IPI00272431.2 | VIHDNFGIVEGLMAMVHAITATQK        | 649.8463  | 4 | 25 |       | 0     | 25.0  |
| 1858 | IPI00272431.2 | VIHDNFGIVEGLMAMVHAITATQK        | 649.5972  | 4 | 26 | y++11 | 61.35 | 87.4  |
| 1859 | IPI00272431.2 | VIHDNFGIVEGLMAMVHAITATQK        | 871.4569  | 3 | 28 |       | 0     | 28.0  |
| 1860 | IPI00272431.2 | VIHDNFGIVEGLMAMVHAITATQK        | 650.0987  | 4 | 28 | b8    | 12.85 | 40.9  |
| 1861 | IPI00272431.2 | VIHDNFGIVEGLMAMVHAITATQK        | 649.8480  | 4 | 30 | b8    | 49.6  | 79.6  |
| 1862 | IPI00272431.2 | VIHDNFGIVEGLMAMVHAITATQK        | 649.8460  | 4 | 31 |       | 0     | 31.0  |
| 1863 | IPI00272431.2 | VIHDNFGIVEGLMAMVHAITATQK        | 866.1250  | 3 | 33 |       | 0     | 33.0  |
| 1864 | IPI00272431.2 | VIHDNFGIVEGLMAMVHAITATQK        | 649.8479  | 4 | 34 | b8    | 44.3  | 78.3  |
| 1865 | IPI00272431.2 | VIHDNFGIVEGLMAMVHAITATQK        | 866.1255  | 3 | 39 | y9    | 42.15 | 81.2  |
| 1866 | IPI00272431.2 | VIHDNFGIVEGLMAMVHAITATQK        | 866.1525  | 3 | 42 | y++16 | 43.3  | 85.3  |
| 1867 | IPI00272431.2 | VIHDNFGIVEGLMAMVHAITATQK        | 649.8463  | 4 | 43 | b8    | 61.35 | 104.4 |
| 1868 | IPI00272431.2 | VIHDNFGIVEGLMAMVHAITATQK        | 866.1255  | 3 | 51 | y7    | 22.4  | 73.4  |
| 1869 | IPI00122344.1 | AVAALDGAK                       | 408.2349  | 2 | 27 | y7    | 33.75 | 60.8  |
| 1870 | IPI00122344.1 | AVVLPISLATTFK                   | 680.4334  | 2 | 49 | P y9  | 78.1  | 127.1 |
| 1871 | IPI00122344.1 | AVVLPISLATTFKQDFPGQSSGFEYSR     | 982.8394  | 3 | 39 | y++12 | 18.3  | 57.3  |
| 1872 | IPI00122344.1 | AVVLPISLATTFKQDFPGQSSGFEYSR     | 983.1737  | 3 | 40 | y7    | 12.85 | 52.9  |
| 1873 | IPI00122344.1 | DASLSGFLPSFQHFATQAIHVGQEPEQWNSR | 872.1713  | 4 | 15 | b8 P  | 30.4  | 45.4  |
| 1874 | IPI00122344.1 | DASLSGFLPSFQHFATQAIHVGQEPEQWNSR | 1162.9001 | 3 | 29 |       | 0     | 29.0  |
| 1875 | IPI00122344.1 | DASLSGFLPSFQHFATQAIHVGQEPEQWNSR | 1162.8999 | 3 | 35 | P y7  | 35.8  | 70.8  |
| 1876 | IPI00122344.1 | DRATLGINDTLIR                   | 729.4220  | 2 | 29 | c b9  | 19.15 | 48.2  |
| 1877 | IPI00122344.1 | DRATLGINDTLIR                   | 486.6078  | 3 | 35 | c b7  | 7.7   | 42.7  |
| 1878 | IPI00122344.1 | EFGLK                           | 593.3298  | 1 | 16 |       | 0     | 16.0  |
| 1879 | IPI00122344.1 | FLETNPR                         | 438.7324  | 2 | 43 | y5    | 38.2  | 81.2  |
| 1880 | IPI00122344.1 | GALQHAK                         | 362.7088  | 2 | 26 | y5    | 38.2  | 64.2  |
| 1881 | IPI00122344.1 | LLEAAITPQTK                     | 592.8483  | 2 | 54 | P y4  | 62.3  | 116.3 |
| 1882 | IPI00122344.1 | LSVGLEDEQDLLEDLDR               | 979.9807  | 2 | 44 | y6    | 27.2  | 71.2  |
| 1883 | IPI00122344.1 | LSVGLEDEQDLLEDLDR               | 980.4813  | 2 | 47 | y5    | 25.35 | 72.4  |

|      |               |                                |           |   |    |      |        |       |
|------|---------------|--------------------------------|-----------|---|----|------|--------|-------|
| 1884 | IPI00122344.1 | LSVGLEDEQDLLEDLDR              | 980.4812  | 2 | 55 | y5   | 15.6   | 70.6  |
| 1885 | IPI00122344.1 | LVWIETPTNPTLK                  | 756.4278  | 2 | 25 | P y7 | 33.75  | 58.8  |
| 1886 | IPI00122344.1 | QDFPGQSSGFEYSR                 | 803.3535  | 2 | 67 | y7   | 35.8   | 102.8 |
| 1887 | IPI00122344.1 | RVASEFGLK                      | 503.7875  | 2 | 35 | b5   | 25.35  | 60.4  |
| 1888 | IPI00122344.1 | VASEFGLK                       | 425.7371  | 2 | 23 | y6   | 49.6   | 72.6  |
| 1889 | IPI00379778.1 | MRLSLEQGGAEKMEK                | 840.4413  | 2 | 16 | y7   | 22.4   | 38.4  |
| 1890 | IPI00379778.1 | RVIISAPSADAPMFVMGVNHEK         | 593.3088  | 4 | 26 | b6 P | 38.2   | 64.2  |
| 1891 | IPI00131828.1 | IFNNGADLSGITEENAPLK            | 668.6747  | 3 | 35 | y8   | 20.1   | 55.1  |
| 1892 | IPI00131828.1 | IFNNGADLSGITEENAPLK            | 1002.5085 | 2 | 84 | y8   | 58.1   | 142.1 |
| 1893 | IPI00131828.1 | KLDQDTV FALANYILFK             | 667.0343  | 3 | 26 | y7   | 12.85  | 38.9  |
| 1894 | IPI00131828.1 | MQHLEQTLK                      | 607.8136  | 2 | 47 | y7   | 65.15  | 112.2 |
| 1895 | IPI00131828.1 | RLAQIHFP                       | 379.8929  | 3 | 38 | c b5 | 9.55   | 47.6  |
| 1896 | IPI00403260.1 | TPAGLQVLNDYLADK                | 809.4278  | 2 | 74 | y8   | 31.95  | 106.0 |
| 1897 | IPI00403260.1 | TPAGLQVLNDYLADK                | 809.9318  | 2 | 76 | y7   | 102.45 | 178.5 |
| 1898 | IPI00403260.1 | TPAGLQVLNDYLADK                | 809.4276  | 2 | 92 | y8   | 58.1   | 150.1 |
| 1899 | IPI00126940.1 | AGHYAASVIIR                    | 386.5522  | 3 | 42 | c b5 | 1.05   | 43.1  |
| 1900 | IPI00126940.1 | AGHYAASVIIR                    | 579.3255  | 2 | 66 | y7   | 5.55   | 71.6  |
| 1901 | IPI00126940.1 | DFLDK                          | 637.3183  | 1 | 24 |      | 0      | 24.0  |
| 1902 | IPI00126940.1 | FGEILK                         | 706.4177  | 1 | 25 | c b4 | 41     | 66.0  |
| 1903 | IPI00126940.1 | FGEILK                         | 353.7105  | 2 | 40 | y4   | 44.5   | 84.5  |
| 1904 | IPI00126940.1 | HLDLER                         | 391.7119  | 2 | 28 | y4   | 41     | 69.0  |
| 1905 | IPI00126940.1 | KAQALPK                        | 378.2424  | 2 | 34 | c b5 | 25.35  | 59.4  |
| 1906 | IPI00126940.1 | LKVEAPQALSENVLFGMGNPLLDISAVVDK | 1056.9103 | 3 | 51 | y6   | 41     | 92.0  |
| 1907 | IPI00126940.1 | VAQWLIQEPHK                    | 450.5856  | 3 | 22 |      | 0      | 22.0  |
| 1908 | IPI00126940.1 | VAQWLIQEPHK                    | 450.2513  | 3 | 23 |      | 0      | 23.0  |
| 1909 | IPI00126940.1 | VAQWLIQEPHK                    | 674.8774  | 2 | 48 | y6   | 49.6   | 97.6  |
| 1910 | IPI00126940.1 | VEAPQALSENVLFGMGNPLLDISAVVDK   | 976.5131  | 3 | 41 |      | 0      | 41.0  |
| 1911 | IPI00126940.1 | VEAPQALSENVLFGMGNPLLDISAVVDK   | 976.5134  | 3 | 43 | b7   | 5.55   | 48.6  |
| 1912 | IPI00126940.1 | VEYHAGGSTQNSMK                 | 503.5655  | 3 | 21 | y5   | 25.35  | 46.4  |
| 1913 | IPI00126940.1 | VEYHAGGSTQNSMK                 | 754.8436  | 2 | 38 | y9   | 28.95  | 67.0  |
| 1914 | IPI00126940.1 | VFTLNLSAPFISQFFK               | 620.3410  | 3 | 34 | y5   | 62.3   | 96.3  |
| 1915 | IPI00126940.1 | VFTLNLSAPFISQFFK               | 930.5124  | 2 | 39 | y5   | 57.05  | 96.1  |
| 1916 | IPI00126940.1 | VFTLNLSAPFISQFFK               | 930.5127  | 2 | 67 |      | 0      | 67.0  |
| 1917 | IPI00126940.1 | YSLKPNDQILAEDK                 | 817.4409  | 2 | 46 |      | 0      | 46.0  |
| 1918 | IPI00112719.1 | AGADIITYFAPQLLK                | 867.4953  | 2 | 58 | y6   | 38.2   | 96.2  |
| 1919 | IPI00112719.1 | DAAQSSPAFGDRR                  | 689.3281  | 2 | 29 |      | 0      | 29.0  |
| 1920 | IPI00112719.1 | DEQGSAAEDSPTSIEAVR             | 989.5209  | 2 | 51 | y4   | 41     | 92.0  |
| 1921 | IPI00112719.1 | DEQGSAAEDSPTSIEAVR             | 988.9393  | 2 | 77 | P y7 | 46.75  | 123.8 |
| 1922 | IPI00112719.1 | LAEVALAYAK                     | 524.8057  | 2 | 43 | y8   | 44.3   | 87.3  |
| 1923 | IPI00112719.1 | MHHQSVLHSGYFHPLLR              | 421.0167  | 5 | 21 |      | 0      | 21.0  |
| 1924 | IPI00112719.1 | RAGADIITYFAPQLLK               | 630.7111  | 3 | 33 | P y5 | 38.2   | 71.2  |

|      |               |                             |           |   |    |        |       |       |
|------|---------------|-----------------------------|-----------|---|----|--------|-------|-------|
| 1925 | IPI00112719.1 | VSVMSYSAK                   | 486.2468  | 2 | 31 | y6     | 57.05 | 88.1  |
| 1926 | IPI00112719.1 | YGVNQLEEMLRPLVEAGLR         | 729.7226  | 3 | 17 |        | 0     | 17.0  |
| 1927 | IPI00112719.1 | YGVNQLEEMLRPLVEAGLR         | 730.0580  | 3 | 46 |        | 0     | 46.0  |
| 1928 | IPI00112719.1 | YGVNQLEEMLRPLVEAGLR         | 730.0605  | 3 | 47 | P y8   | 30.4  | 77.4  |
| 1929 | IPI00406478.1 | ATLELTHNWGTEDDETQSYHNGNSDPR | 1030.1178 | 3 | 20 |        | 0     | 20.0  |
| 1930 | IPI00406478.1 | DFLLQQTMLR                  | 632.8410  | 2 | 55 | y7     | 23.75 | 78.8  |
| 1931 | IPI00406478.1 | FSLYFLAYEDKNDIPK            | 655.3542  | 3 | 25 | y++12  | 78.1  | 103.1 |
| 1932 | IPI00406478.1 | GLAFIQDPDGYWIEILNPNK        | 1152.5891 | 2 | 65 | y7     | 35.8  | 100.8 |
| 1933 | IPI00406478.1 | GLAFIQDPDGYWIEILNPNK        | 1152.5889 | 2 | 68 |        | 0     | 68.0  |
| 1934 | IPI00406478.1 | GLAFIQDPDGYWIEILNPNK        | 1152.5894 | 2 | 71 |        | 0     | 71.0  |
| 1935 | IPI00406478.1 | LDFPAMK                     | 411.2149  | 2 | 29 | y6     | 49.6  | 78.6  |
| 1936 | IPI00406478.1 | SLDFYTR                     | 451.2248  | 2 | 20 | y5     | 69.75 | 89.8  |
| 1937 | IPI00406478.1 | TAWTFSR                     | 434.7194  | 2 | 16 | y5     | 38.2  | 54.2  |
| 1938 | IPI00396707.1 | ELDQDTV FALANYILFK          | 667.3687  | 3 | 21 |        | 0     | 21.0  |
| 1939 | IPI00396707.1 | ELDQDTV FALANYILFK          | 1001.0250 | 2 | 46 | y8     | 5.35  | 51.4  |
| 1940 | IPI00396707.1 | ELDQDTV FALANYILFK          | 1001.0297 | 2 | 47 | y6     | 89    | 136.0 |
| 1941 | IPI00396707.1 | ELDQDTV FALANYILFK          | 1000.5517 | 2 | 68 | y8     | 31.95 | 100.0 |
| 1942 | IPI00396707.1 | ELDQDTV FALANYILFK          | 1000.5480 | 2 | 89 |        | 0     | 89.0  |
| 1943 | IPI00396707.1 | LSKAVHK                     | 391.7297  | 2 | 20 | y5     | 44.5  | 64.5  |
| 1944 | IPI00123924.1 | ATVLQVATYSMPPIVR            | 881.4481  | 2 | 15 |        | 0     | 15.0  |
| 1945 | IPI00137409.2 | DAIVQAVK                    | 422.2508  | 2 | 26 |        | 0     | 26.0  |
| 1946 | IPI00137409.2 | GHAAPILYAVWAEAGFLPEAELNLRK  | 738.4083  | 4 | 17 |        | 0     | 17.0  |
| 1947 | IPI00137409.2 | HQPTAIIAK                   | 489.7904  | 2 | 20 | P y7   | 49.6  | 69.6  |
| 1948 | IPI00137409.2 | IIALDGDTK                   | 473.2668  | 2 | 29 | y7     | 61.35 | 90.4  |
| 1949 | IPI00137409.2 | LDNLVAIFDINR                | 701.8881  | 2 | 54 | y7     | 22.4  | 76.4  |
| 1950 | IPI00137409.2 | LGQSDPAPLQH QVDIYQK         | 680.0266  | 3 | 15 | b5 P   | 15.6  | 30.6  |
| 1951 | IPI00137409.2 | NMAEQIIQEIYSQVQSK           | 671.3886  | 3 | 17 | y7     | 65.15 | 82.2  |
| 1952 | IPI00137409.2 | NMAEQIIQEIYSQVQSK           | 670.6717  | 3 | 37 | y7     | 49.6  | 86.6  |
| 1953 | IPI00137409.2 | NMAEQIIQEIYSQVQSK           | 670.3388  | 3 | 52 | y7     | 52.95 | 105.0 |
| 1954 | IPI00137409.2 | NMAEQIIQEIYSQVQSK           | 1005.0048 | 2 | 54 | y6     | 49.6  | 103.6 |
| 1955 | IPI00137409.2 | NMAEQIIQEIYSQVQSK           | 1005.5067 | 2 | 58 | y6     | 52.95 | 111.0 |
| 1956 | IPI00137409.2 | NMAEQIIQEIYSQVQSK           | 1005.5064 | 2 | 68 | y7     | 49.6  | 117.6 |
| 1957 | IPI00137409.2 | TSRPENAIYSNNEDFQVVGQAK      | 827.7671  | 3 | 29 |        | 0     | 29.0  |
| 1958 | IPI00128434.1 | AFEEEEQALR                  | 546.7694  | 2 | 56 | y6     | 13.65 | 69.7  |
| 1959 | IPI00128434.1 | EMGDHLVK                    | 464.7320  | 2 | 16 |        | 0     | 16.0  |
| 1960 | IPI00128434.1 | EVVSHVIK                    | 455.7715  | 2 | 18 |        | 0     | 18.0  |
| 1961 | IPI00128434.1 | FAVLQTYGDTTHTLVEK           | 641.6680  | 3 | 22 | y++10  | 6.6   | 28.6  |
| 1962 | IPI00128434.1 | FAVLQTYGDTTHTLVEK           | 642.0049  | 3 | 29 | y++14  | 56.75 | 85.8  |
| 1963 | IPI00128434.1 | FLHFHSVTFWVGNAK             | 597.3258  | 3 | 32 | y6     | 23.75 | 55.8  |
| 1964 | IPI00128434.1 | FLPGFEAPTYK                 | 635.3431  | 2 | 17 | c b7 P | 5.85  | 22.9  |
| 1965 | IPI00128434.1 | GTEFLAAPSSYYK               | 717.3629  | 2 | 29 | P y6   | 52.95 | 82.0  |



|      |               |                               |           |   |    |        |        |       |
|------|---------------|-------------------------------|-----------|---|----|--------|--------|-------|
| 1966 | IPI00128434.1 | HNHQGFGAGNFNSLFK              | 592.2850  | 3 | 49 |        | 0      | 49.0  |
| 1967 | IPI00128434.1 | HNHQGFGAGNFNSLFK              | 888.4270  | 2 | 58 | c b4   | 7.7    | 65.7  |
| 1968 | IPI00128434.1 | IVREPWVEQDK                   | 467.2534  | 3 | 18 | y5     | 52.95  | 71.0  |
| 1969 | IPI00128434.1 | IVREPWVEQDK                   | 466.9174  | 3 | 19 | y5     | 25.35  | 44.4  |
| 1970 | IPI00128434.1 | IVREPWVEQDK                   | 699.8783  | 2 | 40 |        | 0      | 40.0  |
| 1971 | IPI00128434.1 | MGFEPLAYR                     | 542.2728  | 2 | 45 | P y5   | 89     | 134.0 |
| 1972 | IPI00128434.1 | NLQFHR                        | 407.7196  | 2 | 26 |        | 0      | 26.0  |
| 1973 | IPI00128434.1 | SIVVTNYEESIK                  | 691.3659  | 2 | 73 | y7     | 102.45 | 175.5 |
| 1974 | IPI00128434.1 | SQIQEYVDYNGGAGVQHIALK         | 764.3872  | 3 | 28 |        | 0      | 28.0  |
| 1975 | IPI00128434.1 | TEDIITAIR                     | 516.2909  | 2 | 51 | y7     | 77.6   | 128.6 |
| 1976 | IPI00118384.1 | AAFDDAIAELDTLSEESYKDSTLIMQLLR | 1087.2085 | 3 | 59 | y5     | 38.2   | 97.2  |
| 1977 | IPI00118384.1 | DNLTLWTSDMQGDGEEQNK           | 1091.4776 | 2 | 67 | y8     | 21.2   | 88.2  |
| 1978 | IPI00118384.1 | EAAENSLVAYK                   | 597.8040  | 2 | 43 | y7     | 61.35  | 104.4 |
| 1979 | IPI00118384.1 | LAEQAERYDEMVESMKK             | 686.6658  | 3 | 18 | y5     | 29.45  | 47.5  |
| 1980 | IPI00118384.1 | LAEQAERYDEMVESMKK             | 686.3377  | 3 | 42 | y7     | 23.75  | 65.8  |
| 1981 | IPI00118384.1 | MDDREDLVYQAK                  | 762.8537  | 2 | 41 | y6     | 38.2   | 79.2  |
| 1982 | IPI00118384.1 | MKGDYHR                       | 453.7167  | 2 | 35 | y5     | 16.9   | 51.9  |
| 1983 | IPI00118384.1 | YLAEFATGNDRK                  | 692.8483  | 2 | 38 | y7     | 23.75  | 61.8  |
| 1984 | IPI00111218.1 | TFVQENVYDEFVER                | 888.4220  | 2 | 76 | c b7   | 29.45  | 105.5 |
| 1985 | IPI00111218.1 | VAEQTPLTALYVANLIK             | 923.0312  | 2 | 58 | y7     | 33.75  | 91.8  |
| 1986 | IPI00111218.1 | VAEQTPLTALYVANLIK             | 922.5341  | 2 | 64 |        | 0      | 64.0  |
| 1987 | IPI00230034.3 | FFPLEAWQIGK                   | 668.8663  | 2 | 17 | y7     | 65.15  | 82.2  |
| 1988 | IPI00230034.3 | FFPLEAWQIGK                   | 668.3627  | 2 | 27 | y5     | 57.05  | 84.1  |
| 1989 | IPI00230034.3 | FFPLEAWQIGK                   | 668.3627  | 2 | 42 | y7     | 23.75  | 65.8  |
| 1990 | IPI00230034.3 | FFPLEAWQIGK                   | 668.3578  | 2 | 53 | y5     | 38.2   | 91.2  |
| 1991 | IPI00230034.3 | FLTEELSLDQDRIVIR              | 974.5306  | 2 | 21 | y7     | 41     | 62.0  |
| 1992 | IPI00230034.3 | FLTEELSLDQDRIVIR              | 650.0268  | 3 | 22 |        | 0      | 22.0  |
| 1993 | IPI00230034.3 | FLTEELSLDQDRIVIR              | 974.5310  | 2 | 23 | y7     | 27.2   | 50.2  |
| 1994 | IPI00230034.3 | FLTEELSLDQDRIVIR              | 649.6948  | 3 | 48 |        | 0      | 48.0  |
| 1995 | IPI00230034.3 | IPAGLENR                      | 435.2457  | 2 | 48 | y5     | 16.9   | 64.9  |
| 1996 | IPI00230034.3 | IPAGLENR                      | 435.2457  | 2 | 48 | y6     | 25.35  | 73.4  |
| 1997 | IPI00230034.3 | KGTVMTFL                      | 896.5345  | 1 | 25 | b7     | 5.55   | 30.6  |
| 1998 | IPI00230034.3 | KGTVMTFL                      | 448.7493  | 2 | 38 | b6     | 15.6   | 53.6  |
| 1999 | IPI00230034.3 | VSVTIRPGMTLLMNK               | 554.3157  | 3 | 18 |        | 0      | 18.0  |
| 2000 | IPI00230034.3 | VSVTIRPGMTLLMNK               | 553.9810  | 3 | 18 |        | 0      | 18.0  |
| 2001 | IPI00400050.1 | QGWLMEVTDLSLDR                | 775.3700  | 2 | 47 | y6     | 5.85   | 52.9  |
| 2002 | IPI00227822.4 | ALEVLVAK                      | 842.5604  | 1 | 35 | b6     | 7.1    | 42.1  |
| 2003 | IPI00227822.4 | ALEVLVAK                      | 421.7709  | 2 | 40 | y6     | 116    | 156.0 |
| 2004 | IPI00227822.4 | ALGLSNFNSR                    | 539.7865  | 2 | 33 | y6     | 27.2   | 60.2  |
| 2005 | IPI00227822.4 | AVPREELFVTSK                  | 688.3874  | 2 | 30 | c b8   | 46.75  | 76.8  |
| 2006 | IPI00227822.4 | AWRHPDEPVLLEEPVVLALAEK        | 628.5953  | 4 | 40 | P y++9 | 75.6   | 115.6 |

|      |               |                                  |           |   |     |        |       |       |
|------|---------------|----------------------------------|-----------|---|-----|--------|-------|-------|
| 2007 | IPI00227822.4 | HALSAGYR                         | 437.7306  | 2 | 29  | y6     | 23.75 | 52.8  |
| 2008 | IPI00227822.4 | HPEDVEPALRK                      | 476.5847  | 3 | 18  | P y5   | 16.9  | 34.9  |
| 2009 | IPI00227822.4 | ILQNIQVDFDFTFSPEEMK              | 1094.0525 | 2 | 20  |        | 0     | 20.0  |
| 2010 | IPI00227822.4 | ILQNIQVDFDFTFSPEEMK              | 1094.0471 | 2 | 60  | y6     | 69.75 | 129.8 |
| 2011 | IPI00227822.4 | ILQNIQVDFDFTFSPEEMK              | 1094.0468 | 2 | 66  | P y5   | 69.75 | 135.8 |
| 2012 | IPI00227822.4 | MPLIGLGTWK                       | 558.3174  | 2 | 34  | y6     | 57.05 | 91.1  |
| 2013 | IPI00227822.4 | SPAQILLR                         | 449.2796  | 2 | 60  |        | 0     | 60.0  |
| 2014 | IPI00227822.4 | TASSVLLHTGQK                     | 642.3523  | 2 | 56  | y5     | 57.05 | 113.1 |
| 2015 | IPI00227822.4 | TLADLQLEYLDLYLMHWPYAFER          | 967.8204  | 3 | 24  |        | 0     | 24.0  |
| 2016 | IPI00227822.4 | TLADLQLEYLDLYLMHWPYAFER          | 967.8203  | 3 | 25  | y++14  | 9.65  | 34.7  |
| 2017 | IPI00121280.2 | DFIAR                            | 621.3355  | 1 | 22  | y4     | 57.05 | 79.1  |
| 2018 | IPI00121280.2 | FKLGLDFPNLPYLIDGSHK              | 725.7274  | 3 | 41  | y6     | 15.6  | 56.6  |
| 2019 | IPI00121280.2 | GLAHAIR                          | 369.2247  | 2 | 30  | y4     | 62.3  | 92.3  |
| 2020 | IPI00121280.2 | LGLDFPNLPYLIDGSHK                | 950.5054  | 2 | 38  | c b5 P | 7.7   | 45.7  |
| 2021 | IPI00121280.2 | SQWLNEK                          | 452.7299  | 2 | 21  | y5     | 75.6  | 96.6  |
| 2022 | IPI00120457.1 | ELGHPEIGDAIAR                    | 689.3594  | 2 | 30  | P y9   | 52.75 | 82.8  |
| 2023 | IPI00120457.1 | EVLEYNALGGK                      | 596.8143  | 2 | 49  | y7     | 77.6  | 126.6 |
| 2024 | IPI00120457.1 | GLTVVQAFQELVEPK                  | 829.9644  | 2 | 35  | y4     | 15.6  | 50.6  |
| 2025 | IPI00120457.1 | GLTVVQAFQELVEPK                  | 829.4610  | 2 | 53  | y4     | 15.6  | 68.6  |
| 2026 | IPI00120457.1 | PGIGLDAINDALLLEASIYR             | 1058.0777 | 2 | 102 | c b9   | 11.55 | 113.6 |
| 2027 | IPI00120457.1 | QILEENYGQKDPEK                   | 564.2815  | 3 | 21  |        | 0     | 21.0  |
| 2028 | IPI00120457.1 | QILEENYGQKDPEK                   | 845.9458  | 2 | 34  | y7     | 46.75 | 80.8  |
| 2029 | IPI00120457.1 | SIVKYK                           | 369.2132  | 2 | 19  | y4     | 7.1   | 26.1  |
| 2030 | IPI00317902.1 | DAYS GGAVNLYHVR                  | 761.3892  | 2 | 67  | y4     | 41    | 108.0 |
| 2031 | IPI00317902.1 | GMGLSMGTMI                       | 515.2577  | 2 | 22  |        | 0     | 22.0  |
| 2032 | IPI00317902.1 | LLANMVYQYK                       | 621.8362  | 2 | 72  | y5     | 75.6  | 147.6 |
| 2033 | IPI00135857.2 | SMARKAVCMLKGDGPVQGT              | 689.0278  | 3 | 15  |        | 0     | 15.0  |
| 2034 | IPI00230185.3 | ANTIGISLIK                       | 515.3191  | 2 | 44  | y4     | 57.05 | 101.1 |
| 2035 | IPI00230185.3 | DLMQTPNFR                        | 561.2746  | 2 | 31  | P y4   | 41    | 72.0  |
| 2036 | IPI00230185.3 | DPAQGQLLK                        | 485.2718  | 2 | 24  | y5     | 57.05 | 81.1  |
| 2037 | IPI00230185.3 | ELHSILQHK                        | 552.8120  | 2 | 36  |        | 0     | 36.0  |
| 2038 | IPI00230185.3 | GLVDKFPLFTAVYK                   | 533.3045  | 3 | 26  |        | 0     | 26.0  |
| 2039 | IPI00230185.3 | ILQHK                            | 320.1949  | 2 | 23  |        | 0     | 23.0  |
| 2040 | IPI00230185.3 | IVGSNAGR                         | 387.2168  | 2 | 43  | y6     | 25.35 | 68.4  |
| 2041 | IPI00230185.3 | KLTEIINTQHENVK                   | 556.3080  | 3 | 28  | y5     | 49.1  | 77.1  |
| 2042 | IPI00230185.3 | LGIPMSVLMGANIASEVAEEK            | 1080.5596 | 2 | 50  | c b9   | 11    | 61.0  |
| 2043 | IPI00230185.3 | LGLMEMIAFAK                      | 612.3301  | 2 | 80  | y7     | 65.15 | 145.2 |
| 2044 | IPI00230185.3 | LISEVIGER                        | 508.2926  | 2 | 42  | y7     | 46.75 | 88.8  |
| 2045 | IPI00230185.3 | LPPNVVAIPDVVQAATGADILVFVVPHQFIGK | 1109.2958 | 3 | 26  | P y7   | 65.15 | 91.2  |
| 2046 | IPI00230185.3 | LTEIINTQHENVK                    | 513.6112  | 3 | 18  |        | 0     | 18.0  |
| 2047 | IPI00230185.3 | LTEIINTQHENVK                    | 769.9201  | 2 | 76  | y8     | 58.1  | 134.1 |

|      |               |                              |           |   |    |       |       |       |
|------|---------------|------------------------------|-----------|---|----|-------|-------|-------|
| 2048 | IPI00126636.2 | FNGTVK                       | 333.1844  | 2 | 24 | y5    | 44.5  | 68.5  |
| 2049 | IPI00126636.2 | VEIVAINDPFIDLNYMVFYQDSTHGK   | 1108.8645 | 3 | 25 | b6    | 16.9  | 41.9  |
| 2050 | IPI00134746.2 | APNSPDVLEIEFKK               | 793.9439  | 2 | 55 | y++12 | 12.15 | 67.2  |
| 2051 | IPI00134746.2 | EFVEEFIWPAVQSSALYEDR         | 806.0560  | 3 | 15 | b7    | 35.8  | 50.8  |
| 2052 | IPI00134746.2 | EQGYDVIAYLANIGQK             | 891.9565  | 2 | 40 | y9    | 50.5  | 90.5  |
| 2053 | IPI00134746.2 | EQGYDVIAYLANIGQK             | 594.6511  | 3 | 43 | y6    | 49.6  | 92.6  |
| 2054 | IPI00134746.2 | EQGYDVIAYLANIGQK             | 594.6405  | 3 | 47 | y6    | 65.15 | 112.2 |
| 2055 | IPI00134746.2 | EQGYDVIAYLANIGQK             | 891.9573  | 2 | 64 | y8    | 44.3  | 108.3 |
| 2056 | IPI00134746.2 | GQVYILGR                     | 453.2643  | 2 | 26 | y6    | 46.75 | 72.8  |
| 2057 | IPI00134746.2 | GQVYILGR                     | 905.5650  | 1 | 27 |       | 0     | 27.0  |
| 2058 | IPI00134746.2 | GRNDLMEYAK                   | 399.5294  | 3 | 31 | y5    | 69.75 | 100.8 |
| 2059 | IPI00134746.2 | GRNDLMEYAK                   | 598.7907  | 2 | 34 | c b7  | 35.8  | 69.8  |
| 2060 | IPI00134746.2 | IDIVENR                      | 429.7381  | 2 | 46 | y4    | 27.2  | 73.2  |
| 2061 | IPI00134746.2 | KVFIEDVSK                    | 355.5376  | 3 | 30 | c b4  | 16.9  | 46.9  |
| 2062 | IPI00134746.2 | KVFIEDVSK                    | 532.8033  | 2 | 31 | y7    | 61.35 | 92.4  |
| 2063 | IPI00134746.2 | MPEFYNR                      | 478.7188  | 2 | 34 | P y6  | 57.05 | 91.1  |
| 2064 | IPI00134746.2 | NQAPPLYTK                    | 544.7910  | 2 | 37 | P y7  | 69.75 | 106.8 |
| 2065 | IPI00134746.2 | QGLGLK                       | 308.1948  | 2 | 33 |       | 0     | 33.0  |
| 2066 | IPI00134746.2 | SPWSMDENLMHISYEAGILENPK      | 888.0831  | 3 | 25 | y7    | 46.75 | 71.8  |
| 2067 | IPI00134746.2 | SPWSMDENLMHISYEAGILENPK      | 888.0837  | 3 | 34 | y7    | 61.35 | 95.4  |
| 2068 | IPI00134746.2 | VFIEDVSK                     | 468.7562  | 2 | 27 | y6    | 95.65 | 122.7 |
| 2069 | IPI00134746.2 | VQVSVFK                      | 403.7424  | 2 | 25 | y5    | 75.6  | 100.6 |
| 2070 | IPI00134746.2 | VQVSVFK                      | 806.4850  | 1 | 27 | y4    | 57.05 | 84.1  |
| 2071 | IPI00315429.2 | ALMDEVVK                     | 920.4771  | 1 | 28 |       | 0     | 28.0  |
| 2072 | IPI00315429.2 | SLELLEGKILPGVEALSNM          | 508.2801  | 4 | 17 |       | 0     | 17.0  |
| 2073 | IPI00128857.1 | AIVVTDGER                    | 480.2620  | 2 | 28 | y6    | 25.35 | 53.4  |
| 2074 | IPI00128857.1 | GHIASVLNAWPEDEVVK            | 867.9586  | 2 | 54 | P y6  | 82.65 | 136.7 |
| 2075 | IPI00128857.1 | GHIASVLNAWPEDEVVK            | 867.9612  | 2 | 58 | P y6  | 125.8 | 183.8 |
| 2076 | IPI00128857.1 | LFYSVLMSDVEK                 | 715.8757  | 2 | 76 | y7    | 95.65 | 171.7 |
| 2077 | IPI00128857.1 | LSDQTVLFQGAGEAALGIAHLVVMAMEK | 967.5046  | 3 | 26 | b6    | 13.65 | 39.7  |
| 2078 | IPI00128857.1 | LSDQTVLFQGAGEAALGIAHLVVMAMEK | 967.5090  | 3 | 45 |       | 0     | 45.0  |
| 2079 | IPI00341613.2 | PAKXDDIKK                    | 531.2924  | 2 | 20 |       | 0     | 20.0  |
| 2080 | IPI00341613.2 | RVISAPSANAPMFVMGVNHXX        | 593.3089  | 4 | 20 | b6 P  | 25.35 | 45.4  |
| 2081 | IPI00228820.3 | KKPEYLEGLPEK                 | 477.6012  | 3 | 19 | y5    | 29.45 | 48.5  |
| 2082 | IPI00228820.3 | KKPEYLEGLPEK                 | 715.9035  | 2 | 22 |       | 0     | 22.0  |
| 2083 | IPI00228820.3 | KPIFAKMAFWNPK                | 789.4438  | 2 | 15 | y7    | 49.6  | 64.6  |
| 2084 | IPI00228820.3 | KPIFAKMAFWNPK                | 789.4328  | 2 | 21 |       | 0     | 21.0  |
| 2085 | IPI00228633.3 | EFGIDPQNMFEFWDVVGGR          | 1166.0231 | 2 | 62 | y6    | 13.65 | 75.7  |
| 2086 | IPI00228633.3 | EVMQMLVELAK                  | 645.8439  | 2 | 58 | y4    | 57.05 | 115.1 |
| 2087 | IPI00228633.3 | GKLPEEARK                    | 343.2015  | 3 | 33 | c b5  | 7.7   | 40.7  |
| 2088 | IPI00228633.3 | HFVALSTNTAK                  | 594.8225  | 2 | 39 | y9    | 40.2  | 79.2  |

|      |               |                          |          |   |    |       |       |       |
|------|---------------|--------------------------|----------|---|----|-------|-------|-------|
| 2089 | IPI00228633.3 | ILLANFLAQTEALMK          | 559.6538 | 3 | 27 |       | 0     | 27.0  |
| 2090 | IPI00228633.3 | ILLANFLAQTEALMK          | 838.4768 | 2 | 64 | y8    | 30.4  | 94.4  |
| 2091 | IPI00228633.3 | LTPFILGALIAMYEHK         | 606.3397 | 3 | 19 | y++13 | 11    | 30.0  |
| 2092 | IPI00228633.3 | TLASLSPETSLFIIASK        | 889.5005 | 2 | 60 |       | 0     | 60.0  |
| 2093 | IPI00228633.3 | VFEGNRPTNSIVFTK          | 570.6410 | 3 | 17 |       | 0     | 17.0  |
| 2094 | IPI00126194.1 | AINY LISGYQR             | 649.3544 | 2 | 55 | y4    | 57.05 | 112.1 |
| 2095 | IPI00126194.1 | APFALQVNTLPLNFDK         | 894.9888 | 2 | 49 | P y6  | 69.75 | 118.8 |
| 2096 | IPI00126194.1 | GGGNTPGNTWLTAFVLK        | 867.0169 | 2 | 52 |       | 0     | 52.0  |
| 2097 | IPI00126194.1 | GGGNTPGNTWLTAFVLK        | 866.9573 | 2 | 57 |       | 0     | 57.0  |
| 2098 | IPI00126194.1 | LLTDQAVDK                | 501.7765 | 2 | 50 | y7    | 82.65 | 132.7 |
| 2099 | IPI00126194.1 | LNETQQLTEAIKSK           | 802.4504 | 2 | 16 | c b8  | 1.95  | 18.0  |
| 2100 | IPI00126194.1 | QQNSDGGLLLTQDVTVALQALSK  | 802.0691 | 3 | 19 | y8    | 73.4  | 92.4  |
| 2101 | IPI00126194.1 | SVIVEPEGIEK              | 600.3302 | 2 | 29 | P y6  | 61.35 | 90.4  |
| 2102 | IPI00126194.1 | TFHVNSGNR                | 516.2553 | 2 | 18 | y6    | 25.35 | 43.4  |
| 2103 | IPI00126194.1 | TVQGAFFGVPVYK            | 707.3837 | 2 | 40 | P y4  | 75.6  | 115.6 |
| 2104 | IPI00126194.1 | VNTNYRPLPFSGQVLLVDEK     | 783.0879 | 3 | 20 |       | 0     | 20.0  |
| 2105 | IPI00126194.1 | VNTNYRPLPFSGQVLLVDEK     | 783.0882 | 3 | 23 |       | 0     | 23.0  |
| 2106 | IPI00221528.1 | VAPDEHPILLTEAPLNPK       | 652.0258 | 3 | 22 | P y5  | 97.85 | 119.9 |
| 2107 | IPI00221528.1 | VAPDEHPILLTEAPLNPK       | 652.0353 | 3 | 32 | P y5  | 89    | 121.0 |
| 2108 | IPI00221528.1 | VDELTA LVV               | 537.2954 | 2 | 21 |       | 0     | 21.0  |
| 2109 | IPI00118676.3 | ATQALVLAPTR              | 570.8407 | 2 | 42 | y4    | 16.9  | 58.9  |
| 2110 | IPI00118676.3 | GIYAYGFEK                | 524.2608 | 2 | 20 | y7    | 46.75 | 66.8  |
| 2111 | IPI00118676.3 | GYDVIAQAQSGTGK           | 697.8578 | 2 | 91 | y9    | 66.55 | 157.6 |
| 2112 | IPI00118676.3 | LNSNTQVVLLSATMPSDVLEVTKK | 863.4742 | 3 | 40 |       | 0     | 40.0  |
| 2113 | IPI00118676.3 | MFVLDEADEMLSR            | 778.3611 | 2 | 47 | y6    | 65.15 | 112.2 |
| 2114 | IPI00118676.3 | PSAIQQR                  | 400.2250 | 2 | 35 | y5    | 15.6  | 50.6  |
| 2115 | IPI00118676.3 | TLRDIETFYNTSIEEMPLNVADLI | 933.8080 | 3 | 29 |       | 0     | 29.0  |
| 2116 | IPI00118676.3 | TLRDIETFYNTSIEEMPLNVADLI | 933.4709 | 3 | 43 | c b8  | 12.15 | 55.2  |
| 2117 | IPI00110684.1 | AAPFTLEYR                | 534.2796 | 2 | 16 |       | 0     | 16.0  |
| 2118 | IPI00110684.1 | DFAVDI IK                | 460.7585 | 2 | 25 | y6    | 69.75 | 94.8  |
| 2119 | IPI00110684.1 | DVFH MVVEVPR             | 443.2327 | 3 | 46 | y4    | 29.45 | 75.5  |
| 2120 | IPI00110684.1 | SGFSSEER                 | 940.4219 | 1 | 40 |       | 0     | 40.0  |
| 2121 | IPI00110684.1 | STHDYWK                  | 468.7139 | 2 | 28 | y5    | 41    | 69.0  |
| 2122 | IPI00110684.1 | VLGILAMIDEGETDWK         | 895.4588 | 2 | 96 | y8    | 61.35 | 157.4 |
| 2123 | IPI00221797.1 | ISGIGSGF                 | 737.4214 | 1 | 17 |       | 0     | 17.0  |
| 2124 | IPI00131803.1 | FKVETFR                  | 463.7583 | 2 | 28 | y4    | 29.45 | 57.5  |
| 2125 | IPI00131803.1 | FREWHHFLVVNMK            | 436.4794 | 4 | 18 | y4    | 62.3  | 80.3  |
| 2126 | IPI00131803.1 | FREWHHFLVVNMK            | 581.9743 | 3 | 18 | c b5  | 25.35 | 43.4  |
| 2127 | IPI00131803.1 | FREWHHFLVVNMK            | 436.7300 | 4 | 20 | y4    | 62.3  | 82.3  |
| 2128 | IPI00131803.1 | FREWHHFLVVNMK            | 581.6365 | 3 | 23 | c b5  | 25.35 | 48.4  |
| 2129 | IPI00131803.1 | FREWHHFLVVNMK            | 871.9503 | 2 | 48 | c b5  | 14.55 | 62.6  |

|      |               |                                          |           |   |    |        |        |       |
|------|---------------|------------------------------------------|-----------|---|----|--------|--------|-------|
| 2130 | IPI00131803.1 | GNDISSGTVLSDYVVGSGPPSGTGLHR              | 844.4102  | 3 | 37 |        | 0      | 37.0  |
| 2131 | IPI00131803.1 | GNDISSGTVLSDYVVGSGPPSGTGLHR              | 844.4100  | 3 | 45 | y10    | 26.5   | 71.5  |
| 2132 | IPI00131803.1 | LYEQLSGK                                 | 469.2533  | 2 | 45 | y6     | 49.6   | 94.6  |
| 2133 | IPI00131803.1 | LYEQLSGK                                 | 937.5422  | 1 | 46 |        | 0      | 46.0  |
| 2134 | IPI00131803.1 | LYTLVLTPNAPSR                            | 780.9468  | 2 | 42 |        | 0      | 42.0  |
| 2135 | IPI00131803.1 | LYTLVLTPNAPSRKDPK                        | 677.0475  | 3 | 19 |        | 0      | 19.0  |
| 2136 | IPI00131803.1 | VDYAGVTVDELGK                            | 683.3489  | 2 | 54 | y7     | 49.6   | 103.6 |
| 2137 | IPI00131803.1 | VDYAGVTVDELGK                            | 683.3489  | 2 | 61 | y7     | 82.65  | 143.7 |
| 2138 | IPI00131803.1 | VLTPQVMNRPSSISWDGLDPGK                   | 833.7634  | 3 | 15 | c b9   | 13.65  | 28.7  |
| 2139 | IPI00131803.1 | VLTPQVMNRPSSISWDGLDPGK                   | 833.7631  | 3 | 16 | y9     | 41     | 57.0  |
| 2140 | IPI00131803.1 | VLTPQVMNRPSSISWDGLDPGK                   | 833.7601  | 3 | 19 |        | 0      | 19.0  |
| 2141 | IPI00131803.1 | VLTPQVMNRPSSISWDGLDPGK                   | 833.7632  | 3 | 21 |        | 0      | 21.0  |
| 2142 | IPI00114818.1 | AGEMTEVLPNQR                             | 672.8382  | 2 | 54 | P y4   | 41     | 95.0  |
| 2143 | IPI00114818.1 | FDNTYSFIHAK                              | 448.2194  | 3 | 19 |        | 0      | 19.0  |
| 2144 | IPI00114818.1 | FDNTYSFIHAK                              | 671.8276  | 2 | 58 | y6     | 35.8   | 93.8  |
| 2145 | IPI00114818.1 | FRENVQDVLPTLPNDDYFLLR                    | 888.1272  | 3 | 18 |        | 0      | 18.0  |
| 2146 | IPI00114818.1 | IISWQPPEVIQQYLSGGR                       | 691.3716  | 3 | 34 | y5     | 13.65  | 47.7  |
| 2147 | IPI00114818.1 | IISWQPPEVIQQYLSGGR                       | 1036.5540 | 2 | 40 | c b5 P | 62.3   | 102.3 |
| 2148 | IPI00114818.1 | IISWQPPEVIQQYLSGGR                       | 1036.5546 | 2 | 46 |        | 0      | 46.0  |
| 2149 | IPI00114818.1 | IISWQPPEVIQQYLSGGR                       | 1036.5542 | 2 | 53 | y8     | 0.35   | 53.4  |
| 2150 | IPI00114818.1 | IMVLGANWK                                | 516.2893  | 2 | 36 | y7     | 46.75  | 82.8  |
| 2151 | IPI00114818.1 | INYGGDIPK                                | 488.7590  | 2 | 37 | y7     | 95.65  | 132.7 |
| 2152 | IPI00114818.1 | LFPVAYNLIK                               | 589.3554  | 2 | 22 | P y8   | 44.3   | 66.3  |
| 2153 | IPI00114818.1 | PFLSEDTR                                 | 482.7401  | 2 | 21 | y6     | 14.55  | 35.6  |
| 2154 | IPI00114818.1 | QQYEHTVQVSR                              | 687.8424  | 2 | 24 | y4     | 7.1    | 31.1  |
| 2155 | IPI00114818.1 | VGDLSPKQEEALAK                           | 495.6037  | 3 | 20 |        | 0      | 20.0  |
| 2156 | IPI00311818.1 | ANQVIR                                   | 742.4265  | 1 | 23 |        | 0      | 23.0  |
| 2157 | IPI00311818.1 | IIGIDINK                                 | 443.2736  | 2 | 48 | y6     | 75.6   | 123.6 |
| 2158 | IPI00311818.1 | IKVDEFVTGNLSFDQINQAFDLMHSGDSIR           | 850.1683  | 4 | 46 |        | 0      | 46.0  |
| 2159 | IPI00311818.1 | LATAVCHTDAYTLGADPEGCFPVILGHEGAGIVESVGEGV | 1096.9914 | 4 | 19 | y8     | 30.4   | 49.4  |
| 2160 | IPI00311818.1 | LATAVCHTDAYTLGADPEGCFPVILGHEGAGIVESVGEGV | 1097.0215 | 4 | 21 | y9     | 28.95  | 50.0  |
| 2161 | IPI00311818.1 | LVSEYMSK                                 | 478.7421  | 2 | 16 | y6     | 111.85 | 127.9 |
| 2162 | IPI00311818.1 | SALEAAHK                                 | 413.7246  | 2 | 42 | y5     | 41     | 83.0  |
| 2163 | IPI00311818.1 | VDEFVTGNLSFDQINQAFDLMHSGDSIR             | 1053.1635 | 3 | 43 |        | 0      | 43.0  |
| 2164 | IPI00311818.1 | VDEFVTGNLSFDQINQAFDLMHSGDSIR             | 1052.8278 | 3 | 52 | y++16  | 8.95   | 61.0  |
| 2165 | IPI00311818.1 | VDEFVTGNLSFDQINQAFDLMHSGDSIR             | 1052.8325 | 3 | 56 | b4     | 49.1   | 105.1 |
| 2166 | IPI00169670.1 | VLWTPQVLTNGVQFFR                         | 953.5249  | 2 | 57 | c b4 P | 16.9   | 73.9  |
| 2167 | IPI00169670.1 | VLWTPQVLTNGVQFFR                         | 954.0160  | 2 | 70 |        | 0      | 70.0  |
| 2168 | IPI00169670.1 | VLWTPQVLTNGVQFFR                         | 953.5247  | 2 | 73 | y8     | 12.15  | 85.2  |
| 2169 | IPI00169670.1 | VSPDGEEGYPGELK                           | 738.8545  | 2 | 39 | P y5   | 57.05  | 96.1  |
| 2170 | IPI00408525.1 | AGEYSVTYDGFNTFTIPK                       | 1005.9834 | 2 | 43 | c b6   | 16.9   | 59.9  |

|      |               |                                          |           |   |    |       |       |       |
|------|---------------|------------------------------------------|-----------|---|----|-------|-------|-------|
| 2171 | IPI00408525.1 | AGEYSVTYDGFNTFTIPK                       | 1005.9834 | 2 | 48 |       | 0     | 48.0  |
| 2172 | IPI00408525.1 | DGETFQLMGLYGREPDLSSDIK                   | 824.7314  | 3 | 36 | y++15 | 16.75 | 52.8  |
| 2173 | IPI00408525.1 | DGETFQLMGLYGREPDLSSDIK                   | 824.7313  | 3 | 39 | y++16 | 31.7  | 70.7  |
| 2174 | IPI00408525.1 | ENIIDLNSNANR                             | 629.8231  | 2 | 59 | y5    | 25.35 | 84.4  |
| 2175 | IPI00408525.1 | LFLEQIHVLENSLVLK                         | 632.7057  | 3 | 22 |       | 0     | 22.0  |
| 2176 | IPI00408525.1 | TDYDNFLMAHLINEK                          | 912.9369  | 2 | 43 | y6    | 89    | 132.0 |
| 2177 | IPI00230682.4 | AVTEQGHLSNEER                            | 799.8802  | 2 | 75 | y6    | 38.2  | 113.2 |
| 2178 | IPI00230682.4 | EMQPTHPIR                                | 554.7819  | 2 | 27 | y4    | 44.5  | 71.5  |
| 2179 | IPI00230682.4 | TAFDEAIAELDTLNEESYK                      | 1080.5090 | 2 | 57 | c b9  | 1.95  | 59.0  |
| 2180 | IPI00222430.3 | AKWDSWNK                                 | 345.5064  | 3 | 23 | y++7  | 16.9  | 39.9  |
| 2181 | IPI00222430.3 | AKWDSWNK                                 | 517.7566  | 2 | 25 | y6    | 65.15 | 90.2  |
| 2182 | IPI00222430.3 | QATVGDVNTDRPGLLDLK                       | 638.3433  | 3 | 19 |       | 0     | 19.0  |
| 2183 | IPI00222430.3 | QATVGDVNTDRPGLLDLK                       | 638.0125  | 3 | 24 |       | 0     | 24.0  |
| 2184 | IPI00222430.3 | QATVGDVNTDRPGLLDLK                       | 638.0081  | 3 | 33 |       | 0     | 33.0  |
| 2185 | IPI00222430.3 | QATVGDVNTDRPGLLDLK                       | 957.0133  | 2 | 37 | y++14 | 4.7   | 41.7  |
| 2186 | IPI00222430.3 | TQPTDEEMLFYSHFK                          | 993.9675  | 2 | 37 |       | 0     | 37.0  |
| 2187 | IPI00222430.3 | TQPTDEEMLFYSHFK                          | 993.9678  | 2 | 55 | y7    | 46.75 | 101.8 |
| 2188 | IPI00222430.3 | TQPTDEEMLFYSHFK                          | 993.4746  | 2 | 78 | y5    | 38.2  | 116.2 |
| 2189 | IPI00222430.3 | WDSWNK                                   | 418.1900  | 2 | 15 | y5    | 36.1  | 51.1  |
| 2190 | IPI00321203.1 | AADFPQELFSWE                             | 720.3276  | 2 | 37 | c b8  | 46.75 | 83.8  |
| 2191 | IPI00321203.1 | DVLVSGYHYFNALK                           | 813.4527  | 2 | 55 | y7    | 31.95 | 87.0  |
| 2192 | IPI00321203.1 | EQVPWK                                   | 393.7108  | 2 | 15 | y4    | 44.5  | 59.5  |
| 2193 | IPI00321203.1 | GDPTWVQSTIANER                           | 787.4177  | 2 | 41 | y4    | 15.6  | 56.6  |
| 2194 | IPI00321203.1 | HYFNALKQGKEQVPWK                         | 658.3399  | 3 | 19 | c b5  | 1.4   | 20.4  |
| 2195 | IPI00321203.1 | LMASLLPIQLFPK                            | 735.9657  | 2 | 22 | P y7  | 77.6  | 99.6  |
| 2196 | IPI00321203.1 | LMASLLPIQLFPK                            | 736.4421  | 2 | 30 | P y7  | 33.75 | 63.8  |
| 2197 | IPI00321203.1 | NHFTVAQAEAFDK                            | 493.2413  | 3 | 40 | y6    | 49.6  | 89.6  |
| 2198 | IPI00321203.1 | NHFTVAQAEAFDK                            | 739.3643  | 2 | 52 | y8    | 69.75 | 121.8 |
| 2199 | IPI00321203.1 | NISFQIMK                                 | 490.7659  | 2 | 23 | y6    | 65.15 | 88.2  |
| 2200 | IPI00321203.1 | SFFSSK                                   | 351.6766  | 2 | 25 | y4    | 25.35 | 50.4  |
| 2201 | IPI00321203.1 | SFFSSK                                   | 702.3536  | 1 | 32 | y4    | 57.05 | 89.1  |
| 2202 | IPI00321203.1 | TPWIEFENNYR                              | 734.8457  | 2 | 41 | y7    | 22.4  | 63.4  |
| 2203 | IPI00321203.1 | VIYLIR                                   | 388.7552  | 2 | 29 | y4    | 57.05 | 86.1  |
| 2204 | IPI00121209.1 | ARPAEDLR                                 | 347.5331  | 3 | 37 |       | 0     | 37.0  |
| 2205 | IPI00121209.1 | DFANVYVDAVK                              | 621.3238  | 2 | 42 | y6    | 89    | 131.0 |
| 2206 | IPI00121209.1 | DFANVYVDAVK                              | 620.8142  | 2 | 46 | y6    | 89    | 135.0 |
| 2207 | IPI00121209.1 | DFWDNLEK                                 | 533.7457  | 2 | 16 | y6    | 46.75 | 62.8  |
| 2208 | IPI00121209.1 | DSGRDYVSQFESSSLGQQLNLLNLENWDTLGSTVSQLQER | 1130.2695 | 4 | 30 | y4    | 16.9  | 46.9  |
| 2209 | IPI00121209.1 | DSGRDYVSQFESSSLGQQLNLLNLENWDTLGSTVSQLQER | 1129.5271 | 4 | 63 | y7    | 1.75  | 64.8  |
| 2210 | IPI00121209.1 | HSLMPMLETLK                              | 650.3530  | 2 | 24 | P y7  | 46.75 | 70.8  |
| 2211 | IPI00121209.1 | KWKEDVELYR                               | 455.9100  | 3 | 22 | y4    | 15.6  | 37.6  |

|      |               |                                           |           |   |    |        |        |       |
|------|---------------|-------------------------------------------|-----------|---|----|--------|--------|-------|
| 2212 | IPI00121209.1 | LSPVAEEFRDR                               | 659.8419  | 2 | 18 |        | 0      | 18.0  |
| 2213 | IPI00121209.1 | THVDSLRL                                  | 414.2220  | 2 | 28 | y4     | 41     | 69.0  |
| 2214 | IPI00121209.1 | VAPLGAELQESAR                             | 670.8620  | 2 | 63 | y5     | 15.6   | 78.6  |
| 2215 | IPI00126172.1 | AKVIK                                     | 558.3606  | 1 | 22 |        | 0      | 22.0  |
| 2216 | IPI00126172.1 | IAEVGGVPYLLPLVNK                          | 841.9979  | 2 | 32 |        | 0      | 32.0  |
| 2217 | IPI00126172.1 | IAEVGGVPYLLPLVNK                          | 841.9980  | 2 | 48 | c b7 P | 13.65  | 61.7  |
| 2218 | IPI00126172.1 | LPGAFILGAGAGPFQTLGFNSEFMPIVQTASEHNQPVNGSY | 1188.8413 | 4 | 18 | b7     | 27.2   | 45.2  |
| 2219 | IPI00126172.1 | LPGAFILGAGAGPFQTLGFNSEFMPIVQTASEHNQPVNGSY | 1187.8476 | 4 | 33 | b7     | 20.55  | 53.6  |
| 2220 | IPI00126172.1 | LPGAFILGAGAGPFQTLGFNSEFMPIVQTASEHNQPVNGSY | 1188.3295 | 4 | 40 | y++13  | 2.65   | 42.7  |
| 2221 | IPI00126172.1 | LPGAFILGAGAGPFQTLGFNSEFMPIVQTASEHNQPVNGSY | 1188.0950 | 4 | 50 | y++13  | 2.15   | 52.2  |
| 2222 | IPI00126172.1 | LPGAFILGAGAGPFQTLGFNSEFMPIVQTASEHNQPVNGSY | 1188.5918 | 4 | 57 | y7     | 13.65  | 70.7  |
| 2223 | IPI00126172.1 | QTLEEHYGDKPVGMGGTFIVQK                    | 812.4079  | 3 | 27 |        | 0      | 27.0  |
| 2224 | IPI00126172.1 | VIEVQAK                                   | 393.7397  | 2 | 27 | y4     | 57.05  | 84.1  |
| 2225 | IPI00126172.1 | VYDLNEIAK                                 | 532.7846  | 2 | 28 | y7     | 102.45 | 130.5 |
| 2226 | IPI00331556.3 | SNLAYDIVQLPTGLTGIK                        | 952.5300  | 2 | 61 | P y8   | 69.75  | 130.8 |
| 2227 | IPI00331556.3 | SNLAYDIVQLPTGLTGIK                        | 952.5303  | 2 | 62 |        | 0      | 62.0  |
| 2228 | IPI00331556.3 | TRFQESEERPK                               | 469.5725  | 3 | 37 | c b5   | 52.95  | 90.0  |
| 2229 | IPI00331556.3 | TSTVDLPIESQLLWQLDREMLGLYTENEGK            | 1160.5936 | 3 | 23 | y6     | 7.1    | 30.1  |
| 2230 | IPI00331556.3 | TSTVDLPIESQLLWQLDREMLGLYTENEGK            | 1160.5932 | 3 | 28 | b6 P   | 0.7    | 28.7  |
| 2231 | IPI00331556.3 | TSTVDLPIESQLLWQLDREMLGLYTENEGK            | 1160.5937 | 3 | 54 |        | 0      | 54.0  |
| 2232 | IPI00118059.1 | ADRDATLWASHEK                             | 514.5833  | 3 | 36 | y5     | 44.5   | 80.5  |
| 2233 | IPI00118059.1 | AGMIFYR                                   | 429.2209  | 2 | 38 | y4     | 83.9   | 121.9 |
| 2234 | IPI00118059.1 | ALSDALTELGYSK                             | 640.8461  | 2 | 92 | y6     | 38.2   | 130.2 |
| 2235 | IPI00118059.1 | GLLEEDFQK                                 | 539.7745  | 2 | 24 | y5     | 27.2   | 51.2  |
| 2236 | IPI00118059.1 | IQSAVATLREEVENFASNFSPLGPDF                | 984.8328  | 3 | 16 | y7     | 52.95  | 69.0  |
| 2237 | IPI00118059.1 | IQSAVATLREEVENFASNFSPLGPDF                | 984.8329  | 3 | 24 | P y6   | 69.75  | 93.8  |
| 2238 | IPI00118059.1 | IQSAVATLREEVENFASNFSPLGPDF                | 984.8328  | 3 | 33 |        | 0      | 33.0  |
| 2239 | IPI00118059.1 | ISATSIFFESMPYK                            | 810.9145  | 2 | 48 |        | 0      | 48.0  |
| 2240 | IPI00118059.1 | MLSQPLK                                   | 408.7362  | 2 | 22 | y5     | 25.35  | 47.4  |
| 2241 | IPI00118059.1 | QAMTTEFK                                  | 478.2318  | 2 | 28 |        | 0      | 28.0  |
| 2242 | IPI00118059.1 | SALRPSGLR                                 | 478.7856  | 2 | 19 | P y5   | 49.6   | 68.6  |
| 2243 | IPI00118059.1 | VAHFIHR                                   | 440.2513  | 2 | 48 |        | 0      | 48.0  |
| 2244 | IPI00118059.1 | VYPETGYINYDQLEENASLFHPK                   | 910.1038  | 3 | 21 |        | 0      | 21.0  |
| 2245 | IPI00118059.1 | VYPETGYINYDQLEENASLFHPK                   | 910.1037  | 3 | 33 |        | 0      | 33.0  |
| 2246 | IPI00270906.2 | EGMNIVEAMER                               | 639.7936  | 2 | 40 | y6     | 25.35  | 65.4  |
| 2247 | IPI00270906.2 | FEDENFILK                                 | 577.7903  | 2 | 55 | y7     | 82.65  | 137.7 |
| 2248 | IPI00270906.2 | SIYGEKFEDENFILK                           | 916.4602  | 2 | 47 | y5     | 57.05  | 104.1 |
| 2249 | IPI00270906.2 | TAENFR                                    | 369.1826  | 2 | 19 | y4     | 41     | 60.0  |
| 2250 | IPI00270906.2 | TEWLDGK                                   | 848.4330  | 1 | 27 | y5     | 82.65  | 109.7 |
| 2251 | IPI00270906.2 | VNPTVFFDITADDEPLGR                        | 1025.0018 | 2 | 42 | P y4   | 41     | 83.0  |
| 2252 | IPI00270906.2 | VNPTVFFDITADDEPLGR                        | 1004.0012 | 2 | 69 | y7     | 23.75  | 92.8  |

|      |               |                                           |           |   |    |         |       |       |
|------|---------------|-------------------------------------------|-----------|---|----|---------|-------|-------|
| 2253 | IPI00270906.2 | VSFELFADK                                 | 528.2742  | 2 | 46 | y4      | 89    | 135.0 |
| 2254 | IPI00270906.2 | VSFELFADKVPK                              | 460.5904  | 3 | 34 |         | 0     | 34.0  |
| 2255 | IPI00128378.1 | AGNLKPGDTIIEPTSGNTGIGLALAAAVK             | 917.5098  | 3 | 40 | y11     | 25.45 | 65.5  |
| 2256 | IPI00128378.1 | AGNLKPGDTIIEPTSGNTGIGLALAAAVK             | 917.5096  | 3 | 42 | y9      | 31.95 | 74.0  |
| 2257 | IPI00128378.1 | AGNLKPGDTIIEPTSGNTGIGLALAAAVK             | 917.5100  | 3 | 43 | y11     | 25.45 | 68.5  |
| 2258 | IPI00128378.1 | GFDQAPVVNESGAILGMVTLGNMLSSLLAGK           | 1030.8719 | 3 | 33 | b8      | 6.6   | 39.6  |
| 2259 | IPI00128378.1 | GFDQAPVVNESGAILGMVTLGNMLSSLLAGK           | 1030.8715 | 3 | 33 | b5 P    | 25.35 | 58.4  |
| 2260 | IPI00128378.1 | GFDQAPVVNESGAILGMVTLGNMLSSLLAGK           | 1030.8715 | 3 | 37 | b5 P    | 7.7   | 44.7  |
| 2261 | IPI00128378.1 | IIGVDPEGSILAEPEELNQTEQTAYEVEGIGYDFIPTVLDR | 1131.2922 | 4 | 25 | P y6    | 57.05 | 82.1  |
| 2262 | IPI00224740.3 | DRSSFFVNGLTGGQK                           | 575.9696  | 3 | 18 | y6      | 46.75 | 64.8  |
| 2263 | IPI00224740.3 | DRSSFFVNGLTGGQK                           | 576.3137  | 3 | 34 | y6      | 13.65 | 47.7  |
| 2264 | IPI00224740.3 | DRSSFFVNGLTGGQK                           | 576.3034  | 3 | 38 | y6      | 46.75 | 84.8  |
| 2265 | IPI00224740.3 | DRSSFFVNGLTGGQK                           | 863.4480  | 2 | 71 | y9      | 12.15 | 83.2  |
| 2266 | IPI00224740.3 | DSPSVWAAVPGK                              | 607.3163  | 2 | 34 | c b9 P  | 12.15 | 46.2  |
| 2267 | IPI00224740.3 | EGVHGGLINKK                               | 576.3301  | 2 | 30 |         | 0     | 30.0  |
| 2268 | IPI00224740.3 | SSFFVNGLTGGQK                             | 728.3861  | 2 | 33 | y6      | 25.35 | 58.4  |
| 2269 | IPI00224740.3 | SSFFVNGLTGGQK                             | 728.3862  | 2 | 40 |         | 0     | 40.0  |
| 2270 | IPI00224740.3 | TFVSITPAEVLVVGK                           | 808.9673  | 2 | 34 | c b6 P  | 13.65 | 47.7  |
| 2271 | IPI00224740.3 | TFVSITPAEVLVVGK                           | 808.9673  | 2 | 41 | P y10   | 61.2  | 102.2 |
| 2272 | IPI00224740.3 | TFVSITPAEVLVVGK                           | 808.9673  | 2 | 44 | P y10   | 93.7  | 137.7 |
| 2273 | IPI00408407.1 | ALPFWNEEIVPQIK                            | 842.4608  | 2 | 28 | y5      | 49.1  | 77.1  |
| 2274 | IPI00408407.1 | ALPFWNEEIVPQIK                            | 842.9605  | 2 | 48 | P y4    | 75.6  | 123.6 |
| 2275 | IPI00408407.1 | AMEAVAAQ GK                               | 488.2502  | 2 | 65 | y5      | 75.6  | 140.6 |
| 2276 | IPI00408407.1 | FSGWYDADLSPAGHEEAK                        | 660.6370  | 3 | 29 |         | 0     | 29.0  |
| 2277 | IPI00408407.1 | HGESAWNLENR                               | 656.8047  | 2 | 72 | y6      | 52.95 | 125.0 |
| 2278 | IPI00408407.1 | HYGGLTGLNK                                | 530.2834  | 2 | 39 | y8      | 69.75 | 108.8 |
| 2279 | IPI00408407.1 | NLKPIKPMQFLGDEETVRK                       | 748.7688  | 3 | 21 | y8      | 16.9  | 37.9  |
| 2280 | IPI00408407.1 | NLKPIKPMQFLGDEETVRK                       | 748.7432  | 3 | 27 |         | 0     | 27.0  |
| 2281 | IPI00408407.1 | RGGQALR                                   | 379.2252  | 2 | 24 | b5      | 13.65 | 37.7  |
| 2282 | IPI00408407.1 | RVLIAAHGNSLR                              | 436.2615  | 3 | 56 | y5      | 38.2  | 94.2  |
| 2283 | IPI00408407.1 | TLWTVLDAIDQMWPVVR                         | 1079.0839 | 2 | 17 | y5      | 35.8  | 52.8  |
| 2284 | IPI00408407.1 | TLWTVLDAIDQMWPVVR                         | 1079.0841 | 2 | 33 | y5      | 35.8  | 68.8  |
| 2285 | IPI00132655.1 | EGLLTLGAK                                 | 515.3012  | 2 | 52 | y6      | 46.75 | 98.8  |
| 2286 | IPI00132655.1 | GKTELTPAYF                                | 563.8150  | 2 | 17 | y5      | 6.6   | 23.6  |
| 2287 | IPI00132655.1 | MTDSFTEQADQVTADV GK                       | 972.4400  | 2 | 69 | y6      | 52.95 | 122.0 |
| 2288 | IPI00132655.1 | QSMWTSTISSHLATK                           | 839.4409  | 2 | 63 | y7      | 49.6  | 112.6 |
| 2289 | IPI00132655.1 | RPNSGSLIQVTTD GKTELTPAYF                  | 865.7883  | 3 | 22 | P y4    | 29.45 | 51.5  |
| 2290 | IPI00315452.4 | EAQIFDYNEIPNFPQSTVQGHAGR                  | 907.1028  | 3 | 47 | P y++11 | 5.55  | 52.6  |
| 2291 | IPI00315452.4 | EAQIFDYNEIPNFPQSTVQGHAGR                  | 907.1028  | 3 | 61 | y++15   | 58.85 | 119.9 |
| 2292 | IPI00315452.4 | LVFGLNGR                                  | 495.3021  | 2 | 22 | y4      | 29.45 | 51.5  |
| 2293 | IPI00315452.4 | LVFGLNGR                                  | 494.8011  | 2 | 55 | y7      | 49.6  | 104.6 |



|      |               |                           |           |   |    |       |       |       |
|------|---------------|---------------------------|-----------|---|----|-------|-------|-------|
| 2294 | IPI00315452.4 | VFGFSLITNK                | 563.3188  | 2 | 60 | y8    | 73.4  | 133.4 |
| 2295 | IPI00111876.2 | AGVDQHEGTIQ               | 598.7994  | 2 | 47 | y8    | 73.4  | 120.4 |
| 2296 | IPI00111876.2 | FSSETWQNLGTLQR            | 833.9145  | 2 | 74 | y5    | 18.5  | 92.5  |
| 2297 | IPI00111876.2 | GLLDFLQGLA                | 1046.5906 | 1 | 39 | b9    | 11    | 50.0  |
| 2298 | IPI00111876.2 | GLLDFLQGLA                | 523.8045  | 2 | 61 | c b5  | 15.6  | 76.6  |
| 2299 | IPI00111876.2 | INAVDYASVK                | 540.7915  | 2 | 28 | y8    | 44.3  | 72.3  |
| 2300 | IPI00111876.2 | TPALIVYGDQDPMGSSSFQHLK    | 798.0622  | 3 | 43 | b5    | 7.1   | 50.1  |
| 2301 | IPI00226993.3 | EAFQEALAAAGDK             | 660.8297  | 2 | 82 | y5    | 57.05 | 139.1 |
| 2302 | IPI00226993.3 | EAFQEALAAAGDK             | 660.8296  | 2 | 85 | y6    | 52.95 | 138.0 |
| 2303 | IPI00136134.1 | AELQEVQITEEKPLLPQQTPEAK   | 898.1439  | 3 | 38 | P y9  | 44.3  | 82.3  |
| 2304 | IPI00136134.1 | AELQEVQITEEKPLLPQQTPEAK   | 898.1404  | 3 | 40 |       | 0     | 40.0  |
| 2305 | IPI00136134.1 | FGDMQEIIQNFVR             | 798.8942  | 2 | 60 | y5    | 7.1   | 67.1  |
| 2306 | IPI00136134.1 | GIIQHAPNLENIELYWNSYNNRR   | 704.6083  | 4 | 43 | y++13 | 16.75 | 59.8  |
| 2307 | IPI00136134.1 | GIIQHAPNLENIELYWNSYNNRR   | 704.3710  | 4 | 50 | y++12 | 11    | 61.0  |
| 2308 | IPI00136134.1 | LDPTQTSFLK                | 575.3114  | 2 | 37 | P y8  | 58.1  | 95.1  |
| 2309 | IPI00136134.1 | MADSGGQPQLTQPGK           | 757.8793  | 2 | 57 | P y8  | 31.95 | 89.0  |
| 2310 | IPI00136134.1 | PLLPQQTPEAK               | 626.3547  | 2 | 31 | P y9  | 66.55 | 97.6  |
| 2311 | IPI00136134.1 | YALNHPDVEGLVLINIDPNAK     | 803.0953  | 3 | 27 | P y4  | 41    | 68.0  |
| 2312 | IPI00136134.1 | YRGIIQHAPNLENIELYWNSYNNRR | 784.4012  | 4 | 18 |       | 0     | 18.0  |
| 2313 | IPI00128518.1 | EAMQEALK                  | 460.7418  | 2 | 25 |       | 0     | 25.0  |
| 2314 | IPI00128518.1 | ELLEVVNK                  | 472.2771  | 2 | 39 |       | 0     | 39.0  |
| 2315 | IPI00128518.1 | FVIGGPQGDAGVTGR           | 715.9006  | 2 | 64 | P y10 | 27.7  | 91.7  |
| 2316 | IPI00128518.1 | FVIGGPQGDAGVTGRK          | 520.2831  | 3 | 22 | y++12 | 22.4  | 44.4  |
| 2317 | IPI00128518.1 | HIGYDDSAK                 | 503.2358  | 2 | 37 | y7    | 49.6  | 86.6  |
| 2318 | IPI00128518.1 | IADLRR                    | 372.2298  | 2 | 27 |       | 0     | 27.0  |
| 2319 | IPI00128518.1 | IIVDTYGGWGAHGGGAFSGK      | 650.6629  | 3 | 32 | y++17 | 75.5  | 107.5 |
| 2320 | IPI00128518.1 | KPIYQK                    | 388.7369  | 2 | 31 | P y5  | 27.2  | 58.2  |
| 2321 | IPI00128518.1 | SEFPWEVPK                 | 559.7843  | 2 | 34 | P y6  | 89    | 123.0 |
| 2322 | IPI00128518.1 | SGVLPWLRPDSK              | 677.8767  | 2 | 29 | y5    | 25.35 | 54.4  |
| 2323 | IPI00128518.1 | TERELLEVVNK               | 665.3774  | 2 | 29 | c b7  | 5.85  | 34.9  |
| 2324 | IPI00128518.1 | TQVTVQYMQDNGAVIPVR        | 1010.5232 | 2 | 54 | y5    | 13.65 | 67.7  |
| 2325 | IPI00128518.1 | YLDEDTVYHLQPSSGR          | 598.2890  | 3 | 30 | y++11 | 55.3  | 85.3  |
| 2326 | IPI00128518.1 | YLDEDTVYHLQPSSGR          | 598.6233  | 3 | 34 | P y4  | 16.9  | 50.9  |
| 2327 | IPI00111315.1 | SAGTSLVNFFSSLMNLEEK       | 1038.0097 | 2 | 69 | y5    | 69.9  | 138.9 |
| 2328 | IPI00111315.1 | SAGTSLVNFFSSLMNLEEKAPAAA  | 828.1037  | 3 | 23 | y7    | 52.95 | 76.0  |
| 2329 | IPI00111315.1 | THEQLTPLVR                | 597.3364  | 2 | 38 | y8    | 21.2  | 59.2  |
| 2330 | IPI00331442.1 | GVYSTQVGFAGGHTR           | 512.9235  | 3 | 15 | y++12 | 12.15 | 27.2  |
| 2331 | IPI00331442.1 | GVYSTQVGFAGGHTR           | 768.9090  | 2 | 71 | y8    | 30.4  | 101.4 |
| 2332 | IPI00331442.1 | QGNDFGTQYR                | 593.2682  | 2 | 48 | y5    | 29.45 | 77.5  |
| 2333 | IPI00331442.1 | SAVYPTSAVQMEAALR          | 847.4347  | 2 | 70 | y8    | 11.55 | 81.6  |
| 2334 | IPI00331442.1 | TGHAEVVR                  | 434.7355  | 2 | 39 | y4    | 27.2  | 66.2  |

|      |               |                               |           |   |    |        |        |       |
|------|---------------|-------------------------------|-----------|---|----|--------|--------|-------|
| 2335 | IPI00331442.1 | VFWENHDPTQGM                  | 539.9155  | 3 | 23 | y++10  | 35.8   | 58.8  |
| 2336 | IPI00269510.2 | HLEINPDHPIVETLR               | 594.9878  | 3 | 28 | P y7   | 65.15  | 93.2  |
| 2337 | IPI00269510.2 | NTGIGMTKTDLINLNR              | 445.4976  | 4 | 17 |        | 0      | 17.0  |
| 2338 | IPI00331127.1 | AEDGIVLDFPVYPTFPQDFHEVEDLIK   | 1045.5149 | 3 | 33 | b7     | 7.1    | 40.1  |
| 2339 | IPI00331127.1 | AEDGIVLDFPVYPTFPQDFHEVEDLIK   | 1045.5178 | 3 | 36 | b8     | 31.95  | 68.0  |
| 2340 | IPI00331127.1 | GLILTVK                       | 372.2550  | 2 | 24 | y5     | 69.75  | 93.8  |
| 2341 | IPI00331127.1 | MKLPIFIADAFTATAFR             | 638.3704  | 3 | 37 | y5     | 15.6   | 52.6  |
| 2342 | IPI00331127.1 | RAEDGIVLDFPVYPTFPQDFHEVEDLIK  | 1097.5589 | 3 | 41 | b9     | 30.4   | 71.4  |
| 2343 | IPI00331127.1 | TLEEDAHQQIAR                  | 470.9041  | 3 | 22 |        | 0      | 22.0  |
| 2344 | IPI00331127.1 | TLEEDAHQQIAR                  | 705.8526  | 2 | 85 | y6     | 52.95  | 138.0 |
| 2345 | IPI00331127.1 | VNTEPLPAIEK                   | 605.8371  | 2 | 29 | c b4 P | 16.9   | 45.9  |
| 2346 | IPI00124223.1 | APLDIPVPDPVK                  | 630.8723  | 2 | 47 | P y7   | 77.6   | 124.6 |
| 2347 | IPI00124223.1 | EPALNEANLSNLK                 | 706.8833  | 2 | 48 | y4     | 44.5   | 92.5  |
| 2348 | IPI00124223.1 | IEDGNNFGV                     | 482.7284  | 2 | 27 | y7     | 23.75  | 50.8  |
| 2349 | IPI00124223.1 | IEDGNNFGVAVQEK                | 760.3860  | 2 | 54 | y5     | 83.9   | 137.9 |
| 2350 | IPI00124223.1 | IVVLLQR                       | 420.7869  | 2 | 26 | y5     | 27.2   | 53.2  |
| 2351 | IPI00124223.1 | LEGFHTQISK                    | 580.3093  | 2 | 29 | y8     | 31.95  | 61.0  |
| 2352 | IPI00124223.1 | LMVMEIR                       | 446.2432  | 2 | 25 | y5     | 52.95  | 78.0  |
| 2353 | IPI00352629.1 | PYTLMSMVANLLYEK               | 887.4567  | 2 | 75 | y7     | 22.4   | 97.4  |
| 2354 | IPI00352629.1 | PYTLMSMVANLLYEK               | 886.9523  | 2 | 88 | y4     | 83.9   | 171.9 |
| 2355 | IPI00116279.1 | AFADALEVIPMALSENSGMNPIQTMTEVR | 1046.5118 | 3 | 35 | b9 P   | 19.15  | 54.2  |
| 2356 | IPI00116279.1 | SQDDEIGDGTGVVVLGALLEEAEQLLDR  | 1038.8571 | 3 | 43 | y6     | 1.25   | 44.3  |
| 2357 | IPI00116279.1 | VLVDINNPEPLIQTAK              | 883.0035  | 2 | 56 | P y7   | 35.8   | 91.8  |
| 2358 | IPI00116279.1 | VLVDINNPEPLIQTAK              | 882.4999  | 2 | 76 | P y9   | 52.75  | 128.8 |
| 2359 | IPI00132076.1 | AVYQGPSSPVK                   | 595.3141  | 2 | 35 | y8     | 55.3   | 90.3  |
| 2360 | IPI00132076.1 | AVYQGPSSPVKS                  | 638.8302  | 2 | 52 | y9     | 42.15  | 94.2  |
| 2361 | IPI00132076.1 | EWAMNVGDAK                    | 560.7582  | 2 | 37 | y6     | 95.65  | 132.7 |
| 2362 | IPI00132076.1 | GQIMDAVIR                     | 501.7744  | 2 | 44 | y7     | 33.75  | 77.8  |
| 2363 | IPI00132076.1 | GTVLLADNVIVPGTPDFLAYVR        | 1166.1401 | 2 | 45 | P y8   | 5.55   | 50.6  |
| 2364 | IPI00132076.1 | GTVLLADNVIVPGTPDFLAYVR        | 1166.1400 | 2 | 46 | P y8   | 12.15  | 58.2  |
| 2365 | IPI00132076.1 | LLTMEINPDYAAITQQMLDFAGLQDK    | 980.8240  | 3 | 38 | y6     | 25.35  | 63.4  |
| 2366 | IPI00319992.1 | IINEPTAAAIAAYGLDK             | 830.4500  | 2 | 70 | y5     | 29.45  | 99.5  |
| 2367 | IPI00319992.1 | PTVTIK                        | 658.4499  | 1 | 29 | b5     | 44.5   | 73.5  |
| 2368 | IPI00319992.1 | RALSSQHQR                     | 385.2113  | 3 | 50 | y4     | 15.6   | 65.6  |
| 2369 | IPI00123176.1 | TVQAENGLVING                  | 672.3267  | 2 | 20 |        | 0      | 20.0  |
| 2370 | IPI00123176.1 | VIPELNGK                      | 869.5290  | 1 | 24 | P y6   | 102.45 | 126.5 |
| 2371 | IPI00129164.1 | DMLYQVLAEEPSVR                | 861.4332  | 2 | 40 | P y4   | 49.1   | 89.1  |
| 2372 | IPI00129164.1 | DMLYQVLAEEPSVR                | 574.6261  | 3 | 41 | P y4   | 29.45  | 70.5  |
| 2373 | IPI00129164.1 | DMLYQVLAEEPSVR                | 574.2907  | 3 | 41 | P y4   | 57.05  | 98.1  |
| 2374 | IPI00129164.1 | DMLYQVLAEEPSVR                | 860.9339  | 2 | 44 | P y4   | 29.45  | 73.5  |
| 2375 | IPI00129164.1 | LLSPGSVMLVSAR                 | 665.3826  | 2 | 72 | c b10  | 23.75  | 95.8  |

|      |               |                                 |           |   |     |        |       |       |
|------|---------------|---------------------------------|-----------|---|-----|--------|-------|-------|
| 2376 | IPI00129164.1 | VLSYAPGPLDNDMQQLAR              | 994.9981  | 2 | 39  | y8     | 21.2  | 60.2  |
| 2377 | IPI00129164.1 | VLSYAPGPLDNDMQQLAR              | 994.9981  | 2 | 51  | c b5 P | 41    | 92.0  |
| 2378 | IPI00336324.4 | AIADHIR                         | 398.2273  | 2 | 34  | y5     | 44.5  | 78.5  |
| 2379 | IPI00336324.4 | DLDAVAVLVGSMR                   | 686.3671  | 2 | 23  | y5     | 16.9  | 39.9  |
| 2380 | IPI00336324.4 | DLDAVAVLVGSMR                   | 686.3691  | 2 | 64  | y5     | 29.45 | 93.5  |
| 2381 | IPI00336324.4 | ETAFFLSSA                       | 1101.5141 | 1 | 25  |        | 0     | 25.0  |
| 2382 | IPI00336324.4 | ETAFFLSSA                       | 1101.5093 | 1 | 26  |        | 0     | 26.0  |
| 2383 | IPI00336324.4 | EVGVYEALK                       | 1007.5436 | 1 | 30  |        | 0     | 30.0  |
| 2384 | IPI00336324.4 | EVGVYEALK                       | 504.2739  | 2 | 48  | y5     | 69.75 | 117.8 |
| 2385 | IPI00336324.4 | EVGVYEALKDDSWLK                 | 876.4460  | 2 | 54  | y4     | 62.3  | 116.3 |
| 2386 | IPI00336324.4 | FVEGLPINDFSR                    | 697.3683  | 2 | 33  | P y7   | 61.35 | 94.4  |
| 2387 | IPI00336324.4 | FVEGLPINDFSR                    | 697.3683  | 2 | 49  | P y7   | 77.6  | 126.6 |
| 2388 | IPI00336324.4 | GEFITTVQQR                      | 589.8125  | 2 | 55  | y6     | 25.35 | 80.4  |
| 2389 | IPI00336324.4 | LGVTTADDVK                      | 917.5253  | 1 | 36  | b7     | 12.85 | 48.9  |
| 2390 | IPI00336324.4 | LSSAMSAK                        | 865.4571  | 1 | 26  |        | 0     | 26.0  |
| 2391 | IPI00336324.4 | NVWGNHSSSTQYDPVNHAK             | 760.7265  | 3 | 18  |        | 0     | 18.0  |
| 2392 | IPI00336324.4 | NVWGNHSSSTQYDPVNHAK             | 761.0562  | 3 | 23  |        | 0     | 23.0  |
| 2393 | IPI00336324.4 | SQGTALEK                        | 417.2217  | 2 | 18  | y6     | 41    | 59.0  |
| 2394 | IPI00336324.4 | SQIALK                          | 330.2081  | 2 | 34  | c b5   | 14.55 | 48.6  |
| 2395 | IPI00307837.3 | EVSTYIK                         | 420.2290  | 2 | 23  | y5     | 44.5  | 67.5  |
| 2396 | IPI00307837.3 | EVSTYIKK                        | 484.2766  | 2 | 29  |        | 0     | 29.0  |
| 2397 | IPI00307837.3 | IGGIGTVPVGR                     | 513.3093  | 2 | 60  | P y4   | 44.5  | 104.5 |
| 2398 | IPI00307837.3 | IGYNPDTVAFVPIGWNGDNMLEPSANMPWFK | 1190.2358 | 3 | 31  | b8     | 5.55  | 36.6  |
| 2399 | IPI00307837.3 | IGYNPDTVAFVPIGWNGDNMLEPSANMPWFK | 1190.2362 | 3 | 37  | y++16  | 2.85  | 39.9  |
| 2400 | IPI00307837.3 | KLEDGPK                         | 393.7218  | 2 | 19  | y6     | 29.45 | 48.5  |
| 2401 | IPI00307837.3 | LLAYTLGVK                       | 489.2748  | 2 | 27  | c b5   | 1.4   | 28.4  |
| 2402 | IPI00307837.3 | STTTGHLIYK                      | 560.8038  | 2 | 46  | y6     | 52.95 | 99.0  |
| 2403 | IPI00307837.3 | VAVGVK                          | 685.4605  | 1 | 24  |        | 0     | 24.0  |
| 2404 | IPI00307837.3 | YYVTIIDAPGHR                    | 702.8708  | 2 | 57  | y7     | 46.75 | 103.8 |
| 2405 | IPI00126184.4 | FSSSTFEQVNLVK                   | 807.4123  | 2 | 68  | y7     | 5.85  | 73.9  |
| 2406 | IPI00126184.4 | FSSSTFEQVNLVK                   | 807.4120  | 2 | 87  | y8     | 21.2  | 108.2 |
| 2407 | IPI00131204.1 | AMSQDGASQFQEVILQELELSVKK        | 893.7965  | 3 | 23  | b5     | 29.45 | 52.5  |
| 2408 | IPI00131204.1 | GGTLTQYEGK                      | 527.2649  | 2 | 49  | y6     | 52.95 | 102.0 |
| 2409 | IPI00131204.1 | IFNTNNLWISLGAVK                 | 845.9714  | 2 | 101 | y6     | 49.6  | 150.6 |
| 2410 | IPI00131204.1 | ILTTAASHEFEHTKK                 | 571.6374  | 3 | 16  |        | 0     | 16.0  |
| 2411 | IPI00131204.1 | IQRPPEDSIQPYEK                  | 567.2934  | 3 | 43  |        | 0     | 43.0  |
| 2412 | IPI00131204.1 | IYTFNQSR                        | 514.7616  | 2 | 34  | y5     | 36.1  | 70.1  |
| 2413 | IPI00131204.1 | NENTFLDLTVQQIEHLNK              | 719.7084  | 3 | 16  |        | 0     | 16.0  |
| 2414 | IPI00128556.1 | AAEAGADLVMLDNFKPEELHPTAATLK     | 951.8214  | 3 | 58  | P y7   | 33.75 | 91.8  |
| 2415 | IPI00128556.1 | DNHVVAAGSMER                    | 429.2033  | 3 | 29  | y5     | 7.1   | 36.1  |
| 2416 | IPI00128556.1 | GPAHLLLLGER                     | 400.5600  | 3 | 31  | y4     | 15.6  | 46.6  |

|      |               |                           |           |   |     |       |       |       |
|------|---------------|---------------------------|-----------|---|-----|-------|-------|-------|
| 2417 | IPI00128556.1 | GPAHLLLLGER               | 600.3368  | 2 | 46  | y7    | 90.2  | 136.2 |
| 2418 | IPI00128556.1 | LFAEGDTPVPHAR             | 470.5777  | 3 | 27  | P y4  | 41    | 68.0  |
| 2419 | IPI00128556.1 | LFAEGDTPVPHAR             | 705.3729  | 2 | 48  | P y4  | 29.45 | 77.5  |
| 2420 | IPI00128556.1 | QAAGFSLK                  | 411.2293  | 2 | 30  |       | 0     | 30.0  |
| 2421 | IPI00128556.1 | VALNTLAR                  | 429.2643  | 2 | 63  | y5    | 38.2  | 101.2 |
| 2422 | IPI00378416.1 | DISSAVQANPALTELSLR        | 943.5071  | 2 | 55  | P y9  | 28.95 | 84.0  |
| 2423 | IPI00378416.1 | DISSAVQANPALTELSLR        | 943.5071  | 2 | 56  | P y9  | 61.2  | 117.2 |
| 2424 | IPI00378416.1 | DISSAVQANPALTELSLR        | 943.0060  | 2 | 78  | P y9  | 28.95 | 107.0 |
| 2425 | IPI00224784.1 | RVAEDEDVVDTKK             | 583.9308  | 3 | 102 | c b6  | 33.75 | 135.8 |
| 2426 | IPI00131406.1 | ALLEVVQSGGK               | 550.8196  | 2 | 67  | y8    | 46.75 | 113.8 |
| 2427 | IPI00131406.1 | LTVEDPVTVEYITR            | 817.9353  | 2 | 74  | y5    | 25.35 | 99.4  |
| 2428 | IPI00407543.1 | EILVGDVGTVDVDDPYTTFVK     | 1099.0588 | 2 | 93  | P y7  | 65.15 | 158.2 |
| 2429 | IPI00407543.1 | ESKKEDLVFIFWAPENAPLK      | 788.0876  | 3 | 26  | P y7  | 77.6  | 103.6 |
| 2430 | IPI00407543.1 | MIYASSK                   | 400.2047  | 2 | 19  | y5    | 52.95 | 72.0  |
| 2431 | IPI00407543.1 | YALYDATYETK               | 669.3250  | 2 | 47  | y8    | 73.4  | 120.4 |
| 2432 | IPI00137331.4 | GAVPYVQAFDSL LANPVAEYLK   | 1183.6311 | 2 | 84  | c b9  | 5.15  | 89.2  |
| 2433 | IPI00137331.4 | HAEMVHTGLK                | 561.7904  | 2 | 45  | y8    | 73.4  | 118.4 |
| 2434 | IPI00137331.4 | SSEMNVLIPTEGGDFNEFPVPEQFK | 938.4444  | 3 | 20  | b8 P  | 12.15 | 32.2  |
| 2435 | IPI00314225.2 | QEAFLNPAIGPEGLSGSSR       | 1015.5273 | 2 | 74  | y10   | 26.5  | 100.5 |
| 2436 | IPI00314225.2 | VIPTALLSLLL               | 654.9353  | 2 | 63  |       | 0     | 63.0  |
| 2437 | IPI00133066.1 | ITMKRM                    | 398.2128  | 2 | 28  |       | 0     | 28.0  |
| 2438 | IPI00133066.1 | LQEVIELLSLEK              | 757.9459  | 2 | 68  | y5    | 29.45 | 97.5  |
| 2439 | IPI00133066.1 | LQEVIELLSLEK              | 758.4438  | 2 | 70  | y4    | 41    | 111.0 |
| 2440 | IPI00133066.1 | SRVVEHNIR                 | 370.5442  | 3 | 27  | c b5  | 25.35 | 52.4  |
| 2441 | gij547749     | ELTTEIDNNIEQISSYK         | 998.9934  | 2 | 63  | y7    | 44.3  | 107.3 |
| 2442 | gij547749     | SLLEGE GSSGGGGR           | 631.8023  | 2 | 66  | y10   | 28.95 | 95.0  |
| 2443 | IPI00125658.3 | EGVFPGLIPILNSYLENMEVDVDTR | 941.1451  | 3 | 29  | b8 P  | 5.35  | 34.4  |
| 2444 | IPI00125658.3 | EGVFPGLIPILNSYLENMEVDVDTR | 941.1450  | 3 | 29  | b8 P  | 12.15 | 41.2  |
| 2445 | IPI00125658.3 | EGVFPGLIPILNSYLENMEVDVDTR | 941.1453  | 3 | 37  | b8 P  | 5.35  | 42.4  |
| 2446 | IPI00125658.3 | GLLSQGSPLSWEETQR          | 894.9502  | 2 | 42  | y5    | 25.35 | 67.4  |
| 2447 | IPI00125658.3 | LDFLIPLSK                 | 523.3183  | 2 | 40  | y5    | 69.75 | 109.8 |
| 2448 | IPI00125658.3 | LTIDK                     | 589.3558  | 1 | 19  | b4    | 29.45 | 48.5  |
| 2449 | IPI00125658.3 | VQLLLNGGDVLETLQEK         | 935.0202  | 2 | 72  | y5    | 49.1  | 121.1 |
| 2450 | IPI00125658.3 | VVINVPFIK                 | 514.8289  | 2 | 25  | y6    | 38.2  | 63.2  |
| 2451 | IPI00125515.1 | ESVQVPDDQDFR              | 717.8338  | 2 | 18  | P y7  | 46.75 | 64.8  |
| 2452 | IPI00125515.1 | NRDVITLR                  | 493.7906  | 2 | 44  | y6    | 14.55 | 58.6  |
| 2453 | IPI00125515.1 | PAASTEPQGSRPALGR          | 532.2811  | 3 | 27  | y++13 | 40.2  | 67.2  |
| 2454 | IPI00125515.1 | SSQFLAPK                  | 439.2427  | 2 | 38  | c b6  | 1.25  | 39.3  |
| 2455 | IPI00125515.1 | SWLPMGADYIIMNYSVK         | 663.6603  | 3 | 44  | y7    | 49.6  | 93.6  |
| 2456 | IPI00125515.1 | SWLPMGADYIIMNYSVK         | 994.4877  | 2 | 49  | y6    | 46.75 | 95.8  |
| 2457 | IPI00125515.1 | SWLPMGADYIIMNYSVK         | 994.9858  | 2 | 56  | y6    | 49.6  | 105.6 |

|      |               |                              |           |   |    |        |       |       |
|------|---------------|------------------------------|-----------|---|----|--------|-------|-------|
| 2458 | IPI00340989.2 | ENIQVFELPSEDMK               | 977.9597  | 2 | 46 | P y6   | 41    | 87.0  |
| 2459 | IPI00340989.2 | ENIQVFELPSEDMK               | 978.4589  | 2 | 52 | P y6   | 52.95 | 105.0 |
| 2460 | IPI00340989.2 | HIDTAYVYQTENHVGQAIR          | 739.3943  | 3 | 51 | y5     | 25.35 | 76.4  |
| 2461 | IPI00340989.2 | HIDTAYVYQTENHVGQAIR          | 739.3683  | 3 | 55 | y++16  | 32.85 | 87.9  |
| 2462 | IPI00340989.2 | ILNKPGLK                     | 441.7925  | 2 | 30 | P y4   | 83.9  | 113.9 |
| 2463 | IPI00340989.2 | SIGVSNFNSR                   | 540.7753  | 2 | 37 | y6     | 52.95 | 90.0  |
| 2464 | IPI00118892.4 | FSLVGIAGQDLNEG NR            | 845.4306  | 2 | 69 | y5     | 27.2  | 96.2  |
| 2465 | IPI00118892.4 | VNDDIIVNWVNTTLK              | 872.9683  | 2 | 58 | y5     | 52.95 | 111.0 |
| 2466 | IPI00118892.4 | YAFVNWINK                    | 578.3127  | 2 | 19 | y7     | 65.15 | 84.2  |
| 2467 | IPI00118892.4 | YAFVNWINK                    | 577.8107  | 2 | 39 | c b4   | 27.95 | 67.0  |
| 2468 | IPI00310240.1 | DAYERDLESDIIGDTS GHFQK       | 799.7063  | 3 | 22 |        | 0     | 22.0  |
| 2469 | IPI00310240.1 | DAYERDLESDIIGDTS GHFQK       | 799.7060  | 3 | 35 | y9     | 52.75 | 87.8  |
| 2470 | IPI00310240.1 | ESILELITSR                   | 580.8300  | 2 | 45 | y4     | 6.6   | 51.6  |
| 2471 | IPI00310240.1 | GSVHDFPEFDANQDAEALYTAMK      | 852.7157  | 3 | 35 | y7     | 46.75 | 81.8  |
| 2472 | IPI00310240.1 | GSVHDFPEFDANQDAEALYTAMK      | 853.0505  | 3 | 43 |        | 0     | 43.0  |
| 2473 | IPI00310240.1 | TLIEILATR                    | 515.3236  | 2 | 26 | y7     | 46.75 | 72.8  |
| 2474 | IPI00310240.1 | WGTDEAQFIYILGNR              | 891.9465  | 2 | 55 | y6     | 5.85  | 60.9  |
| 2475 | IPI00222515.1 | EQSILELGSLLAK                | 700.9069  | 2 | 46 | y6     | 41    | 87.0  |
| 2476 | IPI00222515.1 | IMLNTPEDVQALVSGK             | 857.9546  | 2 | 83 | c b5 P | 41    | 124.0 |
| 2477 | IPI00222515.1 | ISSLIKLSK                    | 494.7881  | 2 | 26 | y5     | 25.35 | 51.4  |
| 2478 | IPI00342230.2 | KVVXKASKGPLK                 | 621.3283  | 2 | 16 | y7     | 5.55  | 21.6  |
| 2479 | IPI00342230.2 | KVVXKASKGPLK                 | 621.3284  | 2 | 28 | y7     | 5.55  | 33.6  |
| 2480 | IPI00342230.2 | LISWYDNEYGYSNR               | 890.4021  | 2 | 61 | y5     | 23.75 | 84.8  |
| 2481 | IPI00129528.1 | ENPSANYTTMMK                 | 693.8069  | 2 | 44 | y7     | 73.4  | 117.4 |
| 2482 | IPI00129528.1 | RVPFMELIIPGITNGVEMLNNMPSPR   | 976.5128  | 3 | 24 | y5     | 49.6  | 73.6  |
| 2483 | IPI00129528.1 | RVPFMELIIPGITNGVEMLNNMPSPR   | 976.5125  | 3 | 32 | y5     | 18.5  | 50.5  |
| 2484 | IPI00129528.1 | RVPFMELIIPGITNGVEMLNNMPSPR   | 976.1781  | 3 | 37 | y5     | 25.35 | 62.4  |
| 2485 | IPI00129528.1 | SGTTWVSEILDLYNNGDAEK         | 1163.5722 | 2 | 64 | y8     | 66.55 | 130.6 |
| 2486 | IPI00115850.1 | AELGIPLEEVDLNEMDYLTR         | 1161.0765 | 2 | 40 | y7     | 15.6  | 55.6  |
| 2487 | IPI00115850.1 | AFSVFLFNTENK                 | 708.8627  | 2 | 70 | y6     | 49.6  | 119.6 |
| 2488 | IPI00115850.1 | NVTLNPD PNEIK                | 677.3560  | 2 | 54 | P y7   | 61.35 | 115.4 |
| 2489 | IPI00331644.3 | AVENSSTAIGIR                 | 609.3281  | 2 | 74 | c b9   | 5.15  | 79.2  |
| 2490 | IPI00331644.3 | GRHEIVPK                     | 312.5191  | 3 | 33 | c b5   | 23.35 | 56.4  |
| 2491 | IPI00331644.3 | IYIVHDEVK                    | 410.2359  | 3 | 23 |        | 0     | 23.0  |
| 2492 | IPI00331644.3 | RLFNVDR                      | 460.2590  | 2 | 28 | c b6   | 23.75 | 51.8  |
| 2493 | IPI00331644.3 | SLADIAREEASNFR               | 526.9348  | 3 | 32 | y++9   | 35.8  | 67.8  |
| 2494 | IPI00331644.3 | SLADIAREEASNFR               | 790.3971  | 2 | 33 | y5     | 27.2  | 60.2  |
| 2495 | IPI00331644.3 | SLADIAREEASNFR               | 789.8973  | 2 | 46 | y7     | 23.75 | 69.8  |
| 2496 | IPI00118344.1 | GMDQRIGNK                    | 510.2722  | 2 | 28 |        | 0     | 28.0  |
| 2497 | IPI00118344.1 | IFDANTKPNLNLQVLSNPEFLAEGTAIK | 1020.2124 | 3 | 52 |        | 0     | 52.0  |
| 2498 | IPI00118344.1 | ILTTNTWSSSELSK               | 740.4159  | 2 | 42 | y++11  | 12.85 | 54.9  |

|      |               |                                  |           |   |    |        |        |       |
|------|---------------|----------------------------------|-----------|---|----|--------|--------|-------|
| 2499 | IPI00118344.1 | VLIGGETPEGQK                     | 671.8475  | 2 | 42 | P y5   | 38.2   | 80.2  |
| 2500 | IPI00118344.1 | VTVVDVNEAR                       | 551.2984  | 2 | 59 | y6     | 25.35  | 84.4  |
| 2501 | IPI00277112.2 | LNATNIELATVQPGQNFHMFTK           | 825.4901  | 3 | 49 |        | 0      | 49.0  |
| 2502 | IPI00277112.2 | LNATNIELATVQPGQNFHMFTK           | 825.7548  | 3 | 55 | y++13  | 27.7   | 82.7  |
| 2503 | IPI00277112.2 | MFLTR                            | 709.3692  | 1 | 19 |        | 0      | 19.0  |
| 2504 | IPI00277112.2 | SSLILK                           | 387.2603  | 2 | 50 | y4     | 57.05  | 107.1 |
| 2505 | IPI00330685.4 | APHLTHLR                         | 315.5192  | 3 | 18 | y4     | 9.55   | 27.6  |
| 2506 | IPI00330685.4 | APHLTHLR                         | 472.7750  | 2 | 25 |        | 0      | 25.0  |
| 2507 | IPI00330685.4 | EIVPVLVSSR                       | 549.8293  | 2 | 24 | P y7   | 33.75  | 57.8  |
| 2508 | IPI00330685.4 | HGSNLEAMGK                       | 522.2504  | 2 | 49 | y8     | 31.95  | 81.0  |
| 2509 | IPI00330685.4 | ILVTLHTLER                       | 436.6064  | 3 | 25 |        | 0      | 25.0  |
| 2510 | IPI00330685.4 | ILVTLHTLER                       | 654.4218  | 2 | 44 | y6     | 5.85   | 49.9  |
| 2511 | IPI00330685.4 | IVSWSQAGVEPSVMGVGPIPAIK          | 1162.1324 | 2 | 47 | P y4   | 41     | 88.0  |
| 2512 | IPI00330685.4 | KWQVSR                           | 402.2301  | 2 | 29 | y5     | 38.2   | 67.2  |
| 2513 | IPI00330685.4 | LKPYFLTDGTGTVTTANATGMNDGAAAVVLMK | 1077.2174 | 3 | 53 | y9     | 31.95  | 85.0  |
| 2514 | IPI00330685.4 | TAIGSFNGALSTVPVHEMGTTVIK         | 811.0977  | 3 | 18 | y7     | 5.85   | 23.9  |
| 2515 | IPI00330685.4 | VAVLSQNR                         | 443.7593  | 2 | 42 | y4     | 15.6   | 57.6  |
| 2516 | IPI00127560.1 | GSPAVDVAVK                       | 471.7668  | 2 | 20 | y5     | 69.75  | 89.8  |
| 2517 | IPI00127560.1 | TAESGELHGLTTDEK                  | 794.3904  | 2 | 76 | y7     | 22.4   | 98.4  |
| 2518 | IPI00127560.1 | TLGISPFHEFADVFTANDSGHR           | 840.0776  | 3 | 30 | y6     | 27.2   | 57.2  |
| 2519 | IPI00127560.1 | TLGISPFHEFADVFTANDSGHR           | 840.0775  | 3 | 37 | y8     | 20.1   | 57.1  |
| 2520 | IPI00408961.1 | DLGTQLAPIQEFFHSEQYR              | 798.4030  | 3 | 21 | b6     | 7.1    | 28.1  |
| 2521 | IPI00408961.1 | IMFVGGPNTRK                      | 407.2256  | 3 | 18 | y7     | 0.2    | 18.2  |
| 2522 | IPI00408961.1 | IMFVGGPNTRK                      | 610.3350  | 2 | 25 | y9     | 21.2   | 46.2  |
| 2523 | IPI00408961.1 | LMHQEQLK                         | 513.7743  | 2 | 15 | y5     | 25.35  | 40.4  |
| 2524 | IPI00408961.1 | LMHQEQLK                         | 342.8516  | 3 | 16 |        | 0      | 16.0  |
| 2525 | IPI00127942.1 | HEYQANGPEDLNR                    | 514.9028  | 3 | 45 |        | 0      | 45.0  |
| 2526 | IPI00127942.1 | HEYQANGPEDLNR                    | 771.8532  | 2 | 66 | c b7 P | 1.4    | 67.4  |
| 2527 | IPI00127942.1 | HFGMLPEK                         | 529.2787  | 2 | 26 | y8     | 44.3   | 70.3  |
| 2528 | IPI00127942.1 | YALYDASFETK                      | 654.3172  | 2 | 55 | y7     | 49.6   | 104.6 |
| 2529 | IPI00318577.1 | ALGKDDFTK                        | 497.7646  | 2 | 32 | y7     | 61.35  | 93.4  |
| 2530 | IPI00318577.1 | FVAVTSTNAAK                      | 554.8038  | 2 | 33 | y9     | 66.55  | 99.6  |
| 2531 | IPI00318577.1 | GSSLIEAFETWR                     | 698.3509  | 2 | 55 |        | 0      | 55.0  |
| 2532 | IPI00318577.1 | IPNGVNGVEDR                      | 585.2993  | 2 | 65 | y6     | 25.35  | 90.4  |
| 2533 | IPI00318577.1 | MDENRFVAVTSTNAAK                 | 585.6235  | 3 | 17 | y7     | 38.2   | 55.2  |
| 2534 | IPI00318577.1 | RAGNVVYGEPIAAGLTDGR              | 658.3472  | 3 | 46 | y5     | 14.55  | 60.6  |
| 2535 | IPI00379621.1 | HTGPGILSMANAGPNTNGSQLFICTAK      | 920.7748  | 3 | 20 |        | 0      | 20.0  |
| 2536 | IPI00379621.1 | TEWLDGK                          | 424.7115  | 2 | 28 | y5     | 111.85 | 139.9 |
| 2537 | IPI00126048.1 | ETIEDVEEMLNNLPGVTSVHSR           | 824.0722  | 3 | 74 | P y9   | 20.1   | 94.1  |
| 2538 | IPI00126048.1 | QMTDPNVALTFLEK                   | 803.9092  | 2 | 44 | y7     | 22.4   | 66.4  |
| 2539 | IPI00126048.1 | VLDLQQIK                         | 478.7925  | 2 | 37 | y6     | 65.15  | 102.2 |

|      |               |                                    |           |   |    |        |        |       |
|------|---------------|------------------------------------|-----------|---|----|--------|--------|-------|
| 2540 | IPI00126048.1 | VNPLSLVEIILHVVR                    | 567.6857  | 3 | 20 |        | 0      | 20.0  |
| 2541 | IPI00353180.2 | DNFGIGELMTTVHAIATQK                | 735.4306  | 3 | 27 | y8     | 42.15  | 69.2  |
| 2542 | IPI00353180.2 | DNFGIGELMTTVHAIATQK                | 735.4284  | 3 | 41 |        | 0      | 41.0  |
| 2543 | IPI00320217.3 | FWQDLMNIAGTTLSSK                   | 906.4545  | 2 | 59 | y7     | 49.6   | 108.6 |
| 2544 | IPI00320217.3 | ILIAN TGMDTDK                      | 646.3368  | 2 | 59 | y8     | 61.35  | 120.4 |
| 2545 | IPI00408378.1 | TAFDEAIAELDTLNEDSYK                | 1073.4983 | 2 | 74 | y6     | 69.75  | 143.8 |
| 2546 | IPI00408378.1 | TAFDEAIAELDTLNEDSYKDSTLIMQLLR      | 1106.2123 | 3 | 20 | y++16  | 31.7   | 51.7  |
| 2547 | IPI00114628.1 | DYLTTYYSFHSGPVAEQEIVK              | 816.7326  | 3 | 44 | y6     | 35.8   | 79.8  |
| 2548 | IPI00114628.1 | DYLTTYYSFHSGPVAEQEIVK              | 816.3975  | 3 | 44 | y6     | 13.65  | 57.7  |
| 2549 | IPI00114628.1 | EIIVTDYTPQNLQELQK                  | 1017.0364 | 2 | 45 | y++14  | 10.05  | 55.1  |
| 2550 | IPI00114628.1 | EIIVTDYTPQNLQELQK                  | 1017.0364 | 2 | 46 | c b8 P | 5.55   | 51.6  |
| 2551 | IPI00114628.1 | FQHVMVGP                           | 553.7765  | 2 | 27 | y7     | 108.75 | 135.8 |
| 2552 | IPI00114628.1 | FSGVYLEK                           | 471.7505  | 2 | 32 | y6     | 52.95  | 85.0  |
| 2553 | IPI00114628.1 | KFSGVYLEK                          | 535.7985  | 2 | 36 | y7     | 33.75  | 69.8  |
| 2554 | IPI00114628.1 | LAGLLKPGGHLVTLVTLR                 | 465.2968  | 4 | 20 |        | 0      | 20.0  |
| 2555 | IPI00345821.2 | ALALXNNSTMGYMM                     | 529.6198  | 3 | 18 |        | 0      | 18.0  |
| 2556 | IPI00345821.2 | ELISNASDALDK                       | 638.3239  | 2 | 52 | y8     | 31.95  | 84.0  |
| 2557 | IPI00345821.2 | VKAMLWTMNNQAEIAQLMSLIINTFYXNKEIFLR | 684.1871  | 6 | 17 |        | 0      | 17.0  |
| 2558 | IPI00343810.2 | GAELEDSVLDVVRK                     | 765.4221  | 2 | 16 | y8     | 5.15   | 21.2  |
| 2559 | IPI00343810.2 | GAELEDSVLDVVRK                     | 765.4220  | 2 | 17 | y8     | 2.15   | 19.2  |
| 2560 | IPI00271562.2 | ALQTTYGTNAPR                       | 646.8335  | 2 | 59 | y6     | 38.2   | 97.2  |
| 2561 | IPI00271562.2 | FYAYNPLAGGLLTGK                    | 793.4254  | 2 | 44 | P y10  | 48.5   | 92.5  |
| 2562 | IPI00271562.2 | RMDASASAASVR                       | 611.3045  | 2 | 58 | y9     | 28.95  | 87.0  |
| 2563 | IPI00271562.2 | SIRSQLETSK                         | 631.7805  | 2 | 18 | c b6   | 1.4    | 19.4  |
| 2564 | IPI00271562.2 | VDLFYLHAPDHSTPVEETLR               | 585.5525  | 4 | 19 |        | 0      | 19.0  |
| 2565 | sp P15636     | VGEFKLRXLTKV                       | 693.8915  | 2 | 18 | c b5   | 1.05   | 19.1  |
| 2566 | sp P15636     | VGEFKLRXLTKV                       | 693.8915  | 2 | 20 | c b6   | 1.25   | 21.3  |
| 2567 | sp P15636     | VGEFKLRXLTKV                       | 693.8915  | 2 | 20 | y4     | 29.45  | 49.5  |
| 2568 | IPI00134131.2 | HSVNNNTYSQFQDEYSLEEVMK             | 850.3822  | 3 | 38 | y7     | 33.75  | 71.8  |
| 2569 | IPI00134131.2 | HSVNNNTYSQFQDEYSLEEVMK             | 850.3823  | 3 | 47 | y7     | 33.75  | 80.8  |
| 2570 | IPI00134131.2 | KLEEEGEQFVK                        | 668.3417  | 2 | 52 | y6     | 52.95  | 105.0 |
| 2571 | IPI00134131.2 | LQNLQLQPGK                         | 569.8334  | 2 | 45 | c b7 P | 49.6   | 94.6  |
| 2572 | IPI00134131.2 | MNPQSAFFQGK                        | 627.8058  | 2 | 17 | y7     | 35.8   | 52.8  |
| 2573 | IPI00134131.2 | RQVPGAK                            | 378.2301  | 2 | 29 | c b6   | 25.35  | 54.4  |
| 2574 | IPI00134131.2 | WVINPSGGLISK                       | 635.8617  | 2 | 25 | y10    | 61.2   | 86.2  |
| 2575 | IPI00134131.2 | YGLSAHPITPQMFGYAGK                 | 646.6601  | 3 | 22 | c b9 P | 4.95   | 27.0  |
| 2576 | IPI00134131.2 | YGLSAHPITPQMFGYAGK                 | 646.9955  | 3 | 37 | c b9 P | 19.15  | 56.2  |
| 2577 | IPI00118678.1 | NLIINADELGR                        | 614.8182  | 2 | 24 | y7     | 23.75  | 47.8  |
| 2578 | IPI00118678.1 | SLLVIPNTLAVNAAQDSTDLVAK            | 1177.6537 | 2 | 46 | c b4   | 11.15  | 57.2  |
| 2579 | IPI00118678.1 | SLLVIPNTLAVNAAQDSTDLVAK            | 1177.6535 | 2 | 68 |        | 0      | 68.0  |
| 2580 | IPI00322312.1 | AEEYEFLTPMEEAPK                    | 892.4091  | 2 | 47 | P y7   | 82.65  | 129.7 |

|      |               |                                          |           |   |    |        |       |       |
|------|---------------|------------------------------------------|-----------|---|----|--------|-------|-------|
| 2581 | IPI00322312.1 | SIQEIQELDKDDESLRK                        | 682.6929  | 3 | 26 | y++8   | 27.2  | 53.2  |
| 2582 | IPI00322312.1 | VAVSADPNVNVIVTR                          | 825.9616  | 2 | 68 | P y7   | 22.4  | 90.4  |
| 2583 | IPI00230043.1 | GVVQDLQQAISK                             | 643.3717  | 2 | 55 | y8     | 44.3  | 99.3  |
| 2584 | IPI00230043.1 | ITSLEVENQNLR                             | 708.3881  | 2 | 66 | y6     | 23.75 | 89.8  |
| 2585 | IPI00133206.1 | AMEVDERPTEQYSDIGGLDK                     | 752.0169  | 3 | 23 |        | 0     | 23.0  |
| 2586 | IPI00133206.1 | LAGPQLVQMFIGDGAK                         | 822.9426  | 2 | 40 | y5     | 38.2  | 78.2  |
| 2587 | IPI00133206.1 | MATVWDEAEQDGIGEEVLK                      | 1061.0003 | 2 | 46 | y++17  | 14.9  | 60.9  |
| 2588 | IPI00133206.1 | MSTEEIVQ                                 | 468.7615  | 2 | 29 | b6     | 38.2  | 67.2  |
| 2589 | IPI00133206.1 | QTYFLPVIGLVDAEK                          | 846.9654  | 2 | 37 | y7     | 22.4  | 59.4  |
| 2590 | IPI00133206.1 | QTYFLPVIGLVDAEK                          | 846.9653  | 2 | 50 |        | 0     | 50.0  |
| 2591 | IPI00124372.1 | ERKDEIATVETINNGK                         | 606.3178  | 3 | 45 | y7     | 23.75 | 68.8  |
| 2592 | IPI00124372.1 | EVNLAVENAK                               | 543.7933  | 2 | 44 | y6     | 14.55 | 58.6  |
| 2593 | IPI00124372.1 | GGARVEPVDASGTEK                          | 491.5832  | 3 | 30 | y7     | 35.8  | 65.8  |
| 2594 | IPI00124372.1 | GVKPITLLEGGK                             | 404.5836  | 3 | 39 |        | 0     | 39.0  |
| 2595 | IPI00124372.1 | IMEMSAK                                  | 405.1985  | 2 | 22 | y5     | 52.95 | 75.0  |
| 2596 | IPI00124372.1 | ISFTGSVPTGVK                             | 596.8332  | 2 | 34 |        | 0     | 34.0  |
| 2597 | IPI00124372.1 | LGDPLLEDTR                               | 564.7990  | 2 | 78 | P y7   | 22.4  | 100.4 |
| 2598 | IPI00124372.1 | MGPLINAPHLER                             | 449.9116  | 3 | 31 | c b5   | 8.5   | 39.5  |
| 2599 | IPI00124372.1 | STGTFVVSQPLNYR                           | 806.4143  | 2 | 26 | y++11  | 11.55 | 37.6  |
| 2600 | IPI00344912.1 | FTEQADLSGITEAK                           | 755.8916  | 2 | 16 | y5     | 25.35 | 41.4  |
| 2601 | IPI00344912.1 | KLSVSQVVHK                               | 375.5648  | 3 | 35 | y4     | 16.9  | 51.9  |
| 2602 | IPI00344912.1 | KLSVSQVVHK                               | 562.8426  | 2 | 47 | y8     | 30.4  | 77.4  |
| 2603 | IPI00344912.1 | MQQVEASLQPETLRK                          | 586.6455  | 3 | 25 | P y6   | 5.85  | 30.9  |
| 2604 | IPI00344912.1 | NIVFSPLSISAALVSLGAK                      | 691.4100  | 3 | 18 | y5     | 52.95 | 71.0  |
| 2605 | IPI00344912.1 | NIVFSPLSISAALVSLGAK                      | 691.4099  | 3 | 21 | y5     | 89    | 110.0 |
| 2606 | IPI00344912.1 | TLFSSQIEELNLPK                           | 809.9367  | 2 | 39 | y7     | 23.75 | 62.8  |
| 2607 | IPI00131845.1 | AINQGGLTSVAVR                            | 643.3665  | 2 | 82 | y9     | 11    | 93.0  |
| 2608 | IPI00131845.1 | LLDSSTVTHLFK                             | 454.2538  | 3 | 17 |        | 0     | 17.0  |
| 2609 | IPI00131845.1 | QTESTSFLEK                               | 585.2872  | 2 | 28 | y5     | 75.6  | 103.6 |
| 2610 | IPI00228253.1 | AGHFDK                                   | 337.6665  | 2 | 39 | c b5   | 49.1  | 88.1  |
| 2611 | IPI00228253.1 | MNAGSDPVVIVSAAR                          | 764.8932  | 2 | 49 |        | 0     | 49.0  |
| 2612 | IPI00129096.1 | ELDSNPFASLVFYWEPLNR                      | 1149.5692 | 2 | 41 | y5     | 7.7   | 48.7  |
| 2613 | IPI00129096.1 | ELDSNPFASLVFYWEPLNR                      | 1149.5697 | 2 | 41 |        | 0     | 41.0  |
| 2614 | IPI00129096.1 | KNEELGQLYQDQEVKPEYWGYYILYPQVMEFWQGQTNR   | 1191.5784 | 4 | 22 | y5     | 6.2   | 28.2  |
| 2615 | IPI00129096.1 | SSQIGAVVSR                               | 502.2803  | 2 | 63 | y6     | 89    | 152.0 |
| 2616 | IPI00315299.3 | NLNQALLDLHALGSAR                         | 569.3166  | 3 | 33 | b4     | 18.5  | 51.5  |
| 2617 | IPI00315299.3 | TQEAMEAALAMEK                            | 711.8437  | 2 | 81 | y4     | 75.6  | 156.6 |
| 2618 | IPI00270326.1 | ESDTGLAPPALWDLAADK                       | 935.4655  | 2 | 22 | c b7 P | 6.2   | 28.2  |
| 2619 | IPI00270326.1 | ESDTGLAPPALWDLAADK                       | 935.4653  | 2 | 35 | c b7 P | 46.75 | 81.8  |
| 2620 | IPI00270326.1 | TMLELINQLDGFDP                           | 881.4478  | 2 | 41 | y5     | 9.55  | 50.6  |
| 2621 | IPI00130530.1 | GDVVNQEDLYQALASGQIAAAGLDVTTPEPLPPSHPLTLK | 1060.7972 | 4 | 50 |        | 0     | 50.0  |



|      |               |                               |           |   |    |      |       |       |
|------|---------------|-------------------------------|-----------|---|----|------|-------|-------|
| 2622 | IPI00130530.1 | RLPEAIEEVK                    | 592.3380  | 2 | 32 | b7   | 58.1  | 90.1  |
| 2623 | IPI00130530.1 | VFTGGLPAEGR                   | 621.8459  | 2 | 37 | P y7 | 13.65 | 50.7  |
| 2624 | IPI00323592.1 | VAVLGASGGIGQPLSLLK            | 897.5527  | 2 | 44 | y9   | 38.5  | 82.5  |
| 2625 | IPI00323592.1 | VAVLGASGGIGQPLSLLK            | 897.5526  | 2 | 64 | y9   | 18.3  | 82.3  |
| 2626 | IPI00129512.3 | IATVTEK                       | 381.2239  | 2 | 30 | y6   | 25.35 | 55.4  |
| 2627 | IPI00129512.3 | QPVLSQTEAR                    | 564.8046  | 2 | 37 | y6   | 35.8  | 72.8  |
| 2628 | IPI00129512.3 | QVLGQMVIDEELLGDGHSYSR         | 815.4021  | 3 | 37 | y9   | 28.95 | 66.0  |
| 2629 | IPI00129512.3 | VNDSTMLGASGDYADFQYLK          | 1098.5028 | 2 | 67 | y7   | 35.8  | 102.8 |
| 2630 | IPI00121514.2 | AMADPEVQQIMSDPAMR             | 945.9347  | 2 | 54 | P y4 | 44.5  | 98.5  |
| 2631 | IPI00121514.2 | DPQALSEHLK                    | 569.2990  | 2 | 33 | y7   | 33.75 | 66.8  |
| 2632 | IPI00121514.2 | FMNPFNLPNLYQK                 | 813.4119  | 2 | 40 | P y6 | 52.95 | 93.0  |
| 2633 | IPI00121514.2 | HEANNLQLK                     | 533.7855  | 2 | 44 | y7   | 33.75 | 77.8  |
| 2634 | IPI00121514.2 | LAYINPDALALEEK                | 744.9231  | 2 | 34 | P y8 | 85.6  | 119.6 |
| 2635 | IPI00117914.1 | GPAALRK                       | 356.7270  | 2 | 28 | y4   | 7.1   | 35.1  |
| 2636 | IPI00117914.1 | TGLLSGLDIMEVNPTLGK            | 929.5026  | 2 | 29 | y6   | 35.8  | 64.8  |
| 2637 | IPI00117914.1 | TGLLSGLDIMEVNPTLGK            | 930.0085  | 2 | 56 | y9   | 52.75 | 108.8 |
| 2638 | IPI00117914.1 | VMEETFSYLLGR                  | 722.9466  | 2 | 55 | y4   | 27.2  | 82.2  |
| 2639 | IPI00269031.1 | IEQIEAGTPGR                   | 585.8101  | 2 | 62 | y5   | 25.35 | 87.4  |
| 2640 | IPI00269031.1 | VLVLDVFTPTPLGTR               | 814.4757  | 2 | 54 | P y7 | 22.4  | 76.4  |
| 2641 | IPI00279218.1 | TPVLLMLGQEDR                  | 686.3924  | 2 | 78 | y5   | 38.2  | 116.2 |
| 2642 | IPI00116643.2 | EVVQGIDADR                    | 562.2975  | 2 | 39 | y4   | 29.45 | 68.5  |
| 2643 | IPI00116643.2 | MIGLEDLIDDNYSK                | 813.3891  | 2 | 73 | y7   | 49.6  | 122.6 |
| 2644 | IPI00331146.3 | IVPVEITISLLK                  | 662.9268  | 2 | 37 |      | 0     | 37.0  |
| 2645 | IPI00331146.3 | IVPVEITISLLK                  | 662.9249  | 2 | 40 | y4   | 41    | 81.0  |
| 2646 | IPI00331146.3 | NPDSQYGELIEK                  | 696.8443  | 2 | 63 | y6   | 52.95 | 116.0 |
| 2647 | IPI00331146.3 | REMDQTMAANAQ                  | 684.3400  | 2 | 17 |      | 0     | 17.0  |
| 2648 | IPI00331146.3 | RIQTYLESTKPIIDLYEEMGK         | 843.4431  | 3 | 22 | b6   | 20.55 | 42.6  |
| 2649 | IPI00331146.3 | RIQTYLESTKPIIDLYEEMGK         | 843.1074  | 3 | 37 | b6   | 6.6   | 43.6  |
| 2650 | IPI00123223.1 | AVDQSVLLKPESELSPSWIYNLPGMQQNK | 1129.2562 | 3 | 44 | P y7 | 46.75 | 90.8  |
| 2651 | IPI00123223.1 | DGSYSAFGDQNGEREGNTWLTAFVLK    | 955.1192  | 3 | 41 | y7   | 22.4  | 63.4  |
| 2652 | IPI00123223.1 | FRVVSMKD                      | 491.2629  | 2 | 16 | c b7 | 12.15 | 28.2  |
| 2653 | IPI00123223.1 | LAGNQNK                       | 374.1978  | 2 | 17 |      | 0     | 17.0  |
| 2654 | IPI00123223.1 | MLRPLNELLPLAYIEDPKK           | 564.3239  | 4 | 20 | b7   | 6.2   | 26.2  |
| 2655 | IPI00123223.1 | NLFDELVLDK                    | 603.3254  | 2 | 44 | y8   | 90.2  | 134.2 |
| 2656 | IPI00123223.1 | SSGSLFNAMK                    | 578.2766  | 2 | 47 | y6   | 22.4  | 69.4  |
| 2657 | IPI00119239.1 | LAAIQESGVER                   | 586.8181  | 2 | 75 | y6   | 23.75 | 98.8  |
| 2658 | IPI00119239.1 | QVLLGDQIPK                    | 555.8297  | 2 | 45 |      | 0     | 45.0  |
| 2659 | IPI00230427.3 | ASVPEGFLSELTQQLAQATGK         | 1088.5703 | 2 | 51 | c b7 | 1.6   | 52.6  |
| 2660 | IPI00230427.3 | ASVPEGFLSELTQQLAQATGK         | 1088.5702 | 2 | 54 | y6   | 46.75 | 100.8 |
| 2661 | IPI00228819.3 | DGNLMFDQVPMVEIDGMK            | 1020.4691 | 2 | 28 | y6   | 49.6  | 77.6  |
| 2662 | IPI00314191.3 | EYGGLDVLVNNAGIAFK             | 890.9730  | 2 | 43 | y8   | 20.1  | 63.1  |

|      |               |                                |           |   |    |        |       |       |
|------|---------------|--------------------------------|-----------|---|----|--------|-------|-------|
| 2663 | IPI00314191.3 | GVHAEEGWPNSAYGVTK              | 601.2900  | 3 | 18 | c b8 P | 44.3  | 62.3  |
| 2664 | IPI00314191.3 | LQAEGLSPR                      | 485.7689  | 2 | 35 | y7     | 23.75 | 58.8  |
| 2665 | IPI00314191.3 | SPEEGAETPVYLALLPPDAEGPHGQFVQDK | 1064.8558 | 3 | 50 |        | 0     | 50.0  |
| 2666 | IPI00124181.1 | IIDKPR                         | 371.2355  | 2 | 19 |        | 0     | 19.0  |
| 2667 | IPI00124181.1 | NEVSFVIHNLPIIAK                | 847.4870  | 2 | 58 | P y5   | 89    | 147.0 |
| 2668 | IPI00124181.1 | PLGTQVAANAHQWLDNPEK            | 697.3658  | 3 | 40 | y++17  | 49.7  | 89.7  |
| 2669 | IPI00318970.5 | AANGVVLATEK                    | 536.8040  | 2 | 46 | y6     | 89    | 135.0 |
| 2670 | IPI00318970.5 | RYNEDLELEDIAHTAILTK            | 590.3148  | 4 | 18 | b5     | 15.6  | 33.6  |
| 2671 | IPI00318970.5 | RYNEDLELEDIAHTAILTK            | 786.7612  | 3 | 22 | y8     | 33.75 | 55.8  |
| 2672 | IPI00318970.5 | RYNEDLELEDIAHTAILTK            | 786.7501  | 3 | 40 | c b7   | 41    | 81.0  |
| 2673 | IPI00318970.5 | RYNEDLELEDIAHTAILTK            | 786.7501  | 3 | 44 | y8     | 46.75 | 90.8  |
| 2674 | IPI00318970.5 | SILYDER                        | 448.2302  | 2 | 19 | y5     | 38.2  | 57.2  |
| 2675 | IPI00377386.1 | NPISTMIC                       | 452.7399  | 2 | 18 | y4     | 1.05  | 19.1  |
| 2676 | IPI00119622.1 | FFNQLFSGLDPHALAGR              | 630.6822  | 3 | 45 | P y7   | 21.2  | 66.2  |
| 2677 | IPI00119622.1 | FFNQLFSGLDPHALAGR              | 631.0245  | 3 | 47 | y++13  | 48.5  | 95.5  |
| 2678 | IPI00119622.1 | HLLDGIQR                       | 476.2725  | 2 | 23 | y6     | 35.8  | 58.8  |
| 2679 | IPI00119622.1 | QLLDLELQSQGESR                 | 809.9367  | 2 | 25 |        | 0     | 25.0  |
| 2680 | IPI00119622.1 | RIDQAFALTR                     | 595.8359  | 2 | 44 | y7     | 22.4  | 66.4  |
| 2681 | IPI00130717.3 | VTESCITAVAAK                   | 625.3111  | 2 | 17 | c b8   | 1.95  | 19.0  |
| 2682 | IPI00331258.5 | AFSGYLGPDSEK                   | 635.8010  | 2 | 56 | y7     | 22.4  | 78.4  |
| 2683 | IPI00331258.5 | AYSGSQIDILIDQG                 | 494.2439  | 3 | 19 |        | 0     | 19.0  |
| 2684 | IPI00331258.5 | FAVYLPPQAESGK                  | 703.8844  | 2 | 26 | P y8   | 73.4  | 99.4  |
| 2685 | IPI00331258.5 | KIPVVFR                        | 429.7820  | 2 | 22 | P y5   | 97.85 | 119.9 |
| 2686 | IPI00331258.5 | LQEGYDHSYYFIATFIADHIR          | 854.0829  | 3 | 28 | y6     | 25.35 | 53.4  |
| 2687 | IPI00331258.5 | LQEGYDHSYYFIATFIADHIR          | 854.0828  | 3 | 32 | y8     | 35.8  | 67.8  |
| 2688 | IPI00331258.5 | MALKQISSNRC                    | 436.8780  | 3 | 16 |        | 0     | 16.0  |
| 2689 | IPI00331258.5 | MYSYVTEELPQLINANFPVDPQR        | 909.1169  | 3 | 21 | P y6   | 14.55 | 35.6  |
| 2690 | IPI00331258.5 | MYSYVTEELPQLINANFPVDPQR        | 909.1169  | 3 | 28 | y4     | 20.55 | 48.6  |
| 2691 | IPI00331258.5 | MYSYVTEELPQLINANFPVDPQR        | 909.1166  | 3 | 37 |        | 0     | 37.0  |
| 2692 | IPI00331258.5 | VFEHSSVELK                     | 587.8090  | 2 | 41 | c b8   | 22.4  | 63.4  |
| 2693 | IPI00283862.4 | FVFDRLPVSR                     | 444.9188  | 3 | 17 | P y4   | 41    | 58.0  |
| 2694 | IPI00283862.4 | NQYDNDVTWVSPQGR                | 889.9508  | 2 | 47 | y5     | 35.8  | 82.8  |
| 2695 | IPI00283862.4 | RAQSELAHQK                     | 413.5587  | 3 | 49 | c b5   | 25.35 | 74.4  |
| 2696 | IPI00283862.4 | RAQSELAHQK                     | 456.2565  | 3 | 40 | c b5   | 15.6  | 55.6  |
| 2697 | IPI00283862.4 | THAVLVALK                      | 476.3030  | 2 | 36 | y7     | 77.6  | 113.6 |
| 2698 | IPI00331680.5 | GNSMQEALR                      | 503.2432  | 2 | 47 | y7     | 12.85 | 59.9  |
| 2699 | IPI00331680.5 | HLGFQSAVEALR                   | 664.8650  | 2 | 32 | y7     | 12.85 | 44.9  |
| 2700 | IPI00331680.5 | HLGFQSAVEALR                   | 443.2423  | 3 | 43 | y4     | 27.2  | 70.2  |
| 2701 | IPI00120914.1 | IQDALSTVLQYAEDVLSGK            | 1026.0443 | 2 | 71 | y8     | 77.6  | 148.6 |
| 2702 | IPI00345039.2 | SDKLPYK                        | 446.7428  | 2 | 36 | y4     | 83.9  | 119.9 |
| 2703 | IPI00345039.2 | VAEAHMGK                       | 421.7588  | 2 | 21 | y4     | 1.05  | 22.1  |

|      |               |                     |           |   |    |        |        |       |
|------|---------------|---------------------|-----------|---|----|--------|--------|-------|
| 2704 | IPI00119945.1 | ESSIYLIGGSIPEEDAGK  | 932.9637  | 2 | 70 | P y7   | 102.45 | 172.5 |
| 2705 | IPI00115866.1 | FYEGTADEMYK         | 677.2975  | 2 | 40 | y8     | 44.3   | 84.3  |
| 2706 | IPI00115866.1 | HVEPGNAAIQEK        | 646.8335  | 2 | 54 | P y9   | 81.65  | 135.7 |
| 2707 | IPI00115866.1 | TVQQHAGETDPVTTMR    | 590.9531  | 3 | 37 | y4     | 29.45  | 66.5  |
| 2708 | IPI00110986.1 | ADQLTEEQIAEFK       | 782.8835  | 2 | 16 |        | 0      | 16.0  |
| 2709 | IPI00110986.1 | DGNGYISAAELR        | 633.8056  | 2 | 30 | y7     | 22.4   | 52.4  |
| 2710 | IPI00110986.1 | DGNGYISAAELR        | 633.3101  | 2 | 64 | y6     | 15.6   | 79.6  |
| 2711 | IPI00110986.1 | DTDSEEEIREAFR       | 798.8593  | 2 | 33 | y++8   | 15.6   | 48.6  |
| 2712 | IPI00110986.1 | EAFSLFDK            | 478.7398  | 2 | 34 |        | 0      | 34.0  |
| 2713 | IPI00110986.1 | MKDTDSEEEIREAFR     | 619.2885  | 3 | 18 |        | 0      | 18.0  |
| 2714 | IPI00132194.1 | GAEADQIIEYLK        | 675.3522  | 2 | 69 | c b8   | 12.85  | 81.9  |
| 2715 | IPI00221614.1 | LGLHSLR             | 398.2455  | 2 | 34 | y4     | 44.5   | 78.5  |
| 2716 | IPI00221614.1 | MGNIFGNLL           | 1021.5743 | 1 | 22 | c b4   | 1.25   | 23.3  |
| 2717 | IPI00221614.1 | QDLPNAMNAAEITDK     | 815.9253  | 2 | 69 | y8     | 55.3   | 124.3 |
| 2718 | IPI00403584.1 | GLVGEIHK            | 414.7632  | 2 | 28 | y5     | 83.9   | 111.9 |
| 2719 | IPI00403584.1 | NIIHGSDSVESA EK     | 495.9108  | 3 | 26 | y5     | 69.9   | 95.9  |
| 2720 | IPI00403584.1 | NIIHGSDSVESA EK     | 743.3692  | 2 | 40 | y++12  | 28.95  | 69.0  |
| 2721 | IPI00403584.1 | YMHSGPVVAMVWEGLNVVK | 706.3634  | 3 | 19 | y6     | 52.95  | 72.0  |
| 2722 | IPI00403584.1 | YMHSGPVVAMVWEGLNVVK | 706.3634  | 3 | 19 | y8     | 40.2   | 59.2  |
| 2723 | IPI00321308.2 | IVAVTGAEAQK         | 543.8114  | 2 | 49 | y7     | 77.6   | 126.6 |
| 2724 | IPI00321308.2 | LERLVSVLQNK         | 650.3123  | 2 | 26 | c b4   | 16.9   | 42.9  |
| 2725 | IPI00321308.2 | LVFIQYNR            | 527.2903  | 2 | 22 |        | 0      | 22.0  |
| 2726 | IPI00321308.2 | LVSVLQNK            | 450.7800  | 2 | 28 | y6     | 25.35  | 53.4  |
| 2727 | IPI00321308.2 | MALELLTQEFGIPVER    | 923.9925  | 2 | 18 | P y4   | 41     | 59.0  |
| 2728 | IPI00321308.2 | MALELLTQEFGIPVER    | 923.9928  | 2 | 33 | P y4   | 41     | 74.0  |
| 2729 | IPI00321308.2 | VATVLALR            | 421.7587  | 2 | 32 | y6     | 23.75  | 55.8  |
| 2730 | IPI00321308.2 | VGAEDADGIDMAYR      | 741.8773  | 2 | 57 | y5     | 52.95  | 110.0 |
| 2731 | IPI00119004.1 | DVEEAKPELSLLGDGDY   | 925.4376  | 2 | 43 | c b5   | 27.2   | 70.2  |
| 2732 | IPI00119004.1 | DVEEAKPELSLLGDGDY   | 925.4414  | 2 | 53 |        | 0      | 53.0  |
| 2733 | IPI00129517.1 | ATDLLLLDDSLVSLFGNR  | 925.4901  | 2 | 41 | y5     | 7.1    | 48.1  |
| 2734 | IPI00129517.1 | ATDLLLLDDSLVSLFGNR  | 924.9870  | 2 | 47 | y4     | 15.6   | 62.6  |
| 2735 | IPI00129517.1 | ATDLLLLDDSLVSLFGNRR | 669.0344  | 3 | 25 | b6     | 29.45  | 54.5  |
| 2736 | IPI00129517.1 | ATDLLLLDDSLVSLFGNRR | 669.3632  | 3 | 36 | b6     | 25.35  | 61.4  |
| 2737 | IPI00129517.1 | LLADPTGAFGK         | 545.3006  | 2 | 29 | P y7   | 82.65  | 111.7 |
| 2738 | IPI00129517.1 | RFSMVIDNGIVK        | 460.2551  | 3 | 34 | c b5   | 15.6   | 49.6  |
| 2739 | IPI00129517.1 | THLPGFVEQAGALK      | 734.4061  | 2 | 36 |        | 0      | 36.0  |
| 2740 | IPI00129517.1 | THLPGFVEQAGALK      | 489.9371  | 3 | 43 | y7     | 42.15  | 85.2  |
| 2741 | IPI00129517.1 | VGDAIPSVEVFEGEPGK   | 865.4985  | 2 | 20 | c b5 P | 57.05  | 77.1  |
| 2742 | IPI00129517.1 | VNLAELFK            | 467.2740  | 2 | 47 | y6     | 89     | 136.0 |
| 2743 | IPI00347561.2 | AENGKLVINGKPTTIFQE  | 979.9967  | 2 | 15 | y8     | 5.35   | 20.4  |
| 2744 | IPI00347561.2 | QIIAS               | 532.3841  | 1 | 15 | y4     | 7.7    | 22.7  |

|      |               |                                |           |   |    |         |        |       |
|------|---------------|--------------------------------|-----------|---|----|---------|--------|-------|
| 2745 | IPI00347561.2 | QIIAS                          | 532.3841  | 1 | 16 |         | 0      | 16.0  |
| 2746 | IPI00116498.1 | FLIPNASQPESK                   | 665.8574  | 2 | 42 | P y9    | 85.6   | 127.6 |
| 2747 | IPI00116498.1 | GIVDQSQQAYQEAFEISKK            | 724.0311  | 3 | 18 |         | 0      | 18.0  |
| 2748 | IPI00116498.1 | VVSSIEQK                       | 445.2534  | 2 | 21 | y6      | 52.95  | 74.0  |
| 2749 | IPI00116498.1 | YLAEVAAGDDKK                   | 640.3297  | 2 | 48 | y8      | 73.4   | 121.4 |
| 2750 | IPI00337957.3 | ALLELQLEPEELYQTFQR             | 1111.0814 | 2 | 47 | b7      | 13.65  | 60.7  |
| 2751 | IPI00337957.3 | GEGQLSAAER                     | 509.2520  | 2 | 55 | y5      | 15.6   | 70.6  |
| 2752 | IPI00314439.3 | AIRDGVIEASINHEK                | 551.2977  | 3 | 38 | c b6    | 44.5   | 82.5  |
| 2753 | IPI00314439.3 | FNQVLDQFGEK                    | 662.8290  | 2 | 50 | y6      | 102.45 | 152.5 |
| 2754 | IPI00314439.3 | LQLDSPEDAEFIVAK                | 837.9326  | 2 | 61 | b4      | 49.1   | 110.1 |
| 2755 | IPI00314439.3 | SVFPEQANNNE                    | 625.8087  | 2 | 18 |         | 0      | 18.0  |
| 2756 | IPI00123750.1 | GNFGDNSGLAEYVAQAIDPSLSWDDITWLR | 1156.5624 | 3 | 65 | y++14   | 16.1   | 81.1  |
| 2757 | IPI00123750.1 | ISDYEQHVRSVLQK                 | 851.9451  | 2 | 23 | y8      | 11.55  | 34.6  |
| 2758 | IPI00131459.1 | DRPFFTGLVK                     | 590.3296  | 2 | 21 |         | 0      | 21.0  |
| 2759 | IPI00131459.1 | EISLWFQPEELVEYK                | 955.9833  | 2 | 26 | c b7 P  | 38.2   | 64.2  |
| 2760 | IPI00131459.1 | EISLWFQPEELVEYK                | 955.9836  | 2 | 32 |         | 0      | 32.0  |
| 2761 | IPI00131459.1 | FLQASEDLLK                     | 582.3195  | 2 | 43 | y7      | 77.6   | 120.6 |
| 2762 | IPI00131459.1 | TFIAIKPDGVQR                   | 672.8881  | 2 | 23 | y4      | 49.1   | 72.1  |
| 2763 | IPI00131548.1 | LMAVPNLSMLETVDVSK              | 923.9908  | 2 | 40 |         | 0      | 40.0  |
| 2764 | IPI00131548.1 | TFGENYVQELLEK                  | 785.3944  | 2 | 53 | y6      | 38.2   | 91.2  |
| 2765 | IPI00108189.2 | AQVAQPGGDTIFGK                 | 694.8618  | 2 | 64 | P y9    | 85.6   | 149.6 |
| 2766 | IPI00108189.2 | KHISQISVADDDDESLLGHLMIVGKK     | 570.7044  | 5 | 23 | y++9    | 14.55  | 37.6  |
| 2767 | IPI00228491.1 | FLGPDGSLLLDLLQLAEPPPK          | 788.4340  | 3 | 33 | P y4    | 27.2   | 60.2  |
| 2768 | IPI00228491.1 | TAGAQQMPWLESVPIAVSNNIDESELMR   | 1078.8590 | 3 | 55 | y7      | 33.75  | 88.8  |
| 2769 | IPI00130353.1 | QKTQQQPPHG                     | 575.7303  | 2 | 18 |         | 0      | 18.0  |
| 2770 | IPI00130353.1 | SILYVSPHPDAFPSLR               | 920.9817  | 2 | 63 | y6      | 14.55  | 77.6  |
| 2771 | IPI00378963.1 | KRIEK                          | 337.2035  | 2 | 22 |         | 0      | 22.0  |
| 2772 | IPI00378963.1 | LVRGR                          | 300.6950  | 2 | 16 |         | 0      | 16.0  |
| 2773 | IPI00378963.1 | SVEAAAELSAK                    | 538.2853  | 2 | 62 | y9      | 66.55  | 128.6 |
| 2774 | IPI00131460.1 | EVAGQVGVPLQDLMVR               | 855.9619  | 2 | 44 | P y8    | 95.65  | 139.7 |
| 2775 | IPI00131460.1 | NINENFGPNTIHLVPILATAVQEELEK    | 1045.2132 | 3 | 31 | y7      | 22.4   | 53.4  |
| 2776 | IPI00131460.1 | NINENFGPNTIHLVPILATAVQEELEK    | 1045.2136 | 3 | 39 | P y++13 | 50.5   | 89.5  |
| 2777 | IPI00131460.1 | SMIR                           | 506.2763  | 1 | 18 |         | 0      | 18.0  |
| 2778 | IPI00133551.2 | FHVPLLLSPWSYTTYR               | 660.6846  | 3 | 44 | c b8 P  | 13.65  | 57.7  |
| 2779 | IPI00133551.2 | TSYTNLDGR                      | 513.7459  | 2 | 52 | y7      | 33.75  | 85.8  |
| 2780 | IPI00317309.3 | ADAEVLRK                       | 451.2593  | 2 | 44 |         | 0      | 44.0  |
| 2781 | IPI00317309.3 | FITIFGTR                       | 477.7739  | 2 | 24 | y6      | 13.65  | 37.7  |
| 2782 | IPI00317309.3 | NFATSLYSMIK                    | 637.8578  | 2 | 40 | y7      | 33.75  | 73.8  |
| 2783 | IPI00317309.3 | SELTGKFEK                      | 519.7780  | 2 | 17 | y7      | 46.75  | 63.8  |
| 2784 | IPI00317309.3 | SVSHLR                         | 349.7008  | 2 | 17 | y4      | 41     | 58.0  |
| 2785 | IPI00317309.3 | TPEELSAIK                      | 494.2724  | 2 | 49 | y7      | 90.2   | 139.2 |

|      |               |                           |           |   |    |        |        |       |
|------|---------------|---------------------------|-----------|---|----|--------|--------|-------|
| 2786 | IPI00317309.3 | VLTEIIASR                 | 501.3038  | 2 | 53 | y7     | 46.75  | 99.8  |
| 2787 | gij2497269    | ANTELENKIR                | 595.3350  | 2 | 55 |        | 0      | 55.0  |
| 2788 | gij2497269    | ANTELENKIR                | 595.3350  | 2 | 55 |        | 0      | 55.0  |
| 2789 | IPI00407451.1 | GVLLGIDDLQTNQFK           | 830.9474  | 2 | 61 | y6     | 6.6    | 67.6  |
| 2790 | IPI00330302.2 | ASLQVLGTVGEPINPEAWLWYHR   | 879.7945  | 3 | 37 | b10    | 4.95   | 42.0  |
| 2791 | IPI00330302.2 | ASLQVLGTVGEPINPEAWLWYHR   | 879.7945  | 3 | 39 | b6     | 1.05   | 40.1  |
| 2792 | IPI00330302.2 | IGPIATPDYIQNAPGLPK        | 933.5133  | 2 | 33 | P y5   | 57.05  | 90.1  |
| 2793 | IPI00121517.1 | AMSVEQLTDVLINEILHGADGTSIK | 885.4822  | 3 | 29 | y++15  | 38.5   | 67.5  |
| 2794 | IPI00121517.1 | AMSVEQLTDVLINEILHGADGTSIK | 885.8243  | 3 | 45 | y++17  | 14.9   | 59.9  |
| 2795 | IPI00121517.1 | ILQEAGADISK               | 572.8140  | 2 | 53 | y6     | 69.75  | 122.8 |
| 2796 | IPI00121517.1 | TVMSHLDR                  | 479.7427  | 2 | 21 | y5     | 62.3   | 83.3  |
| 2797 | IPI00277001.3 | ALALAVK                   | 685.4604  | 1 | 39 | b6     | 49.6   | 88.6  |
| 2798 | IPI00277001.3 | VEIATLTR                  | 451.7696  | 2 | 60 | y6     | 27.2   | 87.2  |
| 2799 | IPI00266614.1 | ALTSDFEEQRK               | 718.8840  | 2 | 60 |        | 0      | 60.0  |
| 2800 | IPI00266614.1 | GFAFDIPGFYDSGFLK          | 890.9346  | 2 | 30 | c b6 P | 6.6    | 36.6  |
| 2801 | IPI00133706.1 | EFADSLGVPFLETSK           | 855.9340  | 2 | 47 | P y8   | 73.4   | 120.4 |
| 2802 | IPI00133706.1 | LQIWDTAGQER               | 659.3382  | 2 | 36 | y4     | 15.6   | 51.6  |
| 2803 | IPI00133706.1 | LQIWDTAGQER               | 658.8359  | 2 | 49 | y5     | 29.45  | 78.5  |
| 2804 | IPI00127691.1 | EGGGNNLYGEEMVQALEQLK      | 1090.5259 | 2 | 60 | y7     | 25.35  | 85.4  |
| 2805 | IPI00123449.1 | DVQLSGPGGSVQDGPDLTYFTMLK  | 920.7804  | 3 | 41 | y4     | 32.3   | 73.3  |
| 2806 | IPI00123449.1 | DVQLSGPGGSVQDGPDLTYFTMLK  | 920.7801  | 3 | 41 | y5     | 20.55  | 61.6  |
| 2807 | IPI00123449.1 | MQVLTK                    | 761.4424  | 1 | 36 |        | 0      | 36.0  |
| 2808 | IPI00230042.3 | EGKQNLVIMGR               | 415.8708  | 3 | 25 |        | 0      | 25.0  |
| 2809 | IPI00230042.3 | IMQEFESDTFFPEIDLK         | 1074.0075 | 2 | 37 | P y7   | 102.45 | 139.5 |
| 2810 | IPI00133605.1 | TGVLQGGPESEVEIVK          | 821.4394  | 2 | 59 | y7     | 27.2   | 86.2  |
| 2811 | IPI00226835.1 | SSMPDLPGAMDEPYDTR         | 941.4037  | 2 | 58 | y6     | 38.2   | 96.2  |
| 2812 | IPI00121531.1 | EVGLAIR                   | 757.4689  | 1 | 22 | y6     | 27.2   | 49.2  |
| 2813 | IPI00121531.1 | IAIDAGFR                  | 431.7427  | 2 | 43 | y5     | 57.05  | 100.1 |
| 2814 | IPI00378259.1 | SIYGEEFEDENFILK           | 916.9601  | 2 | 51 | y7     | 82.65  | 133.7 |
| 2815 | IPI00270133.1 | IAIDTGFR                  | 446.7480  | 2 | 32 |        | 0      | 32.0  |
| 2816 | IPI00270133.1 | QLETILNKPLK               | 451.9416  | 3 | 20 |        | 0      | 20.0  |
| 2817 | IPI00270133.1 | SIGVSNFNFR                | 570.7935  | 2 | 31 | y6     | 1.4    | 32.4  |
| 2818 | IPI00270133.1 | TPALIAIR                  | 427.7771  | 2 | 58 | y6     | 25.35  | 83.4  |
| 2819 | IPI00270133.1 | VFEFQLASEDMK              | 722.3735  | 2 | 41 | y6     | 25.35  | 66.4  |
| 2820 | IPI00341351.2 | VMPELN                    | 360.1919  | 2 | 17 | c b4   | 7.1    | 24.1  |
| 2821 | IPI00341351.2 | YDNSLK                    | 739.3638  | 1 | 23 | y4     | 62.3   | 85.3  |
| 2822 | IPI00323911.3 | AILSZYAAK                 | 475.2894  | 2 | 53 | y6     | 65.15  | 118.2 |
| 2823 | IPI00323911.3 | DGHLLFGQVPLVEIDGMMLTQTR   | 857.7761  | 3 | 41 | y4     | 29.45  | 70.5  |
| 2824 | IPI00113996.4 | DSSRLPSEGPQPAHVVDVDR      | 551.5377  | 4 | 15 |        | 0      | 15.0  |
| 2825 | IPI00113996.4 | DSSRLPSEGPQPAHVVDVDR      | 735.0574  | 3 | 32 | b5 P   | 14.55  | 46.6  |
| 2826 | IPI00113996.4 | HDLGHFMLR                 | 375.8590  | 3 | 28 |        | 0      | 28.0  |

|      |               |                                |           |   |    |      |       |       |
|------|---------------|--------------------------------|-----------|---|----|------|-------|-------|
| 2827 | IPI00113996.4 | IAIFGATGR                      | 453.2643  | 2 | 49 | y6   | 21.2  | 70.2  |
| 2828 | IPI00113996.4 | ILQESGLK                       | 444.2636  | 2 | 28 | y5   | 57.05 | 85.1  |
| 2829 | IPI00113996.4 | LQDVTDDHIR                     | 606.3043  | 2 | 47 | y8   | 44.3  | 91.3  |
| 2830 | IPI00128376.1 | NAQLDYVDLYIIHFPMALQPGDK        | 888.1175  | 3 | 26 |      | 0     | 26.0  |
| 2831 | IPI00228824.1 | SSTQIEQLR                      | 531.2702  | 2 | 24 | c b7 | 1.75  | 25.8  |
| 2832 | IPI00348328.2 | IIAEVRAR                       | 927.5681  | 1 | 15 | y4   | 15.6  | 30.6  |
| 2833 | IPI00348328.2 | NDSLQSAIADAEQQGEMAVR           | 1068.0315 | 2 | 19 |      | 0     | 19.0  |
| 2834 | IPI00348328.2 | NDSLQSAIADAEQQGEMAVR           | 1068.0311 | 2 | 32 |      | 0     | 32.0  |
| 2835 | IPI00308391.3 | ASTPAASLLPK                    | 528.3266  | 2 | 55 | c b7 | 13.65 | 68.7  |
| 2836 | IPI00308391.3 | IPKVR                          | 306.6950  | 2 | 18 | P y4 | 15.6  | 33.6  |
| 2837 | IPI00110528.1 | ARREEDGIVLDFPVYPTFPQDFHEVEDLIK | 894.7029  | 4 | 17 | b6   | 16.9  | 33.9  |
| 2838 | IPI00110528.1 | ARREEDGIVLDFPVYPTFPQDFHEVEDLIK | 894.7024  | 4 | 32 | b6   | 1.25  | 33.3  |
| 2839 | IPI00110528.1 | VNTEPLPAIEK                    | 605.8371  | 2 | 23 | P y7 | 49.6  | 72.6  |
| 2840 | IPI00222323.1 | AAFIDNMNQYTR                   | 722.3448  | 2 | 24 | y5   | 15.6  | 39.6  |
| 2841 | IPI00222323.1 | DSTLDAEEIFR                    | 683.8526  | 2 | 51 | y8   | 77.6  | 128.6 |
| 2842 | IPI00222323.1 | WTSSDWTFDPR                    | 699.3100  | 2 | 38 | y6   | 12.85 | 50.9  |
| 2843 | IPI00225670.1 | DLVQDPSLLGGTISAYK              | 888.9726  | 2 | 54 | y8   | 21.2  | 75.2  |
| 2844 | IPI00133428.1 | AVANQTSATFLR                   | 639.8451  | 2 | 54 |      | 0     | 54.0  |
| 2845 | IPI00133428.1 | KYEPPVPTR                      | 543.8007  | 2 | 32 | P y6 | 49.6  | 81.6  |
| 2846 | IPI00124225.1 | ALVHERDEAAYGALR                | 557.6249  | 3 | 26 | y4   | 16.9  | 42.9  |
| 2847 | IPI00124225.1 | LLALLALVKPEVWTLK               | 603.0634  | 3 | 29 | P y7 | 35.8  | 64.8  |
| 2848 | IPI00121348.1 | ALGVNTVGAQTLK                  | 636.3695  | 2 | 57 | y6   | 25.35 | 82.4  |
| 2849 | IPI00121348.1 | LFYEHPIFSEVISDQEAVSALEK        | 884.7835  | 3 | 20 | y5   | 29.45 | 49.5  |
| 2850 | IPI00121348.1 | LFYEHPIFSEVISDQEAVSALEK        | 884.7803  | 3 | 23 | y5   | 41    | 64.0  |
| 2851 | IPI00121348.1 | LGIPATIVPNTTPALTIER            | 1039.1070 | 2 | 29 | y8   | 22.4  | 51.4  |
| 2852 | IPI00121348.1 | NNPGWVYISPFDDPLIWEGHTSLVK      | 962.4830  | 3 | 17 | b6   | 1.6   | 18.6  |
| 2853 | IPI00407129.1 | QGFIDLPEFPFGLLEPR              | 931.4790  | 2 | 54 | P y7 | 61.35 | 115.4 |
| 2854 | IPI00382015.1 | GTTAVLTEK                      | 460.2587  | 2 | 47 | c b6 | 15.6  | 62.6  |
| 2855 | IPI00135443.1 | DKTPALISDYK                    | 625.8371  | 2 | 18 |      | 0     | 18.0  |
| 2856 | IPI00135443.1 | MAKSSLAGSDGA                   | 576.8069  | 2 | 17 |      | 0     | 17.0  |
| 2857 | IPI00136483.1 | DGIVLGADTR                     | 508.7721  | 2 | 53 | y7   | 12.85 | 65.9  |
| 2858 | IPI00119234.2 | PAKYDDIK                       | 475.2536  | 2 | 33 | c b6 | 57.05 | 90.1  |
| 2859 | IPI00119234.2 | VVDLMAYMASEE                   | 453.2244  | 3 | 32 | c b7 | 14.55 | 46.6  |
| 2860 | IPI00345883.2 | VIHDNFGIVEGLMTMVHAITATXK       | 669.8382  | 4 | 21 |      | 0     | 21.0  |
| 2861 | IPI00313201.3 | IGGHGAEYGAEALER                | 510.5832  | 3 | 47 | y4   | 44.5  | 91.5  |
| 2862 | IPI00313201.3 | IGGHGAEYGAEALER                | 765.3789  | 2 | 49 | y7   | 23.75 | 72.8  |
| 2863 | IPI00313201.3 | LRVDPVNFK                      | 363.2133  | 3 | 28 | c b5 | 25.35 | 53.4  |
| 2864 | IPI00313201.3 | TYFPHFDVSHGSAQVK               | 607.6320  | 3 | 22 | y++9 | 1.05  | 23.1  |
| 2865 | IPI00313201.3 | TYFPHFDVSHGSAQVK               | 607.2986  | 3 | 31 | c b7 | 35.8  | 66.8  |
| 2866 | IPI00313201.3 | VADALANAAGHLDDLPGALSALSDDLHAHK | 573.7013  | 5 | 16 |      | 0     | 16.0  |
| 2867 | IPI00137560.1 | HPQRNQGDR                      | 583.2293  | 2 | 18 | y7   | 5.55  | 23.6  |

|      |               |                               |           |   |    |        |       |       |
|------|---------------|-------------------------------|-----------|---|----|--------|-------|-------|
| 2868 | IPI00395139.1 | ENEMRENLQVFEFQLSPEDMK         | 872.0698  | 3 | 24 | P y5   | 75.6  | 99.6  |
| 2869 | IPI00395139.1 | LNDGHLIPALGFGTYKPK            | 648.0346  | 3 | 16 | y6     | 6.2   | 22.2  |
| 2870 | IPI00395139.1 | SIGVSNFNHR                    | 565.7885  | 2 | 51 | y6     | 14.55 | 65.6  |
| 2871 | IPI00377876.1 | GAGTATQPLAPVQ                 | 605.8434  | 2 | 19 | y9     | 4.95  | 24.0  |
| 2872 | IPI00377876.1 | MAGMDLGA                      | 383.2198  | 2 | 52 | y7     | 5.85  | 57.9  |
| 2873 | IPI00119522.1 | QLQGNQLR                      | 479.7595  | 2 | 16 |        | 0     | 16.0  |
| 2874 | IPI00312058.3 | ASQRPDVLTGGGNPIGDK            | 628.3289  | 3 | 19 | y9     | 33.75 | 52.8  |
| 2875 | IPI00312058.3 | EAETFPFNPFDLTK                | 828.9023  | 2 | 18 | c b5 P | 69.75 | 87.8  |
| 2876 | IPI00312058.3 | NAIHTYTQAGSHMAAK              | 567.9453  | 3 | 34 | y++12  | 27.7  | 61.7  |
| 2877 | IPI00312058.3 | NAIHTYTQAGSHMAAK              | 567.6113  | 3 | 43 |        | 0     | 43.0  |
| 2878 | IPI00312058.3 | NPVNYFAEVEQMAFDPSNMPPGIEPSPDK | 1074.8268 | 3 | 29 | y6     | 49.1  | 78.1  |
| 2879 | IPI00312058.3 | RTPIAVR                       | 406.7590  | 2 | 22 | c b5   | 7.1   | 29.1  |
| 2880 | IPI00283327.4 | GYSWRKK                       | 462.7324  | 2 | 16 |        | 0     | 16.0  |
| 2881 | IPI00283327.4 | HMAATLIEAMFK                  | 689.8575  | 2 | 16 |        | 0     | 16.0  |
| 2882 | IPI00283327.4 | VILQAAVR                      | 435.7742  | 2 | 51 |        | 0     | 51.0  |
| 2883 | IPI00135640.1 | TMLELLNQLDGFTEATK             | 912.4684  | 2 | 51 | y7     | 95.65 | 146.7 |
| 2884 | IPI00117264.1 | APLVLKD                       | 378.2371  | 2 | 21 | y4     | 36.1  | 57.1  |
| 2885 | IPI00117264.1 | DGLILTSR                      | 437.7530  | 2 | 26 | y4     | 27.2  | 53.2  |
| 2886 | IPI00117264.1 | GAEEMETVIPVDVMR               | 838.4049  | 2 | 47 | P y6   | 52.95 | 100.0 |
| 2887 | IPI00117264.1 | MMNGSHYSYSESR                 | 516.8783  | 3 | 29 | y++10  | 49.6  | 78.6  |
| 2888 | IPI00117264.1 | TQGPYDVVWLPGGNLGAQNLSESPMVK   | 924.4735  | 3 | 25 | b9     | 21.2  | 46.2  |
| 2889 | IPI00117264.1 | TQGPYDVVWLPGGNLGAQNLSESPMVK   | 924.4776  | 3 | 38 | b9     | 31.95 | 70.0  |
| 2890 | IPI00117264.1 | VTTHPLAK                      | 433.7586  | 2 | 41 |        | 0     | 41.0  |
| 2891 | IPI00331528.4 | QGLLEFVDITATNNTSAIQDYLQQLTGAR | 1061.2129 | 3 | 51 | y4     | 18.5  | 69.5  |
| 2892 | IPI00116134.1 | GAFNFDKETVINPETGEQI           | 352.5410  | 6 | 18 |        | 0     | 18.0  |
| 2893 | IPI00116134.1 | KVVEHLEKAK                    | 590.8137  | 2 | 17 | y8     | 22.4  | 39.4  |
| 2894 | IPI00116134.1 | LASVLNTDPALDSELTSK            | 937.4902  | 2 | 50 | c b8 P | 5.35  | 55.4  |
| 2895 | IPI00116134.1 | VILGSKAAQQR                   | 585.8473  | 2 | 21 | y9     | 11    | 32.0  |
| 2896 | IPI00116134.1 | VLAVAYAAGR                    | 531.3029  | 2 | 19 | y4     | 1.05  | 20.1  |
| 2897 | IPI00154045.1 | ALELEQELR                     | 550.8013  | 2 | 40 | y7     | 49.6  | 89.6  |
| 2898 | IPI00154045.1 | ANIGDAQAMGQRPIFFR             | 665.0128  | 3 | 44 |        | 0     | 44.0  |
| 2899 | IPI00154045.1 | KPFTEVIR                      | 495.2929  | 2 | 22 | P y7   | 61.35 | 83.4  |
| 2900 | IPI00154045.1 | LTEQVFNEAPGIR                 | 737.4058  | 2 | 36 | P y4   | 32.3  | 68.3  |
| 2901 | IPI00109482.1 | AGLGHPSAFGR                   | 556.2853  | 2 | 38 | P y6   | 14.55 | 52.6  |
| 2902 | IPI00109482.1 | ATHAVVR                       | 377.2222  | 2 | 21 | y4     | 15.6  | 36.6  |
| 2903 | IPI00109482.1 | GAEILADTFK                    | 532.7858  | 2 | 50 | y6     | 38.2  | 88.2  |
| 2904 | IPI00346002.2 | ATISNDGATILK                  | 602.3329  | 2 | 49 | y9     | 11    | 60.0  |
| 2905 | IPI00346002.2 | AVTALSSK                      | 388.7004  | 2 | 16 | y5     | 1.25  | 17.3  |
| 2906 | IPI00307991.1 | EPVARSR                       | 407.7428  | 2 | 21 | y5     | 15.6  | 36.6  |
| 2907 | IPI00308885.2 | TLNDELEIIEGMK                 | 752.8814  | 2 | 49 | y5     | 44.5  | 93.5  |
| 2908 | IPI00230139.3 | GDHPTDAEMK                    | 372.8646  | 3 | 20 | y5     | 16.9  | 36.9  |

|      |               |                                      |           |   |    |        |        |       |
|------|---------------|--------------------------------------|-----------|---|----|--------|--------|-------|
| 2909 | IPI00230139.3 | RGEAHLAVNDFDLAR                      | 562.2974  | 3 | 29 | y7     | 25.35  | 54.4  |
| 2910 | IPI00230139.3 | RGEAHLAVNDFDLAR                      | 561.9584  | 3 | 37 |        | 0      | 37.0  |
| 2911 | IPI00129928.2 | KPVHPNDHVNK                          | 429.2331  | 3 | 23 | c b4 P | 8.5    | 31.5  |
| 2912 | IPI00129928.2 | MPIPVIQAFGILK                        | 713.9282  | 2 | 49 | y7     | 15.6   | 64.6  |
| 2913 | IPI00157501.5 | EMIAHKSK                             | 472.3027  | 2 | 25 | y6     | 6.2    | 31.2  |
| 2914 | IPI00157501.5 | LQVTAVKHGDSLK                        | 698.4070  | 2 | 15 | c b8   | 1.95   | 17.0  |
| 2915 | IPI00112555.3 | KSEMESVLAQLDNYGQQLADLFVNYNVK         | 1116.5525 | 3 | 48 | y7     | 49.6   | 97.6  |
| 2916 | IPI00310658.3 | ENEMRENLQVFGFQLSPEDMK                | 848.0628  | 3 | 24 | P y5   | 44.5   | 68.5  |
| 2917 | IPI00310658.3 | GIVPLAQSFK                           | 530.3141  | 2 | 20 | P y7   | 111.85 | 131.9 |
| 2918 | IPI00310658.3 | KLQLDYVDLYIMHYPVPMK                  | 789.7468  | 3 | 23 | c b8   | 22.4   | 45.4  |
| 2919 | IPI00310658.3 | KLQLDYVDLYIMHYPVPMK                  | 789.7495  | 3 | 26 | y++11  | 44.3   | 70.3  |
| 2920 | IPI00153294.2 | ILATGGASHNK                          | 534.7936  | 2 | 47 | y9     | 52.75  | 99.8  |
| 2921 | IPI00117910.1 | EGGLGPLNIPLLDVTK                     | 853.9867  | 2 | 34 |        | 0      | 34.0  |
| 2922 | IPI00117910.1 | NDLPVGR                              | 770.4878  | 1 | 20 |        | 0      | 20.0  |
| 2923 | IPI00117910.1 | QITVNDLPVGR                          | 606.3402  | 2 | 41 |        | 0      | 41.0  |
| 2924 | IPI00330504.1 | REDIFYTSK                            | 579.7935  | 2 | 48 | c b5   | 27.2   | 75.2  |
| 2925 | IPI00137930.1 | SAIQNLHSFDPFADASKGDDLLPAGTEDYIHIR    | 914.9471  | 4 | 30 |        | 0      | 30.0  |
| 2926 | IPI00137930.1 | SAIQNLHSFDPFADASKGDDLLPAGTEDYIHIR    | 914.9470  | 4 | 39 | y6     | 16.9   | 55.9  |
| 2927 | IPI00115871.1 | LAHAVHER                             | 311.5071  | 3 | 23 |        | 0      | 23.0  |
| 2928 | IPI00115871.1 | LAHAVHER                             | 466.7573  | 2 | 46 | y5     | 41     | 87.0  |
| 2929 | IPI00112955.1 | ASGVAVSDGVIK                         | 572.8140  | 2 | 20 |        | 0      | 20.0  |
| 2930 | IPI00230044.1 | IQLVEEELDRAQER                       | 864.4831  | 2 | 27 | y4     | 6.6    | 33.6  |
| 2931 | IPI00230044.1 | IQVLQQADDAEERAER                     | 667.0010  | 3 | 36 |        | 0      | 36.0  |
| 2932 | IPI00230044.1 | LMDQNLK                              | 431.2284  | 2 | 16 | y5     | 69.75  | 85.8  |
| 2933 | IPI00230044.1 | MLDQTLDDLNEM                         | 718.3487  | 2 | 39 | y5     | 25.35  | 64.4  |
| 2934 | IPI00379752.1 | LVQAFQFTDK                           | 598.8193  | 2 | 45 | y8     | 25.35  | 70.4  |
| 2935 | IPI00122657.1 | ENFQIFDFSLTEEEMKDIDALNK              | 926.7734  | 3 | 15 |        | 0      | 15.0  |
| 2936 | IPI00122657.1 | ENFQIFDFSLTEEEMKDIDALNK              | 926.4398  | 3 | 16 |        | 0      | 16.0  |
| 2937 | IPI00122657.1 | LWNTEHVPSMVLPALER                    | 664.6837  | 3 | 29 | P y5   | 75.6   | 104.6 |
| 2938 | IPI00122657.1 | MNLSAAHHQISLSDGNNIPLIGLGTYS DPRPVPGK | 928.9791  | 4 | 32 | P y7   | 23.75  | 55.8  |
| 2939 | IPI00122657.1 | MNLSAAHHQISLSDGNNIPLIGLGTYS DPRPVPGK | 929.2300  | 4 | 35 |        | 0      | 35.0  |
| 2940 | IPI00122657.1 | QLELILNKPLK                          | 683.4336  | 2 | 33 | y7     | 33.75  | 66.8  |
| 2941 | IPI00122657.1 | TQAQIVLR                             | 464.7822  | 2 | 42 | y6     | 38.2   | 80.2  |
| 2942 | IPI00124692.1 | IHLDEK                               | 377.7084  | 2 | 24 | y4     | 41     | 65.0  |
| 2943 | IPI00124692.1 | LIELYK                               | 389.7392  | 2 | 26 | y5     | 57.05  | 83.1  |
| 2944 | IPI00124692.1 | LSDGIRK                              | 394.7350  | 2 | 30 | y4     | 15.6   | 45.6  |
| 2945 | IPI00124692.1 | MESALDQLK                            | 517.7632  | 2 | 47 | y5     | 38.2   | 85.2  |
| 2946 | IPI00124692.1 | SYEPQEDPGVK                          | 624.7907  | 2 | 34 | P y8   | 90.2   | 124.2 |
| 2947 | IPI00124692.1 | VSTEVDAR                             | 438.7245  | 2 | 46 |        | 0      | 46.0  |
| 2948 | IPI00124692.1 | WLHNEDQMAVEK                         | 500.5698  | 3 | 35 | y5     | 62.3   | 97.3  |
| 2949 | IPI00339916.1 | AIQGATSHHLGQNFSK                     | 565.9572  | 3 | 19 | y++11  | 12.15  | 31.2  |



|      |               |                                  |           |   |    |         |       |       |
|------|---------------|----------------------------------|-----------|---|----|---------|-------|-------|
| 2950 | IPI00339916.1 | EVVPVNVLDAQEEMK                  | 850.4311  | 2 | 44 | y8      | 33.75 | 77.8  |
| 2951 | IPI00339916.1 | LDAQEEMK                         | 490.7382  | 2 | 18 |         | 0     | 18.0  |
| 2952 | IPI00121736.1 | DRSGVISDNELQQALSNGTWTPFNPVTVR    | 1068.2092 | 3 | 43 | P y5    | 49.6  | 92.6  |
| 2953 | IPI00408350.1 | RILGLLDTHLK                      | 426.9350  | 3 | 43 | c b5    | 29.45 | 72.5  |
| 2954 | IPI00113845.1 | AGGSASAMLQPLLDNQVGFK             | 1002.5148 | 2 | 42 | c b10 P | 19.15 | 61.2  |
| 2955 | IPI00318841.1 | NKQATENAKEEVK                    | 744.9230  | 2 | 16 |         | 0     | 16.0  |
| 2956 | IPI00318841.1 | YSNEDTLSVALPYFWEHFDK             | 821.3830  | 3 | 34 |         | 0     | 34.0  |
| 2957 | IPI00352984.2 | EVEIDCLTGDHK                     | 708.3916  | 2 | 31 | c b4    | 18.5  | 49.5  |
| 2958 | IPI00352984.2 | KLHPVQER                         | 336.1980  | 3 | 17 |         | 0     | 17.0  |
| 2959 | IPI00112783.1 | EGVGSIKK                         | 409.2299  | 2 | 34 | c b7    | 22.4  | 56.4  |
| 2960 | IPI00120095.2 | LTDNIFLEVLHSTDPQLSEAQSILR        | 947.5038  | 3 | 41 | y6      | 6.6   | 47.6  |
| 2961 | IPI00330303.4 | DVSELTFPEMLGGR                   | 804.3901  | 2 | 41 | P y7    | 52.95 | 94.0  |
| 2962 | IPI00120165.1 | EEGLPVPELFDPLFSR                 | 987.4962  | 2 | 41 | P y5    | 65.15 | 106.2 |
| 2963 | IPI00128491.1 | LGPIPFLLQYD                      | 755.9052  | 2 | 40 | y6      | 52.95 | 93.0  |
| 2964 | IPI00331704.5 | FAPNILENSEALELVK                 | 894.5077  | 2 | 15 |         | 0     | 15.0  |
| 2965 | IPI00331704.5 | FAPNILENSEALELVK                 | 894.4690  | 2 | 16 |         | 0     | 16.0  |
| 2966 | IPI00109823.2 | AGLLFIFNFHPSK                    | 497.9461  | 3 | 18 |         | 0     | 18.0  |
| 2967 | IPI00109823.2 | ENNNVNYDWIHWAPEDPYK              | 802.3608  | 3 | 16 | P y6    | 52.95 | 69.0  |
| 2968 | IPI00109823.2 | EWAPGAEGVFLTGEFSGWNPFSHPYK       | 971.1239  | 3 | 15 |         | 0     | 15.0  |
| 2969 | IPI00109823.2 | GNIVYTLNRR                       | 436.8979  | 3 | 16 | b5      | 6.6   | 22.6  |
| 2970 | IPI00109823.2 | GYESFGIHR                        | 533.2593  | 2 | 40 | y6      | 15.6  | 55.6  |
| 2971 | IPI00109823.2 | HFTSNVLP                         | 535.7916  | 2 | 31 | y7      | 61.35 | 92.4  |
| 2972 | IPI00109823.2 | IVLSDAAEYGGHQR                   | 544.2651  | 3 | 23 | y++14   | 35.45 | 58.5  |
| 2973 | IPI00331262.1 | ENISQDIDHILETSLAVALDLGGTNLR      | 969.8444  | 3 | 17 |         | 0     | 17.0  |
| 2974 | IPI00331262.1 | ENISQDIDHILETSLAVALDLGGTNLR      | 970.1760  | 3 | 39 | y5      | 16.9  | 55.9  |
| 2975 | IPI00134334.2 | VDPQLVDGHLASYFLGAIGMPGLTSLIGVQEK | 1085.9133 | 3 | 21 | y5      | 16.9  | 37.9  |
| 2976 | IPI00134334.2 | VDPQLVDGHLASYFLGAIGMPGLTSLIGVQEK | 1085.9128 | 3 | 39 |         | 0     | 39.0  |
| 2977 | IPI00131228.1 | YDYVFPENGLVAYK                   | 839.4112  | 2 | 39 | P y9    | 78.1  | 117.1 |
| 2978 | gij547754     | GGGFGGGGFGSR                     | 506.7460  | 2 | 32 | c b10   | 4.8   | 36.8  |
| 2979 | gij547754     | IEISELNR                         | 487.2689  | 2 | 42 | y6      | 27.2  | 69.2  |
| 2980 | gij547754     | QSGSRGGSGGGGSI                   | 582.3091  | 2 | 17 | y7      | 1.75  | 18.8  |
| 2981 | IPI00346617.2 | DLQQGTL                          | 388.7004  | 2 | 24 |         | 0     | 24.0  |
| 2982 | IPI00116281.1 | DLFMVEIMEMK                      | 693.3117  | 2 | 16 |         | 0     | 16.0  |
| 2983 | IPI00116281.1 | DRETLIDVAR                       | 396.5510  | 3 | 21 | y4      | 27.2  | 48.2  |
| 2984 | IPI00116281.1 | GIDPFSLDALAK                     | 623.8385  | 2 | 37 | P y9    | 66.55 | 103.6 |
| 2985 | IPI00116281.1 | IIGELLK                          | 393.2603  | 2 | 26 | y6      | 52.95 | 79.0  |
| 2986 | IPI00128945.1 | MRNGYELSPTAAANFTR                | 633.6454  | 3 | 36 | c b8 P  | 12.15 | 48.2  |
| 2987 | IPI00128945.1 | RFILNLPTFSVR                     | 488.2893  | 3 | 33 | b5      | 29.45 | 62.5  |
| 2988 | IPI00128945.1 | VAASNIVQMKDDHDK                  | 557.6100  | 3 | 18 | y++12   | 28.95 | 47.0  |
| 2989 | IPI00132951.2 | ETLLEMFK                         | 505.7648  | 2 | 45 |         | 0     | 45.0  |
| 2990 | IPI00132951.2 | GAYIYNTLMEFIR                    | 796.4922  | 2 | 35 | y4      | 29.45 | 64.5  |

|      |               |                                   |           |   |    |        |       |       |
|------|---------------|-----------------------------------|-----------|---|----|--------|-------|-------|
| 2991 | IPI00132951.2 | KRPVIVHR                          | 335.5542  | 3 | 18 |        | 0     | 18.0  |
| 2992 | IPI00132951.2 | MDGEKPVDASEEK                     | 478.8856  | 3 | 24 |        | 0     | 24.0  |
| 2993 | IPI00132951.2 | QLENSLNEFGKEKWELNPGDGAFYGPK       | 980.8005  | 3 | 17 | y9     | 22.4  | 39.4  |
| 2994 | IPI00132951.2 | QLENSLNEFGKEKWELNPGDGAFYGPK       | 980.8013  | 3 | 32 | y7     | 49.6  | 81.6  |
| 2995 | IPI00314948.3 | HPHIK                             | 316.1877  | 2 | 22 | P y4   | 29.45 | 51.5  |
| 2996 | IPI00314948.3 | RGQVVGTR                          | 436.7567  | 2 | 27 | c b5   | 11.15 | 38.2  |
| 2997 | IPI00314948.3 | VLSMAPGLTSVEIIPFR                 | 915.5145  | 2 | 35 | y4     | 16.9  | 51.9  |
| 2998 | IPI00127596.1 | DLFDPIIQDR                        | 616.3197  | 2 | 40 | P y6   | 14.55 | 54.6  |
| 2999 | IPI00127596.1 | SMTEQEQQLLIDHFLFDKPVSPLLLASGMAR   | 912.4586  | 4 | 22 | y5     | 16.9  | 38.9  |
| 3000 | IPI00125971.1 | ALQSVGQIVGEVLK                    | 720.9251  | 2 | 25 | y9     | 81.65 | 106.7 |
| 3001 | IPI00125971.1 | TLMELLNQMDGFDLHR                  | 678.9979  | 3 | 35 | b5     | 8.5   | 43.5  |
| 3002 | IPI00400117.1 | ISVLQCHGDCDPLVPLMFGSLTVER         | 948.4579  | 3 | 33 | y4     | 27.2  | 60.2  |
| 3003 | IPI00153740.1 | FHMVDGNVTGEFTDLVPEK               | 712.3721  | 3 | 33 | y4     | 44.5  | 77.5  |
| 3004 | IPI00283511.1 | MRKPDGSTVTQR                      | 459.2422  | 3 | 33 | y4     | 15.6  | 48.6  |
| 3005 | IPI00124793.1 | LQEAYYIFQELADK                    | 866.4345  | 2 | 32 | y7     | 35.8  | 67.8  |
| 3006 | IPI00119520.1 | DLNRAEEFAQK                       | 660.8324  | 2 | 32 | c b7   | 13.65 | 45.7  |
| 3007 | IPI00119520.1 | PMGVNAAEVR                        | 522.2185  | 2 | 32 | y8     | 21.2  | 53.2  |
| 3008 | IPI00310091.1 | IGPILDNSTLQSEVKPILEK              | 732.4160  | 3 | 31 | y++14  | 9.65  | 40.7  |
| 3009 | IPI00379563.1 | LNWLSVDFNWK                       | 768.3862  | 2 | 31 | y6     | 52.95 | 84.0  |
| 3010 | IPI00124742.1 | ELPTEPPYTAYVGNLFPNTVQGDIDAIFK     | 1070.8737 | 3 | 30 | b5 P   | 8.5   | 38.5  |
| 3011 | IPI00229834.2 | HVLEGHDR                          | 321.4983  | 3 | 30 | c b4   | 32.3  | 62.3  |
| 3012 | IPI00229834.2 | LPIYVTR                           | 431.2494  | 2 | 17 | P y6   | 38.2  | 55.2  |
| 3013 | IPI00116221.1 | ANIIYPGHGPVIHNAEAK                | 634.6779  | 3 | 17 | c b5 P | 7.7   | 24.7  |
| 3014 | IPI00116221.1 | ENGDVVK                           | 381.2555  | 2 | 33 |        | 0     | 33.0  |
| 3015 | IPI00116221.1 | IFYTTTPVK                         | 535.3002  | 2 | 29 | y7     | 44.3  | 73.3  |
| 3016 | IPI00116221.1 | SFTVTELR                          | 476.7583  | 2 | 30 | y4     | 15.6  | 45.6  |
| 3017 | IPI00136213.3 | FHHSLTDHTR                        | 417.5392  | 3 | 30 | y5     | 27.2  | 57.2  |
| 3018 | IPI00112093.2 | RREDGDPDAAAAPLQDAELALAGINMLLNNGFR | 874.7176  | 4 | 28 | y6     | 6.6   | 34.6  |
| 3019 | IPI00112093.2 | RREDGDPDAAAAPLQDAELALAGINMLLNNGFR | 874.9679  | 4 | 30 | y5     | 7.1   | 37.1  |
| 3020 | IPI00112093.2 | TGDVDGAQLVFK                      | 625.7944  | 2 | 34 |        | 0     | 34.0  |
| 3021 | IPI00331650.1 | KGEHLSDAFAR                       | 410.8791  | 3 | 30 | y6     | 25.35 | 55.4  |
| 3022 | IPI00132080.1 | AAPAPSLISVFSSPQELGASLAQLVAQR      | 951.5191  | 3 | 16 |        | 0     | 16.0  |
| 3023 | IPI00132080.1 | AAPAPSLISVFSSPQELGASLAQLVAQR      | 951.5191  | 3 | 28 |        | 0     | 28.0  |
| 3024 | IPI00126680.1 | VLGPLIGVQPQEK                     | 738.9675  | 2 | 28 | y8     | 55.3  | 83.3  |
| 3025 | IPI00121962.1 | TNNFNVETLK                        | 590.3042  | 2 | 40 | y8     | 31.95 | 72.0  |
| 3026 | IPI00121962.1 | TTADEWGENYFLIGPYFEHNMK            | 888.4034  | 3 | 24 |        | 0     | 24.0  |
| 3027 | IPI00121962.1 | TTADEWGENYFLIGPYFEHNMK            | 888.4030  | 3 | 28 | b6     | 6.6   | 34.6  |
| 3028 | IPI00121962.1 | YYQHAR                            | 419.2040  | 2 | 26 | y4     | 27.2  | 53.2  |
| 3029 | IPI00121271.1 | MVDMPANNK                         | 510.2361  | 2 | 30 | y7     | 77.6  | 107.6 |
| 3030 | IPI00121271.1 | VLEVASGSGQHAHFAQAFPNAEWQPSDQDR    | 863.4119  | 4 | 20 |        | 0     | 20.0  |
| 3031 | IPI00121271.1 | VLEVASGSGQHAHFAQAFPNAEWQPSDQDR    | 863.4116  | 4 | 28 | P y7   | 35.8  | 63.8  |

|      |               |                                |           |   |    |       |        |       |
|------|---------------|--------------------------------|-----------|---|----|-------|--------|-------|
| 3032 | IPI00320400.5 | DAFERNPELQNLDDFFK              | 775.7244  | 3 | 24 | y7    | 46.75  | 70.8  |
| 3033 | IPI00320400.5 | DAFERNPELQNLDDFFK              | 775.7351  | 3 | 26 | y7    | 61.35  | 87.4  |
| 3034 | IPI00320400.5 | VVQLEGSKK                      | 494.2960  | 2 | 32 | y7    | 49.6   | 81.6  |
| 3035 | IPI00378404.1 | QQWQQLYDTLNAWK                 | 911.9530  | 2 | 24 | y++13 | 36.9   | 60.9  |
| 3036 | IPI00378404.1 | VVSHSTHR                       | 341.1897  | 3 | 29 |       | 0      | 29.0  |
| 3037 | IPI00379594.1 | MMADLPLIDFEGK                  | 756.3735  | 2 | 27 |       | 0      | 27.0  |
| 3038 | IPI00316314.1 | TQDVEYMFVGGIPVTEIALAAQELGIK    | 998.1990  | 3 | 27 | y8    | 11.55  | 38.6  |
| 3039 | IPI00108895.1 | CGKTMLAK                       | 454.7644  | 2 | 24 | c b7  | 5.85   | 29.9  |
| 3040 | IPI00108895.1 | ENAPAIIFIDEIDAIATK             | 973.0452  | 2 | 27 | y5    | 5.85   | 32.9  |
| 3041 | IPI00108895.1 | RFDAQTGADREVQR                 | 550.2764  | 3 | 20 | y++11 | 21.2   | 41.2  |
| 3042 | IPI00124639.1 | SWSDNWRGIIESK                  | 789.4328  | 2 | 17 | y8    | 2.3    | 19.3  |
| 3043 | IPI00124639.1 | VASVYESPGFFLNLEPIGALDALREMNDMK | 1142.5745 | 3 | 26 | y++17 | 5.35   | 31.4  |
| 3044 | IPI00229281.1 | AMVQLQSQISSMEK                 | 798.9596  | 2 | 26 |       | 0      | 26.0  |
| 3045 | IPI00403557.1 | LEPIWTRNPDDITQEEYGEFYK         | 915.4541  | 3 | 25 | y6    | 29.45  | 54.5  |
| 3046 | IPI00131478.1 | LHPDPGTWESFLENFMDGK            | 741.0100  | 3 | 22 |       | 0      | 22.0  |
| 3047 | IPI00131478.1 | LHPDPGTWESFLENFMDGK            | 741.0101  | 3 | 24 | y7    | 23.75  | 47.8  |
| 3048 | IPI00131478.1 | VSYGSWYQHVK                    | 677.3452  | 2 | 23 |       | 0      | 23.0  |
| 3049 | IPI00223800.3 | DINLASFIEQVAVSMT               | 869.4384  | 2 | 24 |       | 0      | 24.0  |
| 3050 | IPI00116603.1 | GLTLSWGDNILHSIMMSAAK           | 810.4412  | 3 | 21 | y++16 | 52.95  | 74.0  |
| 3051 | IPI00116753.3 | TIVAINKDPEAPIFQVADYGVADLFK     | 983.5313  | 3 | 21 | y4    | 55.9   | 76.9  |
| 3052 | IPI00113214.1 | AGDRVHK                        | 782.4532  | 1 | 27 |       | 0      | 27.0  |
| 3053 | IPI00113214.1 | IVILPDYLEIAR                   | 707.9201  | 2 | 20 | P y8  | 108.75 | 128.8 |
| 3054 | IPI00113214.1 | QQDAQEFFLHLINMVER              | 707.0201  | 3 | 19 | y5    | 29.45  | 48.5  |
| 3055 | IPI00109232.3 | AEPANAGKYTCQIKN                | 556.6321  | 3 | 15 |       | 0      | 15.0  |
| 3056 | IPI00109232.3 | ETNGLSGSSV                     | 476.2052  | 2 | 19 |       | 0      | 19.0  |
| 3057 | IPI00109232.3 | ETNGLSGSSV                     | 476.2052  | 2 | 24 |       | 0      | 24.0  |
| 3058 | IPI00109232.3 | ETNGLSGSSV                     | 476.2052  | 2 | 29 |       | 0      | 29.0  |
| 3059 | IPI00109232.3 | FVKKLSDAS                      | 332.1763  | 3 | 17 |       | 0      | 17.0  |
| 3060 | IPI00109232.3 | IFVKR                          | 331.7030  | 2 | 34 | y4    | 27.2   | 61.2  |
| 3061 | IPI00230690.1 | ADTESVKLQVEQNK                 | 794.9109  | 2 | 16 | c b7  | 5.55   | 21.6  |
| 3062 | IPI00230690.1 | EFNSGGSEQ                      | 478.7579  | 2 | 22 |       | 0      | 22.0  |
| 3063 | IPI00230690.1 | ILNQR                          | 322.7083  | 2 | 33 |       | 0      | 33.0  |
| 3064 | IPI00230690.1 | KTVNLVLK                       | 457.7875  | 2 | 16 |       | 0      | 16.0  |
| 3065 | IPI00230690.1 | LTVDEAVQ                       | 437.7749  | 2 | 20 | y6    | 33.75  | 53.8  |
| 3066 | IPI00230690.1 | NQEAFIGDGTVELQK                | 583.9490  | 3 | 15 |       | 0      | 15.0  |
| 3067 | IPI00230690.1 | QQAPKIK                        | 406.7531  | 2 | 20 | y6    | 38.2   | 58.2  |
| 3068 | IPI00230690.1 | QQMSSKEISTKKEQ                 | 835.3623  | 2 | 19 |       | 0      | 19.0  |
| 3069 | IPI00230690.1 | SGSDISQLEK                     | 532.7669  | 2 | 20 |       | 0      | 20.0  |
| 3070 | IPI00230690.1 | SQQVDEK                        | 417.7286  | 2 | 34 |       | 0      | 34.0  |
| 3071 | IPI00230690.1 | SYHVELMRELEQK                  | 831.9514  | 2 | 16 | c b5  | 1.4    | 17.4  |
| 3072 | IPI00319167.2 | EMSLTTEQKLAstriic              | 998.9844  | 2 | 16 |       | 0      | 16.0  |

|      |               |                     |           |   |    |      |       |       |
|------|---------------|---------------------|-----------|---|----|------|-------|-------|
| 3073 | IPI00319167.2 | FEATLDGLPSNIAR      | 752.3803  | 2 | 20 |      | 0     | 20.0  |
| 3074 | IPI00319167.2 | ITNTSHFPV           | 508.2986  | 2 | 35 | y7   | 6.2   | 41.2  |
| 3075 | IPI00319167.2 | IVILR               | 307.2235  | 2 | 28 | y4   | 7.1   | 35.1  |
| 3076 | IPI00319167.2 | KPGATK              | 301.2052  | 2 | 22 | c b5 | 6.6   | 28.6  |
| 3077 | IPI00319167.2 | LIMEK               | 317.1914  | 2 | 26 |      | 0     | 26.0  |
| 3078 | IPI00319167.2 | LKDSDNLAQK          | 630.8071  | 2 | 29 |      | 0     | 29.0  |
| 3079 | IPI00229612.1 | AREGLDK             | 394.7294  | 2 | 30 | y5   | 75.6  | 105.6 |
| 3080 | IPI00229612.1 | DQTTAQLQVQK         | 630.8246  | 2 | 20 | y++8 | 1.25  | 21.3  |
| 3081 | IPI00229612.1 | ELDGMGAIGR          | 509.7712  | 2 | 18 |      | 0     | 18.0  |
| 3082 | IPI00229612.1 | GAKANRADPKK         | 578.8198  | 2 | 18 |      | 0     | 18.0  |
| 3083 | IPI00229612.1 | KQTQALR             | 423.7251  | 2 | 34 |      | 0     | 34.0  |
| 3084 | IPI00229612.1 | LEEEKVVVEEKQ        | 809.8722  | 2 | 15 |      | 0     | 15.0  |
| 3085 | IPI00137718.1 | DYNIQK              | 781.4090  | 1 | 26 |      | 0     | 26.0  |
| 3086 | IPI00137718.1 | ESTLHLVLR           | 534.3142  | 2 | 28 |      | 0     | 28.0  |
| 3087 | IPI00137718.1 | LIFAGK              | 648.4086  | 1 | 19 |      | 0     | 19.0  |
| 3088 | IPI00137718.1 | LIFAGK              | 324.7079  | 2 | 23 | y5   | 52.95 | 76.0  |
| 3089 | IPI00137718.1 | MQIFVK              | 765.4387  | 1 | 34 | y4   | 32.3  | 66.3  |
| 3090 | IPI00137718.1 | TLSDYNIQK           | 541.7817  | 2 | 26 | y7   | 77.6  | 103.6 |
| 3091 | IPI00137718.1 | TLSDYNIQK           | 541.2805  | 2 | 29 | y7   | 61.35 | 90.4  |
| 3092 | IPI00352763.2 | KDLPEAEIVSLAIK      | 763.4774  | 2 | 20 |      | 0     | 20.0  |
| 3093 | IPI00352763.2 | KIIDTVYSK           | 533.8061  | 2 | 20 | y6   | 25.35 | 45.4  |
| 3094 | IPI00352763.2 | NAFTSVHPTH          | 556.2850  | 2 | 17 | y6   | 1.4   | 18.4  |
| 3095 | IPI00352763.2 | QQTEQKK             | 889.5384  | 1 | 16 | y5   | 6.2   | 22.2  |
| 3096 | IPI00352763.2 | SDVDVLK             | 775.4214  | 1 | 31 | c b5 | 7.1   | 38.1  |
| 3097 | IPI00330130.1 | DEPQYPLLLPK         | 656.8646  | 2 | 22 | b4   | 16.9  | 38.9  |
| 3098 | IPI00330130.1 | QKRPLVQK            | 499.8132  | 2 | 17 |      | 0     | 17.0  |
| 3099 | IPI00339751.2 | AGDRVL              | 315.6917  | 2 | 20 | c b4 | 20.55 | 40.6  |
| 3100 | IPI00339751.2 | EMRERMSEVTKLLE      | 632.3950  | 3 | 18 |      | 0     | 18.0  |
| 3101 | IPI00339751.2 | FEKEIELLQAQK        | 739.3943  | 2 | 18 |      | 0     | 18.0  |
| 3102 | IPI00137414.1 | DVRDIVDQAVK         | 629.7702  | 2 | 16 |      | 0     | 16.0  |
| 3103 | IPI00137414.1 | ELLAVR              | 350.7215  | 2 | 23 |      | 0     | 23.0  |
| 3104 | IPI00137414.1 | KFIRIGDK            | 488.7536  | 2 | 19 | c b7 | 5.85  | 24.9  |
| 3105 | IPI00117014.1 | EQMLQQVGKQRVELEQE   | 1038.0103 | 2 | 18 |      | 0     | 18.0  |
| 3106 | IPI00117014.1 | MLELR               | 339.2027  | 2 | 25 |      | 0     | 25.0  |
| 3107 | IPI00319488.2 | DVIEEVTQA           | 502.8138  | 2 | 19 |      | 0     | 19.0  |
| 3108 | IPI00319488.2 | IMSLNKHMEIHK        | 744.9001  | 2 | 16 |      | 0     | 16.0  |
| 3109 | IPI00319488.2 | MAESTEWQEKHKELQKEYE | 814.0430  | 3 | 16 |      | 0     | 16.0  |
| 3110 | IPI00319488.2 | NLEGIHK             | 786.4913  | 1 | 26 |      | 0     | 26.0  |
| 3111 | IPI00319488.2 | VEIKTLK             | 415.7587  | 2 | 28 | c b6 | 16.9  | 44.9  |
| 3112 | IPI00400209.1 | DIQLIR              | 379.2321  | 2 | 35 | y4   | 41    | 76.0  |
| 3113 | IPI00400209.1 | EEQQRQQQMEQEKK      | 998.9846  | 2 | 20 |      | 0     | 20.0  |

|      |               |                     |           |   |    |        |       |      |
|------|---------------|---------------------|-----------|---|----|--------|-------|------|
| 3114 | IPI00400209.1 | EQMAQQ              | 752.5239  | 1 | 20 |        | 0     | 20.0 |
| 3115 | IPI00400209.1 | IYEAMRR             | 469.7514  | 2 | 15 | y5     | 1.25  | 16.3 |
| 3116 | IPI00353420.2 | GAMDDLADDMK         | 394.5660  | 3 | 21 | y5     | 18.5  | 39.5 |
| 3117 | IPI00353420.2 | NFEKVSQHIKSAR       | 772.3738  | 2 | 19 | y8     | 31.95 | 51.0 |
| 3118 | IPI00353420.2 | QQTDPNPKSMDEQ       | 720.8752  | 2 | 18 |        | 0     | 18.0 |
| 3119 | IPI00119876.1 | AQSIYGGRVDNEFDQR    | 928.4671  | 2 | 17 |        | 0     | 17.0 |
| 3120 | IPI00119876.1 | KINMLVIELK          | 401.2192  | 3 | 18 |        | 0     | 18.0 |
| 3121 | IPI00119876.1 | RVLLK               | 628.4412  | 1 | 23 |        | 0     | 23.0 |
| 3122 | IPI00119876.1 | VLQLYQ              | 763.4737  | 1 | 20 |        | 0     | 20.0 |
| 3123 | IPI00169916.4 | AFMTADLPNELIELLEK   | 974.5126  | 2 | 15 | c b7 P | 1.4   | 16.4 |
| 3124 | IPI00169916.4 | AMLSANIRQNLQ        | 680.8461  | 2 | 25 |        | 0     | 25.0 |
| 3125 | IPI00169916.4 | IFNIEMK             | 447.7583  | 2 | 31 | y6     | 35.8  | 66.8 |
| 3126 | IPI00169916.4 | LVAEVEK             | 394.2578  | 2 | 23 |        | 0     | 23.0 |
| 3127 | IPI00350772.2 | KLILDIQNK           | 362.5525  | 3 | 16 |        | 0     | 16.0 |
| 3128 | IPI00350772.2 | KSLPDYLER           | 560.7909  | 2 | 17 | P y6   | 1.25  | 18.3 |
| 3129 | IPI00350772.2 | RVIGNMGR            | 460.2771  | 2 | 17 |        | 0     | 17.0 |
| 3130 | IPI00350772.2 | TENSLNQPSG          | 523.8033  | 2 | 26 | c b5   | 14.55 | 40.6 |
| 3131 | IPI00357831.3 | TITLQVEPSDTIENVK    | 894.9693  | 2 | 17 |        | 0     | 17.0 |
| 3132 | IPI00380805.1 | AVTPRFPK            | 458.2667  | 2 | 20 |        | 0     | 20.0 |
| 3133 | IPI00380805.1 | DFGLTWK             | 866.4030  | 1 | 20 |        | 0     | 20.0 |
| 3134 | IPI00380805.1 | IKVR                | 515.3303  | 1 | 21 |        | 0     | 21.0 |
| 3135 | IPI00380805.1 | VLVCTAT             | 382.2267  | 2 | 16 | y5     | 1.4   | 17.4 |
| 3136 | IPI00377897.1 | GNHLEDVRNK          | 592.3203  | 2 | 16 |        | 0     | 16.0 |
| 3137 | IPI00377897.1 | NQQTILGSPASGIQNTI   | 872.9179  | 2 | 18 |        | 0     | 18.0 |
| 3138 | IPI00377897.1 | QQQMK               | 404.2219  | 2 | 18 |        | 0     | 18.0 |
| 3139 | IPI00343270.2 | ILNGQNKALXLE        | 665.8903  | 2 | 28 |        | 0     | 28.0 |
| 3140 | IPI00343270.2 | IQELQNX             | 422.2379  | 2 | 28 |        | 0     | 28.0 |
| 3141 | IPI00407973.1 | YNKILR              | 403.7297  | 2 | 21 |        | 0     | 21.0 |
| 3142 | IPI00172328.1 | DPPLARNMPPIAGKILWVR | 1073.0376 | 2 | 18 | y4     | 16.9  | 34.9 |
| 3143 | IPI00172328.1 | EIMNQISRNEK         | 454.9298  | 3 | 19 | c b4   | 1.05  | 20.1 |
| 3144 | IPI00172328.1 | FEVKVTK             | 850.4877  | 1 | 15 |        | 0     | 15.0 |
| 3145 | IPI00172328.1 | HINTVLK             | 412.7348  | 2 | 15 | y5     | 6.2   | 21.2 |
| 3146 | IPI00172328.1 | IKTNDIATVRK         | 630.3328  | 2 | 16 |        | 0     | 16.0 |
| 3147 | IPI00172328.1 | KLIQLSMQGGG         | 611.3095  | 2 | 16 |        | 0     | 16.0 |
| 3148 | IPI00172328.1 | LLNDADMCR           | 1108.5365 | 1 | 16 |        | 0     | 16.0 |
| 3149 | IPI00126214.1 | ELADHQB             | 421.2380  | 2 | 23 |        | 0     | 23.0 |
| 3150 | IPI00403995.1 | CHLDAS              | 702.4757  | 1 | 16 |        | 0     | 16.0 |
| 3151 | IPI00403995.1 | LLLLAAMLSASLPG      | 462.5716  | 3 | 17 | c b4   | 1.05  | 18.1 |
| 3152 | IPI00403995.1 | NVISLTENV           | 494.7749  | 2 | 34 | y6     | 15.6  | 49.6 |
| 3153 | IPI00338604.1 | KAKNLAK             | 386.7558  | 2 | 40 | c b6   | 15.6  | 55.6 |
| 3154 | IPI00338604.1 | KLDAQVQELHAK        | 690.8796  | 2 | 23 | y6     | 12.85 | 35.9 |

|      |               |                                 |           |   |    |       |       |      |
|------|---------------|---------------------------------|-----------|---|----|-------|-------|------|
| 3155 | IPI00338604.1 | KQQQLSALK                       | 349.1967  | 3 | 16 |       | 0     | 16.0 |
| 3156 | IPI00338604.1 | QLSALK                          | 659.4078  | 1 | 31 | c b4  | 16.9  | 47.9 |
| 3157 | IPI00343214.2 | ITVAQR                          | 344.2237  | 2 | 27 | y5    | 15.6  | 42.6 |
| 3158 | IPI00378509.1 | ATAEKIK                         | 760.4213  | 1 | 16 |       | 0     | 16.0 |
| 3159 | IPI00378509.1 | VQTVPIQDIEPVDAPHPQVLKSLNKTYQNLK | 1172.2583 | 3 | 17 | b5    | 1.4   | 18.4 |
| 3160 | IPI00396787.1 | EEVEEQLTGVVXKLQ                 | 879.9645  | 2 | 26 |       | 0     | 26.0 |
| 3161 | IPI00396787.1 | ENSGVYTSQNSPELQ                 | 892.9935  | 2 | 23 |       | 0     | 23.0 |
| 3162 | IPI00396787.1 | INGGELDHNHDLEMIR                | 932.9224  | 2 | 22 |       | 0     | 22.0 |
| 3163 | IPI00338309.3 | AAMVFLDRV                       | 575.8248  | 2 | 22 | b5    | 7.1   | 29.1 |
| 3164 | IPI00338309.3 | DIIRSNHL                        | 541.2771  | 2 | 21 |       | 0     | 21.0 |
| 3165 | IPI00338309.3 | GPMVAATLKLGIALNGGNSTVQQK        | 828.0954  | 3 | 18 | c b10 | 4.8   | 22.8 |
| 3166 | IPI00338309.3 | VKSFEK                          | 433.7314  | 2 | 21 |       | 0     | 21.0 |
| 3167 | IPI00229917.1 | AQEDAQREAQR                     | 651.8300  | 2 | 20 |       | 0     | 20.0 |
| 3168 | IPI00229917.1 | NGRLGR                          | 336.6883  | 2 | 17 |       | 0     | 17.0 |
| 3169 | IPI00273443.2 | MREMSSLSEGEVQNR                 | 928.4503  | 2 | 15 |       | 0     | 15.0 |
| 3170 | IPI00273443.2 | SALAGVAVIVLLIPLNGAVSMKMKTYQVK   | 1016.1855 | 3 | 15 |       | 0     | 15.0 |
| 3171 | IPI00352675.2 | EGLPILEKRVK                     | 689.8924  | 2 | 22 | c b8  | 1.95  | 24.0 |
| 3172 | IPI00352675.2 | GRLKEPLQK                       | 534.8125  | 2 | 18 | y5    | 1.25  | 19.3 |
| 3173 | IPI00352675.2 | KVEALARK                        | 457.7687  | 2 | 34 | y6    | 38.2  | 72.2 |
| 3174 | IPI00352675.2 | LSVREMLK                        | 488.3036  | 2 | 24 | c b7  | 23.75 | 47.8 |
| 3175 | IPI00135511.1 | EILEKAGQ                        | 887.4956  | 1 | 31 | y5    | 38.2  | 69.2 |
| 3176 | IPI00135511.1 | ESEKTVQLALDK                    | 681.3688  | 2 | 28 |       | 0     | 28.0 |
| 3177 | IPI00135511.1 | ESEKTVQLALDK                    | 681.3742  | 2 | 29 |       | 0     | 29.0 |
| 3178 | IPI00135511.1 | LVDKEQQR                        | 508.7731  | 2 | 18 |       | 0     | 18.0 |
| 3179 | IPI00135511.1 | SQLSRGEKQRIAIAR                 | 429.1909  | 4 | 23 |       | 0     | 23.0 |
| 3180 | IPI00135511.1 | VQGALNKIQH                      | 554.7985  | 2 | 17 | c b5  | 1.4   | 18.4 |
| 3181 | IPI00378514.1 | DHQEVNTML                       | 543.7593  | 2 | 20 |       | 0     | 20.0 |
| 3182 | IPI00378514.1 | LNNSIMVLSDEIR                   | 752.4115  | 2 | 16 | c b8  | 12.15 | 28.2 |
| 3183 | IPI00406756.1 | KSFAASQVTEGG                    | 591.3126  | 2 | 19 | y9    | 5.15  | 24.2 |
| 3184 | IPI00406756.1 | VAEHIHK                         | 417.2353  | 2 | 32 | c b6  | 38.2  | 70.2 |
| 3185 | IPI00128278.1 | AKEEMDK                         | 866.4071  | 1 | 28 | c b4  | 7.7   | 35.7 |
| 3186 | IPI00128278.1 | DPVTMIDAIPTLINAIK               | 912.9975  | 2 | 16 | c b6  | 1.6   | 17.6 |
| 3187 | IPI00128278.1 | EVQDALIK                        | 915.5152  | 1 | 24 | y6    | 22.4  | 46.4 |
| 3188 | IPI00128278.1 | QALSTLK                         | 380.6955  | 2 | 16 |       | 0     | 16.0 |
| 3189 | IPI00128278.1 | QCMSQLGLPVSPFAALFQKR            | 789.1074  | 3 | 17 | y6    | 25.35 | 42.4 |
| 3190 | IPI00323230.3 | DNKNYGADEEAAGALLK               | 889.9806  | 2 | 16 |       | 0     | 16.0 |
| 3191 | IPI00323230.3 | ETGTLESQLEANK                   | 711.3529  | 2 | 18 |       | 0     | 18.0 |
| 3192 | IPI00323230.3 | LNEAHK                          | 356.1842  | 2 | 24 | y4    | 16.9  | 40.9 |
| 3193 | IPI00315536.2 | AAGEFLYKK                       | 342.8337  | 3 | 16 |       | 0     | 16.0 |
| 3194 | IPI00315536.2 | ELQENQDEIE                      | 624.8165  | 2 | 38 |       | 0     | 38.0 |
| 3195 | IPI00315536.2 | LSGEEALTD                       | 545.7966  | 2 | 26 |       | 0     | 26.0 |

|      |               |                             |           |   |    |      |       |      |
|------|---------------|-----------------------------|-----------|---|----|------|-------|------|
| 3196 | IPI00331176.1 | LEQQDNDK                    | 496.7687  | 2 | 23 |      | 0     | 23.0 |
| 3197 | IPI00331176.1 | QQMDVSEIK                   | 359.8697  | 3 | 22 |      | 0     | 22.0 |
| 3198 | IPI00331176.1 | VESETKNGNEAEVTDQSTSIR       | 766.0648  | 3 | 16 |      | 0     | 16.0 |
| 3199 | IPI00135182.2 | AQALASDHD                   | 464.7519  | 2 | 25 | y6   | 1.4   | 26.4 |
| 3200 | IPI00135182.2 | GSFPAMITPX                  | 546.7707  | 2 | 25 |      | 0     | 25.0 |
| 3201 | IPI00135182.2 | MRGVGWLTEGSLNLEQAKK         | 1068.0315 | 2 | 23 |      | 0     | 23.0 |
| 3202 | IPI00135182.2 | RMVEAR                      | 389.1876  | 2 | 20 | c b5 | 6.2   | 26.2 |
| 3203 | IPI00223699.4 | AAATFTQ                     | 355.2215  | 2 | 16 | c b6 | 6.2   | 22.2 |
| 3204 | IPI00223699.4 | ATNLITK                     | 761.4422  | 1 | 26 |      | 0     | 26.0 |
| 3205 | IPI00223699.4 | ITNKGLVLDENSVEK             | 830.9003  | 2 | 16 |      | 0     | 16.0 |
| 3206 | IPI00223699.4 | LAKEGVK                     | 372.7348  | 2 | 22 | y5   | 41    | 63.0 |
| 3207 | IPI00340443.1 | DKEVIQLREQDRK               | 829.4853  | 2 | 16 |      | 0     | 16.0 |
| 3208 | IPI00340443.1 | SQMAEKK                     | 419.2086  | 2 | 17 | y5   | 14.55 | 31.6 |
| 3209 | IPI00113302.1 | FFTGEK                      | 728.3887  | 1 | 15 |      | 0     | 15.0 |
| 3210 | IPI00355519.2 | FATSMVSSDK                  | 544.7537  | 2 | 24 |      | 0     | 24.0 |
| 3211 | IPI00355519.2 | IKMSFSVFDEEPR               | 528.9428  | 3 | 16 |      | 0     | 16.0 |
| 3212 | IPI00355519.2 | SSTAHMAISSLR                | 459.9089  | 3 | 18 | c b5 | 8.5   | 26.5 |
| 3213 | IPI00330833.3 | ISADSR                      | 648.3727  | 1 | 29 | y4   | 0.9   | 29.9 |
| 3214 | IPI00330833.3 | ISDTRLQK                    | 480.7771  | 2 | 34 | c b6 | 27.2  | 61.2 |
| 3215 | IPI00330833.3 | NANLVK GK                   | 843.4511  | 1 | 18 | b7   | 1.6   | 19.6 |
| 3216 | IPI00330833.3 | QMMHK                       | 674.5027  | 1 | 27 | b4   | 0.9   | 27.9 |
| 3217 | IPI00403414.1 | ETDAEEATR                   | 511.2747  | 2 | 31 | y4   | 27.2  | 58.2 |
| 3218 | IPI00403414.1 | GSQKGGR                     | 345.6697  | 2 | 30 |      | 0     | 30.0 |
| 3219 | IPI00403414.1 | KMPRLK                      | 386.7450  | 2 | 25 |      | 0     | 25.0 |
| 3220 | IPI00350504.3 | INVVLNITATDR                | 664.8299  | 2 | 17 |      | 0     | 17.0 |
| 3221 | IPI00350504.3 | KTNLPNNK                    | 465.7722  | 2 | 25 |      | 0     | 25.0 |
| 3222 | IPI00350504.3 | NKPPKVTMK                   | 521.7646  | 2 | 18 | c b7 | 1.6   | 19.6 |
| 3223 | IPI00350504.3 | NNKAINK                     | 401.2271  | 2 | 21 |      | 0     | 21.0 |
| 3224 | IPI00228668.1 | TAVVSSQPK                   | 459.2690  | 2 | 19 |      | 0     | 19.0 |
| 3225 | IPI00229904.2 | KISSKLKETF SQGLVK           | 896.9729  | 2 | 21 | c b4 | 16.9  | 37.9 |
| 3226 | IPI00229904.2 | LAVSGGLRP                   | 435.2640  | 2 | 46 | y7   | 35.8  | 81.8 |
| 3227 | IPI00229904.2 | VLEKAFK                     | 417.7232  | 2 | 25 | y5   | 6.6   | 31.6 |
| 3228 | IPI00229465.1 | EAQEANAAILADH               | 676.8755  | 2 | 19 | y9   | 2.3   | 21.3 |
| 3229 | IPI00229465.1 | LEQKSGEL                    | 452.7350  | 2 | 19 |      | 0     | 19.0 |
| 3230 | IPI00229465.1 | QHQEVIAYRTHLLSAAQ           | 693.7104  | 3 | 17 | y5   | 14.55 | 31.6 |
| 3231 | IPI00125222.2 | AYVAAALGVSNAAVEDLITAATTGILR | 877.7936  | 3 | 19 |      | 0     | 19.0 |
| 3232 | IPI00125222.2 | LLHVHQK GK                  | 594.3108  | 2 | 21 | y8   | 44.3  | 65.3 |
| 3233 | IPI00125222.2 | LTEK LK                     | 366.2189  | 2 | 27 | y4   | 41    | 68.0 |
| 3234 | IPI00125222.2 | RLIQSSR                     | 430.7692  | 2 | 26 |      | 0     | 26.0 |
| 3235 | IPI00230500.1 | EGEGEPK                     | 745.4083  | 1 | 16 |      | 0     | 16.0 |
| 3236 | IPI00230500.1 | ITALLIAGN                   | 443.7593  | 2 | 16 |      | 0     | 16.0 |

|      |               |                                    |           |   |    |      |       |       |
|------|---------------|------------------------------------|-----------|---|----|------|-------|-------|
| 3237 | IPI00230500.1 | NDLIAKVD                           | 444.2529  | 2 | 16 | y6   | 22.4  | 38.4  |
| 3238 | IPI00230500.1 | VLKGELEAAKQAK                      | 462.2348  | 3 | 16 |      | 0     | 16.0  |
| 3239 | IPI00120997.1 | FANESVPDHVGYAK                     | 512.2676  | 3 | 16 |      | 0     | 16.0  |
| 3240 | IPI00120997.1 | IREGPIK                            | 812.4277  | 1 | 27 |      | 0     | 27.0  |
| 3241 | IPI00120997.1 | MVQKASSCHSSI                       | 668.3144  | 2 | 17 |      | 0     | 17.0  |
| 3242 | IPI00129366.5 | EQGGDCLLLLKSLPAAEA EKTAERVI        | 938.1129  | 3 | 17 |      | 0     | 17.0  |
| 3243 | IPI00129366.5 | IIDLIDREQ                          | 372.5607  | 3 | 17 |      | 0     | 17.0  |
| 3244 | IPI00129366.5 | IIDLIDREQ                          | 372.5607  | 3 | 19 |      | 0     | 19.0  |
| 3245 | IPI00129366.5 | IIDLIDREQ                          | 558.3376  | 2 | 35 |      | 0     | 35.0  |
| 3246 | IPI00129366.5 | ISALLR                             | 336.7239  | 2 | 30 | y4   | 15.6  | 45.6  |
| 3247 | IPI00129366.5 | KNLKP K                            | 364.7188  | 2 | 25 | y4   | 1.05  | 26.1  |
| 3248 | IPI00229987.1 | AVQIHQ                             | 348.2135  | 2 | 25 | y4   | 36.1  | 61.1  |
| 3249 | IPI00229987.1 | IGAQPLFIVPR                        | 606.3596  | 2 | 31 |      | 0     | 31.0  |
| 3250 | IPI00169493.1 | DLLVAVPGRSPMAVLAG                  | 841.4229  | 2 | 21 | y6   | 5.85  | 26.9  |
| 3251 | IPI00169493.1 | ELKIKEGMENM                        | 452.2533  | 3 | 20 |      | 0     | 20.0  |
| 3252 | IPI00169493.1 | ERKLLAAAQQ                         | 564.8123  | 2 | 17 |      | 0     | 17.0  |
| 3253 | IPI00169493.1 | I IYR                              | 564.3510  | 1 | 18 |      | 0     | 18.0  |
| 3254 | IPI00169493.1 | SEALHR                             | 356.6906  | 2 | 26 | y4   | 16.9  | 42.9  |
| 3255 | IPI00123871.1 | AKAPMGPLTMGLPLAVDPK                | 641.6933  | 3 | 15 |      | 0     | 15.0  |
| 3256 | IPI00123871.1 | KEELSKEK                           | 495.7645  | 2 | 36 | c b6 | 13.65 | 49.7  |
| 3257 | IPI00123871.1 | TMVEQQISK                          | 540.7825  | 2 | 22 | c b6 | 1.25  | 23.3  |
| 3258 | IPI00229705.1 | IVAMQ                              | 561.3434  | 1 | 22 | b4   | 29.45 | 51.5  |
| 3259 | IPI00229705.1 | LGYSNITIFEK                        | 643.3539  | 2 | 22 |      | 0     | 22.0  |
| 3260 | IPI00229705.1 | VAELMGQK                           | 446.2526  | 2 | 21 | y6   | 25.35 | 46.4  |
| 3261 | IPI00120490.1 | KMMIDVIK                           | 489.2521  | 2 | 38 |      | 0     | 38.0  |
| 3262 | IPI00120490.1 | LKTVR                              | 308.7054  | 2 | 17 |      | 0     | 17.0  |
| 3263 | IPI00378378.1 | AISGDGQAEGYIAANSEPETR              | 534.7969  | 4 | 17 | P y4 | 1.05  | 18.1  |
| 3264 | IPI00378378.1 | AISGDGQAEGYIAANSEPETR              | 534.7968  | 4 | 21 | y6   | 6.6   | 27.6  |
| 3265 | IPI00378378.1 | KNGDPDK                            | 387.2295  | 2 | 25 | c b6 | 12.85 | 37.9  |
| 3266 | IPI00380873.1 | IGFGVFLK                           | 440.7206  | 2 | 23 | y6   | 14.55 | 37.6  |
| 3267 | IPI00380873.1 | KQDLLKTKMR                         | 426.2207  | 3 | 27 |      | 0     | 27.0  |
| 3268 | IPI00229912.1 | GSLCMSAG                           | 399.7453  | 2 | 25 | y6   | 6.2   | 31.2  |
| 3269 | IPI00229912.1 | IFRSNNLHLK                         | 621.3193  | 2 | 24 | c b8 | 12.15 | 36.2  |
| 3270 | IPI00229912.1 | KIKPE                              | 307.6972  | 2 | 22 | y4   | 15.6  | 37.6  |
| 3271 | IPI00381708.1 | ASLPIANQRRK                        | 692.3839  | 2 | 18 |      | 0     | 18.0  |
| 3272 | IPI00381708.1 | IKASLPIANQK                        | 591.8640  | 2 | 20 | P y6 | 25.35 | 45.4  |
| 3273 | IPI00113262.1 | AVAVVVDPIQSVK                      | 662.9028  | 2 | 35 | y7   | 49.6  | 84.6  |
| 3274 | IPI00113262.1 | HNESVVK                            | 406.7170  | 2 | 33 | y6   | 69.75 | 102.8 |
| 3275 | IPI00113262.1 | LGGGMPGLGQGPPTDAPAVDTAEQVYISSLALLK | 1109.2447 | 3 | 17 |      | 0     | 17.0  |
| 3276 | IPI00344281.2 | GDRQVPSR                           | 458.2667  | 2 | 16 |      | 0     | 16.0  |
| 3277 | IPI00264718.1 | ALSGMAR                            | 353.1928  | 2 | 18 |      | 0     | 18.0  |



|      |               |                   |          |   |    |       |       |      |
|------|---------------|-------------------|----------|---|----|-------|-------|------|
| 3278 | IPI00264718.1 | DQALLLLK          | 914.5715 | 1 | 40 |       | 0     | 40.0 |
| 3279 | IPI00264718.1 | RALSGMAR          | 439.2542 | 2 | 20 | y7    | 22.4  | 42.4 |
| 3280 | IPI00316682.2 | GAATALRK          | 394.2239 | 2 | 19 |       | 0     | 19.0 |
| 3281 | IPI00316682.2 | LRHEKEMQKEEIQK    | 921.4440 | 2 | 17 | y7    | 5.55  | 22.6 |
| 3282 | IPI00316682.2 | SLNQEMASLLQRSK    | 811.9721 | 2 | 16 |       | 0     | 16.0 |
| 3283 | IPI00340215.2 | DKKHHEASDEDLILK   | 885.4063 | 2 | 18 |       | 0     | 18.0 |
| 3284 | IPI00340215.2 | DKKHHEASDEDLILK   | 885.4065 | 2 | 18 |       | 0     | 18.0 |
| 3285 | IPI00340215.2 | DKKHHEASDEDLILK   | 885.4066 | 2 | 23 |       | 0     | 23.0 |
| 3286 | IPI00340215.2 | FLDQLT            | 368.6976 | 2 | 32 | y5    | 1.4   | 33.4 |
| 3287 | IPI00135444.1 | EDNLI             | 302.1985 | 2 | 24 |       | 0     | 24.0 |
| 3288 | IPI00135444.1 | FQLQMRAR          | 525.7703 | 2 | 25 | y6    | 1.4   | 26.4 |
| 3289 | IPI00135444.1 | ITLQNTSD          | 446.7610 | 2 | 15 |       | 0     | 15.0 |
| 3290 | IPI00135444.1 | ITLQNTSD          | 446.7610 | 2 | 17 |       | 0     | 17.0 |
| 3291 | IPI00135444.1 | TGRYQRCDPK        | 427.5777 | 3 | 16 |       | 0     | 16.0 |
| 3292 | IPI00407572.1 | APTPVCPSTSLR      | 643.3015 | 2 | 15 | y7    | 5.55  | 20.6 |
| 3293 | IPI00407572.1 | ASAIQEVPPPK       | 568.7731 | 2 | 28 | y7    | 22.4  | 50.4 |
| 3294 | IPI00407572.1 | TSVLVQQ           | 776.5161 | 1 | 18 |       | 0     | 18.0 |
| 3295 | IPI00221657.1 | CGTGIAIISETKIK    | 802.3998 | 2 | 25 | c b10 | 4.7   | 29.7 |
| 3296 | IPI00221657.1 | CGTGIAIISETKIK    | 802.3997 | 2 | 31 |       | 0     | 31.0 |
| 3297 | IPI00221657.1 | ILNDR             | 316.1925 | 2 | 30 |       | 0     | 30.0 |
| 3298 | IPI00221657.1 | QLNINGA           | 365.2392 | 2 | 29 |       | 0     | 29.0 |
| 3299 | IPI00221657.1 | TIQER             | 380.2219 | 2 | 21 | y4    | 7.1   | 28.1 |
| 3300 | IPI00130597.3 | EFFELTSEEK        | 629.8278 | 2 | 22 | y7    | 22.4  | 44.4 |
| 3301 | IPI00130597.3 | GKGILNGQKST       | 551.8087 | 2 | 20 |       | 0     | 20.0 |
| 3302 | IPI00124546.2 | ARNLLEKETAVTKILR  | 619.0796 | 3 | 18 |       | 0     | 18.0 |
| 3303 | IPI00320831.1 | MQQDVIMVLK        | 611.3406 | 2 | 31 |       | 0     | 31.0 |
| 3304 | IPI00111158.1 | LADAAEN           | 352.2032 | 2 | 21 | y5    | 6.6   | 27.6 |
| 3305 | IPI00111158.1 | RKVQALKR          | 500.2889 | 2 | 41 |       | 0     | 41.0 |
| 3306 | IPI00404837.1 | IVQEAR            | 358.7132 | 2 | 19 |       | 0     | 19.0 |
| 3307 | IPI00404837.1 | RNIEAVKG          | 443.7715 | 2 | 41 | y7    | 13.65 | 54.7 |
| 3308 | IPI00404837.1 | TQAELEASQK        | 368.8771 | 3 | 16 | y5    | 0.35  | 16.4 |
| 3309 | IPI00349020.2 | EVAKQALSRLR       | 636.3546 | 2 | 18 | y4    | 16.9  | 34.9 |
| 3310 | IPI00349020.2 | RSLDSR            | 367.2014 | 2 | 21 |       | 0     | 21.0 |
| 3311 | IPI00127330.1 | DEQMTVNPPEK       | 652.8046 | 2 | 29 |       | 0     | 29.0 |
| 3312 | IPI00127330.1 | NLAEELESVAGRCQQVR | 491.0115 | 4 | 16 |       | 0     | 16.0 |
| 3313 | IPI00127330.1 | SIEENLGTVK        | 545.7694 | 2 | 27 | y6    | 5.55  | 32.6 |
| 3314 | IPI00127330.1 | TLLEAENS          | 517.2619 | 2 | 28 |       | 0     | 28.0 |
| 3315 | IPI00224151.3 | NLLNEKNHGV        | 626.3356 | 2 | 16 |       | 0     | 16.0 |
| 3316 | IPI00276393.2 | DKQIEELTRMLQQK    | 593.3514 | 3 | 23 | b5    | 1.4   | 24.4 |
| 3317 | IPI00276393.2 | DMKVAELK          | 317.1714 | 3 | 24 |       | 0     | 24.0 |
| 3318 | IPI00276393.2 | FKEPPSLPGKEK      | 678.8439 | 2 | 19 | y++11 | 5.35  | 24.4 |

|      |               |               |          |   |    |      |       |       |
|------|---------------|---------------|----------|---|----|------|-------|-------|
| 3319 | IPI00276393.2 | MLQQKQQLVELL  | 736.9054 | 2 | 18 |      | 0     | 18.0  |
| 3320 | IPI00119886.1 | GGDDFK        | 319.6609 | 2 | 21 |      | 0     | 21.0  |
| 3321 | IPI00356257.2 | ILKFMDKGD     | 541.7798 | 2 | 23 | y6   | 7.1   | 30.1  |
| 3322 | IPI00356257.2 | INMKVR        | 760.4175 | 1 | 20 |      | 0     | 20.0  |
| 3323 | IPI00356257.2 | LTNVKLEK      | 473.2480 | 2 | 16 |      | 0     | 16.0  |
| 3324 | IPI00115607.1 | EAFSGQILANFK  | 442.5652 | 3 | 25 | b7   | 1.6   | 26.6  |
| 3325 | IPI00115607.1 | LKPAFIKP      | 305.1708 | 3 | 16 |      | 0     | 16.0  |
| 3326 | IPI00115607.1 | SHSLAKKAQDE   | 405.5477 | 3 | 20 | b4   | 1.05  | 21.1  |
| 3327 | IPI00408623.1 | IIEVQK        | 365.2289 | 2 | 23 | y5   | 69.75 | 92.8  |
| 3328 | IPI00408623.1 | IIEVQK        | 729.4510 | 1 | 44 | y4   | 29.45 | 73.5  |
| 3329 | IPI00350704.1 | GARCSK        | 339.7186 | 2 | 15 | y4   | 7.1   | 22.1  |
| 3330 | IPI00350704.1 | LQPACEQARSVSR | 751.9071 | 2 | 20 |      | 0     | 20.0  |
| 3331 | IPI00350704.1 | QAFMVSVR      | 469.2504 | 2 | 17 |      | 0     | 17.0  |
| 3332 | IPI00353672.1 | FEATNQTVQ     | 520.2947 | 2 | 20 |      | 0     | 20.0  |
| 3333 | IPI00353672.1 | FEATNQTVQ     | 520.2946 | 2 | 29 |      | 0     | 29.0  |
| 3334 | IPI00353672.1 | FETQPLDMISDK  | 720.9188 | 2 | 16 |      | 0     | 16.0  |
| 3335 | IPI00353672.1 | QASQFHQYV     | 554.8039 | 2 | 16 | y7   | 5.55  | 21.6  |
| 3336 | IPI00267295.2 | MITSAAGIISL   | 546.7657 | 2 | 32 | c b8 | 44.3  | 76.3  |
| 3337 | IPI00267295.2 | RLDVFEK       | 453.7557 | 2 | 32 | b5   | 38.2  | 70.2  |
| 3338 | IPI00126245.1 | FYKMPLS       | 901.4455 | 1 | 19 | y5   | 25.35 | 44.4  |
| 3339 | IPI00126245.1 | GVLAAALQLR    | 506.3064 | 2 | 19 | c b9 | 11    | 30.0  |
| 3340 | IPI00229428.1 | DPEANECWK     | 574.7762 | 2 | 15 | y7   | 12.85 | 27.9  |
| 3341 | IPI00229428.1 | LVGDGYRGK     | 482.7340 | 2 | 28 | c b7 | 5.55  | 33.6  |
| 3342 | IPI00378277.1 | GGPSSRSBK     | 456.7527 | 2 | 17 | y4   | 8.5   | 25.5  |
| 3343 | IPI00378277.1 | MRFTNQVISR    | 635.3607 | 2 | 30 |      | 0     | 30.0  |
| 3344 | IPI00265190.1 | DQERTLSLNNVK  | 709.8715 | 2 | 22 |      | 0     | 22.0  |
| 3345 | IPI00340120.2 | AIDLFTDAIK    | 553.8082 | 2 | 42 | y6   | 83.9  | 125.9 |
| 3346 | IPI00340120.2 | LAILYAK       | 396.2550 | 2 | 18 | y4   | 44.5  | 62.5  |
| 3347 | IPI00132317.1 | ELGGSPAGGK    | 436.7636 | 2 | 36 |      | 0     | 36.0  |
| 3348 | IPI00345502.2 | AINVQGIENR    | 558.7858 | 2 | 28 |      | 0     | 28.0  |
| 3349 | IPI00345502.2 | IATNNIK       | 775.4424 | 1 | 16 |      | 0     | 16.0  |
| 3350 | IPI00403860.1 | GVAKETYK      | 448.2097 | 2 | 20 |      | 0     | 20.0  |
| 3351 | IPI00322464.3 | DTQDALAVVIE   | 587.2987 | 2 | 20 | c b4 | 16.9  | 36.9  |
| 3352 | IPI00322464.3 | ERMLTWTEQQR   | 493.8996 | 3 | 25 |      | 0     | 25.0  |
| 3353 | IPI00346595.2 | AKLEKIQK      | 479.2721 | 2 | 19 | y4   | 18.5  | 37.5  |
| 3354 | IPI00346595.2 | EQA AVR       | 673.3776 | 1 | 35 |      | 0     | 35.0  |
| 3355 | IPI00230481.1 | HIKRLR        | 411.7328 | 2 | 32 | y4   | 29.45 | 61.5  |
| 3356 | IPI00230481.1 | PDIIK         | 698.3964 | 1 | 17 |      | 0     | 17.0  |
| 3357 | IPI00336672.3 | DGFARTIQK     | 518.7881 | 2 | 22 | b6   | 14.55 | 36.6  |
| 3358 | IPI00336672.3 | GRLHGQE       | 398.7248 | 2 | 18 | y5   | 14.55 | 32.6  |
| 3359 | IPI00336672.3 | ILLNKK        | 365.2289 | 2 | 27 |      | 0     | 27.0  |

|      |               |                       |           |   |    |       |       |       |
|------|---------------|-----------------------|-----------|---|----|-------|-------|-------|
| 3360 | IPI00336672.3 | QFSRGGEPDGGK          | 618.3395  | 2 | 22 | y10   | 11    | 33.0  |
| 3361 | IPI00344728.2 | CHFENQRSILSSR         | 545.2862  | 3 | 35 | y5    | 25.35 | 60.4  |
| 3362 | IPI00344728.2 | EAQPTARARS            | 544.3096  | 2 | 25 | y6    | 1.4   | 26.4  |
| 3363 | IPI00344728.2 | KLAAKDR               | 401.2507  | 2 | 27 |       | 0     | 27.0  |
| 3364 | IPI00117846.1 | KPENIMLLDK            | 601.3254  | 2 | 28 |       | 0     | 28.0  |
| 3365 | IPI00314905.3 | DSSENSEAITKER         | 733.3601  | 2 | 16 | c b5  | 52.95 | 69.0  |
| 3366 | IPI00314905.3 | DSSENSEAITKER         | 733.3602  | 2 | 18 |       | 0     | 18.0  |
| 3367 | IPI00314905.3 | EFLNSR                | 766.3739  | 1 | 28 |       | 0     | 28.0  |
| 3368 | IPI00314905.3 | HLETHSSPAK            | 610.3326  | 2 | 19 | y7    | 5.85  | 24.9  |
| 3369 | IPI00380896.1 | EAESGGGGGK            | 424.7404  | 2 | 37 | c b9  | 5.15  | 42.2  |
| 3370 | IPI00380896.1 | QLEEEIKAK             | 1087.5962 | 1 | 18 | y4    | 44.5  | 62.5  |
| 3371 | IPI00379877.1 | AEDSIENISTTIK         | 710.8621  | 2 | 22 | y4    | 15.6  | 37.6  |
| 3372 | IPI00379877.1 | HIIKTTNALN            | 619.3306  | 2 | 17 | y8    | 5.35  | 22.4  |
| 3373 | IPI00379877.1 | KEMPINIQE             | 551.7806  | 2 | 26 |       | 0     | 26.0  |
| 3374 | IPI00135070.1 | FLLQHNLR              | 520.7967  | 2 | 25 | c b6  | 5.85  | 30.9  |
| 3375 | IPI00230534.1 | KMQVQMKE              | 527.8062  | 2 | 20 |       | 0     | 20.0  |
| 3376 | IPI00230534.1 | LGEEDAGAR             | 459.2509  | 2 | 29 |       | 0     | 29.0  |
| 3377 | IPI00378501.1 | ATAEKLK               | 380.7138  | 2 | 28 | y5    | 75.6  | 103.6 |
| 3378 | IPI00378501.1 | EEQKVALIMLEVQK        | 894.9544  | 2 | 15 |       | 0     | 15.0  |
| 3379 | IPI00378501.1 | FNIAELMAK             | 1053.5447 | 1 | 16 |       | 0     | 16.0  |
| 3380 | IPI00350771.2 | CHNVINK               | 885.5718  | 1 | 26 |       | 0     | 26.0  |
| 3381 | IPI00350771.2 | LFTKDLNQSASQSLQ       | 841.4128  | 2 | 17 |       | 0     | 17.0  |
| 3382 | IPI00350771.2 | TICSLLDK              | 475.2443  | 2 | 24 | c b5  | 7.7   | 31.7  |
| 3383 | IPI00277811.4 | FSCDIEQ               | 449.7374  | 2 | 26 |       | 0     | 26.0  |
| 3384 | IPI00277811.4 | RLLQQKMSLDGNPRAIHGPSE | 626.8472  | 4 | 15 |       | 0     | 15.0  |
| 3385 | IPI00350664.2 | ARFSDFYQALEVLRK       | 615.0015  | 3 | 19 | y5    | 7.7   | 26.7  |
| 3386 | IPI00350664.2 | ENGALL                | 309.2066  | 2 | 28 |       | 0     | 28.0  |
| 3387 | IPI00225431.1 | AIQDKLK               | 408.2421  | 2 | 32 | y4    | 62.3  | 94.3  |
| 3388 | IPI00225431.1 | KQTVAEQMMM            | 405.2225  | 3 | 20 |       | 0     | 20.0  |
| 3389 | IPI00225431.1 | LGSLVDSDEEDNFSQTAR    | 992.4618  | 2 | 15 | y++11 | 5.15  | 20.2  |
| 3390 | IPI00225431.1 | LGSLVDSDEEDNFSQTAR    | 992.4610  | 2 | 18 | y++11 | 5.35  | 23.4  |
| 3391 | IPI00119817.1 | GVA AQEV LK           | 458.2310  | 2 | 17 |       | 0     | 17.0  |
| 3392 | IPI00119817.1 | VLGLPAMQR             | 492.8263  | 2 | 38 | y7    | 13.65 | 51.7  |
| 3393 | IPI00137127.3 | QDEVINLLN             | 529.8179  | 2 | 21 |       | 0     | 21.0  |
| 3394 | IPI00137127.3 | QDEVINLLN             | 530.3027  | 2 | 22 |       | 0     | 22.0  |
| 3395 | IPI00228788.2 | QGGRHGK               | 370.1995  | 2 | 21 | c b6  | 1.4   | 22.4  |
| 3396 | IPI00387204.1 | WRARQLVKN             | 586.8103  | 2 | 16 |       | 0     | 16.0  |
| 3397 | IPI00379929.1 | IVTNNIK               | 401.7447  | 2 | 18 |       | 0     | 18.0  |
| 3398 | IPI00379929.1 | KNEFL                 | 326.1621  | 2 | 22 |       | 0     | 22.0  |
| 3399 | IPI00379929.1 | YHNTPEK               | 888.4754  | 1 | 17 |       | 0     | 17.0  |
| 3400 | IPI00387457.1 | GFIDSARQNNLELK        | 803.4039  | 2 | 19 |       | 0     | 19.0  |

|      |               |                 |          |   |    |      |       |      |
|------|---------------|-----------------|----------|---|----|------|-------|------|
| 3401 | IPI00387457.1 | KAGYMGSSDDHHSR  | 771.3952 | 2 | 19 | y5   | 6.6   | 25.6 |
| 3402 | IPI00387457.1 | LSESMAQV        | 433.2260 | 2 | 17 | c b6 | 0.7   | 17.7 |
| 3403 | IPI00350671.2 | QININVSDPHNT    | 677.4144 | 2 | 15 | y7   | 1.6   | 16.6 |
| 3404 | IPI00350671.2 | RDISRF          | 793.4672 | 1 | 21 |      | 0     | 21.0 |
| 3405 | IPI00125484.4 | AGQSTEE         | 361.2158 | 2 | 24 | c b6 | 6.2   | 30.2 |
| 3406 | IPI00125484.4 | FITLGAKKK       | 503.2740 | 2 | 27 |      | 0     | 27.0 |
| 3407 | IPI00125484.4 | KIGILYCR        | 341.5456 | 3 | 15 |      | 0     | 15.0 |
| 3408 | IPI00125484.4 | LQCQPL          | 380.1981 | 2 | 21 |      | 0     | 21.0 |
| 3409 | IPI00330157.1 | LLIGTK          | 322.7083 | 2 | 33 | c b5 | 27.2  | 60.2 |
| 3410 | IPI00330157.1 | SRMEVVSILLR     | 434.8970 | 3 | 32 | c b4 | 1.05  | 33.1 |
| 3411 | IPI00131114.1 | IMALAVGSK       | 453.2583 | 2 | 41 | y7   | 5.55  | 46.6 |
| 3412 | IPI00131114.1 | LVPPQPVHVQ      | 557.8034 | 2 | 22 | b4   | 7.1   | 29.1 |
| 3413 | IPI00273679.3 | FIGDYIQLTWTAPGK | 570.6510 | 3 | 24 | y7   | 1.25  | 25.3 |
| 3414 | IPI00273679.3 | IYGPR           | 303.1652 | 2 | 17 |      | 0     | 17.0 |
| 3415 | IPI00273679.3 | PNFLLTDNLRIGPR  | 895.9501 | 2 | 17 |      | 0     | 17.0 |
| 3416 | IPI00349207.2 | LLTSVLLDK       | 501.2840 | 2 | 21 | c b8 | 31.95 | 53.0 |
| 3417 | IPI00408645.1 | GMLASGTPNLVIP   | 643.8512 | 2 | 24 |      | 0     | 24.0 |
| 3418 | IPI00408645.1 | KMPKLK          | 372.7348 | 2 | 19 |      | 0     | 19.0 |
| 3419 | IPI00119935.2 | GDVIVLGMITQLK   | 693.8947 | 2 | 24 | y8   | 5.15  | 29.2 |
| 3420 | IPI00119935.2 | IIDAVEKQP       | 507.2909 | 2 | 18 |      | 0     | 18.0 |
| 3421 | IPI00119935.2 | IIIFREDLVNK     | 680.9752 | 2 | 17 |      | 0     | 17.0 |
| 3422 | IPI00125442.1 | ETQEDGR         | 417.7052 | 2 | 18 | y5   | 14.55 | 32.6 |
| 3423 | IPI00125442.1 | SPCTSRRLTGLLDR  | 544.6149 | 3 | 22 |      | 0     | 22.0 |
| 3424 | IPI00378446.1 | ACVHLLQREK      | 627.3407 | 2 | 20 | c b4 | 1.05  | 21.1 |
| 3425 | IPI00378446.1 | EQQKMLQQEQA     | 690.8133 | 2 | 19 |      | 0     | 19.0 |
| 3426 | IPI00378446.1 | QSQQQLQAQ       | 466.7694 | 2 | 18 | y6   | 1.05  | 19.1 |
| 3427 | IPI00378446.1 | SSIEVREAQARLR   | 379.6928 | 4 | 16 |      | 0     | 16.0 |
| 3428 | IPI00222467.1 | ASKSSEARL       | 474.7355 | 2 | 21 | y7   | 1.75  | 22.8 |
| 3429 | IPI00222467.1 | LKVRAGHSSE      | 404.5151 | 3 | 17 | c b6 | 1.6   | 18.6 |
| 3430 | IPI00311780.3 | DKNFSKMGKK      | 591.8280 | 2 | 18 |      | 0     | 18.0 |
| 3431 | IPI00311780.3 | ELEEDLKG        | 487.7325 | 2 | 17 | y6   | 13.65 | 30.7 |
| 3432 | IPI00311780.3 | KEVQILKGLNL     | 419.2691 | 3 | 17 |      | 0     | 17.0 |
| 3433 | IPI00322006.2 | LSEILR          | 365.7265 | 2 | 40 | y5   | 52.95 | 93.0 |
| 3434 | IPI00129191.1 | EVPIR           | 613.4401 | 1 | 20 |      | 0     | 20.0 |
| 3435 | IPI00129193.1 | CTNELYWLDQ      | 671.3745 | 2 | 20 | c b7 | 5.55  | 25.6 |
| 3436 | IPI00129193.1 | EAAKARSGQREK    | 666.3224 | 2 | 18 |      | 0     | 18.0 |
| 3437 | IPI00342702.3 | IGPQNK          | 328.7081 | 2 | 31 | y5   | 7.7   | 38.7 |
| 3438 | IPI00342702.3 | SYLIGER         | 419.2329 | 2 | 20 |      | 0     | 20.0 |
| 3439 | IPI00229931.1 | EIELENDLQPLQ    | 720.8748 | 2 | 17 |      | 0     | 17.0 |
| 3440 | IPI00130794.1 | APATEASK        | 774.4612 | 1 | 20 |      | 0     | 20.0 |
| 3441 | IPI00130794.1 | DAQGQPQ         | 373.2085 | 2 | 20 |      | 0     | 20.0 |

|      |               |                                          |           |   |    |      |      |       |
|------|---------------|------------------------------------------|-----------|---|----|------|------|-------|
| 3442 | IPI00226328.2 | KDGASPFQRRAR                             | 616.8052  | 2 | 21 |      | 0    | 21.0  |
| 3443 | IPI00226328.2 | QIASIVQ                                  | 758.4430  | 1 | 20 |      | 0    | 20.0  |
| 3444 | IPI00226270.2 | QSLLRK                                   | 373.2321  | 2 | 34 |      | 0    | 34.0  |
| 3445 | IPI00226270.2 | VTASNQLLR                                | 501.2905  | 2 | 28 | y7   | 5.85 | 33.9  |
| 3446 | IPI00129404.1 | QNTSLINQK                                | 523.8061  | 2 | 21 |      | 0    | 21.0  |
| 3447 | IPI00265452.3 | LAQAFLE                                  | 316.5310  | 3 | 16 |      | 0    | 16.0  |
| 3448 | IPI00123624.2 | DLSPYR                                   | 375.6855  | 2 | 26 |      | 0    | 26.0  |
| 3449 | IPI00137087.3 | ARSGTNCLLENLVISNGEK                      | 654.7149  | 3 | 36 | y7   | 22.4 | 58.4  |
| 3450 | IPI00137087.3 | HGNLVSGGVDKRQMASFQESVGETSSQSVVVAVDRIFTGS | 1107.0114 | 4 | 20 |      | 0    | 20.0  |
| 3451 | IPI00380792.1 | PMIHC                                    | 433.2157  | 3 | 17 |      | 0    | 17.0  |
| 3452 | IPI00337844.1 | AKEYDLAKK                                | 533.2645  | 2 | 29 | y7   | 85.6 | 114.6 |
| 3453 | IPI00337844.1 | KAVVSPPK                                 | 413.2635  | 2 | 16 |      | 0    | 16.0  |
| 3454 | IPI00130444.1 | EGSTAQLIINT                              | 573.7689  | 2 | 23 |      | 0    | 23.0  |
| 3455 | IPI00130444.1 | MSSNSFAYNEQS                             | 461.1808  | 3 | 15 | b4   | 6.6  | 21.6  |
| 3456 | IPI00116394.1 | DKEMNSQ                                  | 869.5059  | 1 | 17 |      | 0    | 17.0  |
| 3457 | IPI00116394.1 | ENSDPPISELSIEN                           | 816.3983  | 2 | 17 |      | 0    | 17.0  |
| 3458 | IPI00116394.1 | QSQDPPAQK                                | 500.2177  | 2 | 16 | c b8 | 1.95 | 18.0  |
| 3459 | IPI00134554.1 | DFIGQVHKT                                | 586.7768  | 2 | 19 | y8   | 21.2 | 40.2  |
| 3460 | IPI00134554.1 | QTPSSAPR                                 | 422.2379  | 2 | 19 | c b5 | 6.6  | 25.6  |
| 3461 | IPI00307900.1 | GHVLHLR                                  | 416.2514  | 2 | 27 | y4   | 27.2 | 54.2  |
| 3462 | IPI00307900.1 | SSAKVILT                                 | 409.7532  | 2 | 18 |      | 0    | 18.0  |
| 3463 | IPI00307900.1 | YISKEDIAEE                               | 598.7947  | 2 | 23 | y8   | 5.15 | 28.2  |
| 3464 | IPI00350413.2 | DNPGMTMPAPRISGVE                         | 771.3995  | 2 | 16 |      | 0    | 16.0  |
| 3465 | IPI00350413.2 | VLQTM                                    | 949.9861  | 2 | 18 |      | 0    | 18.0  |
| 3466 | IPI00226576.1 | QSCNFALR                                 | 498.8194  | 2 | 28 | b4   | 0.9  | 28.9  |
| 3467 | IPI00409937.1 | ELAQIIK                                  | 815.5023  | 1 | 41 |      | 0    | 41.0  |
| 3468 | IPI00409937.1 | ELAQIIK                                  | 408.2472  | 2 | 46 |      | 0    | 46.0  |
| 3469 | IPI00406770.1 | KLYKGVMLETYRNLN                          | 465.5070  | 4 | 15 |      | 0    | 15.0  |
| 3470 | IPI00406770.1 | KPYECNQCGKSFANHSNLKR                     | 813.3850  | 3 | 17 |      | 0    | 17.0  |
| 3471 | IPI00319287.1 | GRVKR                                    | 308.1825  | 2 | 15 |      | 0    | 15.0  |
| 3472 | IPI00319287.1 | INKSSGIVEASRIMNLYQFIQLYKDITSQ            | 1121.2045 | 3 | 15 |      | 0    | 15.0  |
| 3473 | IPI00128358.1 | AEIADGMAYLNAK                            | 692.3491  | 2 | 16 |      | 0    | 16.0  |
| 3474 | IPI00128358.1 | ELGQGSFGMVYEGNAK                         | 852.4252  | 2 | 16 | c b4 | 15.6 | 31.6  |
| 3475 | IPI00128358.1 | TLVTF                                    | 580.3340  | 1 | 21 |      | 0    | 21.0  |
| 3476 | IPI00111556.1 | RGEPHVTR                                 | 317.8421  | 3 | 22 |      | 0    | 22.0  |
| 3477 | IPI00223052.1 | NLPQSLLR                                 | 941.6714  | 1 | 23 |      | 0    | 23.0  |
| 3478 | IPI00223052.1 | NLPQSLLR                                 | 941.5921  | 1 | 24 |      | 0    | 24.0  |
| 3479 | IPI00223052.1 | TPENINK                                  | 816.4624  | 1 | 32 |      | 0    | 32.0  |
| 3480 | IPI00124744.1 | MFAQQKVT                                 | 485.7286  | 2 | 16 |      | 0    | 16.0  |
| 3481 | IPI00123501.1 | GGGGGSGGGGNRGGFNRS                       | 634.0060  | 3 | 20 |      | 0    | 20.0  |
| 3482 | IPI00123501.1 | LDQTNVYGSAQR                             | 676.3787  | 2 | 15 | y7   | 21.2 | 36.2  |

|      |               |                          |          |   |    |       |       |      |
|------|---------------|--------------------------|----------|---|----|-------|-------|------|
| 3483 | IPI00123501.1 | LDQTNVYGSAQR             | 676.3740 | 2 | 15 | y7    | 21.2  | 36.2 |
| 3484 | IPI00123501.1 | LDQTNVYGSAQR             | 676.3786 | 2 | 15 | y7    | 12.15 | 27.2 |
| 3485 | IPI00123501.1 | LDQTNVYGSAQR             | 676.3786 | 2 | 15 | y7    | 12.15 | 27.2 |
| 3486 | IPI00123501.1 | LDQTNVYGSAQR             | 676.3739 | 2 | 18 | y7    | 31.95 | 50.0 |
| 3487 | IPI00123501.1 | LDQTNVYGSAQR             | 676.3739 | 2 | 18 | y7    | 31.95 | 50.0 |
| 3488 | IPI00224069.1 | KIIGDADRK                | 508.3112 | 2 | 18 | y7    | 5.55  | 23.6 |
| 3489 | IPI00224069.1 | KVLEALK                  | 400.7535 | 2 | 28 | c b4  | 29.45 | 57.5 |
| 3490 | IPI00108049.1 | INELQNE                  | 430.2300 | 2 | 18 |       | 0     | 18.0 |
| 3491 | IPI00108049.1 | LSVRLLK                  | 828.5481 | 1 | 21 |       | 0     | 21.0 |
| 3492 | IPI00227851.1 | ASISSPSEEDAAEMPELLEK     | 717.0421 | 3 | 15 |       | 0     | 15.0 |
| 3493 | IPI00227851.1 | FESWEDDQVPK              | 690.3945 | 2 | 19 | y4    | 49.1  | 68.1 |
| 3494 | IPI00227851.1 | KTSEEFVR                 | 498.2621 | 2 | 20 | y5    | 15.6  | 35.6 |
| 3495 | IPI00227851.1 | NSIAMQEQMLACKGFL         | 921.4438 | 2 | 16 | y7    | 5.55  | 21.6 |
| 3496 | IPI00125034.1 | EALVDQADDFSG             | 634.2274 | 2 | 15 | b9    | 12.15 | 27.2 |
| 3497 | IPI00125034.1 | RVDDR                    | 330.7023 | 2 | 20 | y4    | 6.6   | 26.6 |
| 3498 | IPI00172226.3 | GVALVR                   | 307.7086 | 2 | 28 | c b5  | 6.6   | 34.6 |
| 3499 | IPI00172226.3 | LIDLDIGGK                | 472.3027 | 2 | 25 | c b6  | 23.75 | 48.8 |
| 3500 | IPI00172226.3 | NFECFGDK                 | 339.8502 | 3 | 19 |       | 0     | 19.0 |
| 3501 | IPI00117343.1 | LENTNLSATTSLSLR          | 540.9506 | 3 | 21 |       | 0     | 21.0 |
| 3502 | IPI00117343.1 | LGYVDEAGTVKLAGR          | 774.8674 | 2 | 25 |       | 0     | 25.0 |
| 3503 | IPI00404424.1 | GVNTRLRDR                | 465.7776 | 2 | 21 | c b7  | 1.25  | 22.3 |
| 3504 | IPI00404424.1 | KPTLTIQ                  | 800.5427 | 1 | 17 | P y6  | 1.6   | 18.6 |
| 3505 | IPI00126589.1 | ELAAEL                   | 323.1732 | 2 | 17 |       | 0     | 17.0 |
| 3506 | IPI00126589.1 | KTQPKLSAL                | 493.2253 | 2 | 16 | b8    | 1.95  | 18.0 |
| 3507 | IPI00381118.1 | HVEDSK                   | 357.7187 | 2 | 26 | c b5  | 14.55 | 40.6 |
| 3508 | IPI00381118.1 | ILIASNNK                 | 873.4164 | 1 | 24 |       | 0     | 24.0 |
| 3509 | IPI00342879.2 | IPACLCK                  | 431.2486 | 2 | 20 | P y6  | 14.55 | 34.6 |
| 3510 | IPI00342879.2 | KLTEQLQAAEK              | 630.3282 | 2 | 20 | y++10 | 1.95  | 22.0 |
| 3511 | IPI00342879.2 | RSLEKQSDSAGGIYQYDNYEEVAM | 924.4728 | 3 | 16 |       | 0     | 16.0 |
| 3512 | IPI00223904.1 | YKAVVK                   | 354.1955 | 2 | 24 | y5    | 1.25  | 25.3 |
| 3513 | IPI00357734.2 | FQRTNQSSFLK              | 678.8973 | 2 | 17 | y4    | 0.9   | 17.9 |
| 3514 | IPI00357734.2 | FQRTNQSSFLK              | 678.8973 | 2 | 17 |       | 0     | 17.0 |
| 3515 | IPI00357734.2 | FQRTNQSSFLK              | 678.9221 | 2 | 20 | y4    | 0.2   | 20.2 |
| 3516 | IPI00357734.2 | FQRTNQSSFLK              | 678.9221 | 2 | 21 | y4    | 0.55  | 21.6 |
| 3517 | IPI00357734.2 | FQRTNQSSFLK              | 678.9077 | 2 | 22 |       | 0     | 22.0 |
| 3518 | IPI00357734.2 | FQRTNQSSFLK              | 678.8973 | 2 | 22 | y4    | 0.35  | 22.4 |
| 3519 | IPI00113539.2 | IAWESPQGQVS              | 401.8826 | 3 | 17 |       | 0     | 17.0 |
| 3520 | IPI00113539.2 | KDNRGNLLQCVCT            | 789.9499 | 2 | 17 | y6    | 5.85  | 22.9 |
| 3521 | IPI00113539.2 | NTFAEITGLSPGV            | 653.8537 | 2 | 23 |       | 0     | 23.0 |
| 3522 | IPI00378873.1 | MLIQLPSAS                | 326.1716 | 3 | 23 |       | 0     | 23.0 |
| 3523 | IPI00379692.1 | VLAGLIR                  | 371.2242 | 2 | 24 | y4    | 16.9  | 40.9 |

|      |               |                            |           |   |    |      |       |      |
|------|---------------|----------------------------|-----------|---|----|------|-------|------|
| 3524 | IPI00109234.2 | AFSVAPFDQNLSIDGK           | 855.4727  | 2 | 17 |      | 0     | 17.0 |
| 3525 | IPI00109234.2 | AFSVAPFDQNLSIDGK           | 855.4728  | 2 | 31 |      | 0     | 31.0 |
| 3526 | IPI00109234.2 | DSAPELNVSSSE               | 618.2681  | 2 | 17 |      | 0     | 17.0 |
| 3527 | IPI00109234.2 | ITRIEVDG                   | 902.4420  | 1 | 17 | y4   | 49.1  | 66.1 |
| 3528 | IPI00126861.2 | GVLLGR                     | 307.7086  | 2 | 26 |      | 0     | 26.0 |
| 3529 | IPI00126861.2 | SVEVSDPVPAGDLVK            | 756.4246  | 2 | 33 | P y7 | 49.6  | 82.6 |
| 3530 | IPI00136238.1 | MASQLQ                     | 368.2041  | 2 | 16 |      | 0     | 16.0 |
| 3531 | IPI00136238.1 | SNVISYVTVND                | 649.3197  | 2 | 16 | y8   | 21.2  | 37.2 |
| 3532 | IPI00136238.1 | VFEMLEQNLYDFLK             | 895.4155  | 2 | 16 | y4   | 29.45 | 45.5 |
| 3533 | IPI00221483.2 | MAAAVATVQR                 | 517.7504  | 2 | 24 |      | 0     | 24.0 |
| 3534 | IPI00263048.1 | EEAVEIHSEGQPGQQSQAQLHASLAK | 604.7358  | 5 | 17 |      | 0     | 17.0 |
| 3535 | IPI00227091.2 | AMEKEATDK                  | 519.7769  | 2 | 22 |      | 0     | 22.0 |
| 3536 | IPI00227091.2 | HLALQLQDSQK                | 641.7854  | 2 | 16 |      | 0     | 16.0 |
| 3537 | IPI00227091.2 | ILSMQ                      | 304.2000  | 2 | 16 | y4   | 0.7   | 16.7 |
| 3538 | IPI00227091.2 | SSLEEQIR                   | 481.7929  | 2 | 30 |      | 0     | 30.0 |
| 3539 | IPI00318798.1 | LNGVDALR                   | 429.7342  | 2 | 34 |      | 0     | 34.0 |
| 3540 | IPI00133813.5 | ANAHLVAAFEK                | 586.2990  | 2 | 25 |      | 0     | 25.0 |
| 3541 | IPI00133813.5 | EGLQMY                     | 378.7039  | 2 | 26 | c b4 | 49.1  | 75.1 |
| 3542 | IPI00406571.1 | AAGNLKLK                   | 815.4943  | 1 | 23 |      | 0     | 23.0 |
| 3543 | IPI00406571.1 | EDIQRGLNDYLEK              | 797.3650  | 2 | 20 |      | 0     | 20.0 |
| 3544 | IPI00406571.1 | FELINK                     | 382.7116  | 2 | 15 |      | 0     | 15.0 |
| 3545 | IPI00406571.1 | TLLNSKRQE                  | 544.8109  | 2 | 18 | y7   | 22.4  | 40.4 |
| 3546 | IPI00406571.1 | VIDVHAR                    | 405.2352  | 2 | 24 | y5   | 23.75 | 47.8 |
| 3547 | IPI00116002.1 | CNDILHVTDTMFQGR            | 912.4339  | 2 | 21 |      | 0     | 21.0 |
| 3548 | IPI00116002.1 | EKMTML                     | 768.3967  | 1 | 25 |      | 0     | 25.0 |
| 3549 | IPI00111110.1 | AQHSIQLESR                 | 585.7890  | 2 | 15 |      | 0     | 15.0 |
| 3550 | IPI00111110.1 | EYNNDEK                    | 304.8310  | 3 | 15 |      | 0     | 15.0 |
| 3551 | IPI00111110.1 | NVAIL                      | 530.3551  | 1 | 29 |      | 0     | 29.0 |
| 3552 | IPI00138860.1 | QFNAQILEMAQANSAGIS         | 632.3701  | 3 | 17 |      | 0     | 17.0 |
| 3553 | IPI00138860.1 | RMKMEMDE                   | 1101.5094 | 1 | 15 |      | 0     | 15.0 |
| 3554 | IPI00343008.2 | NQRLVEK                    | 887.5390  | 1 | 28 |      | 0     | 28.0 |
| 3555 | IPI00343008.2 | SSSEQVVLGQVPNKQK           | 577.0108  | 3 | 19 | b6   | 25.35 | 44.4 |
| 3556 | IPI00120119.1 | HLDVAYNLLEGHTELAPLWLL      | 806.7099  | 3 | 18 | b4   | 29.45 | 47.5 |
| 3557 | IPI00379373.1 | EYNEYQ                     | 423.7371  | 2 | 28 | c b4 | 16.9  | 44.9 |
| 3558 | IPI00379373.1 | IFVGTSGTIR                 | 575.2954  | 2 | 22 | y8   | 5.35  | 27.4 |
| 3559 | IPI00379373.1 | IFVGTSGTIR                 | 575.2971  | 2 | 27 | y9   | 4.95  | 32.0 |
| 3560 | IPI00379373.1 | IQDIK                      | 308.6869  | 2 | 22 |      | 0     | 22.0 |
| 3561 | IPI00378585.1 | EHTLQASNQSEII              | 735.9000  | 2 | 19 |      | 0     | 19.0 |
| 3562 | IPI00378585.1 | LQTVKSLAG                  | 458.7482  | 2 | 16 |      | 0     | 16.0 |
| 3563 | IPI00379876.1 | EIQSGPQ                    | 380.2261  | 2 | 32 | y5   | 14.55 | 46.6 |
| 3564 | IPI00340991.2 | DPNMKGAM                   | 440.2376  | 2 | 18 |      | 0     | 18.0 |

|      |               |                         |           |   |    |       |       |       |
|------|---------------|-------------------------|-----------|---|----|-------|-------|-------|
| 3565 | IPI00119755.1 | FSQLVPLLAR              | 557.8528  | 2 | 42 | P y5  | 65.15 | 107.2 |
| 3566 | IPI00134095.1 | DQVSKTSIGWLR            | 695.9016  | 2 | 25 | y5    | 7.7   | 32.7  |
| 3567 | IPI00134095.1 | VSQALDAR                | 430.2356  | 2 | 21 | y5    | 6.6   | 27.6  |
| 3568 | IPI00135652.1 | DALELNK                 | 401.7370  | 2 | 22 | y5    | 52.95 | 75.0  |
| 3569 | IPI00135652.1 | EFLIFLLPLINIQLK         | 486.7872  | 4 | 17 |       | 0     | 17.0  |
| 3570 | IPI00353560.3 | AELTMK                  | 821.4930  | 1 | 18 |       | 0     | 18.0  |
| 3571 | IPI00353560.3 | ELSKPVAQPWMAPPVPRAK     | 1060.0349 | 2 | 16 |       | 0     | 16.0  |
| 3572 | IPI00353560.3 | HGRVMS                  | 343.7027  | 2 | 18 | y5    | 7.1   | 25.1  |
| 3573 | IPI00353560.3 | LKAMQAVQQEGAGGQ         | 758.8341  | 2 | 16 |       | 0     | 16.0  |
| 3574 | IPI00110560.3 | ECETAIAALNSCLR          | 804.4018  | 2 | 18 | c b5  | 6.6   | 24.6  |
| 3575 | IPI00110560.3 | GQRDVDNALR              | 572.3349  | 2 | 15 | c b6  | 1.25  | 16.3  |
| 3576 | IPI00110560.3 | HPGDPEQQR               | 384.5562  | 3 | 17 |       | 0     | 17.0  |
| 3577 | IPI00110560.3 | NLEKDLQEIKAAAR          | 533.6110  | 3 | 17 | y++12 | 4.8   | 21.8  |
| 3578 | IPI00346752.2 | DSFLTTLVR               | 526.2312  | 2 | 21 | y5    | 7.1   | 28.1  |
| 3579 | IPI00346752.2 | EENLQTK                 | 431.2271  | 2 | 22 |       | 0     | 22.0  |
| 3580 | IPI00346752.2 | SEQQITANPAEKEESK        | 895.9503  | 2 | 19 |       | 0     | 19.0  |
| 3581 | IPI00153556.1 | MFSLKNVLYFQAGLGVLANMSLL | 863.4703  | 3 | 16 |       | 0     | 16.0  |
| 3582 | IPI00283526.5 | IDMVMAAQPR              | 566.7562  | 2 | 17 | b5    | 38.2  | 55.2  |
| 3583 | IPI00283526.5 | LATVNVALNMLGELDKK       | 915.4801  | 2 | 16 | y++11 | 13.65 | 29.7  |
| 3584 | IPI00283526.5 | LLPITSRIYMLLQR          | 578.3145  | 3 | 18 | y5    | 1.25  | 19.3  |
| 3585 | IPI00283526.5 | NCLTVLAARNPAK           | 714.8989  | 2 | 22 | y9    | 20.1  | 42.1  |
| 3586 | IPI00409293.1 | VSNHSGEK                | 429.2581  | 2 | 34 |       | 0     | 34.0  |
| 3587 | IPI00336794.1 | EVNPTLK                 | 400.7713  | 2 | 32 | c b5  | 1.4   | 33.4  |
| 3588 | IPI00336794.1 | KNPQENLK                | 486.7958  | 2 | 25 |       | 0     | 25.0  |
| 3589 | IPI00336794.1 | KSMGENTMK               | 521.7636  | 2 | 17 |       | 0     | 17.0  |
| 3590 | IPI00153809.1 | CVNIPTVR                | 479.7876  | 2 | 21 | c b6  | 5.55  | 26.6  |
| 3591 | IPI00153809.1 | KGQLVAAGK               | 436.7694  | 2 | 32 |       | 0     | 32.0  |
